# Supplementary material
Source: PubMed Central journal article supplement (PMC2753520)

# Supporting Information

## Improvement of Pharmacological Properties of Irreversible Thyroid Receptor Coactivator Binding Inhibitors

*Jong Yeon Hwang<sup>1</sup>, Leggy A. Arnold<sup>1</sup>, Fangyi Zhu<sup>1</sup>, Aaron Kosinski<sup>1</sup>, Thomas J. Mangano<sup>2</sup>, Vincent Setola<sup>2</sup>, Bryan L. Roth<sup>2</sup>, and R. Kiplin Guy<sup>1\*</sup>*

R. Kiplin Guy, St Jude Children's Hospital, Department of Chemical Biology and Therapeutics,  
262 Danny Thomas Place, Memphis TN, 38105-3678, USA. Tel (901) 595-5714; Fax (901) 595-  
5715 e-mail: kip.guy@stjude.org

### Contents

|                                                                                                    |     |
|----------------------------------------------------------------------------------------------------|-----|
| <b>Table 1.</b> Summary of $\beta$ -Aminophenylketones Regioisomers and Ring Substitution .....    | S2  |
| Table 2. Summary of $\beta$ -Aminoarylketones with Alternate Aromatic Rings.....                   | S4  |
| Table 3. Summary of $\alpha$ -Substituted $\beta$ -Aminophenylketones .....                        | S4  |
| Table 4. Summary of $\beta$ -Aminophenylketones Bearing Different Nitrogen Substituents .....      | S5  |
| Table 5. Summary the Activities of Hydrophobic Side Chain Modified $\beta$ -Aminophenylketones.... | S6  |
| Table 6. Summary of the Second Generation Compounds .....                                          | S7  |
| Experimental and Synthetic Procedures and Tabulated Spectral Data .....                            | S11 |
| Spectral and Chromatographic Data .....                                                            | S84 |

**Table 1.** Summary of  $\beta$ -Aminophenylketones Regioisomers and Ring Substitution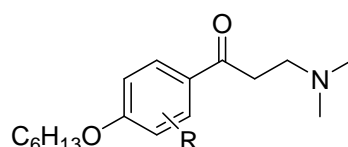

| Compound      |                     | SRC Binding Inhibition (IC <sub>50</sub> , $\mu$ M) <sup>a</sup> |                 | Cell viability HepG 2 (EC <sub>50</sub> , $\mu$ M) <sup>b</sup> | Solubility ( $\mu$ M) <sup>c</sup> | Permeability (10 <sup>-6</sup> cm/s) <sup>d</sup> | Synthetic Method <sup>e</sup> |
|---------------|---------------------|------------------------------------------------------------------|-----------------|-----------------------------------------------------------------|------------------------------------|---------------------------------------------------|-------------------------------|
| No.           | R                   | TR $\alpha$                                                      | TR $\beta$      |                                                                 |                                    |                                                   |                               |
| <b>1</b>      | H                   | 7.4 $\pm$ 1.0                                                    | 9.6 $\pm$ 1.1   | 54 $\pm$ 9                                                      | 21 $\pm$ 1                         | 1550 $\pm$ 340                                    | A                             |
| <b>9</b>      | H                   | 16.6 $\pm$ 1.8                                                   | 16.5 $\pm$ 1.5  | 65 $\pm$ 19                                                     | 180 $\pm$ 10                       | 1040 $\pm$ 100                                    | A                             |
| <b>10</b>     | H                   | 5.3 $\pm$ 0.6                                                    | 7.1 $\pm$ 0.8   | 45 $\pm$ 5                                                      | 160 $\pm$ 10                       | 830 $\pm$ 70                                      | B                             |
| <b>11</b>     | 5-Me                | >50                                                              | >50             | >100                                                            | 140 $\pm$ 11                       | 1100 $\pm$ 10                                     | A                             |
| <b>12{1}</b>  | 2-Me                | 3.5 $\pm$ 0.3                                                    | 10.1 $\pm$ 1.2  | 38 $\pm$ 26                                                     | 130 $\pm$ 20                       | 1230 $\pm$ 120                                    | A                             |
| <b>12{2}</b>  | 3-Me                | 4.0 $\pm$ 0.3                                                    | 5.3 $\pm$ 0.6   | 32 $\pm$ 8                                                      | 130 $\pm$ 10                       | 750 $\pm$ 90                                      | A                             |
| <b>12{3}</b>  | 2-MeO               | 3.8 $\pm$ 0.3                                                    | 7.0 $\pm$ 1.1   | 100 $\pm$ 37                                                    | 160 $\pm$ 2                        | 950 $\pm$ 70                                      | A                             |
| <b>12{4}</b>  | 3-MeO               | 22.2 $\pm$ 6.5                                                   | 25.3 $\pm$ 7.0  | 62 $\pm$ 13                                                     | 160 $\pm$ 10                       | 1040 $\pm$ 260                                    | B                             |
| <b>12{5}</b>  | 2-MeS               | 4.3 $\pm$ 0.5                                                    | 5.1 $\pm$ 0.5   | 29 $\pm$ 6                                                      | 90 $\pm$ 10                        | 1270 $\pm$ 160                                    | A                             |
| <b>12{6}</b>  | 3-MeS               | 5.8 $\pm$ 0.6                                                    | 10.4 $\pm$ 2.1  | >100                                                            | 110 $\pm$ 3                        | 1450 $\pm$ 530                                    | B                             |
| <b>12{7}</b>  | 3-Me <sub>2</sub> N | >50                                                              | >50             | >100                                                            | 180 $\pm$ 10                       | 170 $\pm$ 30                                      | A                             |
| <b>12{8}</b>  | 2- <i>tert</i> Bu   | 5.4 $\pm$ 0.5                                                    | 5.0 $\pm$ 0.7   | 16 $\pm$ 2                                                      | 6 $\pm$ 1                          | 190 $\pm$ 60                                      | A                             |
| <b>12{9}</b>  | 2-F                 | 3.5 $\pm$ 0.4                                                    | 4.7 $\pm$ 0.4   | 37 $\pm$ 10                                                     | 110 $\pm$ 10                       | 700 $\pm$ 100                                     | A                             |
| <b>12{10}</b> | 2-Cl                | 2.6 $\pm$ 0.2                                                    | 4.3 $\pm$ 1.9   | 32 $\pm$ 13                                                     | 30 $\pm$ 10                        | 1020 $\pm$ 230                                    | A                             |
| <b>12{11}</b> | 3-Cl                | 3.2 $\pm$ 0.4                                                    | 1.8 $\pm$ 0.2   | 53 $\pm$ 9                                                      | 72 $\pm$ 7                         | 1960 $\pm$ 940                                    | A                             |
| <b>12{12}</b> | 2-Br                | 2.3 $\pm$ 0.2                                                    | 2.6 $\pm$ 0.3   | 33 $\pm$ 11                                                     | 19 $\pm$ 7                         | 460 $\pm$ 70                                      | A                             |
| <b>12{13}</b> | 3-Br                | 1.1 $\pm$ 0.1                                                    | 1.4 $\pm$ 0.2   | 54 $\pm$ 13                                                     | 78 $\pm$ 2                         | 80 $\pm$ 6                                        | A                             |
| <b>12{14}</b> | 2-I                 | 1.2 $\pm$ 0.1                                                    | 2.7 $\pm$ 0.3   | 31 $\pm$ 11                                                     | 14 $\pm$ 3                         | 540 $\pm$ 60                                      | A                             |
| <b>12{15}</b> | 3-I                 | 1.9 $\pm$ 0.4                                                    | 2.1 $\pm$ 0.4   | 55 $\pm$ 10                                                     | 48 $\pm$ 8                         | 270 $\pm$ 110                                     | A                             |
| <b>12{16}</b> | 2-MeSO <sub>2</sub> | 9.3 $\pm$ 1.1                                                    | 8.4 $\pm$ 1.1   | >100                                                            | 130 $\pm$ 1                        | 730 $\pm$ 50                                      | A                             |
| <b>12{17}</b> | 3-MeSO <sub>2</sub> | 4.7 $\pm$ 0.6                                                    | 2.4 $\pm$ 0.3   | 45 $\pm$ 12                                                     | 40 $\pm$ 10                        | 850 $\pm$ 220                                     | B                             |
| <b>12{18}</b> | 2-CF <sub>3</sub>   | 3.4 $\pm$ 0.3                                                    | 2.7 $\pm$ 0.3   | 34 $\pm$ 9                                                      | 6 $\pm$ 2                          | 930 $\pm$ 130                                     | B                             |
| <b>12{19}</b> | 3-CF <sub>3</sub>   | 1.4 $\pm$ 0.1                                                    | 1.9 $\pm$ 0.2   | 10 $\pm$ 13                                                     | 20 $\pm$ 10                        | 500 $\pm$ 230                                     | B                             |
| <b>12{20}</b> | 2-NO <sub>2</sub>   | 3.7 $\pm$ 0.3                                                    | 3.0 $\pm$ 0.4   | 43 $\pm$ 7                                                      | 54 $\pm$ 8                         | 1340 $\pm$ 410                                    | B                             |
| <b>12{21}</b> | 2,6-Me <sub>2</sub> | 7.7 $\pm$ 0.6                                                    | 5.0 $\pm$ 0.6   | 41 $\pm$ 5                                                      | 51 $\pm$ 8                         | 730 $\pm$ 80                                      | B                             |
| <b>12{22}</b> | 3,5-Me <sub>2</sub> | 1.3 $\pm$ 0.1                                                    | 1.7 $\pm$ 0.1   | 15 $\pm$ 1                                                      | 30 $\pm$ 20                        | 650 $\pm$ 120                                     | A                             |
| <b>12{23}</b> | 2-Me-5- <i>i</i> Pr | 3.0 $\pm$ 0.4                                                    | 1.79 $\pm$ 1.28 | 26 $\pm$ 4                                                      | 20 $\pm$ 5                         | 860 $\pm$ 370                                     | B                             |

|                |                     |              |          |       |      |          |   |
|----------------|---------------------|--------------|----------|-------|------|----------|---|
| <b>12</b> {24} | 2,3-Cl <sub>2</sub> | 0.81±0.1     | 1.1±0.1  | 31±2  | 10±1 | 600±330  | B |
| <b>12</b> {25} | 2,5-Cl <sub>2</sub> | 0.6±0.1      | 0.6±0.1  | 62±23 | 20±1 | 1040±190 | B |
| <b>12</b> {26} | 3,5-Cl <sub>2</sub> | <sup>f</sup> | 0.69±0.1 | 18±2  | 2±1  | 700±300  | B |
| <b>12</b> {27} | 2-Ph                | 7.1±1.1      | 14.1±5.1 | 16±3  | 5±3  | 830±200  | A |
| <b>12</b> {28} | 2-Bn                | 14.8±7.2     | >50      | 24±3  | 3±1  | 230±60   | A |

<sup>a</sup>Values are the mean of three independent experiments in triplicate. <sup>b,c,d</sup>Values are means of two independent experiments in triplicate. <sup>e</sup>A is Friedel-Crafts acylation and B is Mannich reaction.

Table 2. Summary of  $\beta$ -Aminoarylketones with Alternate Aromatic Rings

| No            | SRC Binding Inhibition<br>(IC <sub>50</sub> , $\mu$ M) <sup>a</sup> |                | Cell viability<br>HepG 2 (EC <sub>50</sub> ,<br>$\mu$ M) <sup>b</sup> | Solubility<br>( $\mu$ M) <sup>c</sup> | Permeability<br>(10 <sup>-6</sup> cm/s) <sup>d</sup> | Synthetic<br>Method <sup>e</sup> |
|---------------|---------------------------------------------------------------------|----------------|-----------------------------------------------------------------------|---------------------------------------|------------------------------------------------------|----------------------------------|
|               | TR $\alpha$                                                         | TR $\beta$     |                                                                       |                                       |                                                      |                                  |
| <b>9</b>      | 16.6 $\pm$ 1.8                                                      | 16.5 $\pm$ 1.5 | 65 $\pm$ 19                                                           | 180 $\pm$ 10                          | 1040 $\pm$ 100                                       | A                                |
| <b>13</b> {1} | 4.1 $\pm$ 0.4                                                       | 4.0 $\pm$ 0.4  | 38 $\pm$ 6                                                            | 22 $\pm$ 4                            | 660 $\pm$ 90                                         | A                                |
| <b>13</b> {2} | >50                                                                 | >50            | >100                                                                  | 1.0 $\pm$ 0.2                         | 150 $\pm$ 80                                         | A                                |
| <b>13</b> {3} | 13.4 $\pm$ 10.8                                                     | >50            | 65 $\pm$ 14                                                           | 8 $\pm$ 4                             | 1420 $\pm$ 140                                       | B                                |

<sup>a</sup>Values are the mean of three independent experiments in triplicate. <sup>b,c,d</sup>Values are means of two independent experiments in triplicate. <sup>e</sup>A is Friedel-Crafts acylation and B is Mannich reaction.

Table 3. Summary of  $\alpha$ -Substituted  $\beta$ -Aminophenylketones

| No.           | R                                                                                   | SRC Binding Inhibition<br>(IC <sub>50</sub> , $\mu$ M) <sup>a</sup> |                | Cell viability<br>HepG 2 (EC <sub>50</sub> ,<br>$\mu$ M) <sup>b</sup> | Solubility<br>( $\mu$ M) <sup>c</sup> | Permeability<br>(10 <sup>-6</sup> cm/s) <sup>d</sup> | Synthetic<br>Method <sup>e</sup> |
|---------------|-------------------------------------------------------------------------------------|---------------------------------------------------------------------|----------------|-----------------------------------------------------------------------|---------------------------------------|------------------------------------------------------|----------------------------------|
|               |                                                                                     | TR $\alpha$                                                         | TR $\beta$     |                                                                       |                                       |                                                      |                                  |
| <b>9</b>      | H                                                                                   | 16.6 $\pm$ 1.8                                                      | 16.5 $\pm$ 1.5 | 65 $\pm$ 19                                                           | 180 $\pm$ 10                          | 1040 $\pm$ 100                                       | A                                |
| <b>14</b> {1} | Me                                                                                  | >50                                                                 | >50            | 56 $\pm$ 18                                                           | 196 $\pm$ 2                           | 1350 $\pm$ 630                                       | B                                |
| <b>14</b> {2} | iPr                                                                                 | >50                                                                 | >50            | 62 $\pm$ 27                                                           | 145 $\pm$ 6                           | 1260 $\pm$ 170                                       | B                                |
| <b>14</b> {3} | Ph                                                                                  | >50                                                                 | >50            | 27 $\pm$ 19                                                           | 11 $\pm$ 1                            | 910 $\pm$ 90                                         | B                                |
| <b>14</b> {4} | 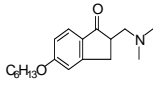 | 1.9 $\pm$ 0.2                                                       | 1.7 $\pm$ 0.3  | 14 $\pm$ 2                                                            | 7 $\pm$ 2                             | 230 $\pm$ 40                                         | B                                |
| <b>14</b> {5} |  | 1.9 $\pm$ 0.3                                                       | 2.3 $\pm$ 0.2  | 12 $\pm$ 2                                                            | 90 $\pm$ 10                           | 710 $\pm$ 90                                         | B                                |
| <b>14</b> {6} |  | 1.3 $\pm$ 0.1                                                       | 1.6 $\pm$ 0.1  | 12 $\pm$ 1                                                            | 13 $\pm$ 10                           | 700 $\pm$ 130                                        | B                                |

<sup>a</sup>Values are the mean of three independent experiments in triplicate. <sup>b,c,d</sup>Values are means of two independent experiments in triplicate. <sup>e</sup>A is Friedel-Crafts acylation and B is Mannich reaction.

Table 4. Summary of  $\beta$ -Aminophenylketones Bearing Different Nitrogen Substituents

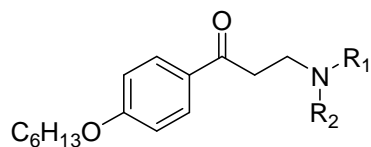

|        | R <sub>1</sub> R <sub>2</sub> NH                                                     | SRC Binding Inhibition (IC <sub>50</sub> , $\mu$ M) <sup>a</sup> |                | Cell viability HepG 2 (EC <sub>50</sub> , $\mu$ M) <sup>b</sup> | Solubility ( $\mu$ M) <sup>c</sup> | Permeability (10 <sup>-6</sup> cm/s) <sup>d</sup> | hERG <sup>e</sup> | pKa          |
|--------|--------------------------------------------------------------------------------------|------------------------------------------------------------------|----------------|-----------------------------------------------------------------|------------------------------------|---------------------------------------------------|-------------------|--------------|
|        |                                                                                      | TR $\alpha$                                                      | TR $\beta$     |                                                                 |                                    |                                                   |                   |              |
| 9      | Me <sub>2</sub> NH                                                                   | 16.6 $\pm$ 1.8                                                   | 16.5 $\pm$ 1.5 | 65 $\pm$ 19                                                     | 180 $\pm$ 10                       | 1040 $\pm$ 100                                    | 61 $\pm$ 9        | 9.12         |
| 15{1}  | Bu <sub>2</sub> NH                                                                   | 6.3 $\pm$ 0.5                                                    | 2.7 $\pm$ 0.4  | 48 $\pm$ 20                                                     | 4 $\pm$ 0.3                        | 560 $\pm$ 170                                     | 48 $\pm$ 15       | 9.95         |
| 15{2}  |  NH | 9.2 $\pm$ 1.0                                                    | 9.1 $\pm$ 1.2  | 66 $\pm$ 34                                                     | 195 $\pm$ 2                        | 2130 $\pm$ 700                                    | 75 $\pm$ 2        | 9.61         |
| 15{3}  |  NH | 4.8 $\pm$ 0.5                                                    | 18.9 $\pm$ 6.8 | 59 $\pm$ 17                                                     | 186 $\pm$ 4                        | 1280 $\pm$ 110                                    | 69 $\pm$ 9        | 9.28         |
| 15{4}  |  NH | 19.8 $\pm$ 2.0                                                   | 22.0 $\pm$ 2.4 | 67 $\pm$ 22                                                     | 74 $\pm$ 3                         | 1660 $\pm$ 70                                     | 35 $\pm$ 4        | 6.45         |
| 15{5}  |     | 8.4 $\pm$ 0.6                                                    | 5.6 $\pm$ 0.9  | 54 $\pm$ 13                                                     | 160 $\pm$ 20                       | 2300 $\pm$ 420                                    | 60 $\pm$ 7        | 8.1          |
| 15{6}  |    | 3.0 $\pm$ 0.3                                                    | 3.8 $\pm$ 0.3  | 81 $\pm$ 32                                                     | 2 $\pm$ 0.4                        | undetected                                        | 29 $\pm$ 12       | 6.13         |
| 15{7}  |   | 7.7 $\pm$ 0.6                                                    | 4.1 $\pm$ 0.5  | 56 $\pm$ 19                                                     | 78 $\pm$ 6                         | 1790 $\pm$ 360                                    | 32 $\pm$ 13       | 6.5          |
| 15{8}  |   | >50                                                              | >50            | >130                                                            | 1 $\pm$ 0.1                        | Undetected                                        | 8 $\pm$ 11        | 5.26         |
| 15{9}  |   | >50                                                              | >50            | >130                                                            | 1 $\pm$ 0.5                        | 0.2 $\pm$ 0.4                                     | 22 $\pm$ 1        | 4.38         |
| 15{10} |   | >50                                                              | >50            | >130                                                            | 0.2 $\pm$ 0.2                      | 2.0 $\pm$ 2                                       | 18 $\pm$ 3        | 3.67         |
| 15{11} |   | >50                                                              | >50            | 54 $\pm$ 31                                                     | 48 $\pm$ 5                         | 1490 $\pm$ 140                                    | 32 $\pm$ 3        | <sup>f</sup> |
| 15{12} |   | >50                                                              | >50            | >130                                                            | 29 $\pm$ 3                         | 1300 $\pm$ 150                                    | -11 $\pm$ 6       | <sup>f</sup> |

<sup>a</sup>Values are the mean of three independent experiments in triplicate. <sup>b,c,d</sup>Values are means of two independent experiments in triplicate. <sup>e</sup>Values are the mean of two independent experiments in quadruplicate. <sup>f</sup>Not available.

Table 5. Summary the Activities of Hydrophobic Side Chain Modified  $\beta$ -Aminophenylketones

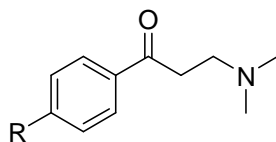

| No           | R | SRC Binding Inhibition (IC <sub>50</sub> , $\mu$ M) <sup>a</sup> |                | Cell viability HepG 2 (EC <sub>50</sub> , $\mu$ M) <sup>b</sup> | Solubility ( $\mu$ M) <sup>c</sup> | Permeability (Pe, 10 <sup>-6</sup> cm/s) <sup>d</sup> | hERG <sup>e</sup> | Synthetic Route <sup>f</sup> |
|--------------|---|------------------------------------------------------------------|----------------|-----------------------------------------------------------------|------------------------------------|-------------------------------------------------------|-------------------|------------------------------|
|              |   | TR $\alpha$                                                      | TR $\beta$     |                                                                 |                                    |                                                       |                   |                              |
| <b>1</b>     |   | 7.5 $\pm$ 1.0                                                    | 9.6 $\pm$ 1.1  | 54 $\pm$ 9                                                      | 22 $\pm$ 1                         | 1550 $\pm$ 340                                        | 68 $\pm$ 12       | A                            |
| <b>9</b>     |   | 16.6 $\pm$ 1.8                                                   | 16.5 $\pm$ 1.5 | 65 $\pm$ 19                                                     | 180 $\pm$ 10                       | 1040 $\pm$ 100                                        | 61 $\pm$ 9        | A                            |
| <b>16{1}</b> |   | 30.9 $\pm$ 11.1                                                  | >50            | >100                                                            | 220 $\pm$ 3                        | 160 $\pm$ 30                                          | 3 $\pm$ 1         | A                            |
| <b>16{2}</b> |   | >50                                                              | >50            | >100                                                            | 200 $\pm$ 10                       | 140 $\pm$ 30                                          | 16 $\pm$ 10       | A                            |
| <b>16{3}</b> |   | >50                                                              | >50            | >100                                                            | 240 $\pm$ 3                        | 320 $\pm$ 60                                          | 35 $\pm$ 10       | B                            |
| <b>16{4}</b> |   | 6.8 $\pm$ 0.7                                                    | 5.9 $\pm$ 0.6  | 34 $\pm$ 15                                                     | 83 $\pm$ 2                         | 1470 $\pm$ 200                                        | 48 $\pm$ 4        | A                            |
| <b>16{5}</b> |   | 6.2 $\pm$ 0.7                                                    | 4.9 $\pm$ 0.7  | >100                                                            | 58 $\pm$ 6                         | 780 $\pm$ 80                                          | 36 $\pm$ 9        | A                            |
| <b>16{6}</b> |   | 16.8 $\pm$ 2.8                                                   | 8.1 $\pm$ 1.4  | >100                                                            | 96 $\pm$ 10                        | 770 $\pm$ 70                                          | 15 $\pm$ 7        | B                            |
| <b>16{7}</b> |   | 9.8 $\pm$ 1.5                                                    | 12.4 $\pm$ 3.2 | >100                                                            | 210 $\pm$ 4                        | 560 $\pm$ 80                                          | 38 $\pm$ 7        | B                            |
| <b>16{8}</b> |   | 33.3 $\pm$ 10.2                                                  | >50            | >100                                                            | 170 $\pm$ 5                        | 50 $\pm$ 20                                           | 15 $\pm$ 20       | B                            |
| <b>16{9}</b> |   | >50                                                              | >50            | >100                                                            | 221 $\pm$ 1                        | 10 $\pm$ 3                                            | 23 $\pm$ 15       | B                            |

<sup>a</sup>Values are the mean of three independent experiments in triplicate. <sup>b,c,d</sup>Values are means of two independent experiments in triplicate. <sup>e</sup>Values are the mean of two independent experiments in quadruplicate. <sup>f</sup>A is Friedel-Crafts acylation and B is Mannich reaction.

Table 6. Summary of the Second Generation Compounds

| No        | SRC Binding Inhibition, TR $\beta$ (IC <sub>50</sub> , $\mu$ M) <sup>a</sup> | Cell viability HepG 2 (EC <sub>50</sub> , $\mu$ M) <sup>b</sup> | TI <sup>c</sup> | Solubility ( $\mu$ M) <sup>d</sup> | Permeability (Pe, 10 <sup>-6</sup> cm/s) <sup>e</sup> | hERG <sup>f</sup> |
|-----------|------------------------------------------------------------------------------|-----------------------------------------------------------------|-----------------|------------------------------------|-------------------------------------------------------|-------------------|
| 17{1,1,1} | 1.8±0.3                                                                      | 26±2                                                            | 14              | 72±7                               | 1960±940                                              | -                 |
| 17{1,1,2} | 4.6±0.8                                                                      | 51±3                                                            | 11              | 14±1                               | 870±90                                                | -                 |
| 17{1,1,3} | 1.8±0.2                                                                      | 39±2                                                            | 21              | 10±2                               | Eq. <sup>g</sup>                                      | -                 |
| 17{1,1,4} | 4.8±0.7                                                                      | 60± 13                                                          | 13              | 36±2                               | Eq. <sup>g</sup>                                      | -                 |
| 17{1,1,5} | 1.2±0.2                                                                      | 43±2                                                            | 35              | 12±1                               | Eq. <sup>g</sup>                                      | -                 |
| 17{1,1,6} | 2.0±0.5                                                                      | 28±1                                                            | 14              | 0.6±0.1                            | Eq. <sup>g</sup>                                      | -                 |
| 17{1,2,1} | 2.6±0.5                                                                      | 31±2                                                            | 12              | 10±1                               | 600±330                                               | -                 |
| 17{1,2,2} | 5.0±0.9                                                                      | 39±2                                                            | 8               | 1±0.1                              | 370±90                                                | -                 |
| 17{1,2,3} | 0.7±0.1                                                                      | 25±2                                                            | 36              | 0.5±0.2                            | 930±150                                               | -                 |
| 17{1,2,4} | 1.2±0.2                                                                      | 47±5                                                            | 40              | 6±1                                | Und. <sup>h</sup>                                     | -                 |
| 17{1,2,5} | 0.6±0.5                                                                      | 17±2                                                            | 27              | 2±0.2                              | Eq. <sup>g</sup>                                      | -                 |
| 17{1,2,6} | 1.2±0.2                                                                      | 28±2                                                            | 23              | 0.09±0.03                          | >1                                                    | -                 |
| 17{1,3,1} | 1.5±0.2                                                                      | 89±15                                                           | 59              | 20±1                               | 1040±190                                              | -                 |
| 17{1,3,2} | 5.0±1.0                                                                      | 57±4                                                            | 11              | 2±0.3                              | 810±50                                                | -                 |
| 17{1,3,3} | 1.4±0.2                                                                      | 28±4                                                            | 20              | 1.4±0.1                            | 1770±770                                              | -                 |
| 17{1,3,4} | 2.0±0.3                                                                      | 54±11                                                           | 27              | 6±1                                | Eq. <sup>g</sup>                                      | -                 |
| 17{1,3,5} | 0.8±0.1                                                                      | 28±6                                                            | 35              | 2.7±0.4                            | 1540±760                                              | -                 |
| 17{1,3,6} | 1.7±0.2                                                                      | 31±3                                                            | 19              | 1.3±0.3                            | Eq. <sup>g</sup>                                      | -                 |
| 17{1,4,1} | 0.7±0.1                                                                      | 18±2                                                            | 26              | 2±1                                | 700±300                                               | -                 |
| 17{1,4,2} | 4.7±1.0                                                                      | 43±4                                                            | 9               | 0.3±.1                             | >1                                                    | -                 |
| 17{1,4,3} | 0.8±0.1                                                                      | 17±1                                                            | 22              | 1.4±0.2                            | >1                                                    | -                 |
| 17{1,4,4} | 1.5±0.1                                                                      | 23±3                                                            | 15              | 15±1                               | 1380±580                                              | -                 |

|           |          |       |    |           |                  |   |
|-----------|----------|-------|----|-----------|------------------|---|
| 17{1,4,5} | 0.6±0.1  | 15±1  | 25 | 1.8±0.7   | Eq. <sup>g</sup> | - |
| 17{1,4,6} | 0.8±0.2  | 18±2  | 23 | 0.7±0.7   | 860              | - |
| 17{1,5,1} | 0.7±0.1  | 17±1  | 25 | 26±19     | 650±120          | - |
| 17{1,5,2} | 6.5±1.1  | 33±1  | 5  | 14±1      | 930±500          | - |
| 17{1,5,3} | 2.0±0.3  | 31±1  | 15 | 6±1       | Eq. <sup>g</sup> | - |
| 17{1,5,4} | 18.9±3.3 | 39±2  | 2  | 16±1      | Eq. <sup>g</sup> | - |
| 17{1,5,5} | 1.9±0.3  | 34±1  | 18 | 14±2      | 1550±1080        | - |
| 17{1,5,6} | 4.0±0.8  | 39±3  | 10 | 0.2±0.1   | Eq. <sup>g</sup> | - |
| 17{2,1,1} | 1.5±0.3  | 36±4  | 24 | 2.4±0.3   | 610±100          | - |
| 17{2,1,2} | 5.4±0.8  | 55±3  | 10 | 1.2±0.1   | 500±80           | - |
| 17{2,1,3} | 0.8±0.1  | 37±2  | 45 | 0.3±0.1   | 2050±650         | - |
| 17{2,1,4} | 2.0±0.3  | 47±8  | 24 | 6±1       | 1360±310         | - |
| 17{2,1,5} | 0.6±0.1  | 31±2  | 51 | 1.3±0.1   | 1420±250         | - |
| 17{2,1,6} | 1.7±0.2  | 34±2  | 20 | 0.02±0.01 | 740±270          | - |
| 17{2,2,1} | 1.3±0.2  | 62±24 | 46 | 0.06±0.01 | 140±90           | - |
| 17{2,2,2} | 3.6±0.9  | 62±6  | 17 | 0.05±0.01 | 70±50            | - |
| 17{2,2,3} | 1.3±0.2  | 20±2  | 16 | 0.07±0.03 | 170±70           | - |
| 17{2,2,4} | 0.8±0.2  | 24±4  | 31 | 0.24±0.03 | 1600±810         | - |
| 17{2,2,5} | 0.9±0.2  | 23±2  | 25 | 0.05±0.02 | 2300±720         | - |
| 17{2,2,6} | 0.7±0.1  | 26±3  | 36 | 0.2±0.1   | 30±50            | - |
| 17{2,3,1} | 1.2±0.2  | 27±2  | 22 | 0.02±0.03 | 330±40           | - |
| 17{2,3,2} | 4.2±0.6  | 78±16 | 19 | 0.14±0.01 | 140±20           | - |
| 17{2,3,3} | 1.0±0.2  | 19±1  | 19 | 0.04±0.04 | 1310±500         | - |
| 17{2,3,4} | 0.6±0.1  | 43±12 | 68 | 0.1±0.07  | 810±480          | - |
| 17{2,3,5} | 0.8±0.1  | 24±3  | 32 | 0.05±0.03 | 1010±310         | - |



|           |          |        |     |           |                  |       |
|-----------|----------|--------|-----|-----------|------------------|-------|
| 17{2,3,6} | 0.7±0.1  | 32±3   | 44  | 0.02±0.0  | 20±10            | -     |
| 17{2,4,1} | 1.7±0.4  | 46±15  | 27  | 0.02±0.01 | 350±390          | -     |
| 17{2,4,2} | 2.4±0.4  | 29±2   | 12  | 0.05±0.02 | 190±320          | -     |
| 17{2,4,3} | 1.1±0.2  | 13±1   | 12  | 0.03±0.01 | 10±20            | -     |
| 17{2,4,4} | 1.7±0.2  | 16±3   | 10  | 1.4±0.13  | Eq. <sup>g</sup> | -     |
| 17{2,4,5} | 1.1±0.2  | 14±1   | 13  | 0.2±0.01  | 1060             | -     |
| 17{2,4,6} | 1.3±0.2  | 12±1   | 9   | 0.2±0.02  | 50±90            | -     |
| 17{2,5,1} | 1.5±0.3  | 26±1   | 18  | 2.2±0.2   | Eq. <sup>g</sup> | -     |
| 17{2,5,2} | 5.3±1.2  | 35±1   | 7   | 0.9±0.3   | 770±630          | -     |
| 17{2,5,3} | 1.6±0.3  | 35±2   | 22  | 0.8±0.1   | Eq. <sup>g</sup> | -     |
| 17{2,5,4} | 11.2±2.4 | 48±3   | 4   | 12±1      | Eq. <sup>g</sup> | -     |
| 17{2,5,5} | 0.9±0.1  | 26±2   | 29  | 2.8±0.4   | Eq. <sup>g</sup> | -     |
| 17{2,5,6} | 4.0±1.0  | 25±1   | 6   | 0.9±0.1   | 160±220          | -     |
| 17{3,1,1} | 3.6±1.0  | 66±12  | 18  | 5.5±0.6   | 380±30           | 10±18 |
| 17{3,1,2} | 2.3±0.3  | 164±1  | 73  | 26±0.3    | 160±100          | 2±14  |
| 17{3,1,3} | 0.6±0.1  | 98±16  | 177 | 38±2      | 760±70           | 48±18 |
| 17{3,1,4} | 0.7±0.1  | 99±19  | 138 | 55±5      | 240±340          | 61±5  |
| 17{3,1,5} | 0.5±0.1  | 107±25 | 202 | 44±4      | 360±60           | 45±19 |
| 17{3,1,6} | 0.4±0.1  | 100±26 | 267 | 25±1      | 300±110          | 54±20 |
| 17{3,2,1} | 2.9±0.8  | 66±11  | 23  | 3.4±0.4   | 220±90           | 2±12  |
| 17{3,2,2} | 1.2±0.8  | 82±7   | 68  | 10±0.2    | 440±110          | 14±9  |
| 17{3,2,3} | 0.7±0.2  | 56±9   | 79  | 10±1      | 560±80           | 4±12  |
| 17{3,2,4} | 0.8±0.1  | 92±16  | 118 | 31±3      | 1100±610         | 6±13  |
| 17{3,2,5} | 1.0±0.2  | 97±15  | 96  | 20±1      | 770±550          | -7±5  |
| 17{3,2,6} | 0.9±0.1  | 73±10  | 81  | 4.7±0.1   | 380±220          | 4±13  |

|           |         |        |     |         |                   |       |
|-----------|---------|--------|-----|---------|-------------------|-------|
| 17{3,3,1} | 2.1±0.5 | 63±9   | 30  | 7.2±0.5 | 90±30             | 1±6   |
| 17{3,3,2} | 1.7±0.2 | 152±29 | 90  | 7.3±0.7 | 260±30            | 11±6  |
| 17{3,3,3} | 0.9±0.2 | 72±22  | 79  | 13±2    | 680±200           | 15±16 |
| 17{3,3,4} | 0.6±0.1 | 101±20 | 166 | 36±1    | 540±180           | 3±14  |
| 17{3,3,5} | 0.8±0.1 | 87±20  | 104 | 19±2    | 670±80            | 1±6   |
| 17{3,3,6} | 0.8±0.1 | 60±11  | 74  | 5.5±0.3 | 730±280           | -7±12 |
| 17{3,4,1} | 1.1±0.2 | 54±10  | 50  | 6.5±0.6 | 170±160           | -5±17 |
| 17{3,4,2} | 2.1±0.3 | 57±8   | 28  | 22±4    | 980±530           | 5±17  |
| 17{3,4,3} | 0.8±0.2 | 39±3   | 47  | 4±1     | 470±120           | 9±14  |
| 17{3,4,4} | 1.0±0.2 | 61±13  | 62  | 26±1    | 430±100           | 5±13  |
| 17{3,4,5} | 0.7±0.1 | 43±8   | 62  | 14±1    | 480±50            | 4±10  |
| 17{3,4,6} | 0.8±0.2 | 32±3   | 38  | 6±1     | Und. <sup>h</sup> | 13±12 |
| 17{3,5,1} | 1.1±0.2 | 29±2   | 28  | 47±10   | 1880±910          | 26±11 |
| 17{3,5,2} | 3.5±0.3 | 35±3   | 10  | 21±1    | 1200±370          | 18±10 |
| 17{3,5,3} | 0.9±0.1 | 32±3   | 36  | 27±1    | 1140±170          | 36±11 |
| 17{3,5,4} | 5.4±0.4 | 50±6   | 9   | 27±1    | 480±120           | 18±12 |
| 17{3,5,5} | 1.2±0.1 | 28±3   | 24  | 28±1    | 470±80            | 32±8  |
| 17{3,5,6} | 1.5±0.1 | 38±5   | 26  | 30±2    | 1010±410          | 20±15 |

<sup>a</sup>Values are the mean of three independent experiments in triplicate. <sup>b</sup>Values are means of two independent experiments in triplicate. <sup>c</sup>Values are EC<sub>50</sub> over IC<sub>50</sub>. <sup>d,e</sup>Values are the mean in triplicate. <sup>f</sup>Values are the mean of two independent experiments in quadruplicate. <sup>g</sup>Equilibration. <sup>h</sup>Undetected.

**Chemistry.** All materials were obtained from commercial suppliers and used without further purification. All solvents used were dried using an aluminum oxide column. Thin-layer chromatography was performed on pre-coated silica gel 60 F254 plates. Purification of compounds was carried out by normal phase column chromatography (SP1 [Biotage], Silica gel 230-400 mesh) followed by evaporation (HT-4X evaporator [Genevac]). Initiator [Biotage] was used for microwave reaction.

Chromatographic separation was performed using a UPLC-MS (BEH C18 1.7  $\mu$ , 2.1 x 50 mm column, Waters Corp.). Data were acquired using Masslynx v.4.1 and analyzed using the Openlynx software suite. The flow was then split to an evaporative light scattering detector (ELSD) and SQ mass spectrometer. The total flow rate was 1.0 mL/min and gradient program started at 90% A (0.1% formic acid in H<sub>2</sub>O), changed to 95 % B (0.1% formic acid in ACN), then to 90% A. The mass spectrometer was operated in positive-ion mode with electrospray ionization. The conditions were as follows: capillary voltage 3.4 kV, cone voltage 30 V, source temperature 130 °C, desolvation temperature 400 °C, desolvation gas 800 L/hr, cone gas 100 L/hr. A full scan range from m/z = 110-1000 in 0.2 s was used to acquire MS data. The ELSD-drift tube temperature was set at 52 °C

NMR spectra are recorded on a Bruker 400 MHz and referenced internally to the residual resonance in CDCl<sub>3</sub> ( $\delta$  7.26 ppm) for hydrogen and ( $\delta$  = 77 ppm) for carbon atoms. NMR peaks were assigned by MestRec (4.9.9.6) and MestReNova (5.2.2)

i) Friedel-Crafts Acylation

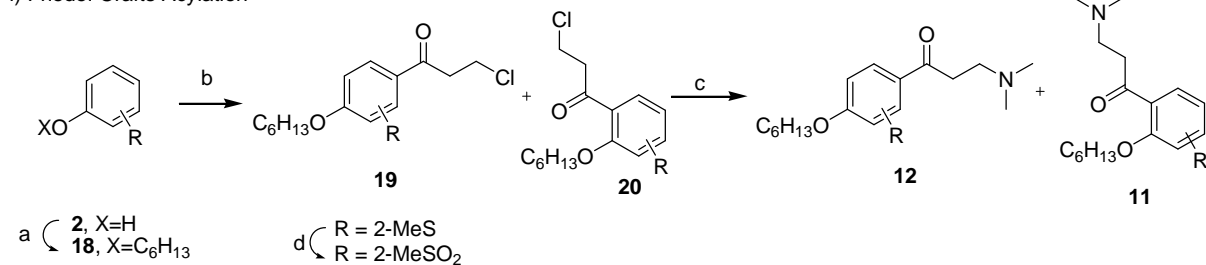

ii) Mannich Reaction

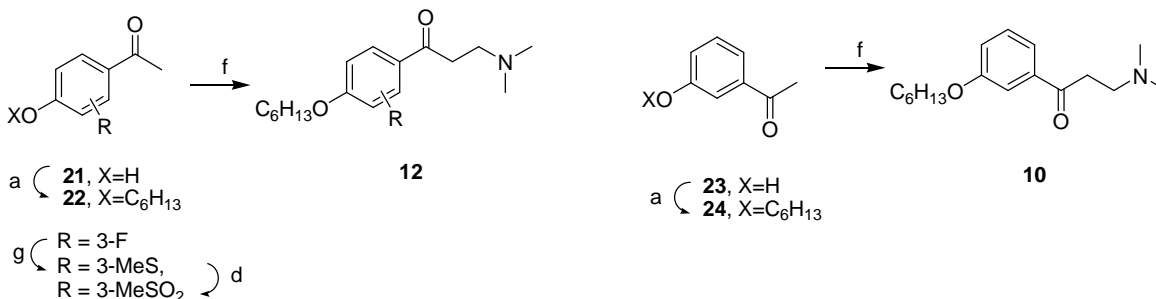

*Reagent and condition.* (a) Hexyl bromide,  $\text{K}_2\text{CO}_3$ , DMF, 80-90 °C, 12 h; (b) 2-Chloropropyl chloride,  $\text{AlCl}_3$ , DCM, 0 °C; (c) 2 M dimethylamine/THF, THF, rt, 30 min; (d) *m*CPBA, DCM, 0 °C, 1 h; (e) dimethylamine hydrochloride, DMF, MW, 110 °C, 1 h (f) paraformaldehyde, dimethylamine hydrochloride, *c*-HCl,  $\text{H}_2\text{O}/\text{MeCN}$  (1/9, v/v), MW, 120 °C, 2 h; (g) NaSMe, DMF, rt, 1 h.

**General procedure for 18 and 22:** To a solution the corresponding phenol **2** or **21** (5.3 mmol, 1 eq.) in DMF was added  $\text{K}_2\text{CO}_2$  (10.6 mmol, 2 eq.) and n-hexylbromide (8.0 mmol, 1.5 eq.), and then stirred at 85 °C for overnight. The reaction mixture was poured to water and extracted with  $\text{Et}_2\text{O}$ . The combined organic layer were washed with brine and dried over  $\text{MgSO}_4$  and concentrated *in vacuo* to yield crude compound **18** or **22**. The crude product **18** or **22** was used for next step without any purification. **Hexyloxybenzene 18.**  $^1\text{H}$  NMR (400 MHz,  $\text{CDCl}_3$ )  $\delta$  7.28 (m, 2H), 6.92

(m, 2H), 3.96 (t, 2H,  $J = 6.6$  Hz), 1.79 (m, 2H), 1.47 (m, 2H), 1.35 (m, 4H), 0.91 (t, 3H,  $J = 8.0$  Hz);  
159.11, 129.36, 120.41, 114.47, 67.85, 31.59, 29.26, 25.73, 22.60, 14.02.

**1-(Hexyloxy)-2-methylbenzene 18{1}**.  $^1\text{H}$  NMR (400 MHz,  $\text{CDCl}_3$ )  $\delta$  7.14 (m, 2H), 6.83 (m, 2H), 3.96 (t, 2H,  $J = 6.4$  Hz), 2.23 (s, 3H), 1.80 (m, 2H), 1.47 (m, 2H), 1.36 (m, 4H), 0.92 (m, 3H);  
 $^{13}\text{C}$  NMR (100 MHz,  $\text{CDCl}_3$ )  $\delta$  157.25, 130.52, 126.82, 126.65, 120.00, 110.91, 67.88, 31.58, 29.34, 25.82, 22.61, 16.20, 14.01.

**1-(Hexyloxy)-3-methylbenzene 18{2}**.  $^1\text{H}$  NMR (400 MHz,  $\text{CDCl}_3$ )  $\delta$  7.17 (t, 1H,  $J = 7.8$  Hz), 6.74 (m, 3H), 3.95 (m, 2H), 2.34 (m, 3H), 1.78 (m, 2H), 1.47 (m, 2H), 1.35 (m, 4H), 0.92 (t, 3H,  $J = 7.0$  Hz);  $^{13}\text{C}$  NMR (100 MHz,  $\text{CDCl}_3$ )  $\delta$  159.14, 139.36, 129.10, 121.24, 115.35, 111.31, 67.80, 31.59, 29.29, 25.74, 22.60, 21.50, 14.02.

**1-(Hexyloxy)-3-methoxybenzene 18{4}**.  $^1\text{H}$  NMR (400 MHz,  $\text{CDCl}_3$ )  $\delta$  7.17 (t, 1H,  $J = 8.2$  Hz), 6.49 (m, 3H), 3.94 (t, 2H,  $J = 6.6$  Hz), 3.79 (s, 3H), 1.77 (m, 2H), 1.45 (m, 2H), 1.34 (m, 4H), 0.91 (t, 3H,  $J = 6.8$  Hz);  $^{13}\text{C}$  NMR (100 MHz,  $\text{CDCl}_3$ )  $\delta$  160.81, 160.41, 129.78, 106.70, 106.08, 100.94, 68.00, 55.24, 31.58, 29.23, 25.73, 22.59, 14.02.

**1-tert-Butyl-2-(hexyloxy)benzene 18{8}**.  $^1\text{H}$  NMR (400 MHz,  $\text{CDCl}_3$ )  $\delta$  7.30 (m, 1H), 7.18 (m, 1H), 6.89 (t, 2H,  $J = 7.7$  Hz), 4.00 (t, 2H,  $J = 6.5$  Hz), 1.87 (m, 2H), 1.54 (m, 2H), 1.41 (m, 13H), 0.94 (t, 3H,  $J = 7.0$ );  $^{13}\text{C}$  NMR (100 MHz,  $\text{CDCl}_3$ )  $\delta$  157.89, 137.95, 126.90, 126.50, 119.90, 111.72, 67.67, 34.82, 31.54, 29.77, 29.44, 26.04, 22.57, 14.00.

**1-Fluoro-2-(hexyloxy)benzene 18{9}**.  $^1\text{H}$  NMR (400 MHz,  $\text{CDCl}_3$ )  $\delta$  7.05 (m, 2H), 6.96 (m, 1H), 6.87 (m, 1H), 4.03 (t, 2H,  $J = 6.6$  Hz), 1.82 (m, 2H), 1.47 (m, 2H), 1.33 (m, 4H), 0.90 (m, 3H).

**1-Chloro-2-(hexyloxy)benzene 18{10}**.  $^1\text{H}$  NMR (400 MHz,  $\text{CDCl}_3$ )  $\delta$  7.35 (m, 1H), 7.19 (m, 1H), 6.89 (m, 2H), 4.02 (t, 2H,  $J = 6.6$  Hz), 1.84 (m, 2H), 1.50 (m, 2H), 1.36 (m, 4H), 0.91 (t, 3H,  $J = 8.0$  Hz);  $^{13}\text{C}$  NMR (100 MHz,  $\text{CDCl}_3$ )  $\delta$  154.62, 130.20, 127.58, 122.92, 121.05, 113.36, 69.10, 31.52, 29.07, 25.62, 22.57, 14.01.

**1-Chloro-3-(hexyloxy)benzene 18{11}**.  $^1\text{H}$  NMR (400 MHz,  $\text{CDCl}_3$ )  $\delta$  7.20 (t, 1H,  $J = 8.1$  Hz), 6.93 (m, 2H), 6.80 (m, 1H), 3.96 (t, 2H,  $J = 6.6$  Hz), 1.79 (m, 2H), 1.47 (m, 2H), 1.36 (m, 4H), 0.93 (t, 3H,  $J = 6.7$ );  $^{13}\text{C}$  NMR (100 MHz,  $\text{CDCl}_3$ )  $\delta$  159.91, 134.78, 130.11, 120.59, 114.82, 113.06, 68.24, 31.53, 29.10, 25.66, 22.58, 14.01.

**1-Bromo-2-(hexyloxy)benzene 18{12}**.  $^1\text{H}$  NMR (400 MHz,  $\text{CDCl}_3$ )  $\delta$  7.53 (dd, 1H,  $J = 1.6, 7.9$  Hz), 7.23 (m, 1H), 6.88 (m, 1H), 6.81 (m, 1H), 4.02 (t, 2H,  $J = 6.5$ ), 1.84 (m, 2H), 1.51 (m, 2H), 1.35 (m, 4H), 0.91 (m, 3H);  $^{13}\text{C}$  NMR (100 MHz,  $\text{CDCl}_3$ )  $\delta$  155.47, 133.28, 128.33, 121.55, 113.19, 112.25, 77.31, 77.00, 76.68, 69.14, 31.50, 29.05, 25.65, 22.57, 14.01.

**1-Bromo-3-(hexyloxy)benzene 18{13}**.  $^1\text{H}$  NMR (400 MHz,  $\text{CDCl}_3$ )  $\delta$  7.13 (dd, 1H,  $J = 6.9, 9.6$  Hz), 7.06 (m, 2H), 6.82 (m, 1H), 3.93 (t, 2H,  $J = 6.6$  Hz), 1.77 (m, 2H), 1.44 (m, 2H), 1.34 (m, 4H), 0.91 (t, 3H,  $J = 6.8$  Hz);  $^{13}\text{C}$  NMR (100 MHz,  $\text{CDCl}_3$ )  $\delta$  159.95, 130.44, 123.51, 122.75, 117.71, 113.55, 68.25, 31.53, 29.09, 25.65, 22.57, 14.01.

**1-(Hexyloxy)-2-iodobenzene 18{14}**.  $^1\text{H}$  NMR (400 MHz,  $\text{CDCl}_3$ )  $\delta$  7.77 (dd, 1H,  $J = 1.6, 7.8$  Hz), 7.28 (m, 1H), 6.80 (m, 1H), 6.69 (m, 1H), 3.99 (m, 2H), 1.84 (m, 2H), 1.53 (m, 2H), 1.37 (m, 4H), 0.92 (m, 3H);  $^{13}\text{C}$  NMR (100 MHz,  $\text{CDCl}_3$ )  $\delta$  157.61, 139.36, 129.33, 122.23, 112.06, 86.71, 69.16, 31.48, 29.05, 25.74, 22.57, 14.02.

**1-(Hexyloxy)-3-iodobenzene 18{15}**.  $^1\text{H}$  NMR (400 MHz,  $\text{CDCl}_3$ )  $\delta$  7.26 (m, 2H), 6.99 (t, 1H,  $J = 7.9$  Hz), 6.86 (m, 1H), 3.92 (t, 2H,  $J = 6.5$  Hz), 1.77 (m, 2H), 1.46 (m, 2H), 1.34 (m, 4H), 0.92 (m, 3H);  $^{13}\text{C}$  NMR (100 MHz,  $\text{CDCl}_3$ )  $\delta$  159.72, 130.68, 129.57, 123.61, 114.21, 94.33, 68.17, 31.52, 29.10, 25.65, 22.57, 14.01.

**(2-(Hexyloxy)phenyl)(methyl)sulfane 18{16}**.  $^1\text{H}$  NMR (400 MHz,  $\text{CDCl}_3$ )  $\delta$  7.11 (m, 2H), 6.93 (m, 1H), 6.81 (m, 1H), 4.01 (t, 2H,  $J = 6.6$  Hz), 2.41 (s, 3H), 1.82 (m, 2H), 1.49 (m, 2H), 1.33 (m, 4H), 0.90 (m, 3H);  $^{13}\text{C}$  NMR (100 MHz,  $\text{CDCl}_3$ )  $\delta$  155.76, 127.26, 125.83, 125.67, 120.96, 111.10, 68.64, 31.55, 29.17, 25.72, 22.58, 14.56, 14.02.

**3-Chloro-1-(4-(hexyloxy)-2,6-dimethylphenyl)propan-1-one 18{22}**.  $^1\text{H}$  NMR (400 MHz,  $\text{CDCl}_3$ )  $\delta$  6.54 (s, 1H), 3.93 (t,  $J = 6.6$ , 1H), 2.28 (t,  $J = 3.6$ , 3H), 1.82 – 1.70 (m, 1H), 1.53 – 1.40 (m, 1H), 1.40 – 1.28 (m, 2H), 0.92 (dd,  $J = 4.5, 9.6$ , 2H).

**2-(Hexyloxy)biphenyl 18{27}**.  $^1\text{H}$  NMR (400 MHz,  $\text{CDCl}_3$ )  $\delta$  7.56 (m, 2H), 7.40 (m, 2H), 7.31 (m, 3H), 7.01 (m, 2H), 3.96 (t, 2H,  $J = 6.5$  Hz), 1.71 (m, 2H), 1.39 (m, 2H), 1.28 (m, 4H), 0.88 (t, 3H,  $J = 6.9$  Hz);  $^{13}\text{C}$  NMR (100 MHz,  $\text{CDCl}_3$ )  $\delta$  156.03, 138.62, 130.92, 130.82, 129.59, 128.49, 127.75, 126.68, 120.69, 112.50, 68.42, 31.43, 29.12, 25.72, 22.56, 13.97.

**1-Benzyl-2-(hexyloxy)benzene 18{28}**  $^1\text{H}$  NMR (400 MHz,  $\text{CDCl}_3$ )  $\delta$  7.26 (m, 4H), 7.19 (m, 2H), 7.11 (m, 1H), 6.88 (m, 2H), 4.00 (s, 2H), 3.96 (t, 2H,  $J = 6.4$  Hz), 1.77 (m, 2H), 1.44 (m, 2H), 1.33 (m, 4H), 0.92 (m, 3H);  $^{13}\text{C}$  NMR (100 MHz,  $\text{CDCl}_3$ )  $\delta$  156.83, 141.20, 130.31, 129.79, 128.94, 128.14, 127.32, 125.66, 120.16, 111.17, 67.87, 36.13, 31.56, 29.31, 25.79, 22.59, 14.03.

**General procedure for 19 and 20:** To a solution phenol **18** (0.50 g, 2.81 mmol) in DCM was added 3-chloropropanoic chloride (0.35 mL, 3.65 mmol) and AlCl<sub>3</sub> (0.49 g, 3.65 mmol) at 0 °C and stirred for 1 h. The reaction mixture was poured into ice water and extracted with DCM. The combined organic layer were washed with brine and dried over MgSO<sub>4</sub> and concentrated in vacuo to yield crude compound **19**. **3-Chloro-1-(4-(hexyloxy)phenyl)propan-1-one 19**. White solid; 82% yield; <sup>1</sup>H NMR (400 MHz, CDCl<sub>3</sub>) δ 7.95 (d, 1H, *J* = 8.9 Hz), 6.95 (d, 1H, *J* = 8.9 Hz), 4.04 (t, 1H, *J* = 6.6 Hz), 3.94 (t, 1H, *J* = 6.9 Hz), 3.42 (t, 1H, *J* = 6.9 Hz), 1.82 (m, 1H), 1.49 (m, 1H), 1.37 (m, 2H), 0.93 (t, 2H, *J* = 7.0 Hz); <sup>13</sup>C NMR (100 MHz, CDCl<sub>3</sub>) δ 238.90, 214.67, 182.95, 149.81, 148.72, 133.79, 87.80, 60.36, 58.47, 50.98, 48.50, 45.10, 42.03, 33.47

**3-Chloro-1-(4-(hexyloxy)-3-methylphenyl)propan-1-one 19{1}**. Yield 58%; <sup>1</sup>H NMR (400 MHz, CDCl<sub>3</sub>) δ 7.79 (m, 2H), 6.83 (d, 1H, *J* = 8.5 Hz), 4.03 (t, 2H, *J* = 6.4 Hz), 3.91 (t, 2H, *J* = 7.0 Hz), 3.40 (t, 2H, *J* = 6.9 Hz), 2.25 (s, 3H), 1.82 (m, 2H), 1.49 (M, 2H), 1.35 (m, 4H), 0.91 (t, 3H, *J* = 7.1 Hz); <sup>13</sup>C NMR (100 MHz, CDCl<sub>3</sub>) δ 195.47, 161.70, 130.60, 128.70, 128.17, 127.09, 110.02, 68.24, 40.85, 39.12, 31.48, 29.05, 25.70, 22.56, 16.25, 13.97.

**3-Chloro-1-(4-(hexyloxy)-2-methylphenyl)propan-1-one 19{2}**. Yield 52%; <sup>1</sup>H NMR (400 MHz, CDCl<sub>3</sub>) δ 7.72 (d, 1H, *J* = 9.4 Hz), 6.76 (m, 2H), 4.00 (m, 2H), 3.89 (t, 2H, *J* = 6.8 Hz), 3.37 (t, 2H, *J* = 6.8 Hz), 2.56 (s, 3H), 1.79 (m, 2H), 1.55 (s, 1H), 1.46 (s, 2H), 1.35 (m, 4H), 0.91 (t, 3H, *J* = 6.9 Hz); <sup>13</sup>C NMR (100 MHz, CDCl<sub>3</sub>) δ 197.83, 161.86, 142.57, 131.77, 128.89, 118.18, 111.15, 77.31, 77.00, 76.68, 68.10, 43.02, 39.39, 31.53, 31.52, 29.06, 25.64, 22.57, 22.50, 14.01,



**1-(3-*tert*-Butyl-4-(hexyloxy)phenyl)prop-2-en-1-one 19{8}**. This compound was shown enone as a major product and chloroketone as a minor product in crude NMR. The crude mixture was reacted with DBU to give eliminated product enone. Two step yield 18%, para/meta=49/51;  $^1\text{H}$  NMR (400 MHz,  $\text{CDCl}_3$ )  $\delta$  7.61 (d, 1H,  $J = 2.5$  Hz), 7.45 (dd, 1H,  $J = 2.6, 8.7$  Hz), 7.09 (m, 1H), 6.87 (d, 1H,  $J = 8.7$  Hz), 6.29 (m, 1H,  $J = 1.8, 17.2$  Hz), 5.73 (dd, 1H,  $J = 1.8, 10.4$  Hz), 4.00 (t, 2H,  $J = 6.4$  Hz), 1.77 (m, 2H), 1.44 (s, 3H), 1.31 (m, 14H), 0.91 (d, 3H,  $J = 7.0$  Hz);  $^{13}\text{C}$  NMR (100 MHz,  $\text{CDCl}_3$ )  $\delta$  189.67, 162.09, 138.27, 132.38, 129.30, 128.93, 128.73, 127.72, 111.10, 68.23, 35.01, 31.45, 29.57, 29.18, 25.94, 22.51, 13.96,

**3-Chloro-1-(4-(hexyloxy)-2-methoxyphenyl)propan-1-one 19{4}**. Yield 16%;  $^1\text{H}$  NMR (400 MHz,  $\text{CDCl}_3$ )  $\delta$  7.84 (d, 1H,  $J = 8.8$  Hz), 6.52 (dd, 1H,  $J = 2.2, 8.8$  Hz), 6.45 (d, 1H,  $J = 2.2$  Hz), 4.00 (t, 2H,  $J = 6.6$  Hz), 3.87 (m, 5H), 3.43 (t, 2H,  $J = 6.9$  Hz), 1.79 (m, 2H), 1.46 (m, 2H), 1.34 (m, 4H), 0.91 (t, 3H,  $J = 6.9$  Hz);  $^{13}\text{C}$  NMR (100 MHz,  $\text{CDCl}_3$ )  $\delta$  196.07, 164.50, 161.07, 132.80, 119.88, 105.85, 98.64, 68.34, 55.43, 46.42, 39.44, 31.49, 29.04, 25.60, 22.53, 13.97,

**3-Chloro-1-(4-(hexyloxy)-3-(methylthio)phenyl)propan-1-one 19{5}**. Yield 59%;  $^1\text{H}$  NMR (400 MHz,  $\text{CDCl}_3$ )  $\delta$  7.75 (d, 1H,  $J = 2.0$  Hz), 7.71 (dd, 1H,  $J = 2.1, 8.5$  Hz), 6.82 (d, 1H,  $J = 8.5$  Hz), 4.08 (t, 2H,  $J = 6.5$  Hz), 3.90 (t, 2H,  $J = 6.9$  Hz), 3.40 (m, 2H), 2.45 (m, 3H), 1.85 (m, 2H), 1.50 (m, 2H), 1.33 (m, 4H), 0.89 (t, 3H,  $J = 7.1$  Hz)

**3-Chloro-1-(2-fluoro-4-(hexyloxy)phenyl)propan-1-one 19{7}**. Yield 34%;  $^1\text{H}$  NMR (400 MHz,  $\text{CDCl}_3$ )  $\delta$  7.89 (t, 1H,  $J = 8.8$  Hz), 6.75 (dd, 1H,  $J = 2.4, 8.9$  Hz), 6.60 (dd, 1H,  $J = 2.3, 13.4$  Hz), 4.00 (t, 2H,  $J = 6.6$  Hz), 3.89 (m, 2H), 3.42 (m, 2H), 1.80 (m, 2H), 1.46 (m, 2H), 1.34 (m, 4H), 0.91

(t, 3H,  $J = 7.1$  Hz);  $^{13}\text{C}$  NMR (100 MHz,  $\text{CDCl}_3$ )  $\delta$  194.32, 158.78, 130.38, 129.62, 128.44, 123.33, 112.14, 77.31, 77.00, 76.68, 69.42, 40.88, 38.70, 31.43, 28.82, 25.53, 22.53, 13.98.

**3-Chloro-1-(3-fluoro-4-(hexyloxy)phenyl)propan-1-one 19{9}**. Yield 91%;  $^1\text{H}$  NMR (400 MHz,  $\text{CDCl}_3$ )  $\delta$  7.70 (m, 2H), 6.99 (t, 1H,  $J = 8.4$  Hz), 4.10 (m, 2H), 3.90 (t, 2H,  $J = 6.8$  Hz), 3.38 (t, 1H,  $J = 6.8$  Hz), 1.84 (m, 2H), 1.47 (m, 2H), 1.33 (m, 5H), 0.90 (m, 3H)

**3-Chloro-1-(3-chloro-4-(hexyloxy)phenyl)propan-1-one 19{10}**. Yield 92%;  $^1\text{H}$  NMR (400 MHz,  $\text{CDCl}_3$ )  $\delta$  7.99 (d, 1H,  $J = 2.2$  Hz), 7.85 (dd, 1H,  $J = 2.2, 8.6$  Hz), 6.95 (d, 1H,  $J = 8.6$  Hz), 4.10 (t, 2H,  $J = 6.5$  Hz), 3.91 (t, 2H,  $J = 6.8$  Hz), 3.39 (t, 2H,  $J = 6.8$  Hz), 1.87 (m, 2H), 1.52 (m, 2H), 1.36 (m, 4H), 0.91 (t, 3H,  $J = 7.0$  Hz);  $^{13}\text{C}$  NMR (100 MHz,  $\text{CDCl}_3$ )  $\delta$  194.32, 158.78, 130.38, 129.62, 128.44, 123.33, 112.14, 77.31, 77.00, 76.68, 69.42, 40.88, 38.70, 31.43, 28.82, 25.53, 22.53, 13.98,

**3-Chloro-1-(2-chloro-4-(hexyloxy)phenyl)propan-1-one 19{11}**. Beta-chloro/enone 1:0.7 Yield 14%;  $^1\text{H}$  NMR (400 MHz,  $\text{CDCl}_3$ )  $\delta$  7.65 (d, 1H,  $J = 8.7$  Hz), 6.93 (d, 1H,  $J = 3.2$  Hz), 6.83 (m, 1H), 3.99 (t, 2H,  $J = 6.5$  Hz), 3.89 (m, 2H), 3.46 (t, 2H,  $J = 6.7$  Hz), 1.79 (m, 2H), 1.46 (m, 2H), 1.34 (m, 4H), 0.91 (t, 3H,  $J = 6.7$  Hz);  $^{13}\text{C}$  NMR (100 MHz,  $\text{CDCl}_3$ )  $\delta$  197.19, 162.22, 136.04, 133.75, 132.01, 130.28, 116.63, 113.34, 68.67, 45.13, 38.99, 31.47, 28.92, 25.57, 22.56, 14.00,

**1-(3-Bromo-4-(hexyloxy)phenyl)-3-chloropropan-1-one 19{12}**. Yield 90%;  $^1\text{H}$  NMR (400 MHz,  $\text{CDCl}_3$ )  $\delta$  8.16 (d, 1H,  $J = 2.2$  Hz), 7.89 (dd, 1H,  $J = 2.2, 8.6$  Hz), 6.91 (d, 1H,  $J = 8.7$  Hz), 4.10 (t, 2H,  $J = 6.5$  Hz), 3.90 (t, 2H,  $J = 6.8$  Hz), 3.38 (t, 2H,  $J = 6.8$  Hz), 1.86 (m, 2H), 1.53 (m, 2H), 1.36 (m, 4H), 0.91 (t, 3H,  $J = 7.0$  Hz);  $^{13}\text{C}$  NMR (100 MHz,  $\text{CDCl}_3$ )  $\delta$  194.19, 159.60, 133.56, 130.08, 129.16, 112.45, 111.96, 77.31, 77.00, 76.68, 69.49, 40.87, 38.70, 31.41, 28.81, 25.55, 22.52, 13.98,

**1-(2-Bromo-4-(hexyloxy)phenyl)-3-chloropropan-1-one 19{13}**. Beta-chloro/eneone 0.8/1 Yield 9%;  $^1\text{H}$  NMR (400 MHz,  $\text{CDCl}_3$ )  $\delta$  7.56 (d, 1H,  $J = 8.7$  Hz), 7.40 (d, 1H,  $J = 8.6$  Hz), 7.14 (s, 1H), 6.87 (d, 1H,  $J = 8.6$  Hz), 3.98 (t, 2H,  $J = 6.5$  Hz), 3.88 (t, 2H,  $J = 6.7$  Hz), 3.43 (t, 2H,  $J = 6.9$  Hz), 1.78 (m, 2H), 1.45 (m, 2H), 1.34 (m, 4H), 0.91 (t, 3H,  $J = 6.9$  Hz).

**3-Chloro-1-(4-(hexyloxy)-3-iodophenyl)propan-1-one 19{14}**. Yield 56%;  $^1\text{H}$  NMR (400 MHz,  $\text{CDCl}_3$ )  $\delta$  8.38 (d, 1H,  $J = 2.2$  Hz), 7.93 (dd, 1H,  $J = 2.2, 8.6$  Hz), 6.82 (d, 1H,  $J = 8.7$  Hz), 4.09 (t, 2H,  $J = 6.4$  Hz), 3.90 (t, 2H,  $J = 6.8$  Hz), 3.38 (t, 2H,  $J = 6.8$  Hz), 1.86 (m, 2H), 1.54 (d, 2H,  $J = 5.5$  Hz), 1.36 (m, 4H), 0.92 (t, 3H,  $J = 7.0$  Hz);  $^{13}\text{C}$  NMR (100 MHz,  $\text{CDCl}_3$ )  $\delta$  194.04, 161.67, 139.81, 130.77, 130.19, 110.88, 86.60, 69.60, 40.87, 38.72, 31.40, 28.83, 25.65, 22.54, 13.99,

**3-Chloro-1-(4-(hexyloxy)-2-iodophenyl)propan-1-one 19{15}**. beta-chloro/eneone 1/0.7 Yield 11%;  $^1\text{H}$  NMR (400 MHz,  $\text{CDCl}_3$ )  $\delta$  7.54 (d, 1H,  $J = 8.7$  Hz), 7.50 (d, 1H,  $J = 2.5$  Hz), 6.91 (m, 1H), 3.97 (m, 2H), 3.88 (t, 2H,  $J = 6.8$  Hz), 3.38 (t, 2H,  $J = 6.8$  Hz), 1.78 (m, 2H), 1.45 (m, 2H), 1.33 (m, 4H), 0.90 (t, 3H,  $J = 6.9$  Hz);  $^{13}\text{C}$  NMR (100 MHz,  $\text{CDCl}_3$ )  $\delta$  204.20, 167.94, 141.77, 137.15, 134.27, 133.18, 120.45, 99.61, 75.05, 49.78, 45.47, 37.93, 35.41, 32.03, 29.01, 20.46.

**General procedure for oxidation of thioether to sulfonyl compound- Synthesis of compound 21{16}** To a solution of **19{5}** in DCM was added *m*CPBA (2.2 eq) at 0 °C and stirred for 1 h. The reaction mixture was poured to water and extracted with DCM. The combined organic layer was washed with  $\text{NaHCO}_3$  and brine, dried over  $\text{MgSO}_4$ , and concentrated *in vacuo* to yield the corresponding sulfonyl compound. **3-Chloro-1-(4-(hexyloxy)-3-(methylsulfonyl)phenyl)propan-1-one 19{16}**.  $^1\text{H}$  NMR (400 MHz,  $\text{CDCl}_3$ )  $\delta$  8.51 (d, 1H,  $J = 2.3$  Hz), 8.21 (dd, 1H,  $J = 2.3, 8.8$

Hz), 7.11 (d, 1H,  $J = 8.8$  Hz), 4.22 (t, 2H,  $J = 6.6$  Hz), 3.89 (t, 2H,  $J = 6.6$  Hz), 3.43 (t, 2H,  $J = 6.6$  Hz), 3.23 (s, 3H), 1.90 (m, 2H), 1.50 (m, 2H), 1.34 (m, 4H), 0.89 (m, 3H).

**3-Chloro-1-(4-(hexyloxy)-2,6-dimethylphenyl)propan-1-one 19{22}**. Beta-chloro/enone 1/1  
Yield 10%;  $^1\text{H}$  NMR (400 MHz,  $\text{CDCl}_3$ )  $\delta$  6.55 (s, 2H), 3.93 (m, 2H), 3.86 (m, 2H), 3.16 (t, 2H,  $J = 6.5$  Hz), 2.23 (s, 6H), 2.15 (s, 6H), 1.76 (m, 2H), 1.45 (m, 2H), 1.34 (m, 4H), 0.91 (t, 3H,  $J = 7.1$  Hz)

**3-Chloro-1-(6-(hexyloxy)biphenyl-3-yl)propan-1-one 19{27}**.  $^1\text{H}$  NMR (400 MHz,  $\text{CDCl}_3$ )  $\delta$  7.95 (m, 2H), 7.54 (m, 2H), 7.42 (dd, 2H,  $J = 6.9, 7.6$  Hz), 7.36 (dd, 1H,  $J = 4.6, 11.4$  Hz), 7.01 (m, 1H), 4.06 (t, 2H,  $J = 6.5$  Hz), 3.93 (t, 2H,  $J = 6.9$  Hz), 3.44 (t, 2H,  $J = 6.9$  Hz), 1.75 (m, 2H), 1.40 (m, 2H), 1.29 (m, 4H), 0.88 (t, 3H,  $J = 6.8$  Hz);  $^{13}\text{C}$  NMR (100 MHz,  $\text{CDCl}_3$ )  $\delta$  195.29, 160.33, 137.42, 131.17, 130.89, 129.49, 129.41, 129.23, 127.96, 127.31, 111.55, 68.64, 40.93, 39.01, 31.33, 28.83, 25.60, 22.50, 13.93.

**1-(3-Benzyl-4-(hexyloxy)phenyl)-3-chloropropan-1-one 19{28}**.  $^1\text{H}$  NMR (400 MHz,  $\text{CDCl}_3$ )  $\delta$  7.83 (dd, 1H,  $J = 2.3, 8.6$  Hz), 7.77 (d, 1H,  $J = 2.2$  Hz), 7.27 (m, 2H), 7.19 (m, 3H), 6.87 (d, 1H,  $J = 8.6$  Hz), 4.01 (m, 4H), 3.89 (t, 2H,  $J = 6.9$  Hz), 3.37 (t, 2H,  $J = 6.9$  Hz), 1.77 (m, 2H), 1.40 (m, 2H), 1.31 (m, 4H), 0.90 (t, 3H,  $J = 6.6$  Hz);  $^{13}\text{C}$  NMR (100 MHz,  $\text{CDCl}_3$ )  $\delta$  195.34, 161.29, 140.23, 130.54, 130.10, 128.90, 128.77, 128.28, 126.00, 110.55, 68.33, 40.83, 39.04, 36.26, 31.48, 29.03, 25.66, 22.54, 14.00.

**3-Chloro-1-(2-(hexyloxy)-4-methylphenyl)propan-1-one 20**. Yield 36%;  $^1\text{H}$  NMR (400 MHz,  $\text{CDCl}_3$ )  $\delta$  7.71 (d, 1H,  $J = 7.9$  Hz), 6.80 (d, 1H,  $J = 7.9$  Hz), 6.75 (s, 1H), 4.06 (t, 2H,  $J = 6.5$  Hz),

3.86 (m, 2H), 3.49 (t, 2H,  $J = 7.0$  Hz), 2.36 (s, 3H), 1.86 (m, 2H), 1.50 (m, 2H), 1.36 (m, 4H), 0.91 (m, 3H);  $^{13}\text{C}$  NMR (100 MHz,  $\text{CDCl}_3$ )  $\delta$  217.21, 178.24, 164.84, 150.21, 143.85, 140.93, 132.38, 88.03, 66.35, 58.85, 50.99, 48.66, 45.46, 42.04, 41.37, 33.49.

**General procedure for 11 and 12:** To a solution compound **19** or **20** in THF was added 1 M dimethylamine solution (5 eq.) in THF and stirred at rt for 1 h. The reaction mixture was subjected to empty SPE cartridge to filter solid HCl salt off and washed with ether. The combined organic layer were concentrated in vacuo to yield aminoketone **11** or **12**.

**3-(Dimethylamino)-1-(4-(hexyloxy)phenyl)propan-1-one 9.** Yield 92%  $^1\text{H}$  NMR (400 MHz,  $\text{CDCl}_3$ )  $\delta$  7.93 (d, 2H,  $J = 8.9$  Hz), 6.91 (d, 2H,  $J = 8.9$  Hz), 4.01 (t, 2H,  $J = 6.6$  Hz), 3.11 (m, 2H), 2.76 (m, 2H), 2.29 (s, 6H), 1.79 (m, 2H), 1.45 (m, 2H), 1.34 (m, 4H), 0.91 (t, 3H,  $J = 6.9$  Hz);  $^{13}\text{C}$  NMR (100 MHz,  $\text{CDCl}_3$ )  $\delta$  197.58, 163.12, 130.30, 129.75, 114.17, 68.24, 54.57, 45.46, 36.46, 31.50, 29.04, 25.62, 22.55, 13.98; MS (ESI)  $m/z$  278.4  $[\text{M}+\text{H}]^+$ .

**3-(Dimethylamino)-1-(2-(hexyloxy)-4-methylphenyl)propan-1-one 11.** Yield 89%  $^1\text{H}$  NMR (400 MHz,  $\text{CDCl}_3$ )  $\delta$  7.63 (d, 1H,  $J = 7.9$  Hz), 6.76 (t, 1H,  $J = 6.3$  Hz), 6.73 (m, 1H), 4.02 (t, 2H,  $J = 6.2$ ), 3.19 (m, 2H), 2.70 (m, 2H), 2.35 (s, 3H), 2.26 (m, 6H), 1.84 (m, 2H), 1.47 (m, 2H), 1.34 (m, 4H), 0.89 (t, 3H,  $J = 7.0$  Hz);  $^{13}\text{C}$  NMR (100 MHz,  $\text{CDCl}_3$ )  $\delta$  220.10, 177.84, 163.94, 150.03, 144.96, 140.75, 132.35, 87.93, 73.91, 64.86, 61.53, 51.01, 48.72, 45.41, 42.05, 41.30, 33.48; MS (ESI)  $m/z$  292.2  $[\text{M}+\text{H}]^+$ .

**3-(Dimethylamino)-1-(4-(hexyloxy)-3-methylphenyl)propan-1-one 12{1}**. Yield 100%; <sup>1</sup>H NMR (400 MHz, CDCl<sub>3</sub>) δ 7.80 (m, 2H), 6.82 (d, 1H, *J* = 8.5 Hz), 4.02 (t, 2H, *J* = 6.4 Hz), 3.11 (m, 2H), 2.76 (m, 2H), 2.30 (s, 6H), 2.24 (s, 3H), 1.82 (m, 2H), 1.46 (m, 2H), 1.36 (m, 4H), 0.90 (t, 3H, *J* = 7.0 Hz); <sup>13</sup>C NMR (100 MHz, CDCl<sub>3</sub>) δ 197.87, 161.35, 130.64, 129.19, 128.11, 126.90, 109.93, 68.17, 54.66, 45.44, 36.41, 31.49, 29.08, 25.71, 22.55, 16.26, 13.97; MS (ESI) *m/z* 292.4 [M+H]<sup>+</sup>.

**3-(Dimethylamino)-1-(4-(hexyloxy)-2-methylphenyl)propan-1-one 12{2}**. Yield 98%; <sup>1</sup>H NMR (400 MHz, CDCl<sub>3</sub>) δ 7.72 (m, 1H), 6.74 (m, 2H), 3.99 (t, 2H, *J* = 6.6 Hz), 3.07 (t, 2H, *J* = 7.4 Hz), 2.72 (m, 2H), 2.53 (s, 3H), 2.28 (s, 6H), 1.78 (m, 2H), 1.45 (d, 2H, *J* = 7.9 Hz), 1.34 (m, 5H), 0.91 (t, 3H, *J* = 6.9 Hz); <sup>13</sup>C NMR (100 MHz, CDCl<sub>3</sub>) δ 220.17, 180.92, 161.52, 151.02, 149.18, 137.52, 130.47, 87.50, 74.27, 64.94, 58.45, 51.00, 48.56, 45.12, 42.04, 41.86, 33.48; MS (ESI) *m/z* 292.2 [M+H]<sup>+</sup>.

**3-(Dimethylamino)-1-(4-(hexyloxy)-2-methoxyphenyl)propan-1-one 12{4}**. Yield 90%; <sup>1</sup>H NMR (400 MHz, CDCl<sub>3</sub>) δ 7.76 (t, 1H, *J* = 7.6 Hz), 6.47 (dd, 1H, *J* = 2.2, 8.8 Hz), 6.41 (d, 1H, *J* = 2.2 Hz), 3.97 (q, 2H, *J* = 6.9 Hz), 3.86 (s, 3H), 3.20 (t, 2H, *J* = 7.4 Hz), 2.79 (m, 2H), 2.33 (s, 6H), 1.75 (m, 2H), 1.42 (m, 2H), 1.30 (m, 4H), 0.87 (t, 3H, *J* = 7.0 Hz); <sup>13</sup>C NMR (100 MHz, CDCl<sub>3</sub>) δ 198.17, 164.14, 160.81, 132.59, 120.39, 105.65, 98.60, 68.22, 55.39, 54.23, 44.94, 41.09, 31.42, 28.98, 25.54, 22.46, 13.90; MS (ESI) *m/z* 308.4 [M+H]<sup>+</sup>.

**3-(Dimethylamino)-1-(4-(hexyloxy)-3-(methylthio)phenyl)propan-1-one 12{5}**. Yield 93%; <sup>1</sup>H NMR (400 MHz, CDCl<sub>3</sub>) δ 7.73 (m, 2H), 6.80 (d, 1H, *J* = 8.5 Hz), 4.07 (t, 2H, *J* = 6.5 Hz), 3.09 (t, 2H, *J* = 7.4 Hz), 2.74 (m, 2H), 2.43 (d, 3H, *J* = 3.6 Hz), 2.27 (m, 6H), 1.83 (m, 2H), 1.48 (m, 2H),

1.34 (m, 4H), 0.88 (t, 3H,  $J = 7.0$  Hz);  $^{13}\text{C}$  NMR (100 MHz,  $\text{CDCl}_3$ )  $\delta$  197.46, 159.32, 130.05, 128.46, 126.78, 125.16, 109.68, 68.93, 54.58, 45.45, 36.44, 31.43, 28.89, 25.58, 22.49, 14.28, 13.95; MS (ESI)  $m/z$  324.5  $[\text{M}+\text{H}]^+$ .

**1-(3-*tert*-Butyl-4-(hexyloxy)phenyl)-3-(dimethylamino)propan-1-one 12{8}**. Yield 98%;  $^1\text{H}$  NMR (400 MHz,  $\text{CDCl}_3$ )  $\delta$  7.96 (d, 1H,  $J = 2.2$  Hz), 7.82 (dd, 1H,  $J = 2.3, 8.6$  Hz), 6.87 (d, 1H,  $J = 8.6$  Hz), 4.05 (t, 2H,  $J = 6.5$  Hz), 3.74 (t, 1H,  $J = 6.7$  Hz), 3.11 (m, 2H), 2.75 (m, 2H), 2.30 (s, 6H), 1.87 (m, 2H), 1.52 (m, 2H), 1.37 (m, 13H), 0.91 (t, 3H,  $J = 7.1$  Hz);  $^{13}\text{C}$  NMR (100 MHz,  $\text{CDCl}_3$ )  $\delta$  198.12, 161.98, 138.06, 129.10, 128.23, 127.00, 111.04, 68.20, 54.74, 45.50, 36.47, 34.98, 31.45, 29.57, 29.18, 25.94, 22.51, 13.96; MS (ESI)  $m/z$  334.5  $[\text{M}+\text{H}]^+$ .

**1-(3-Fluoro-4-(hexyloxy)phenyl)-3-(dimethylamino)propan-1-one 12{9}**  $^1\text{H}$ NMR (400 MHz,  $\text{CDCl}_3$ )  $\delta$  7.75 – 7.67 (m, 2H), 6.97 (t,  $J = 8.3$ , 1H), 4.10 (T,  $J = 6.7$ , 2H), 3.10 (t,  $J = 7.4$ , 2H), 2.77 (t,  $J = 7.3$ , 2H), 2.31 (s, 6H), 1.91 – 1.75 (m, 2H), 1.47 (M, 2H), 1.34 (M,  $J = 3.6, 7.4$ , 6H), 0.90 (t,  $J = 7.2$ , 4H). NMR (101 MHz,  $\text{CDCl}_3$ )  $\delta$  196.63, 196.61, 153.31, 151.54, 151.43, 150.84, 129.88, 129.83, 125.26, 125.22, 115.77, 115.58, 113.21, 113.20, 69.33, 67.96, 54.29, 45.32, 36.33, 31.42, 31.41, 31.35, 28.89, 28.59, 25.47, 25.32, 22.49, 22.45, 13.94; MS (ESI)  $m/z$  296.4  $[\text{M}+\text{H}]^+$ .

**1-(3-Chloro-4-(hexyloxy)phenyl)-3-(dimethylamino)propan-1-one 12{10}**. Yield 99%;  $^1\text{H}$  NMR (400 MHz,  $\text{CDCl}_3$ )  $\delta$  7.98 (d, 1H,  $J = 2.2$  Hz), 7.84 (dd, 1H,  $J = 2.2, 8.6$  Hz), 6.93 (dd, 1H,  $J = 3.1, 8.6$  Hz), 4.08 (m, 2H), 3.07 (m, 2H), 2.74 (m, 2H), 2.29 (s, 6H), 1.86 (m, 2H), 1.49 (m, 2H), 1.34 (m, 4H), 0.91 (m, 3H);  $^{13}\text{C}$  NMR (100 MHz,  $\text{CDCl}_3$ )  $\delta$  216.15, 177.88, 149.85, 149.64, 147.86,

142.63, 131.55, 96.81, 96.49, 96.17, 88.81, 73.87, 64.94, 55.96, 50.91, 48.32, 45.01, 42.00, 33.45;

MS (ESI)  $m/z$  312.9 [M+H]<sup>+</sup>.

**1-(2-Chloro-4-(hexyloxy)phenyl)-3-(dimethylamino)propan-1-one 12{11}**. Yield 100%; <sup>1</sup>H NMR (400 MHz, CDCl<sub>3</sub>) δ 7.59 (d, 1H,  $J$  = 8.7 Hz), 6.92 (d, 1H,  $J$  = 2.4 Hz), 6.82 (dd, 1H,  $J$  = 2.5, 8.7 Hz), 3.98 (t, 2H,  $J$  = 6.5 Hz), 3.16 (t, 2H,  $J$  = 7.3 Hz), 2.74 (t, 2H,  $J$  = 7.3 Hz), 2.28 (s, 6H), 1.78 (m, 2H), 1.45 (m, 2H), 1.34 (m, 4H), 0.91 (t, 3H,  $J$  = 6.7 Hz); <sup>13</sup>C NMR (100 MHz, CDCl<sub>3</sub>) δ 199.99, 161.73, 133.29, 131.59, 130.57, 116.46, 113.18, 68.57, 54.43, 45.32, 40.70, 31.47, 28.93, 25.57, 22.54, 13.98; MS (ESI)  $m/z$  312.9 [M+H]<sup>+</sup>.

**1-(3-Bromo-4-(hexyloxy)phenyl)-3-(dimethylamino)propan-1-one 12{12}**. Yield 100%; <sup>1</sup>H NMR (400 MHz, CDCl<sub>3</sub>) δ 8.13 (d, 1H,  $J$  = 2.1 Hz), 7.86 (dd, 1H,  $J$  = 2.1, 8.6 Hz), 6.87 (d, 1H,  $J$  = 8.7 Hz), 4.05 (t, 2H,  $J$  = 6.5 Hz), 3.06 (t, 2H,  $J$  = 7.3 Hz), 2.73 (t, 2H,  $J$  = 7.3 Hz), 2.27 (s, 6H), 1.83 (m, 2H), 1.48 (m, 2H), 1.33 (m, 4H), 0.88 (t, 3H,  $J$  = 7.0 Hz); <sup>13</sup>C NMR (100 MHz, CDCl<sub>3</sub>) δ 196.40, 159.15, 133.46, 130.52, 129.06, 112.25, 111.82, 69.33, 54.29, 45.35, 36.35, 31.35, 28.76, 25.48, 22.45, 13.91; MS (ESI)  $m/z$  357.3 [M+H]<sup>+</sup>.

**1-(2-Bromo-4-(hexyloxy)phenyl)-3-(dimethylamino)propan-1-one 12{13}**. Yield 97%; <sup>1</sup>H NMR (400 MHz, CDCl<sub>3</sub>) δ 7.50 (d, 1H,  $J$  = 8.7 Hz), 7.13 (d, 1H,  $J$  = 2.4 Hz), 6.86 (dd, 1H,  $J$  = 2.5, 8.6 Hz), 3.97 (m, 2H), 3.13 (m, 2H), 2.72 (t, 2H,  $J$  = 7.3 Hz), 2.26 (s, 6H), 1.78 (m, 2H), 1.44 (m, 2H), 1.33 (m, 4H), 0.90 (t, 3H,  $J$  = 7.0 Hz); <sup>13</sup>C NMR (100 MHz, CDCl<sub>3</sub>) δ 200.94, 161.32, 132.65, 131.02, 120.77, 119.88, 113.52, 68.56, 54.45, 45.36, 40.37, 31.47, 28.94, 25.57, 22.54, 13.98; MS (ESI)  $m/z$  357.2 [M+H]<sup>+</sup>.



**3-(Dimethylamino)-1-(4-(hexyloxy)-3-iodophenyl)propan-1-one 12{14}**. Yield 100%;  $^1\text{H}$  NMR (400 MHz,  $\text{CDCl}_3$ )  $\delta$  8.38 (d, 1H,  $J = 2.2$  Hz), 7.92 (dd, 1H,  $J = 2.2, 8.6$  Hz), 6.79 (d, 1H,  $J = 8.7$  Hz), 4.07 (t, 2H,  $J = 6.4$  Hz), 3.07 (t, 2H,  $J = 7.4$  Hz), 2.73 (t, 2H,  $J = 7.3$  Hz), 2.28 (s, 6H), 1.85 (m, 3H), 1.51 (m, 2H), 1.36 (m, 4H), 0.91 (t, 3H,  $J = 7.0$  Hz);  $^{13}\text{C}$  NMR (100 MHz,  $\text{CDCl}_3$ )  $\delta$  196.41, 161.26, 139.78, 131.28, 130.12, 110.78, 86.51, 69.49, 54.41, 45.47, 36.49, 31.38, 28.82, 25.63, 22.51, 13.97; MS (ESI)  $m/z$  404.3  $[\text{M}+\text{H}]^+$ .

**3-(Dimethylamino)-1-(4-(hexyloxy)-2-iodophenyl)propan-1-one 12{15}**. Yield 92%;  $^1\text{H}$  NMR (400 MHz,  $\text{CDCl}_3$ )  $\delta$  7.49 (dd, 2H,  $J = 5.6, 12.5$  Hz), 6.89 (dd, 1H,  $J = 2.5, 8.6$  Hz), 3.96 (t, 2H,  $J = 6.5$  Hz), 3.08 (t, 2H,  $J = 7.4$  Hz), 2.73 (t, 2H,  $J = 7.3$  Hz), 2.27 (m, 6H), 1.77 (m, 2H), 1.44 (m, 2H), 1.34 (m, 4H), 0.91 (t, 3H,  $J = 6.6$  Hz);  $^{13}\text{C}$  NMR (100 MHz,  $\text{CDCl}_3$ )  $\delta$  200.72, 161.03, 134.52, 130.21, 127.40, 113.90, 92.89, 68.50, 54.48, 45.38, 39.31, 31.46, 28.95, 25.56, 22.54, 13.98; MS (ESI)  $m/z$  404.3  $[\text{M}+\text{H}]^+$ .

**3-(Dimethylamino)-1-(4-(hexyloxy)-3-(methylsulfonyl)phenyl)propan-1-one 12{16}**. Yield 95%;  $^1\text{H}$  NMR (400 MHz,  $\text{CDCl}_3$ )  $\delta$  8.51 (d, 1H,  $J = 2.2$  Hz), 8.18 (dd, 1H,  $J = 2.3, 8.8$  Hz), 7.05 (d, 1H,  $J = 8.8$  Hz), 4.17 (t, 2H,  $J = 6.6$  Hz), 3.18 (s, 3H), 3.13 (t, 2H,  $J = 7.2$  Hz), 2.78 (t, 2H,  $J = 7.1$  Hz), 2.29 (m, 6H), 1.83 (m, 3H), 1.45 (m, 2H), 1.38 (m, 4H), 0.86 (t, 3H,  $J = 7.1$  Hz);  $^{13}\text{C}$  NMR (100 MHz,  $\text{CDCl}_3$ )  $\delta$  196.13, 160.19, 135.43, 130.21, 129.45, 128.41, 113.02, 69.99, 53.98, 45.21, 42.90, 36.19, 31.32, 28.77, 25.50, 22.43, 13.92; MS (ESI)  $m/z$  356.4  $[\text{M}+\text{H}]^+$ .

**3-(Dimethylamino)-1-(4-(hexyloxy)-2,6-dimethylphenyl)propan-1-one 12{22}**. Yield 93%;  $^1\text{H}$  NMR (400 MHz,  $\text{CDCl}_3$ )  $\delta$  6.54 (s, 2H), 3.92 (t, 2H,  $J = 6.5$  Hz), 2.88 (t, 2H,  $J = 7.5$  Hz), 2.71 (t, 2H,  $J = 7.0$  Hz), 2.25 (s, 6H), 2.21 (s, 6H), 1.75 (m, 2H), 1.44 (m, 2H), 1.33 (m, 4H), 0.90 (t, 3H,  $J = 7.0$  Hz);  $^{13}\text{C}$  NMR (100 MHz,  $\text{CDCl}_3$ )  $\delta$  209.16, 159.04, 134.90, 134.66, 113.72, 67.85, 53.88, 45.42, 43.35, 31.54, 29.18, 25.68, 22.58, 19.60, 14.01; MS (ESI)  $m/z$  306.5  $[\text{M}+\text{H}]^+$ .

**3-(Dimethylamino)-1-(6-(hexyloxy)biphenyl-3-yl)propan-1-one 12{27}**.  $^1\text{H}$  NMR (400 MHz,  $\text{CDCl}_3$ )  $\delta$  7.95 (m, 2H), 7.53 (m, 2H), 7.41 (m, 2H), 7.34 (m, 1H), 6.99 (d, 1H,  $J = 8.2$  Hz), 4.04 (t, 2H,  $J = 6.5$  Hz), 3.15 (m, 2H), 2.78 (m, 2H), 2.28 (s, 6H), 1.74 (m, 2H), 1.40 (m, 2H), 1.29 (m, 4H), 0.89 (m, 3H);  $^{13}\text{C}$  NMR (100 MHz,  $\text{CDCl}_3$ )  $\delta$  197.61, 159.95, 137.56, 131.16, 130.69, 129.72, 129.49, 129.35, 127.89, 127.18, 111.44, 68.55, 54.51, 45.40, 36.44, 31.31, 28.83, 25.59, 22.48, 13.90; MS (ESI)  $m/z$  354.5  $[\text{M}+\text{H}]^+$ .

**1-(3-Benzyl-4-(hexyloxy)phenyl)-3-(dimethylamino)propan-1-one 12{28}**  $^1\text{H}$  NMR (400 MHz,  $\text{CDCl}_3$ )  $\delta$  7.87 (dd, 1H,  $J = 2.2, 8.5$  Hz), 7.80 (d, 1H,  $J = 2.2$  Hz), 7.24 (m, 5H), 6.88 (d, 1H,  $J = 8.6$  Hz), 4.02 (m, 4H), 3.09 (m, 2H), 2.75 (m, 2H), 2.30 (s, 6H), 1.79 (m, 2H), 1.43 (m, 2H), 1.33 (m, 4H), 0.92 (t, 3H,  $J = 6.7$  Hz);  $^{13}\text{C}$  NMR (100 MHz,  $\text{CDCl}_3$ )  $\delta$  197.81, 160.91, 140.36, 130.60, 129.89, 129.40, 128.79, 128.68, 128.25, 125.93, 110.45, 68.24, 54.65, 45.44, 36.44, 36.25, 31.48, 29.05, 25.66, 22.54, 13.99; MS (ESI)  $m/z$  368.5  $[\text{M}+\text{H}]^+$ .

**General procedure for 22 and 24:** To a solution phenol **21{3}** (1.0 eq.) in DMF was added  $\text{K}_2\text{CO}_2$  (2.0 eq.) and n-hexylbromide (1.5 eq.), and then stirred at 85 °C for overnight. The reaction mixture

was poured to water and extracted with Et<sub>2</sub>O. The combined organic layer were washed with brine and dried over MgSO<sub>4</sub> and concentrated *in vacuo* to yield crude compound **9**. Most of products were used for next step without any purification. **1-(4-(Hexyloxy)-3-methoxyphenyl)ethanone 22{3}**. <sup>1</sup>H NMR (400 MHz, CDCl<sub>3</sub>) δ 7.54 (m, 2H), 6.87 (d, 1H, *J* = 8.3 Hz), 4.07 (m, 2H), 3.92 (s, 3H), 2.56 (s, 3H), 1.87 (m, 2H), 1.47 (m, 2H), 1.35 (m, 4H), 0.90 (m, 3H); <sup>13</sup>C NMR (100 MHz, CDCl<sub>3</sub>) δ 196.78, 152.97, 149.22, 130.21, 123.21, 111.02, 110.44, 69.05, 56.03, 31.52, 28.91, 26.17, 25.56, 22.54, 13.98.

**Synthesis of compound 22{6}**: To a solution of compound **21{7, R=3-F}** in DMF was added NaSMe and stirred at rt for 1 h. The reaction mixture was poured into water and extracted with Et<sub>2</sub>O. The combined organic layer was washed with brine, dried over with MgSO<sub>4</sub>. After concentration under vacuum, the crude mixture was purified on normal phase column chromatography (SP1, Biotage) to yield the desired product. **1-(4-(Hexyloxy)-2-(methylthio)phenyl)ethanone 22{6}**. <sup>1</sup>H NMR (400 MHz, CDCl<sub>3</sub>) δ 7.83 (d, 1H, *J* = 8.7 Hz), 6.77 (d, 1H, *J* = 2.4 Hz), 6.64 (dd, 1H, *J* = 2.4, 8.7 Hz), 4.02 (t, 2H, *J* = 6.6 Hz), 2.55 (s, 3H), 2.39 (s, 3H), 1.80 (m, 2H), 1.45 (m, 2H), 1.34 (m, 4H), 0.91 (t, 3H, *J* = 8.0 Hz); <sup>13</sup>C NMR (100 MHz, CDCl<sub>3</sub>) δ 196.99, 162.27, 145.93, 133.74, 126.82, 111.08, 108.25, 68.25, 31.52, 29.07, 27.62, 25.64, 22.56, 15.78, 14.00.

**1-(2-Fluoro-4-(hexyloxy)phenyl)ethanone 22{7}**. <sup>1</sup>H NMR (400 MHz, CDCl<sub>3</sub>) δ 7.86 (t, 1H, *J* = 8.8 Hz), 6.72 (dd, 1H, *J* = 2.4, 8.9 Hz), 6.58 (m, 1H), 3.98 (t, 2H, *J* = 6.6 Hz), 2.57 (d, 3H, *J* = 5.2 Hz), 1.78 (m, 2H), 1.45 (m, 2H), 1.33 (m, 4H), 0.90 (t, 3H, *J* = 8.0 Hz); <sup>13</sup>C NMR (100 MHz,

CDCl<sub>3</sub>)  $\delta$  194.42 (d,  $J = 2.0$  Hz), 165.10, 164.44 (d,  $J = 5.9$  Hz), 163.84 (d,  $J = 127.55$  Hz), 131.95 (d,  $J = 2.2$  Hz), 118.28 (d,  $J = 7.5$  Hz), 111.04 (d,  $J = 1.2$  Hz), 101.95 (d,  $J = 13.8$  Hz), 68.71, 31.31 (d,  $J = 13.6$  Hz), 28.87, 25.54, 22.52, 13.95.

**General procedure for oxidation of thioether to sulfonyl compound- Synthesis of compound**

**22{17}** To a solution of **22{6}** in DCM was added *m*CPBA (2.2 eq) at 0 °C and stirred for 1 h. The reaction mixture was poured to water and extracted with DCM. The combined organic layer was washed with NaHCO<sub>3</sub> and brine, dried over MgSO<sub>4</sub>, and concentrated in vacuo to yield the corresponding sulfonyl compound. **1-(4-(Hexyloxy)-2-(methylsulfonyl)phenyl)ethanone 22{17}**.

<sup>1</sup>H NMR (400 MHz, CDCl<sub>3</sub>)  $\delta$  7.60 (d, 1H,  $J = 2.6$  Hz), 7.47 (d, 1H,  $J = 8.5$  Hz), 7.12 (dd, 1H,  $J = 2.6, 8.5$  Hz), 4.04 (t, 2H,  $J = 6.5$  Hz), 3.33 (s, 3H), 2.60 (s, 3H), 1.80 (m, 2H), 1.45 (m, 2H), 1.34 (m, 4H), 0.91 (m, 3H); <sup>13</sup>C NMR (100 MHz, CDCl<sub>3</sub>)  $\delta$  201.84, 160.46, 140.08, 133.41, 129.07, 118.79, 115.90, 68.86, 45.92, 31.42, 30.47, 28.88, 25.53, 22.52, 13.96.

**1-(4-(Hexyloxy)-3-(trifluoromethyl)phenyl)ethanone 22{18}**. <sup>1</sup>H NMR (400 MHz, CDCl<sub>3</sub>)  $\delta$  8.17 (d, 1H,  $J = 2.2$  Hz), 8.10 (dd, 1H,  $J = 2.2, 8.7$  Hz), 7.02 (d, 1H,  $J = 8.7$  Hz), 4.11 (t, 2H,  $J = 6.4$  Hz), 2.57 (s, 3H), 1.83 (m, 2H), 1.48 (m, 2H), 1.33 (m, 4H), 0.90 (t, 3H,  $J = 8.0$  Hz).

**1-(4-(Hexyloxy)-2-(trifluoromethyl)phenyl)ethanone 22{19}**. <sup>1</sup>H NMR (400 MHz, CDCl<sub>3</sub>)  $\delta$  7.51 (d, 1H,  $J = 8.6$  Hz), 7.21 (d, 1H,  $J = 2.5$  Hz), 7.03 (dd, 1H,  $J = 2.5, 8.6$  Hz), 4.01 (t, 2H,  $J = 6.5$  Hz), 2.55 (s, 3H), 1.79 (m, 2H), 1.45 (d, 2H), 1.34 (m, 4H), 0.91 (t, 3H,  $J = 8.0$  Hz).

**1-(4-(Hexyloxy)-3-nitrophenyl)ethanone 22{20}**. <sup>1</sup>H NMR (400 MHz, CDCl<sub>3</sub>)  $\delta$  8.40 (d, 1H,  $J = 2.2$  Hz), 8.13 (m, 1H), 7.12 (d, 1H,  $J = 8.9$  Hz), 4.17 (t, 2H,  $J = 6.5$  Hz), 2.59 (s, 3H), 1.85 (m, 2H),

1.49 (m, 2H), 1.34 (m, 4H), 0.90 (m, 3H);  $^{13}\text{C}$  NMR (100 MHz,  $\text{CDCl}_3$ )  $\delta$  194.80, 155.80, 139.40, 133.77, 129.26, 126.11, 113.96, 70.15, 31.33, 28.70, 26.28, 25.39, 22.46, 13.93.

**2-(Hexyloxy)-1,3-dimethylbenzene 22{21}**.  $^1\text{H}$  NMR (400 MHz,  $\text{CDCl}_3$ )  $\delta$  7.63 (s, 2H), 3.79 (t, 2H,  $J = 6.6$  Hz), 2.54 (s, 3H), 2.31 (s, 6H), 1.81 (m, 2H), 1.50 (m, 2H), 1.36 (m, 4H), 0.92 (m, 3H);  $^{13}\text{C}$  NMR (100 MHz,  $\text{CDCl}_3$ )  $\delta$  197.64, 160.49, 132.66, 131.20, 129.35, 72.47, 31.69, 30.35, 26.48, 25.73, 22.60, 16.45, 14.02.

**1-(4-(Hexyloxy)-2-isopropyl-5-methylphenyl)ethanone 22{23}**.  $^1\text{H}$  NMR (400 MHz, )  $\delta$  7.42 (s, 1H), 6.82 (s, 1H), 4.02 (t, 2H,  $J = 6.4$  Hz), 3.75 (m, 1H), 2.54 (s, 3H), 2.21 (s, 3H), 1.81 (m, 2H), 1.50 (m, 2H), 1.35 (m, 4H), 1.22 (d, 6H,  $J = 6.8$  Hz), 0.92 (t, 3H,  $J = 7.0$  Hz);  $^{13}\text{C}$  NMR (100 MHz,  $\text{CDCl}_3$ )  $\delta$  201.27, 159.74, 149.39, 131.88, 129.52, 123.44, 108.42, 67.90, 31.53, 30.11, 29.18, 28.97, 25.76, 24.13, 22.58, 15.77, 13.99.

**1-(2,5-Dichloro-4-(hexyloxy)phenyl)ethanone 22{25}**.  $^1\text{H}$  NMR (400 MHz, )  $\delta$  7.74 (s, 1H), 6.92 (s, 1H), 4.06 (t, 2H,  $J = 6.5$  Hz), 2.63 (m, 3H), 1.85 (m, 2H), 1.49 (m, 2H), 1.35 (m, 4H), 0.91 (t, 3H,  $J = 7.0$  Hz);  $^{13}\text{C}$  NMR (100 MHz,  $\text{CDCl}_3$ )  $\delta$  196.99, 157.11, 131.95, 131.87, 130.54, 121.71, 114.79, 69.72, 31.38, 30.57, 28.73, 25.48, 22.51, 13.96.

**General procedure for Mannich reaction:** A solution of compound **24** (50 mg, 0.23 mmol, 1 equiv.), dimethylamine hydrochloride (37 mg, 0.45 mmol, 2 equiv.), paraformaldehyde (15 mg, 0.45 mmol, 2 equiv.), and conc-HCl (cat.) in  $\text{H}_2\text{O}$ /acetonitrile (1/9) was heated at 120 °C in MW for 2 h. The reaction mixture was concentrated *in vacuo*, and purified on normal phase column

chromatography (SP1, Biotage) to yield the desired product **10. 3-(Dimethylamino)-1-(3-(hexyloxy)phenyl)propan-1-one 10**. Yield 79%  $^1\text{H}$  NMR (400 MHz,  $\text{CDCl}_3$ )  $\delta$  7.52 (d, 1H,  $J = 7.7$  Hz), 7.47 (m, 1H), 7.35 (t, 1H,  $J = 7.9$  Hz), 7.09 (m, 1H), 3.99 (t, 2H,  $J = 6.6$  Hz), 3.15 (t, 2H,  $J = 7.4$  Hz), 2.78 (t, 2H,  $J = 7.3$  Hz), 2.31 (s, 6H), 1.79 (m, 2H), 1.46 (m, 2H), 1.34 (m, 4H), 0.90 (t, 3H,  $J = 7.0$  Hz);  $^{13}\text{C}$  NMR (100 MHz,  $\text{CDCl}_3$ )  $\delta$  198.86, 159.40, 138.19, 129.53, 120.45, 120.01, 113.00, 68.23, 54.36, 45.41, 36.89, 31.53, 29.13, 25.67, 22.57, 14.00; MS (ESI)  $m/z$  278.3  $[\text{M}+\text{H}]^+$ .

**3-(Dimethylamino)-1-(4-(hexyloxy)-3-methoxyphenyl)propan-1-one 12{3}**. Yield 83%  $^1\text{H}$  NMR (400 MHz,  $\text{CDCl}_3$ )  $\delta$  7.56 (dd, 1H,  $J = 1.9, 8.4$  Hz), 7.49 (d, 1H,  $J = 1.9$  Hz), 6.85 (d, 1H,  $J = 8.5$  Hz), 4.05 (t, 2H,  $J = 6.9$  Hz), 3.89 (d, 3H,  $J = 6.9$  Hz), 3.19 (t, 2H,  $J = 7.3$  Hz), 2.87 (t, 2H,  $J = 7.3$  Hz), 2.37 (s, 6H), 1.84 (m, 2H), 1.43 (m, 2H), 1.32 (m, 4H), 0.87 (t, 3H,  $J = 7.0$  Hz);  $^{13}\text{C}$  NMR (100 MHz,  $\text{CDCl}_3$ )  $\delta$  196.96, 153.08, 149.22, 129.50, 122.76, 111.05, 110.40, 68.99, 55.97, 54.33, 45.02, 35.72, 31.44, 28.83, 25.48, 22.46, 13.91; MS (ESI)  $m/z$  308.4  $[\text{M}+\text{H}]^+$ .

**3-(Dimethylamino)-1-(4-(hexyloxy)-2-(methylthio)phenyl)propan-1-one 12{6}**. Yield 65%  $^1\text{H}$  NMR (400 MHz,  $\text{CDCl}_3$ )  $\delta$  7.90 (d, 1H,  $J = 8.8$  Hz), 6.75 (d, 1H,  $J = 2.2$  Hz), 6.65 (m, 1H), 4.01 (t, 2H,  $J = 6.5$  Hz), 3.40 (s, 2H), 3.17 (s, 2H), 2.53 (m, 6H), 2.38 (s, 3H), 1.78 (m, 2H), 1.45 (m, 2H), 1.33 (m, 4H), 0.89 (t, 3H,  $J = 7.0$  Hz);  $^{13}\text{C}$  NMR (100 MHz,  $\text{CDCl}_3$ )  $\delta$  195.61, 162.69, 146.32, 133.37, 125.62, 111.39, 108.47, 68.33, 53.60, 44.21, 35.59, 31.48, 29.00, 25.59, 22.52, 15.75, 13.97; MS (ESI)  $m/z$  324.5  $[\text{M}+\text{H}]^+$ .

**Synthesis of compound 12{7}**: A solution of compound **22{7}** and dimethylamine hydrochloride (3eq.) in DMF was heated at 110 °C in MW for 1h. The reaction mixture was poured into water and

extracted with Et<sub>2</sub>O. The combined organic layer was washed with brine, dried over with MgSO<sub>4</sub>.

After concentration under vacuum, the crude mixture was purified on normal phase column

chromatography (SP1, Biotage) to yield the desired product. **3-(Dimethylamino)-1-(2-**

**(dimethylamino)-4-(hexyloxy)phenyl)propan-1-one 12{7}**. <sup>1</sup>H NMR (400 MHz, CDCl<sub>3</sub>) δ 7.43 (d,

1H, *J* = 8.5 Hz), 6.45 (m, 2H), 3.98 (m, 2H), 3.17 (m, 2H), 2.77 (s, 7H), 2.66 (m, 2H), 2.27 (s, 6H),

1.77 (m, 2H), 1.40 (m, 7H), 0.90 (t, 3H, *J* = 6.6 Hz); <sup>13</sup>C NMR (100 MHz, CDCl<sub>3</sub>) δ 203.03, 162.36,

154.11, 132.01, 124.85, 105.36, 103.87, 68.01, 55.41, 45.34, 44.44, 39.03, 31.54, 29.16, 25.68,

22.56, 14.00.

**3-(Dimethylamino)-1-(4-(hexyloxy)-2-(methylsulfonyl)phenyl)propan-1-one 12{17}**. Yield 42%

<sup>1</sup>H NMR (400 MHz, CDCl<sub>3</sub>) δ 7.57 (d, 1H, *J* = 2.5 Hz), 7.46 (d, 1H, *J* = 8.5 Hz), 7.11 (dd, 1H, *J* =

2.5, 8.5 Hz), 4.03 (t, 2H, *J* = 6.5 Hz), 3.26 (m, 3H), 3.05 (t, 2H, *J* = 7.3 Hz), 2.73 (t, 1H, *J* = 7.2 Hz),

2.25 (m, 6H), 1.79 (m, 2H), 1.45 (s, 2H), 1.33 (m, 4H), 0.89 (t, 3H, *J* = 7.0 Hz); <sup>13</sup>C NMR (100

MHz, CDCl<sub>3</sub>) δ 203.54, 160.34, 139.90, 133.45, 128.86, 118.92, 115.71, 68.85, 53.80, 46.02, 45.41,

41.50, 31.42, 28.89, 25.54, 22.52, 13.96; MS (ESI) *m/z* 356.4 [M+H]<sup>+</sup>.

**3-(Dimethylamino)-1-(4-(hexyloxy)-3-(trifluoromethyl)phenyl)propan-1-one 12{18}**. Yield 8%;

<sup>1</sup>H NMR (400 MHz, CDCl<sub>3</sub>) δ 7.43 (d, 1H, *J* = 8.6 Hz), 7.14 (d, 1H, *J* = 2.4 Hz), 6.97 (dd, 1H, *J* =

2.5, 8.6 Hz), 3.95 (t, 2H, *J* = 6.5 Hz), 2.95 (t, 2H, *J* = 7.3 Hz), 2.63 (t, 2H, *J* = 7.3 Hz), 2.19 (s, 6H),

1.73 (m, 2H), 1.40 (s, 2H), 1.28 (m, 5H), 0.84 (t, 3H, *J* = 6.9 Hz); MS (ESI) *m/z* 346.3 [M+H]<sup>+</sup>.

**3-(Dimethylamino)-1-(4-(hexyloxy)-2-(trifluoromethyl)phenyl)propan-1-one 12{19}**. Yield

20%; <sup>1</sup>H NMR (400 MHz, CDCl<sub>3</sub>) δ 8.13 (s, 1H), 8.05 (d, 1H, *J* = 8.7 Hz), 6.97 (t, 1H, *J* = 9.5 Hz),

4.05 (t, 2H,  $J = 6.3$  Hz), 3.08 (t, 2H,  $J = 7.3$  Hz), 2.74 (t, 3H,  $J = 7.3$  Hz), 2.26 (s, 6H), 1.77 (m, 2H), 1.43 (d, 2H,  $J = 7.1$  Hz), 1.28 (m, 4H), 0.83 (t, 3H,  $J = 6.9$  Hz); MS (ESI)  $m/z$  346.4  $[M+H]^+$ .

**3-(Dimethylamino)-1-(4-(hexyloxy)-3-nitrophenyl)propan-1-one 12{20}**. Yield 63%  $^1\text{H}$  NMR (400 MHz,  $\text{CDCl}_3$ )  $\delta$  8.41 (d, 1H,  $J = 2.3$  Hz), 8.12 (m, 1H), 7.12 (t, 1H,  $J = 10.0$  Hz), 4.16 (t, 2H,  $J = 6.4$  Hz), 3.13 (t, 2H,  $J = 7.2$  Hz), 2.79 (t, 2H,  $J = 7.2$  Hz), 2.31 (s, 6H), 1.84 (m, 2H), 1.47 (s, 2H), 1.33 (m, 4H), 0.89 (t, 3H,  $J = 6.7$  Hz);  $^{13}\text{C}$  NMR (100 MHz,  $\text{CDCl}_3$ )  $\delta$  195.71, 155.81, 139.48, 133.66, 128.95, 125.82, 113.99, 70.15, 54.08, 45.35, 36.41, 31.33, 28.70, 25.40, 22.47, 13.94; MS (ESI)  $m/z$  323.4  $[M+H]^+$ .

**3-(Dimethylamino)-1-(4-(hexyloxy)-3,5-dimethylphenyl)propan-1-one 12{21}**. Yield 47%;  $^1\text{H}$  NMR (400 MHz,  $\text{CDCl}_3$ )  $\delta$  7.57 (s, 1H), 3.72 (t, 1H,  $J = 6.6$  Hz), 3.02 (t, 1H,  $J = 7.4$  Hz), 2.66 (m, 1H), 2.24 (s, 3H), 2.22 (s, 3H), 1.74 (m, 1H), 1.43 (m, 1H), 1.28 (m, 2H), 0.85 (m, 2H);  $^{13}\text{C}$  NMR (100 MHz,  $\text{CDCl}_3$ )  $\delta$  195.62, 161.16, 131.54, 129.66, 129.19, 72.45, 53.03, 43.64, 34.16, 31.59, 30.26, 25.63, 22.52, 16.38, 13.95; MS (ESI)  $m/z$  306.5  $[M+H]^+$ .

**3-(Dimethylamino)-1-(4-(hexyloxy)-2-isopropyl-5-methylphenyl)propan-1-one 12{23}**. Yield 80%;  $^1\text{H}$  NMR (400 MHz,  $\text{CDCl}_3$ )  $\delta$  7.44 (s, 1H), 6.79 (s, 1H), 3.99 (t, 2H,  $J = 6.4$  Hz), 3.61 (m, 1H), 3.35 (t, 2H,  $J = 7.2$  Hz), 3.14 (t, 2H,  $J = 7.1$  Hz), 2.58 (s, 6H), 2.15 (s, 3H), 1.78 (m, 2H), 1.46 (m, 2H), 1.31 (m, 4H), 1.18 (d, 6H,  $J = 6.8$  Hz), 0.88 (t, 3H,  $J = 7.0$  Hz);  $^{13}\text{C}$  NMR (100 MHz,  $\text{CDCl}_3$ )  $\delta$  199.49, 160.16, 149.88, 131.41, 128.01, 123.77, 108.45, 67.83, 53.68, 44.05, 37.69, 31.41, 31.40, 29.02, 25.63, 24.02, 22.46, 15.64, 15.63, 13.88; MS (ESI)  $m/z$  334.5  $[M+H]^+$ .



**1-(2,3-dichloro-4-(hexyloxy)phenyl)-3-(dimethylamino)propan-1-one 12{24}**  $^1\text{H}$  NMR (400 MHz,  $\text{CDCl}_3$ )  $\delta$  7.44 (d,  $J = 8.7$ , 2H), 6.87 (d,  $J = 8.7$ , 2H), 4.08 (t,  $J = 6.5$ , 4H), 3.20 – 3.09 (m, 4H), 2.73 (t,  $J = 7.3$ , 4H), 2.27 (s, 12H), 1.93 – 1.80 (m, 4H), 1.59 – 1.42 (m, 4H), 1.43 – 1.30 (m, 8H), 0.99 – 0.82 (m, 6H);  $^{13}\text{C}$  NMR (101 MHz,  $\text{CDCl}_3$ )  $\delta$  200.65, 157.64, 136.07, 132.77, 128.00, 123.24, 110.38, 69.75, 54.41, 45.35, 41.05, 31.45, 28.87, 25.57, 22.57, 14.02; MS (ESI)  $m/z$  347.3  $[\text{M}+\text{H}]^+$ .

**1-(2,5-Dichloro-4-(hexyloxy)phenyl)-3-(dimethylamino)propan-1-on 12{25}**. Yield 32%;  $^1\text{H}$  NMR (400 MHz,  $\text{CDCl}_3$ )  $\delta$  7.59 (s, 1H), 6.84 (s, 1H), 3.98 (t, 2H,  $J = 6.5$  Hz), 3.09 (t, 2H,  $J = 7.2$  Hz), 2.68 (t, 2H,  $J = 7.2$  Hz), 2.22 (s, 6H), 1.78 (m, 2H), 1.42 (s, 2H), 1.27 (m, 4H), 0.84 (t, 3H,  $J = 7.1$  Hz);  $^{13}\text{C}$  NMR (100 MHz,  $\text{CDCl}_3$ )  $\delta$  198.78, 156.92, 131.45, 131.31, 130.71, 121.75, 114.73, 69.71, 54.23, 45.24, 40.62, 31.38, 28.73, 25.48, 22.51, 13.96; MS (ESI)  $m/z$  347.3  $[\text{M}+\text{H}]^+$ .

**1-(2,6-dichloro-4-(hexyloxy)phenyl)-3-(dimethylamino)propan-1-one 12{26}**  $^1\text{H}$  NMR (400 MHz,  $\text{CDCl}_3$ )  $\delta$  6.75 (s, 2H), 3.86 (t,  $J = 6.5$ , 2H), 2.94 (t,  $J = 7.4$ , 2H), 2.68 (t,  $J = 7.4$ , 2H), 2.20 (s, 6H), 1.72 – 1.58 (m, 2H), 1.43 – 1.31 (m, 2H), 1.31 – 1.20 (m, 4H), 0.87 (t,  $J = 7.0$ , 3H);  $^{13}\text{C}$  NMR (101 MHz,  $\text{CDCl}_3$ )  $\delta$  201.28, 159.93, 131.95, 131.12, 114.56, 68.87, 53.22, 45.35, 42.36, 31.46, 28.88, 25.56, 22.57, 14.02; MS (ESI)  $m/z$  346.3  $[\text{M}+\text{H}]^+$ .

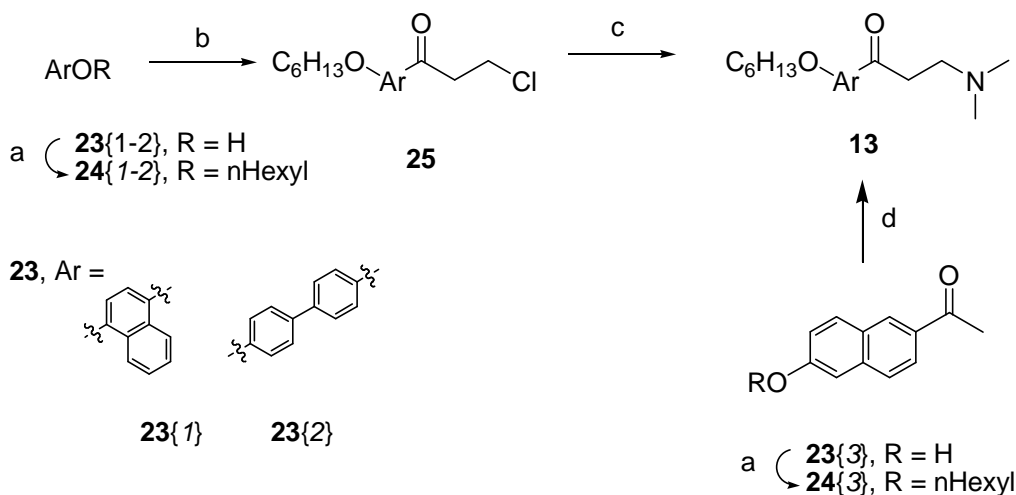

*Reagent and condition.* (a) Hexyl bromide,  $\text{K}_2\text{CO}_3$ , DMF, 80-90 °C, 12 h; (b) 2-Chloropropyl chloride,  $\text{AlCl}_3$ , DCM, 0 °C; (c) 1 M  $\text{Me}_2\text{NH}/\text{THF}$ , THF, rt, 30 min; (d) paraformaldehyde,  $\text{Me}_2\text{NH}\cdot\text{HCl}$ ,  $c\text{-HCl}$ ,  $\text{H}_2\text{O}/\text{MeCN}$  (1/9, v/v), MW, 120 °C, 2 h

**1-(Hexyloxy)naphthalene 24}\{1\}**.  $^1\text{H}$  NMR (400 MHz,  $\text{CDCl}_3$ )  $\delta$  8.30 (dd, 1H,  $J = 3.0, 6.7$  Hz), 7.80 (dd, 1H,  $J = 3.1, 6.3$  Hz), 7.48 (m, 2H), 7.39 (m, 2H), 6.81 (dd, 1H,  $J = 1.1, 7.3$  Hz), 4.14 (t, 2H,  $J = 6.4$  Hz), 1.94 (m, 2H), 1.58 (m, 2H), 1.41 (m, 4H), 0.93 (m, 3H);  $^{13}\text{C}$  NMR (100 MHz,  $\text{CDCl}_3$ )  $\delta$  154.90, 134.48, 127.38, 126.27, 125.89, 125.75, 125.00, 122.08, 119.89, 104.51, 68.13, 31.63, 29.28, 25.95, 22.63, 14.04.

**4-(Hexyloxy)biphenyl 24}\{2\}**.  $^1\text{H}$  NMR (400 MHz,  $\text{CDCl}_3$ )  $\delta$  7.46 (m, 4H), 7.34 (m, 2H), 7.21 (m, 1H), 6.89 (m, 2H), 3.92 (t, 2H,  $J = 6.6$  Hz), 1.73 (m, 2H), 1.41 (m, 2H), 1.28 (m, 4H), 0.84 (t, 3H,  $J = 7.0$  Hz);  $^{13}\text{C}$  NMR (100 MHz,  $\text{CDCl}_3$ )  $\delta$  158.74, 140.91, 133.54, 128.70, 128.10, 126.72, 126.59, 114.78, 68.11, 31.61, 29.28, 25.76, 22.63, 14.05.

**1-(4-(hexyloxy)phenyl)ethanone 24{3}**.  $^1\text{H NMR}$  (400 MHz,  $\text{CDCl}_3$ )  $\delta$  8.38 (s, 1H), 7.99 (dd, 1H,  $J = 1.8, 8.6$  Hz), 7.84 (d, 1H,  $J = 8.9$  Hz), 7.74 (d, 1H,  $J = 8.6$  Hz), 7.20 (dd, 1H,  $J = 2.5, 8.9$  Hz), 7.14 (d, 1H,  $J = 2.4$  Hz), 4.10 (t, 2H,  $J = 6.6$  Hz), 2.70 (s, 3H), 1.86 (m, 2H), 1.50 (m, 2H), 1.38 (m, 4H), 0.92 (t, 3H,  $J = 7.1$  Hz).

**3-Chloro-1-(4-(hexyloxy)naphthalen-1-yl)propan-1-one 25{1}**.  $^1\text{H NMR}$  (400 MHz,  $\text{CDCl}_3$ )  $\delta$  8.97 (d, 1H,  $J = 8.4$  Hz), 8.35 (d, 1H,  $J = 8.4$  Hz), 7.98 (dd, 1H,  $J = 3.8, 8.2$  Hz), 7.63 (dd, 1H,  $J = 6.9, 8.6$  Hz), 7.54 (d, 1H,  $J = 8.3$  Hz), 6.78 (d, 1H,  $J = 8.3$  Hz), 4.20 (m, 2H), 3.99 (m, 2H), 3.52 (m, 2H), 1.96 (m, 2H), 1.58 (m, 2H), 1.40 (m, 4H), 0.94 (m, 3H);  $^{13}\text{C NMR}$  (100 MHz,  $\text{CDCl}_3$ )  $\delta$  198.29, 159.08, 132.05, 131.50, 128.84, 126.31, 125.93, 125.91, 125.84, 122.24, 102.64, 68.59, 43.28, 39.65, 31.54, 29.02, 25.85, 22.58, 14.01.

**3-Chloro-1-(4'-(hexyloxy)biphenyl-4-yl)propan-1-one 25{2}**.  $^1\text{H NMR}$  (400 MHz,  $\text{CDCl}_3$ )  $\delta$  8.00 (d, 2H,  $J = 8.5$  Hz), 7.66 (d, 2H,  $J = 8.5$  Hz), 7.56 (d, 2H,  $J = 8.8$  Hz), 6.99 (d, 2H,  $J = 8.8$  Hz), 3.97 (m, 4H), 3.48 (t, 2H,  $J = 4.8$  Hz), 1.81 (m, 2H), 1.48 (m, 2H), 1.36 (m, 4H), 0.91 (m, 3H);  $^{13}\text{C NMR}$  (100 MHz,  $\text{CDCl}_3$ )  $\delta$  196.20, 159.61, 145.89, 134.39, 131.76, 128.66, 128.32, 126.67, 114.97, 68.15, 41.24, 38.80, 31.57, 29.19, 25.70, 22.59, 14.02.

**3-(Dimethylamino)-1-(4-(hexyloxy)naphthalen-1-yl)propan-1-one 13{1}**. Yield 94%;  $^1\text{H NMR}$  (400 MHz,  $\text{CDCl}_3$ )  $\delta$  8.89 (m, 1H), 8.34 (dd, 1H,  $J = 0.6, 8.4$  Hz), 7.98 (d, 1H,  $J = 8.2$  Hz), 7.60 (m, 1H), 7.51 (m, 1H), 6.76 (d, 1H,  $J = 8.2$  Hz), 4.18 (t, 2H,  $J = 6.4$  Hz), 3.23 (t, 2H,  $J = 7.4$  Hz), 2.83 (m, 2H), 2.29 (s, 6H), 1.94 (m, 2H), 1.56 (m, 2H), 1.39 (m, 4H), 0.93 (t, 3H,  $J = 7.0$  Hz);  $^{13}\text{C NMR}$  (100 MHz,  $\text{CDCl}_3$ )  $\delta$  201.11, 158.54, 132.01, 130.83, 128.49, 127.12, 125.98, 125.88, 125.63,

122.13, 102.63, 68.46, 55.00, 45.34, 39.25, 31.51, 29.01, 25.83, 22.55, 13.98; MS (ESI)  $m/z$  328.5 [M+H]<sup>+</sup>.

**3-(Dimethylamino)-1-(4'-(hexyloxy)biphenyl-4-yl)propan-1-one 13{2}**. Yield 100%; <sup>1</sup>H NMR (400 MHz, CDCl<sub>3</sub>) δ 8.00 (d, 2H,  $J$  = 8.3 Hz), 7.63 (d, 2H,  $J$  = 8.3 Hz), 7.56 (dd, 2H,  $J$  = 4.9, 6.8 Hz), 6.98 (dd, 2H,  $J$  = 4.9, 6.8 Hz), 3.99 (t, 2H,  $J$  = 6.6 Hz), 3.18 (t, 2H,  $J$  = 7.4 Hz), 2.79 (t, 2H,  $J$  = 7.4 Hz), 2.31 (m, 6H), 1.80 (m, 2H), 1.45 (m, 2H), 1.33 (m, 4H), 0.91 (t, 3H,  $J$  = 7.0 Hz); <sup>13</sup>C NMR (100 MHz, CDCl<sub>3</sub>) δ 198.51, 159.45, 145.35, 134.89, 131.87, 128.62, 128.23, 126.52, 114.89, 68.07, 54.41, 45.44, 36.80, 31.52, 29.16, 25.66, 22.55, 13.98; MS (ESI)  $m/z$  354.5 [M+H]<sup>+</sup>.

**3-(Dimethylamino)-1-(6-(hexyloxy)naphthalen-2-yl)propan-1-one 13{3}**. Yield 61%; <sup>1</sup>H NMR (400 MHz, CDCl<sub>3</sub>) δ 8.39 (s, 1H), 7.98 (dd, 1H,  $J$  = 1.7, 8.6 Hz), 7.83 (d, 1H,  $J$  = 9.0 Hz), 7.71 (dd, 1H,  $J$  = 7.2, 15.0 Hz), 7.19 (dd, 1H,  $J$  = 2.5, 8.9 Hz), 7.12 (d, 1H,  $J$  = 2.3 Hz), 4.08 (t, 2H,  $J$  = 6.6 Hz), 3.29 (t, 2H,  $J$  = 7.4 Hz), 2.86 (t, 2H,  $J$  = 7.3 Hz), 2.34 (d, 6H,  $J$  = 16.4 Hz), 1.84 (m, 2H), 1.48 (m, 2H), 1.35 (m, 4H), 0.91 (t, 3H,  $J$  = 7.1 Hz); <sup>13</sup>C NMR (100 MHz, CDCl<sub>3</sub>) δ 198.39, 159.30, 137.33, 132.01, 131.04, 129.62, 127.64, 127.04, 124.41, 119.98, 106.37, 68.14, 54.45, 45.30, 36.47, 31.52, 29.05, 25.69, 22.54, 13.98; MS (ESI)  $m/z$  328.5 [M+H]<sup>+</sup>.

**Scheme 4.** Synthesis of  $\alpha$ -substituted  $\beta$ -aminoketone <sup>a</sup>

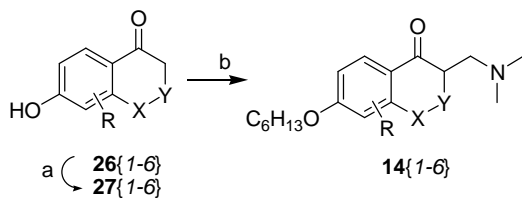

<sup>a</sup>Reagent and condition. (a) *n*HexBr, K<sub>2</sub>CO<sub>3</sub>, DMF, 85 °C; (b) paraformaldehyde, Me<sub>2</sub>NH•HCl, *c*-HCl, H<sub>2</sub>O/MeCN (1/9, v/v), MW, 120 °C, 2 h;

**1-(4-(Hexyloxy)phenyl)propan-1-one 27{1}**. Yield 90%; <sup>1</sup>H NMR (400 MHz, CDCl<sub>3</sub>) δ 7.86 (d, 2H, *J* = 8.8 Hz), 6.84 (d, 2H, *J* = 8.9 Hz), 3.94 (t, 2H, *J* = 6.6 Hz), 2.87 (t, 2H, *J* = 7.3 Hz), 1.72 (m, 2H), 1.38 (m, 2H), 1.27 (m, 4H), 1.14 (t, 3H, *J* = 7.3 Hz), 0.84 (m, 3H); <sup>13</sup>C NMR (100 MHz, CDCl<sub>3</sub>) δ 199.49, 162.94, 130.19, 129.80, 114.12, 68.23, 31.54, 31.38, 29.08, 25.66, 22.58, 14.01, 8.47.

**1-(4-(Hexyloxy)phenyl)-3-methylbutan-1-one 27{2}**. Yield 75%; <sup>1</sup>H NMR (400 MHz, CDCl<sub>3</sub>) δ 7.83 (d, 2H, *J* = 8.9 Hz), 6.82 (d, 2H, *J* = 8.9 Hz), 3.92 (t, 2H, *J* = 6.6 Hz), 2.68 (d, 2H, *J* = 6.9 Hz), 2.18 (m, 1H), 1.70 (m, 2H), 1.36 (m, 2H), 1.25 (m, 4H), 0.89 (d, 6H, *J* = 6.6 Hz), 0.81 (t, 3H, *J* = 7.1 Hz) 218.38, 182.41, 149.83, 149.75, 133.56, 87.70, 66.65, 51.00, 48.54, 45.12, 44.88, 42.27, 42.04, 33.48.

**1-(4-(Hexyloxy)phenyl)-2-phenylethanone 27{3}**. Yield 93% <sup>1</sup>H NMR (400 MHz, CDCl<sub>3</sub>) δ 7.90 (d, 2H, *J* = 8.9 Hz), 7.19 (m, 5H), 6.82 (d, 2H, *J* = 8.9 Hz), 4.14 (s, 2H), 3.92 (t, 2H, *J* = 6.6 Hz), 1.71 (m, 2H), 1.36 (m, 2H), 1.26 (m, 4H), 0.83 (t, 3H, *J* = 7.0 Hz); <sup>13</sup>C NMR (100 MHz, CDCl<sub>3</sub>) δ 215.72, 182.65, 154.51, 150.41, 148.86, 148.09, 146.22, 133.71, 87.74, 64.71, 51.00, 48.52, 45.12, 42.06, 33.50.

**5-(Hexyloxy)-2,3-dihydro-1H-inden-1-one 27{4}**. Yield 91%;  $^1\text{H}$  NMR (400 MHz, )  $\delta$  7.67 (d, 1H,  $J = 9.1$  Hz), 6.89 (m, 2H), 4.02 (t, 2H,  $J = 6.6$  Hz), 3.07 (m, 2H), 2.66 (m, 2H), 1.81 (m, 2H), 1.47 (s, 2H), 1.35 (m, 4H), 0.91 (t, 3H,  $J = 7.0$  Hz);  $^{13}\text{C}$  NMR (100 MHz,  $\text{CDCl}_3$ )  $\delta$  205.25, 164.85, 158.11, 130.17, 125.29, 115.61, 110.23, 77.31, 77.00, 76.68, 68.44, 36.41, 31.49, 29.02, 25.84, 25.63, 22.56, 13.99.

**6-(Hexyloxy)-3,4-dihydronaphthalen-1(2H)-one 27{5}**. Yield 100%;  $^1\text{H}$  NMR (400 MHz,  $\text{CDCl}_3$ )  $\delta$  8.02 (d, 1H,  $J = 8.7$  Hz), 6.83 (dd, 1H,  $J = 2.4, 8.7$  Hz), 6.71 (d, 1H,  $J = 2.1$  Hz), 4.02 (t, 2H,  $J = 6.5$  Hz), 2.93 (t, 2H,  $J = 6.1$  Hz), 2.62 (m, 2H), 2.13 (m, 2H), 1.81 (m, 2H), 1.48 (m, 2H), 1.37 (m, 5H), 0.93 (t, 3H,  $J = 7.0$  Hz);  $^{13}\text{C}$  NMR (100 MHz,  $\text{CDCl}_3$ )  $\delta$  216.69, 182.65, 166.37, 149.07, 145.57, 132.87, 132.59, 87.64, 58.37, 50.98, 49.63, 48.53, 45.11, 42.86, 42.04, 33.48.

**7-(Hexyloxy)chroman-4-one 27{6}**. Yield 89%;  $^1\text{H}$  NMR (400 MHz,  $\text{CDCl}_3$ )  $\delta$  7.80 (d, 1H,  $J = 8.8$  Hz), 6.54 (dd, 1H,  $J = 2.4, 8.8$  Hz), 6.36 (d, 1H,  $J = 2.4$  Hz), 4.48 (m, 2H), 3.95 (t, 2H,  $J = 6.6$  Hz), 2.72 (m, 2H), 1.75 (m, 2H), 1.42 (m, 2H), 1.31 (m, 4H), 0.88 (t, 3H,  $J = 7.0$  Hz).

**3-(Dimethylamino)-1-(4-(hexyloxy)phenyl)-2-methylpropan-1-one 14{1}**. Yield 72%;  $^1\text{H}$  NMR (400 MHz,  $\text{CDCl}_3$ )  $\delta$  7.89 (d, 2H,  $J = 8.8$  Hz), 6.85 (d, 2H,  $J = 8.8$  Hz), 3.94 (t, 2H,  $J = 6.5$  Hz), 3.59 (m, 1H), 2.72 (dd, 1H,  $J = 7.3, 12.3$  Hz), 2.29 (m, 1H), 2.16 (m, 6H), 1.73 (m, 2H), 1.38 (dd, 2H,  $J = 7.1, 14.8$  Hz), 1.27 (m, 4H), 1.12 (d, 3H,  $J = 7.0$  Hz), 0.84 (t, 3H,  $J = 6.9$  Hz);  $^{13}\text{C}$  NMR (100 MHz,  $\text{CDCl}_3$ )  $\delta$  221.31, 182.56, 150.04, 148.75, 133.70, 87.70, 82.27, 65.36, 58.12, 50.98, 48.52, 45.11, 42.03, 36.26, 33.47; MS (ESI)  $m/z$  292.8  $[\text{M}+\text{H}]^+$ .

**2-((Dimethylamino)methyl)-1-(4-(hexyloxy)phenyl)-3-methylbutan-1-one 14{2}**. Yield 50%; <sup>1</sup>H NMR (400 MHz, CDCl<sub>3</sub>) δ 7.89 (d, 2H, *J* = 8.9 Hz), 6.84 (d, 2H, *J* = 8.9 Hz), 3.93 (t, 2H, *J* = 6.6 Hz), 3.38 (m, 1H), 2.88 (m, 1H), 2.29 (m, 1H), 2.07 (s, 6H), 1.90 (m, 1H), 1.72 (m, 2H), 1.39 (m, 2H), 1.27 (m, 4H), 0.85 (m, 9H); <sup>13</sup>C NMR (100 MHz, CDCl<sub>3</sub>) δ 221.28, 182.38, 150.54, 149.96, 133.60, 87.65, 78.84, 69.32, 65.46, 50.98, 49.93, 48.53, 45.11, 42.03, 40.48, 39.38, 33.46; MS (ESI) *m/z* 320.5 [M+H]<sup>+</sup>.

**3-(Dimethylamino)-1-(4-(hexyloxy)phenyl)-2-phenylpropan-1-one 14{3}**. Yield 74%; <sup>1</sup>H NMR (400 MHz, CDCl<sub>3</sub>) δ 7.88 (m, 2H), 7.25 (m, 2H), 7.19 (t, 2H, *J* = 7.7 Hz), 7.10 (t, 1H, *J* = 7.2 Hz), 6.77 (d, 2H, *J* = 8.8 Hz), 4.72 (dd, 1H, *J* = 4.7, 8.8 Hz), 3.88 (m, 2H), 3.28 (dd, 1H, *J* = 8.9, 12.4 Hz), 2.48 (dd, 1H, *J* = 4.7, 12.4 Hz), 2.15 (s, 6H), 1.67 (m, 2H), 1.33 (m, 2H), 1.22 (m, 4H), 0.81 (m, 3H); <sup>13</sup>C NMR (100 MHz, CDCl<sub>3</sub>) δ 216.76, 182.50, 158.09, 150.45, 149.06, 148.36, 147.61, 146.54, 133.63, 87.66, 82.60, 70.85, 65.40, 50.97, 48.49, 45.09, 42.03, 33.48; MS (ESI) *m/z* 354.5 [M+H]<sup>+</sup>.

**2-((Dimethylamino)methyl)-5-(hexyloxy)-2,3-dihydro-1*H*-inden-1-one 14{4}**. Yield 72%; <sup>1</sup>H NMR (400 MHz, CDCl<sub>3</sub>) δ 7.65 (m, 1H), 6.87 (m, 2H), 4.01 (t, 2H, *J* = 6.6 Hz), 3.25 (dd, 1H, *J* = 7.7, 17.5 Hz), 3.01 (dd, 1H, *J* = 3.3, 17.5 Hz), 2.84 (m, 1H), 2.80 (s, 1H), 2.42 (dd, 1H, *J* = 10.5, 12.1 Hz), 2.28 (s, 6H), 1.79 (m, 2H), 1.47 (d, 2H, *J* = 7.0 Hz), 1.33 (m, 4H), 0.90 (m, 3H); <sup>13</sup>C NMR (100 MHz, CDCl<sub>3</sub>) δ 205.69, 165.03, 157.01, 129.57, 125.46, 115.65, 110.17, 68.41, 61.35, 46.57, 45.64, 32.16, 31.89, 31.46, 28.99, 25.60, 22.52, 22.51, 13.96; MS (ESI) *m/z* 290.3 [M+H]<sup>+</sup>.

**2-((Dimethylamino)methyl)-6-(hexyloxy)-3,4-dihydronaphthalen-1(2H)-one 14{5}**. Yield 43%;

$^1\text{H}$  NMR (400 MHz,  $\text{CDCl}_3$ )  $\delta$  7.90 (d, 1H,  $J = 8.8$  Hz), 6.73 (dd, 1H,  $J = 2.5, 8.8$  Hz), 6.61 (d, 1H,  $J = 2.3$  Hz), 3.93 (t, 2H,  $J = 6.6$  Hz), 2.94 (m, 3H), 2.69 (m, 1H), 2.60 (m, 1H), 2.39 (m, 7H), 1.90 (m, 1H), 1.72 (m, 2H), 1.39 (m, 2H), 1.27 (m, 4H), 0.84 (t, 3H,  $J = 7.0$  Hz);  $^{13}\text{C}$  NMR (100 MHz,  $\text{CDCl}_3$ )  $\delta$  197.50, 163.37, 146.58, 129.89, 125.58, 113.71, 112.98, 68.25, 58.95, 45.27, 31.53, 29.07, 28.74, 27.72, 25.66, 22.59, 14.03; MS (ESI)  $m/z$  304.4  $[\text{M}+\text{H}]^+$ .

**3-((Dimethylamino)methyl)-7-(hexyloxy)chroman-4-one 14{6}**. Yield 83%;  $^1\text{H}$  NMR (400 MHz,  $\text{CDCl}_3$ )  $\delta$  7.80 (d, 1H,  $J = 8.8$  Hz), 6.55 (dd, 1H,  $J = 2.4, 8.8$  Hz), 6.38 (d, 1H,  $J = 2.3$  Hz), 4.56 (dd, 1H,  $J = 4.4, 11.3$  Hz), 4.36 (dd, 1H,  $J = 8.1, 11.3$  Hz), 3.97 (t, 2H,  $J = 6.5$  Hz), 2.79 (m, 1H), 2.65 (dd, 1H,  $J = 5.0, 12.6$  Hz), 2.56 (m, 1H), 2.26 (s, 6H), 1.77 (m, 2H), 1.44 (m, 2H), 1.33 (m, 4H), 0.90 (t, 3H,  $J = 6.6$  Hz);  $^{13}\text{C}$  NMR (100 MHz,  $\text{CDCl}_3$ )  $\delta$  192.25, 165.52, 163.54, 128.94, 114.39, 110.32, 101.00, 69.75, 68.42, 56.12, 45.66, 44.08, 31.47, 28.92, 25.59, 22.54, 13.98; MS (ESI)  $m/z$  306.4  $[\text{M}+\text{H}]^+$ .

**Scheme 5.** Synthesis of the different amino Mannich base<sup>a</sup>

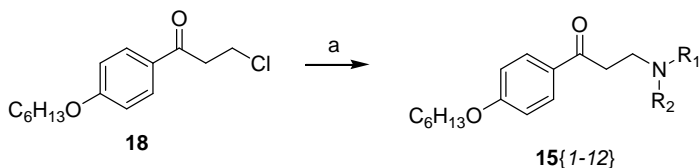

<sup>a</sup>Reagent and condition. (a)  $\text{R}_1\text{R}_2\text{NH}$ , DBU, THF, rt, 1-2 h

**General procedure for 15:** To a solution compound **18** in THF was added the corresponding amine (2 equiv.) in the presence of DBU (2 equiv.) and stirred at rt for 2 h. The reaction mixture



was concentrated in vacuo and purified on normal phase column chromatography (SP1, Biotage) to yield the desired product. **3-(Dibutylamino)-1-(4-(hexyloxy)phenyl)propan-1-one 15{1}**. Yield 45%;  $^1\text{H}$  NMR (400 MHz,  $\text{CDCl}_3$ )  $\delta$  7.87 (t, 2H,  $J = 9.3$  Hz), 6.86 (t, 2H,  $J = 9.6$  Hz), 3.95 (m, 2H), 3.01 (m, 2H), 2.84 (m, 2H), 2.38 (m, 4H), 1.73 (m, 2H), 1.37 (m, 6H), 1.24 (m, 8H), 0.84 (m, 9H);  $^{13}\text{C}$  NMR (100 MHz,  $\text{CDCl}_3$ )  $\delta$  217.88, 182.53, 149.79, 149.38, 133.62, 87.71, 73.31, 68.80, 55.35, 50.99, 48.61, 48.52, 45.11, 42.04, 40.17, 40.16, 33.52, 33.47; MS (ESI)  $m/z$  362.6  $[\text{M}+\text{H}]^+$ .

**1-(4-(Hexyloxy)phenyl)-3-(piperidin-1-yl)propan-1-one 15{2}**. Yield 83%;  $^1\text{H}$  NMR (400 MHz,  $\text{CDCl}_3$ )  $\delta$  7.86 (d, 2H,  $J = 8.9$  Hz), 6.86 (m, 2H), 3.95 (m, 2H), 3.09 (m, 2H), 2.72 (m, 2H), 2.40 (s, 4H), 1.72 (m, 2H), 1.54 (m, 4H), 1.39 (m, 4H), 1.27 (m, 4H), 0.83 (t, 3H,  $J = 7.0$  Hz);  $^{13}\text{C}$  NMR (100 MHz,  $\text{CDCl}_3$ )  $\delta$  217.30, 182.57, 149.77, 149.25, 133.63, 87.71, 74.04, 73.56, 55.34, 50.98, 48.51, 45.34, 45.10, 43.68, 42.03, 33.46; MS (ESI)  $m/z$  318.5  $[\text{M}+\text{H}]^+$ .

**1-(4-(Hexyloxy)phenyl)-3-(pyrrolidin-1-yl)propan-1-one 15{3}**. Yield 63%;  $^1\text{H}$  NMR (400 MHz,  $\text{CDCl}_3$ )  $\delta$  7.98 – 7.77 (m, 2H), 6.86 – 6.65 (m, 2H), 4.07 – 3.77 (m, 2H), 3.15 (t,  $J = 7.6$ , 2H), 2.98 – 2.83 (m, 2H), 2.58 (s, 4H), 1.88 – 1.67 (m, 6H), 1.47 – 1.35 (m, 2H), 1.35 – 1.09 (m, 4H), 0.98 – 0.73 (m, 3H);  $^{13}\text{C}$  NMR (101 MHz,  $\text{CDCl}_3$ )  $\delta$  197.28, 163.21, 130.36, 129.60, 114.22, 68.27, 54.23, 51.10, 37.41, 31.53, 29.06, 25.65, 23.49, 22.58, 14.02; MS (ESI)  $m/z$  304.4  $[\text{M}+\text{H}]^+$ .

**1-(4-(Hexyloxy)phenyl)-3-(2-methylaziridin-1-yl)propan-1-one 15{4}**. Yield 69%;  $^1\text{H}$  NMR (400 MHz,  $\text{CDCl}_3$ )  $\delta$  7.86 (m, 2H), 6.84 (m, 2H), 3.94 (t, 2H,  $J = 6.6$  Hz), 3.12 (m, 2H), 2.58 (m, 2H),

1.72 (m, 2H), 1.37 (m, 4H), 1.27 (m, 4H), 1.21 (d, 1H,  $J = 6.3$  Hz), 1.06 (d, 3H,  $J = 5.3$  Hz), 0.84 (m, 3H) ;  $^{13}\text{C}$  NMR (100 MHz,  $\text{CDCl}_3$ )  $\delta$  217.13, 182.61, 149.83, 149.33, 133.63, 87.71, 75.78, 58.04, 54.33, 50.98, 48.51, 45.09, 42.02, 37.78, 33.46; MS (ESI)  $m/z$  290.4  $[\text{M}+\text{H}]^+$ .

**1-(4-(Hexyloxy)phenyl)-3-(4-methylpiperazin-1-yl)propan-1-one 15{5}**. Yield 84%;  $^1\text{H}$  NMR (400 MHz,  $\text{CDCl}_3$ )  $\delta$  7.92 (d, 2H,  $J = 8.9$  Hz), 6.91 (d, 2H,  $J = 8.9$  Hz), 4.01 (t, 2H,  $J = 6.6$  Hz), 3.13 (t, 2H,  $J = 7.5$  Hz), 2.84 (m, 2H), 2.53 (m, 8H), 2.29 (s, 3H), 1.79 (m, 2H), 1.46 (s, 2H), 1.34 (m, 4H), 0.91 (t, 3H,  $J = 7.0$  Hz) ;  $^{13}\text{C}$  NMR (100 MHz,  $\text{CDCl}_3$ )  $\delta$  217.00, 182.59, 149.73, 149.20, 133.64, 87.71, 74.47, 72.76, 72.55, 65.42, 55.22, 50.97, 48.50, 45.09, 42.02, 33.46; MS (ESI)  $m/z$  3333.5  $[\text{M}+\text{H}]^+$ .

**1-(4-(Hexyloxy)phenyl)-3-(4-phenylpiperazin-1-yl)propan-1-one 15{6}**. Yield 76%;  $^1\text{H}$  NMR (400 MHz,  $\text{CDCl}_3$ )  $\delta$  7.86 (m, 2H), 7.19 (m, 2H), 6.85 (m, 4H), 6.78 (t, 1H,  $J = 7.3$  Hz), 3.94 (t, 2H,  $J = 6.5$  Hz), 3.14 (m, 6H), 2.84 (t, 2H,  $J = 7.4$  Hz), 2.63 (m, 4H), 1.73 (m, 2H), 1.39 (m, 2H), 1.26 (m, 4H), 0.84 (t, 3H,  $J = 6.9$  Hz);  $^{13}\text{C}$  NMR (100 MHz,  $\text{CDCl}_3$ )  $\delta$  197.42, 163.16, 151.16, 130.28, 129.67, 129.06, 119.75, 116.06, 114.18, 68.24, 53.30, 53.21, 49.02, 35.71, 31.49, 29.01, 25.60, 22.53, 13.98; MS (ESI)  $m/z$  395.6  $[\text{M}+\text{H}]^+$ .

**1-(4-(Hexyloxy)phenyl)-3-morpholinopropan-1-one 15{7}**. Yield 66%;  $^1\text{H}$  NMR (400 MHz,  $\text{CDCl}_3$ )  $\delta$  7.85 (d, 2H,  $J = 8.8$  Hz), 6.86 (m, 2H), 3.96 (m, 2H), 3.64 (m, 4H), 3.08 (m, 2H), 2.74 (m, 2H), 2.44 (m, 4H), 1.72 (m, 2H), 1.32 (m, 6H), 0.83 (t, 3H,  $J = 6.9$  Hz);  $^{13}\text{C}$  NMR (100 MHz,  $\text{CDCl}_3$ )  $\delta$  216.89, 182.64, 149.74, 149.16, 133.67, 87.73, 86.36, 73.23, 73.16, 55.01, 50.98, 48.50, 45.10, 42.03, 33.47; MS (ESI)  $m/z$  320.4  $[\text{M}+\text{H}]^+$ .

**1-(4-(Hexyloxy)phenyl)-3-(methyl(phenyl)amino)propan-1-one 15{8}**. Yield 63%; <sup>1</sup>H NMR (400 MHz, CDCl<sub>3</sub>) δ 7.82 (m, 2H), 7.18 (m, 2H), 6.82 (m, 2H), 6.66 (m, 3H), 3.93 (t, 2H, *J* = 6.6 Hz), 3.75 (m, 2H), 3.10 (m, 2H), 2.89 (s, 3H), 1.72 (m, 2H), 1.38 (m, 2H), 1.26 (m, 4H), 0.84 (m, 3H); <sup>13</sup>C NMR (100 MHz, CDCl<sub>3</sub>) δ 197.96, 163.20, 148.56, 130.28, 129.72, 129.29, 116.43, 116.41, 114.16, 112.32, 112.30, 68.24, 48.16, 38.52, 34.68, 31.49, 29.01, 25.60, 22.53, 13.98; MS (ESI) *m/z* 340.5 [M+H]<sup>+</sup>.

**1-(4-(Hexyloxy)phenyl)-3-(phenylamino)propan-1-one 15{9}**. Yield 41%; <sup>1</sup>H NMR (400 MHz, CDCl<sub>3</sub>) δ 7.83 (m, 2H), 7.11 (t, 2H, *J* = 7.7 Hz), 6.83 (m, 2H), 6.64 (m, 1H), 6.59 (d, 2H, *J* = 8.5 Hz), 3.93 (t, 2H, *J* = 6.6 Hz), 3.52 (t, 2H, *J* = 6.1 Hz), 3.16 (t, 2H, *J* = 6.1 Hz), 1.72 (m, 2H), 1.39 (m, 2H), 1.25 (m, 4H), 0.83 (t, 3H, *J* = 6.9 Hz); <sup>13</sup>C NMR (100 MHz, CDCl<sub>3</sub>) δ 197.76, 163.30, 147.45, 130.29, 129.55, 129.30, 117.79, 114.20, 113.29, 68.27, 39.15, 37.11, 31.50, 29.01, 25.61, 22.55, 13.99; MS (ESI) *m/z* 326.4 [M+H]<sup>+</sup>.

**3-(3-Chlorophenylamino)-1-(4-(hexyloxy)phenyl)propan-1-one 15{10}**. Yield 34%; <sup>1</sup>H NMR (400 MHz, CDCl<sub>3</sub>) δ 7.84 (d, 2H, *J* = 8.9 Hz), 6.98 (t, 1H, *J* = 8.0 Hz), 6.83 (m, 2H), 6.58 (m, 1H), 6.54 (m, 1H), 6.42 (dd, 1H, *J* = 1.9, 7.8 Hz), 4.34 (m, 1H), 3.94 (t, 2H, *J* = 6.6 Hz), 3.49 (t, 2H, *J* = 6.0 Hz), 3.14 (t, 2H, *J* = 6.0 Hz), 1.72 (m, 2H), 1.39 (m, 2H), 1.27 (m, 4H), 0.83 (t, 3H, *J* = 6.9 Hz); <sup>13</sup>C NMR (100 MHz, CDCl<sub>3</sub>) δ 217.03, 182.88, 168.38, 154.55, 151.46, 149.84, 149.78, 149.70, 148.95, 136.80, 133.74, 133.65, 133.43, 131.97, 130.97, 87.79, 58.22, 56.41, 50.99, 48.50, 45.10, 42.04, 33.48; MS (ESI) *m/z* 360.9 [M+H]<sup>+</sup>.

**1-(4-(Hexyloxy)phenyl)-3-(1*H*-imidazol-1-yl)propan-1-one 15{11}**. Yield 54%; <sup>1</sup>H NMR (400 MHz, CDCl<sub>3</sub>) δ 7.86 (m, 2H), 7.64 (s, 1H), 7.00 (m, 2H), 6.89 (m, 2H), 4.41 (t, 2H, *J* = 6.5 Hz), 3.99 (t, 2H, *J* = 6.6 Hz), 3.37 (t, 2H, *J* = 6.6 Hz), 1.77 (m, 2H), 1.43 (m, 2H), 1.30 (m, 4H), 0.88 (t, 3H, *J* = 7.0 Hz); <sup>13</sup>C NMR (100 MHz, CDCl<sub>3</sub>) δ 194.92, 163.59, 130.24, 128.99, 114.35, 68.33, 41.73, 39.40, 31.46, 28.97, 25.57, 22.51, 13.94; MS (ESI) *m/z* 301.4 [M+H]<sup>+</sup>.

**1-(3-(4-(Hexyloxy)phenyl)-3-oxopropyl)pyrrolidine-2,5-dione 15{12}**. Yield 65%; <sup>1</sup>H NMR (400 MHz, CDCl<sub>3</sub>) δ 7.81 (d, 2H, *J* = 8.8 Hz), 6.83 (d, 2H, *J* = 8.8 Hz), 3.94 (t, 2H, *J* = 6.6 Hz), 3.86 (t, 2H, *J* = 7.4 Hz), 3.18 (m, 2H), 2.65 (s, 6H), 1.72 (m, 2H), 1.39 (m, 2H), 1.26 (m, 4H), 0.83 (t, 3H, *J* = 7.0 Hz); <sup>13</sup>C NMR (100 MHz, CDCl<sub>3</sub>) δ 215.21, 196.51, 182.80, 149.73, 148.70, 133.71, 87.75, 54.90, 54.05, 50.97, 48.49, 47.64, 45.09, 42.02, 33.47; MS (ESI) *m/z* 332.4 [M+H]<sup>+</sup>.

Scheme 6. Synthesis of hydrophobic side chain modified  $\beta$ -aminophenylketones.

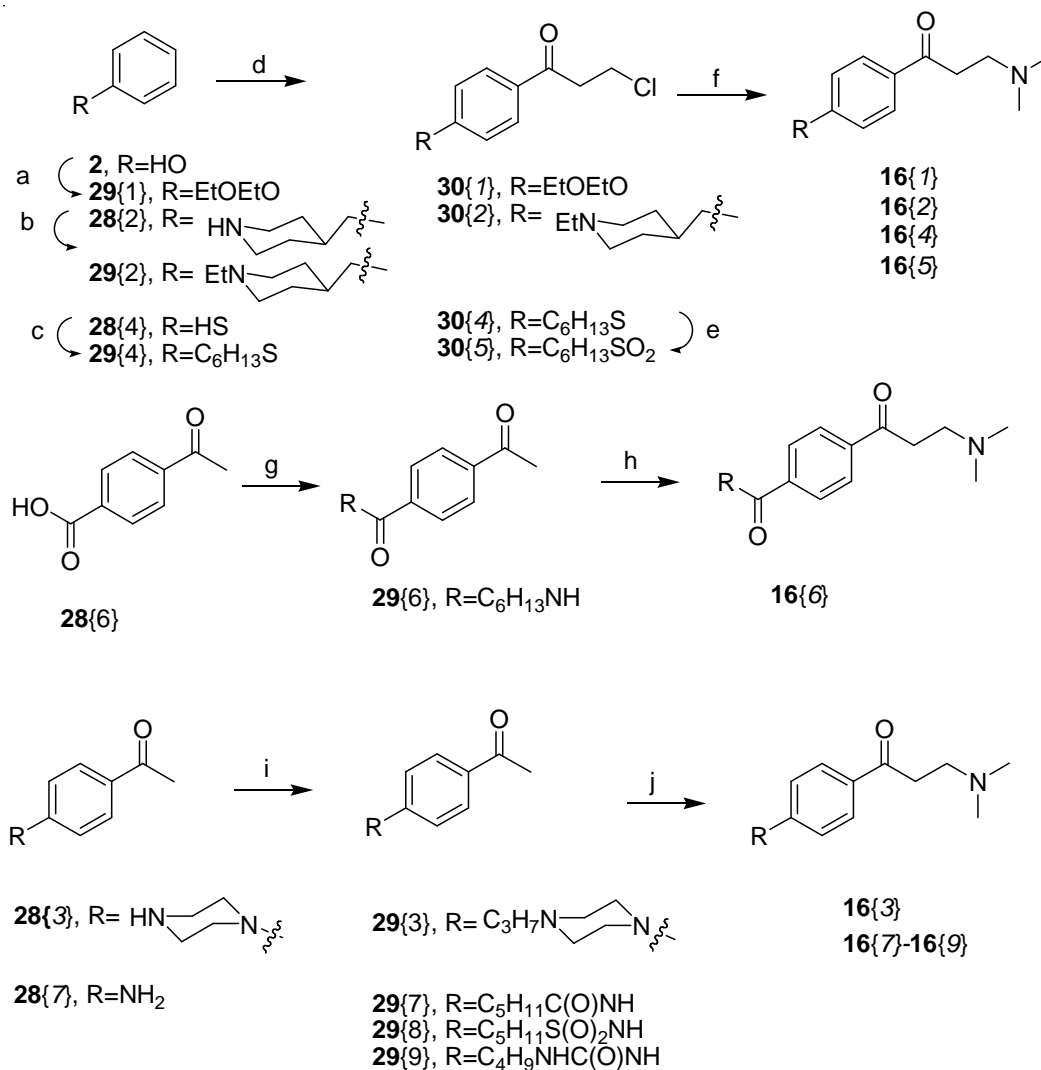

*Reagent and condition.* (a) EtOEtBr, K<sub>2</sub>CO<sub>3</sub>, DMF, 80-90 °C, 12 h; (b) *n*EtI, K<sub>2</sub>CO<sub>3</sub>, DMF; (c) *n*HexBr, K<sub>2</sub>CO<sub>3</sub>, DMF, 80-90 °C, 12 h; (d) 3-chloropropionic chloride, AlCl<sub>3</sub>, DCM, 0 °C, 1 h; (e) *m*CPBA, DCM, 0 °C, 1 h; (f) 2 M Me<sub>2</sub>NH/THF, THF, rt, 1 h; (g) C<sub>6</sub>H<sub>13</sub>NH<sub>2</sub>, DIC, DMAP, DCM, rt; (h) paraformaldehyde, Me<sub>2</sub>NH•HCl, *c*-HCl, H<sub>2</sub>O/MeCN (1/9, v/v), MW, 120 °C, 2 h; (i) RX (*n*C<sub>5</sub>H<sub>12</sub>COCl, *n*C<sub>5</sub>H<sub>12</sub>SO<sub>2</sub>Cl, *n*BuNCO), TEA, DCM, rt.

**Synthesis of compound 29{1}**: To a solution phenol **2** (0.5 g, 5.3 mmol) in DMF was added  $K_2CO_2$  (1.38 g, 10.6 mmol) and ethoxyethylbromide (0.874 mL, 8.0 mmol), and then stirred at 85 °C for overnight. The reaction mixture was poured to water and extracted with  $Et_2O$ . The combined organic layer were washed with brine and dried over  $MgSO_4$  and concentrated in vacuo to yield crude compound **29{1}**. **(2-Ethoxyethoxy)benzene 29{1}**.  $^1H$  NMR (400 MHz,  $CDCl_3$ )  $\delta$  7.28 (m, 2H), 6.94 (m, 3H), 4.13 (m, 2H), 3.80 (m, 2H), 3.61 (m, 2H), 1.26 (m, 3H);  $^{13}C$  NMR (100 MHz,  $CDCl_3$ )  $\delta$  158.81, 129.37, 120.81, 114.64, 68.96, 67.34, 66.83, 15.15.

**4-Benzyl-1-ethylpiperidine 29{2}**.  $^1H$  NMR (400 MHz, )  $\delta$  7.27 – 7.15 (m, 2H), 7.15 – 6.99 (m, 3H), 2.84 (d,  $J = 11.7$ , 2H), 2.45 (d,  $J = 7.1$ , 2H), 2.29 (q,  $J = 7.2$ , 2H), 1.74 (t,  $J = 11.7$ , 2H), 1.56 (d,  $J = 13.0$ , 2H), 1.50 – 1.34 (m, 1H), 1.33 – 1.13 (m, 2H), 1.06 – 0.87 (m, 3H); NMR (101 MHz, )  $\delta$  140.73, 129.10, 128.10, 125.71, 53.50, 52.59, 43.22, 38.00, 32.16, 12.13.

**Synthesis of compound 29{3}**: To a solution amine **28{3}** (0.50g, 2.45 mmol) in DCM were added n-propyl bromide (0.262 mL, 2.69 mmol), and TEA (0.443 mL, 3.19 mmol) and then stirred at rt for 3h. The reaction mixture was washed with water and brine, and dried over  $MgSO_4$ . After concentration under vacuum, the crude mixture was purified on normal phase column chromatography (SP1, Biotage) to yield the desired product. **1-(4-(4-Propylpiperazin-1-yl)phenyl)ethanone 29{3}**. Yield 87%;  $^1H$  NMR (400 MHz,  $CDCl_3$ )  $\delta$  7.83 (d, 2H,  $J = 9.0$  Hz),

6.82 (d, 2H,  $J = 9.1$  Hz), 3.33 (m, 4H), 2.54 (m, 4H), 2.47 (s, 3H), 2.32 (m, 2H), 1.51 (m, 2H), 0.90 (t, 3H,  $J = 7.4$  Hz);  $^{13}\text{C}$  NMR (100 MHz,  $\text{CDCl}_3$ )  $\delta$  196.30, 154.06, 130.23, 127.37, 113.17, 60.46, 52.75, 47.18, 25.99, 19.88, 11.82.

**Synthesis of compound 29{4}**: To a solution thiophenol **28{4}** (2.0 g, 18.2 mmol) in DMF was added  $\text{K}_2\text{CO}_2$  (3.26 g, 23.6 mmol) and *n*-hexylbromide (2.95 mL, 23.6 mmol) and then stirred at 85 °C for overnight. The reaction mixture was poured to water and extracted with  $\text{Et}_2\text{O}$ . The combined organic layer were washed with brine and dried over  $\text{MgSO}_4$  and concentrated in vacuo to yield crude compound **29{4}**. **Hexyl(phenyl)sulfane 29{4}**  $^1\text{H}$  NMR (400 MHz,  $\text{CDCl}_3$ )  $\delta$  7.33 (m, 4H), 7.19 (m, 1H), 2.95 (m, 2H), 1.68 (m, 2H), 1.46 (m, 2H), 1.33 (m, 4H), 0.92 (t, 3H,  $J = 7.0$  Hz);  $^{13}\text{C}$  NMR (100 MHz,  $\text{CDCl}_3$ )  $\delta$  137.04, 128.82, 128.78, 125.60, 33.58, 31.35, 29.11, 28.52, 22.52, 14.00.

**Synthesis of compound 29{6}**: To a solution phenol **28{6}** (0.5 g, 3.05 mmol) in DCM were added *n*-hexylamine (0.52 mL, 3.96 mmol), DIC (0.613 mL, 3.96 mmol), and DMAP (cat.) and then stirred at rt for 3h. The reaction mixture was washed with water and brine, and dried over  $\text{MgSO}_4$ . After concentration under vacuum, the crude mixture was purified on normal phase column chromatography (SP1, Biotage) to yield the desired product **29{6}**. **4-Acetyl-*N*-hexylbenzamide 29{6}**. Yield 57%;  $^1\text{H}$  NMR (400 MHz,  $\text{CDCl}_3$ )  $\delta$  7.94 (d, 2H,  $J = 8.3$  Hz), 7.81 (d, 2H,  $J = 8.3$  Hz), 6.48 (s, 1H), 3.42 (m, 2H), 2.59 (s, 3H), 1.58 (m, 2H), 1.29 (m, 7H), 0.85 (s, 3H);  $^{13}\text{C}$  NMR (100 MHz,  $\text{CDCl}_3$ )  $\delta$  197.43, 166.49, 138.91, 138.74, 128.38, 127.15, 40.24, 31.42, 29.48, 26.72, 26.60, 22.48, 13.94.

**Synthesis of compound 29{7}:** To a solution phenol **28{7}** (0.5 g, 3.70 mmol) in DCM were added n-pentanoic acid (0.60 mL, 4.81 mmol), DIC (0.745 mL, 4.81 mmol), and DMAP (cat.) and then stirred at rt for 3h. The reaction mixture was washed with water and brine, and dried over MgSO<sub>4</sub>. After concentration under vacuum, the crude mixture was purified on normal phase column chromatography (SP1, Biotage) to yield the desired product **29{7}**. *N*-(4-Acetylphenyl)hexanamide **29{7}**. Yield 59%; <sup>1</sup>H NMR (400 MHz, CDCl<sub>3</sub>) δ 7.92 (m, 2H), 7.71 (s, 1H), 7.64 (d, 2H, *J* = 8.7 Hz), 2.59 (s, 3H), 2.39 (m, 2H), 1.73 (m, 2H), 1.34 (m, 4H), 0.89 (t, 3H, *J* = 7.1 Hz); <sup>13</sup>C NMR (100 MHz, CDCl<sub>3</sub>) δ 197.05, 171.84, 142.45, 132.66, 129.70, 118.81, 37.79, 31.35, 31.34, 26.41, 25.11, 22.37, 22.36, 13.87, 13.86.

**Synthesis of compound 29{8}:** To a solution phenol **28{8}** (0.20 g, 1.48 mmol) in DCM were added n-pentane sulfonyl chloride (0.26 mL, 1.78 mmol), and TEA (0.31 mL, 2.22 mmol) and then stirred at rt for 3h. The reaction mixture was washed with water and brine, and dried over MgSO<sub>4</sub>. After concentration under vacuum, the crude mixture was purified on normal phase column chromatography (SP1, Biotage) to yield the desired product **29{8}**. *N*-(4-Acetylphenyl)pentane-1-sulfonamide **29{8}**. Yield 45%; <sup>1</sup>H NMR (400 MHz, CDCl<sub>3</sub>) δ 7.95 (m, 2H), 7.47 (s, 1H), 7.28 (m, 2H), 3.17 (m, 2H), 2.61 (s, 3H), 1.82 (m, 2H), 1.32 (m, 4H), 0.85 (t, 3H, *J* = 7.2 Hz); <sup>13</sup>C NMR (100 MHz, CDCl<sub>3</sub>) δ 196.89, 141.64, 133.03, 130.29, 117.98, 52.19, 30.09, 26.41, 23.07, 22.01, 13.59.

**Synthesis of compound 29{9}:** To a solution amine **28{9}** (0.50 g, 3.70 mmol) in DCM was added n-butane isocyanate (0.50 mL, 4.44 mmol) and then stirred at rt for 3h. The reaction mixture was washed with water and brine, and dried over MgSO<sub>4</sub>. After concentration under vacuum, the



crude mixture was purified on normal phase column chromatography (SP1, Biotage) to yield the desired product. **1-(4-Acetylphenyl)-3-butylurea 29{9}**. Yield 24%;  $^1\text{H}$  NMR (400 MHz,  $\text{CDCl}_3$ )  $\delta$  8.10 (s, 1H), 7.76 (d, 2H,  $J = 8.7$  Hz), 7.35 (d, 2H,  $J = 8.7$  Hz), 5.86 (t, 1H,  $J = 5.4$  Hz), 3.15 (m, 2H), 2.46 (s, 3H), 1.40 (m, 3H), 1.24 (m, 3H), 0.81 (t, 3H,  $J = 7.3$  Hz);  $^{13}\text{C}$  NMR (100 MHz,  $\text{CDCl}_3$ )  $\delta$  217.14, 175.25, 164.06, 150.29, 149.38, 137.19, 59.35, 51.58, 45.84, 39.50, 33.20.

**3-Chloro-1-(4-(2-ethoxyethoxy)phenyl)propan-1-one 30{1}**.  $^1\text{H}$  NMR (400 MHz,  $\text{CDCl}_3$ )  $\delta$  7.92 (m, 2H), 6.96 (m, 2H), 4.18 (d, 2H,  $J = 5.4$  Hz), 3.90 (t, 2H,  $J = 6.9$  Hz), 3.81 (d, 2H,  $J = 5.4$  Hz), 3.60 (m, 2H), 3.40 (t, 2H,  $J = 6.9$  Hz), 1.24 (t, 3H,  $J = 7.0$  Hz);  $^{13}\text{C}$  NMR (100 MHz,  $\text{CDCl}_3$ )  $\delta$  195.19, 163.10, 130.28, 129.56, 114.45, 68.64, 67.70, 66.92, 40.89, 38.93, 15.09.

**3-Chloro-1-(4-((1-ethylpiperidin-4-yl)methyl)phenyl)propan-1-one 30{2}**.  $^1\text{H}$  NMR (400 MHz, )  $\delta$  7.85 (d,  $J = 8.4$ , 2H), 7.28 (d, 2H), 3.87 (t,  $J = 6.7$ , 2H), 3.51 (d,  $J = 11.9$ , 2H), 3.46 – 3.30 (m, 2H), 3.10 – 2.96 (m, 2H), 2.66 (d,  $J = 6.9$ , 2H), 2.63 – 2.44 (m, 2H), 2.16 – 1.95 (m, 2H), 1.80 (d,  $J = 11.8$ , 3H), 1.41 (t,  $J = 7.3$ , 3H).

**3-Chloro-1-(4-(hexylthio)phenyl)propan-1-one 30{4}**.  $^1\text{H}$  NMR (400 MHz,  $\text{CDCl}_3$ )  $\delta$  7.68 (d, 2H,  $J = 8.5$  Hz), 7.13 (d, 2H,  $J = 8.6$  Hz), 3.74 (t, 2H,  $J = 6.9$  Hz), 3.24 (t, 2H,  $J = 6.8$  Hz), 2.82 (m, 2H), 1.53 (m, 2H), 1.29 (s, 2H), 1.14 (m, 4H), 0.72 (t, 3H,  $J = 6.8$  Hz);  $^{13}\text{C}$  NMR (100 MHz,  $\text{CDCl}_3$ )  $\delta$  195.66, 145.81, 132.81, 128.43, 126.20, 41.03, 38.78, 31.87, 31.30, 28.65, 28.55, 22.49, 13.98.

**3-Chloro-1-(4-(hexylsulfonyl)phenyl)propan-1-on 30{5}**. **Beta-chloro/enone =1:0.3**  $^1\text{H}$  NMR (400 MHz,  $\text{CDCl}_3$ )  $\delta$  8.12 (d, 2H,  $J = 8.3$  Hz), 8.02 (d, 2H,  $J = 8.3$  Hz), 3.93 (t, 2H,  $J = 6.6$  Hz),

3.50 (t, 2H,  $J = 6.6$  Hz), 3.10 (m, 2H), 1.70 (m, 2H), 1.36 (m, 2H), 1.24 (m, 4H), 0.85 (t, 3H,  $J = 6.8$  Hz).

**3-(Dimethylamino)-1-(4-(2-ethoxyethoxy)phenyl)propan-1-one 16{1}**. Yield 91%;  $^1\text{H}$  NMR (400 MHz,  $\text{CDCl}_3$ )  $\delta$  7.91 (m, 2H), 6.93 (m, 2H), 4.15 (dd, 2H,  $J = 4.2, 5.5$  Hz), 3.77 (m, 2H), 3.57 (m, 2H), 3.09 (t, 2H,  $J = 7.4$  Hz), 2.73 (m, 2H), 2.28 (s, 6H), 1.21 (m, 3H);  $^{13}\text{C}$  NMR (100 MHz,  $\text{CDCl}_3$ )  $\delta$  197.40, 162.71, 130.19, 130.00, 114.27, 68.61, 67.59, 66.83, 54.39, 45.29, 36.30, 15.05; MS (ESI)  $m/z$  266.4  $[\text{M}+\text{H}]^+$ .

**3-(Dimethylamino)-1-(4-((1-ethylpiperidin-4-yl)methyl)phenyl)propan-1-one 16{2}**.  $^1\text{H}$  NMR (400 MHz,  $\text{CDCl}_3$ )  $\delta$  7.87 (d, 2H,  $J = 9.1$  Hz), 6.85 (d, 2H,  $J = 9.0$  Hz), 3.46 (s, 1H), 3.37 (m, 4H), 3.26 (t, 2H,  $J = 7.3$  Hz), 3.02 (t, 2H,  $J = 7.3$  Hz), 2.58 (m, 4H), 2.47 (s, 5H), 2.35 (m, 3H), 1.54 (m, 2H), 0.92 (t, 3H,  $J = 7.4$  Hz);  $^{13}\text{C}$  NMR (100 MHz,  $\text{CDCl}_3$ )  $\delta$  195.79, 154.31, 130.24, 126.45, 113.27, 60.47, 53.79, 52.72, 47.05, 44.34, 34.82, 19.84, 11.87; MS (ESI)  $m/z$  303.4  $[\text{M}+\text{H}]^+$ .

**3-(Dimethylamino)-1-(4-(4-propylpiperazin-1-yl)phenyl)propan-1-one 16{3}**. Yield 32%;  $^1\text{H}$  NMR (400 MHz,  $\text{CDCl}_3$ )  $\delta$  7.87 (d, 2H,  $J = 9.1$  Hz), 6.85 (d, 2H,  $J = 9.0$  Hz), 3.37 (m, 4H), 3.26 (t, 2H,  $J = 7.3$  Hz), 3.02 (t, 2H,  $J = 7.3$  Hz), 2.58 (m, 4H), 2.48 (s, 6H), 2.34 (m, 2H), 1.54 (m, 2H), 0.92 (t, 3H,  $J = 7.4$  Hz);  $^{13}\text{C}$  NMR (100 MHz,  $\text{CDCl}_3$ )  $\delta$  195.79, 154.31, 130.24, 126.45, 113.27, 60.47, 53.79, 52.72, 47.05, 44.34, 34.82, 19.84, 11.87; MS (ESI)  $m/z$  304.3  $[\text{M}+\text{H}]^+$ .

**3-(Dimethylamino)-1-(4-(hexylthio)phenyl)propan-1-one 16{4}**. Yield 95%;  $^1\text{H}$  NMR (400 MHz,  $\text{CDCl}_3$ )  $\delta$  7.75 (m, 2H), 7.22 (d, 2H,  $J = 8.3$  Hz), 3.07 (m, 2H), 2.89 (m, 2H), 2.70 (t, 2H,  $J =$

7.4), 2.23 (m, 6H), 1.62 (m, 2H), 1.38 (m, 2H), 1.23 (m, 4H), 0.82 (t, 3H,  $J = 6.7$  Hz);  $^{13}\text{C}$  NMR (100 MHz,  $\text{CDCl}_3$ )  $\delta$  197.94, 144.99, 133.33, 128.42, 126.20, 54.36, 45.40, 36.55, 31.89, 31.25, 28.64, 28.50, 22.44, 13.93; MS (ESI)  $m/z$  294.5  $[\text{M}+\text{H}]^+$ .

**3-(Dimethylamino)-1-(4-(hexylsulfonyl)phenyl)propan-1-one 16{5}**. Yield 90%;  $^1\text{H}$  NMR (400 MHz,  $\text{CDCl}_3$ )  $\delta$  8.11 (d, 2H,  $J = 8.7$  Hz), 7.97 (d, 2H,  $J = 8.6$  Hz), 3.23 (s, 1H), 3.07 (m, 2H), 2.83 (d, 2H,  $J = 6.3$  Hz), 2.34 (s, 6H), 1.66 (m, 2H), 1.33 (m, 2H), 1.22 (s, 4H), 0.82 (t, 3H,  $J = 6.9$  Hz);  $^{13}\text{C}$  NMR (100 MHz,  $\text{CDCl}_3$ )  $\delta$  197.44, 142.95, 140.41, 128.76, 128.47, 56.12, 53.62, 53.58, 45.06, 31.04, 27.83, 22.46, 22.18, 13.80; MS (ESI)  $m/z$  326.4  $[\text{M}+\text{H}]^+$ .

**4-(3-(Dimethylamino)propanoyl)-*N*-hexylbenzamide 16{6}**. Yield 27%;  $^1\text{H}$  NMR (400 MHz,  $\text{CDCl}_3$ )  $\delta$  7.96 (d, 2H,  $J = 8.4$  Hz), 7.82 (d, 2H,  $J = 8.3$  Hz), 6.38 (s, 1H), 3.43 (m, 2H), 3.16 (t, 2H,  $J = 7.3$  Hz), 2.76 (t, 2H,  $J = 7.2$  Hz), 2.27 (s, 6H), 1.60 (m, 2H), 1.33 (m, 6H), 0.88 (m, 3H);  $^{13}\text{C}$  NMR (100 MHz,  $\text{CDCl}_3$ )  $\delta$  198.36, 166.46, 138.75, 128.18, 127.18, 54.13, 45.39, 40.23, 37.04, 31.43, 29.51, 26.61, 22.49, 13.96; MS (ESI)  $m/z$  305.4  $[\text{M}+\text{H}]^+$ .

***N*-(4-(3-(Dimethylamino)propanoyl)phenyl)hexanamide 16{7}**. Yield 25%;  $^1\text{H}$  NMR (400 MHz,  $\text{CDCl}_3$ )  $\delta$  8.21 (s, 1H), 7.87 (d, 2H,  $J = 8.7$  Hz), 7.63 (d, 2H,  $J = 8.7$  Hz), 3.17 (t, 2H,  $J = 7.3$  Hz), 2.85 (t, 2H,  $J = 7.3$  Hz), 2.34 (m, 8H), 1.69 (m, 2H), 1.30 (m, 4H), 0.86 (t, 3H,  $J = 7.1$  Hz);  $^{13}\text{C}$  NMR (100 MHz,  $\text{CDCl}_3$ )  $\delta$  197.13, 172.05, 142.85, 131.94, 129.38, 118.90, 53.82, 44.74, 37.66, 35.72, 31.34, 25.09, 22.35, 13.85; MS (ESI)  $m/z$  291.4  $[\text{M}+\text{H}]^+$ .

***N*-(4-(3-(Dimethylamino)propanoyl)phenyl)pentane-1-sulfonamide 16{8}**. Yield 36%;  $^1\text{H}$  NMR (400 MHz,  $\text{CDCl}_3$ )  $\delta$  8.75 (s, 1H), 7.81 (d, 2H,  $J = 8.7$  Hz), 7.20 (d, 2H,  $J = 8.6$  Hz), 3.09 (m, 4H),

2.84 (t, 2H,  $J = 7.2$  Hz), 2.36 (s, 6H), 1.73 (m, 2H), 1.23 (m, 4H), 0.79 (m, 3H);  $^{13}\text{C}$  NMR (100 MHz,  $\text{CDCl}_3$ )  $\delta$  196.20, 142.70, 131.69, 129.93, 118.04, 53.67, 52.23, 44.54, 35.16, 30.13, 23.03, 22.03, 13.63; MS (ESI)  $m/z$  327.4  $[\text{M}+\text{H}]^+$ .

**1-Butyl-3-(4-(3-(dimethylamino)propanoyl)phenyl)urea 16{9}**. Yield 18%;  $^1\text{H}$  NMR (400 MHz,  $\text{CDCl}_3$ )  $\delta$  8.49 (s, 1H), 7.70 (m, 2H), 7.43 (m, 2H), 6.15 (s, 1H), 3.20 (m, 2H), 3.11 (t, 2H,  $J = 7.1$  Hz), 2.86 (m, 2H), 2.39 (s, 6H), 1.45 (m, 2H), 1.30 (m, 2H), 0.87 (m, 3H);  $^{13}\text{C}$  NMR (100 MHz,  $\text{CDCl}_3$ )  $\delta$  197.20, 155.74, 145.00, 129.85, 129.51, 117.59, 54.30, 45.04, 39.78, 35.50, 32.10, 20.03, 13.73; MS (ESI)  $m/z$  292.4  $[\text{M}+\text{H}]^+$ .

Scheme 7. Synthesis of the second generated compounds

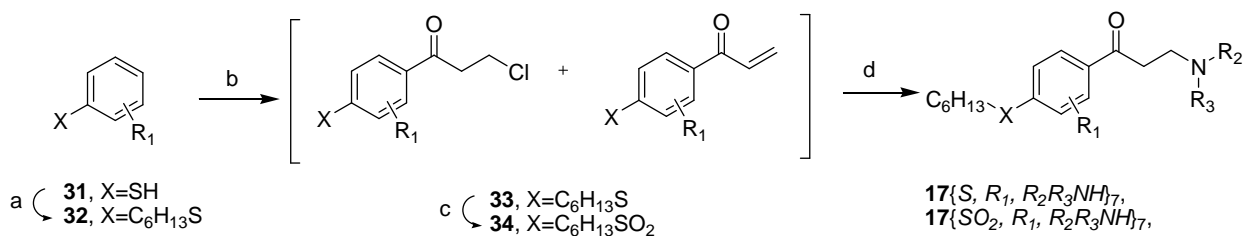

<sup>a</sup>Reagent and condition. (a) nHexBr, K<sub>2</sub>CO<sub>3</sub>, DMF, 85 °C; (b) RCH<sub>2</sub>C(O)Cl, AlCl<sub>3</sub>, DCM, 0 °C, 2 h; (c) *m*CPBA, DCM, 0 °C, 1 h (d) R<sub>2</sub>R<sub>3</sub>NH, DCM, rt, 1 h

**(3-Chlorophenyl)(hexyl)sulfane 32{1}**. <sup>1</sup>H NMR (400 MHz, CDCl<sub>3</sub>) δ 11.39 (m, 1H), 11.30 (m, 1H), 11.24 (m, 1H), 7.04 (m, 2H), 5.78 (m, 2H), 5.56 (m, 2H), 5.42 (m, 4H), 5.01 (t, 3H, *J* = 6.9 Hz); <sup>13</sup>C NMR (100 MHz, CDCl<sub>3</sub>) δ 139.43, 134.60, 129.75, 127.87, 126.38, 125.55, 33.24, 31.30, 28.87, 28.47, 22.50, 13.98.

**(2,3-Dichlorophenyl)(hexyl)sulfane 32{2}**. <sup>1</sup>H NMR (400 MHz, CDCl<sub>3</sub>) δ 7.34 (m, 1H), 7.22 (m, 2H), 3.02 (m, 2H), 1.80 (m, 2H), 1.57 (m, 2H), 1.41 (m, 4H), 0.99 (t, 3H, *J* = 6.9 Hz); <sup>13</sup>C NMR (100 MHz, CDCl<sub>3</sub>) δ 139.56, 133.42, 130.41, 127.20, 126.46, 124.90, 32.61, 31.33, 28.64, 28.33, 22.49, 13.99.

**(2,5-Dichlorophenyl)(hexyl)sulfane 32{3}**. <sup>1</sup>H NMR (400 MHz, CDCl<sub>3</sub>) δ 7.28 (d, *J* = 8.5, 1H), 7.19 (d, *J* = 2.4, 1H), 7.07 (dd, *J* = 2.4, 8.5, 1H), 2.97 – 2.92 (m, 2H), 1.78 – 1.68 (m, 2H), 1.59 – 1.42 (m, 2H), 1.42 – 1.28 (m, 4H), 0.98 – 0.84 (m, 3H).

**(3,5-Dichlorophenyl)(hexyl)sulfane 32{4}**.  $^1\text{H}$  NMR (400 MHz,  $\text{CDCl}_3$ )  $\delta$  7.13 (s, 2H), 2.92 (m, 2H), 1.66 (m, 2H), 1.43 (m, 2H), 1.30 (m, 4H), 0.89 (t, 3H,  $J = 7.0$  Hz);  $^{13}\text{C}$  NMR (100 MHz,  $\text{CDCl}_3$ )  $\delta$  141.26, 135.08, 125.64, 125.33, 32.95, 31.25, 28.63, 28.44, 22.48, 13.97.

**(3,5-Dimethylphenyl)(hexyl)sulfane 32{5}**.  $^1\text{H}$  NMR (400 MHz,  $\text{CDCl}_3$ )  $\delta$  6.95 (s, 2H), 6.79 (s, 1H), 2.90 (m, 2H), 2.28 (m, 6H), 1.64 (m, 2H), 1.43 (m, 2H), 1.30 (m, 4H), 0.89 (t, 3H,  $J = 6.5$  Hz);  $^{13}\text{C}$  NMR (100 MHz,  $\text{CDCl}_3$ )  $\delta$  138.36, 136.54, 127.51, 126.45, 33.52, 31.35, 29.14, 28.53, 22.52, 21.21, 14.00.

**3-Chloro-1-(2-chloro-4-(hexylthio)phenyl)propan-1-one 33{1}**. Yield 70%;  $^1\text{H}$  NMR (400 MHz, )  $\delta$  7.53 (d, 1H,  $J = 8.3$  Hz), 7.26 (d, 1H,  $J = 1.9$  Hz), 7.18 (dd, 1H,  $J = 1.8, 8.3$  Hz), 3.88 (t, 2H,  $J = 6.7$  Hz), 3.45 (t, 2H,  $J = 6.6$  Hz), 2.97 (m, 2H), 1.69 (m, 2H), 1.45 (m, 2H), 1.31 (m, 4H), 0.90 (t, 3H,  $J = 6.8$  Hz);  $^{13}\text{C}$  NMR (100 MHz,  $\text{CDCl}_3$ )  $\delta$  197.89, 144.86, 133.84, 132.32, 130.18, 127.99, 124.96, 45.22, 38.74, 32.11, 31.25, 28.53, 28.48, 22.47, 13.96.

**3-Chloro-1-(2,3-dichloro-4-(hexylthio)phenyl)propan-1-one 33{2}**. Yield 64%;  $^1\text{H}$  NMR (400 MHz,  $\text{CDCl}_3$ )  $\delta$  7.34 (d, 1H,  $J = 8.3$  Hz), 7.07 (d, 1H,  $J = 8.4$  Hz), 3.81 (t, 2H,  $J = 6.6$  Hz), 3.36 (t, 2H,  $J = 6.6$  Hz), 2.90 (m, 2H), 1.68 (m, 2H), 1.42 (m, 2H), 1.26 (m, 4H), 0.84 (t, 3H,  $J = 6.9$  Hz);  $^{13}\text{C}$  NMR (100 MHz,  $\text{CDCl}_3$ )  $\delta$  198.18, 144.43, 135.91, 135.61, 131.78, 127.05, 123.15, 45.32, 38.66, 32.19, 31.29, 28.63, 28.04, 22.46, 13.97.

**3-Chloro-1-(2,3-dichloro-4-(hexylthio)phenyl)propan-1-one 33{3}**. Yield 63%;  $^1\text{H}$  NMR (400 MHz,  $\text{CDCl}_3$ )  $\delta$  7.64 (s, 1H), 7.19 (s, 1H), 3.90 (t,  $J = 6.6$ , 2H), 3.47 (t,  $J = 6.6$ , 2H), 2.99 (t,  $J = 7.4$ , 2H), 1.83 – 1.71 (m, 2H), 1.61 – 1.46 (m, 2H), 1.42 – 1.30 (m, 4H), 0.94 (t,  $J = 7.0$ , 3H).

**3-Chloro-1-(2,6-dichloro-4-(hexylthio)phenyl)propan-1-one 33{4}**. Yield 55%;  $^1\text{H}$  NMR (400 MHz,  $\text{CDCl}_3$ )  $\delta$  7.17 (d, 2H,  $J = 8.9$  Hz), 3.87 (t, 2H,  $J = 6.8$  Hz), 3.29 (t, 2H,  $J = 6.8$  Hz), 2.94 (m, 2H), 1.66 (m, 2H), 1.44 (s, 2H), 1.31 (m, 4H), 0.89 (t, 3H,  $J = 6.8$  Hz);  $^{13}\text{C}$  NMR (100 MHz,  $\text{CDCl}_3$ )  $\delta$  198.54, 142.76, 135.01, 130.75, 126.10, 46.36, 37.23, 32.58, 31.22, 28.41, 22.46, 13.96.

**3-Chloro-1-(4-(hexylthio)-2,6-dimethylphenyl)propan-1-one 33{5}**. Yield 29%;  $^1\text{H}$  NMR (400 MHz,  $\text{CDCl}_3$ )  $\delta$  6.84 (d, 2H,  $J = 7.3$  Hz), 3.76 (t, 2H,  $J = 6.4$  Hz), 3.04 (t, 2H,  $J = 6.4$  Hz), 2.80 (m, 2H), 2.10 (s, 6H), 1.53 (m, 2H), 1.32 (m, 2H), 1.19 (m, 4H), 0.78 (t, 3H,  $J = 6.9$  Hz).

**1-(2-Chloro-4-(hexylsulfonyl)phenyl)prop-2-en-1-one 34{1}**. Yield 89%;  $^1\text{H}$  NMR (400 MHz,  $\text{CDCl}_3$ )  $\delta$  7.98 (d, 1H,  $J = 1.4$  Hz), 7.86 (dd, 1H,  $J = 1.7, 7.9$  Hz), 7.55 (d, 1H,  $J = 8.0$  Hz), 6.73 (dd, 1H,  $J = 10.6, 17.6$  Hz), 6.17 (d, 1H,  $J = 10.6$  Hz), 6.10 (d, 1H,  $J = 17.6$  Hz), 3.11 (m, 2H), 1.71 (m, 2H), 1.38 (m, 2H), 1.25 (m, 4H), 0.87 (t, 3H,  $J = 6.9$  Hz).

**1-(2,3-Dichloro-4-(hexylsulfonyl)phenyl)prop-2-en-1-one 34{2}**. Yield 70%;  $^1\text{H}$  NMR (400 MHz,  $\text{CDCl}_3$ )  $\delta$  8.07 (d, 1H,  $J = 8.1$  Hz), 7.36 (t, 1H,  $J = 7.4$  Hz), 6.62 (dd, 1H,  $J = 10.6, 17.6$  Hz), 6.15 (d, 1H,  $J = 10.8$  Hz), 6.01 (d, 1H,  $J = 17.6$  Hz), 3.36 (m, 2H), 1.63 (m, 2H), 1.34 (m, 2H), 1.21 (m, 4H), 0.80 (t, 3H,  $J = 6.9$  Hz).

**3-chloro-1-(2,5-dichloro-4-(hexylsulfonyl)phenyl)propan-1-one 34{3}**. Yield 84%;  $^1\text{H}$  NMR (400 MHz,  $\text{CDCl}_3$ )  $\delta$  8.12 (s, 1H), 7.57 (s, 1H), 3.82 (t,  $J = 6.4$ , 2H), 3.41 – 3.28 (m, 4H), 1.65 (dt,  $J = 7.7, 15.5$ , 2H), 1.39 – 1.30 (m, 2H), 1.22 (dd, 4H), 0.81 (t,  $J = 6.9$ , 3H).

**1-(2,6-Dichloro-4-(hexylsulfonyl)phenyl)prop-2-en-1-one 34{4}**. Yield 63%;  $^1\text{H}$  NMR (400 MHz,  $\text{CDCl}_3$ )  $\delta$  7.87 (s, 1H), 6.60 (dd, 1H,  $J = 10.6, 17.7$  Hz), 6.27 (d, 1H,  $J = 10.6$  Hz), 5.98 (d, 1H,  $J = 17.7$  Hz), 3.11 (m, 2H), 1.73 (m, 2H), 1.39 (m, 2H), 1.28 (m, 4H), 0.87 (t, 3H,  $J = 6.9$  Hz).

**1-(4-(Hexylsulfonyl)-2,6-dimethylphenyl)prop-2-en-1-one 34{5}**. Yield 75%;  $^1\text{H}$  NMR (400 MHz,  $\text{CDCl}_3$ )  $\delta$  7.57 (s, 2H), 6.57 (dd, 1H,  $J = 10.5, 17.7$  Hz), 6.19 (d, 1H,  $J = 10.5$  Hz), 5.85 (d, 1H,  $J = 17.7$  Hz), 3.06 (m, 2H), 2.25 (s, 6H), 1.70 (m, 2H), 0.85 (t, 3H,  $J = 6.8$  Hz).

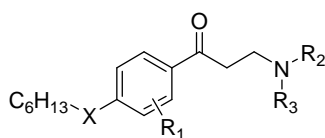

$17\{\text{S}, R_1, R_2R_3\text{NH}\}_7$ ,  $17\{\text{SO}_2, R_1, R_2R_3\text{NH}\}_7$ ,

$17\{1,1,1\}$

Same with  $12\{11\}$

**1-(2-Chloro-4-(hexyloxy)phenyl)-3-(2-methylaziridin-1-yl)propan-1-one 17{1,1,2}**. Yield 87%;  $^1\text{H}$  NMR (400 MHz,  $\text{CDCl}_3$ )  $\delta$  7.64 (d,  $J = 8.7$ , 1H), 6.93 (d,  $J = 2.4$ , 1H), 6.82 (dd,  $J = 2.4, 8.7$ , 1H), 3.99 (t,  $J = 6.5$ , 2H), 3.24 (t,  $J = 7.1$ , 2H), 2.71 – 2.52 (m, 2H), 1.84 – 1.71 (m, 2H), 1.52 – 1.41 (m, 4H), 1.40 – 1.30 (m, 4H), 1.15 (t,  $J = 6.3$ , 3H), 0.91 (t,  $J = 6.9$ , 3H);  $^{13}\text{C}$  NMR (101 MHz,  $\text{CDCl}_3$ )  $\delta$  199.80, 161.78, 133.48, 131.70, 130.52, 116.58, 113.13, 68.59, 56.14, 42.85, 34.90, 34.87, 31.49, 28.95, 25.59, 22.57, 18.32, 14.02; MS (ESI)  $m/z$  324.4  $[\text{M}+\text{H}]^+$ .

**1-(2-Chloro-4-(hexyloxy)phenyl)-3-morpholinopropan-1-one 17{1,1,3}**. Yield 75%;  $^1\text{H}$  NMR (400 MHz,  $\text{CDCl}_3$ )  $\delta$  7.57 (d,  $J = 8.7$ , 1H), 6.92 (d,  $J = 2.4$ , 1H), 6.82 (dd,  $J = 2.4, 8.7$ , 1H), 3.98 (t,



$J = 6.5$ , 2H), 3.76 – 3.63 (m, 4H), 3.16 (t,  $J = 7.2$ , 2H), 2.79 (t,  $J = 7.2$ , 2H), 2.56 – 2.43 (m, 4H), 1.84 – 1.68 (m, 2H), 1.53 – 1.40 (m, 2H), 1.40 – 1.27 (m, 4H), 0.91 (t,  $J = 7.0$ , 3H);  $^{13}\text{C}$  NMR (101 MHz,  $\text{C CDCl}_3$ )  $\delta$  200.14, 161.72, 133.20, 131.53, 130.65, 116.42, 113.18, 68.60, 66.90, 53.81, 53.53, 39.88, 31.49, 28.96, 25.60, 22.57, 14.02; MS (ESI)  $m/z$  354.4  $[\text{M}+\text{H}]^+$ .

**4-(3-(2-Chloro-4-(hexyloxy)phenyl)-3-oxopropyl)piperazin-2-one 17{1,1,4}**. Yield 100%;  $^1\text{H}$  NMR (400 MHz,  $\text{CDCl}_3$ )  $\delta$  7.58 (d,  $J = 8.7$ , 1H), 6.92 (brs, 2H), 6.82 (dd,  $J = 2.3$ , 8.7, 1H), 3.98 (t,  $J = 6.5$ , 2H), 3.39 (brs, 2H), 3.22 – 3.13 (m, 4H), 2.86 (t,  $J = 7.0$ , 2H), 2.75 (brs, 2H), 1.85 – 1.71 (m, 2H), 1.54 – 1.40 (m, 2H), 1.40 – 1.26 (m, 4H), 0.91 (t,  $J = 6.7$ , 3H);  $^{13}\text{C}$  NMR (101 MHz,  $\text{CDCl}_3$ )  $\delta$  199.52, 169.49, 161.88, 133.30, 131.64, 130.33, 116.51, 113.28, 68.63, 56.71, 52.45, 49.09, 41.21, 40.02, 31.48, 28.94, 25.59, 22.56, 14.02; MS (ESI)  $m/z$  367.4  $[\text{M}+\text{H}]^+$ .

**3-(4-Acetylpiperazin-1-yl)-1-(2-chloro-4-(hexyloxy)phenyl)propan-1-one 17{1,1,5}**. Yield 100%;  $^1\text{H}$  NMR (400 MHz,  $\text{CDCl}_3$ )  $\delta$  7.56 (d,  $J = 8.7$ , 1H), 6.91 (s, 1H), 6.81 (dd,  $J = 2.3$ , 8.7, 1H), 3.97 (t,  $J = 6.5$ , 2H), 3.57 (brs, 2H), 3.47 – 3.35 (m, 2H), 3.15 (t,  $J = 7.1$ , 2H), 2.79 (t,  $J = 7.0$ , 2H), 2.51 – 2.36 (m, 4H), 2.06 (s, 3H), 1.83 – 1.69 (m, 2H), 1.51 – 1.39 (m, 2H), 1.39 – 1.25 (m, 4H), 0.90 (t,  $J = 6.3$ , 3H);  $^{13}\text{C}$  NMR (101 MHz,  $\text{CDCl}_3$ )  $\delta$  199.99, 168.89, 161.76, 133.21, 131.52, 130.53, 116.46, 113.19, 68.61, 53.27, 53.16, 52.58, 46.21, 41.31, 39.98, 31.48, 28.94, 25.58, 22.55, 21.31, 14.01; MS (ESI)  $m/z$  395.4  $[\text{M}+\text{H}]^+$ .

**1-(2-Chloro-4-(hexyloxy)phenyl)-3-(4-(ethylsulfonyl)piperazin-1-yl)propan-1-one 17{1,1,6}**.

Yield 85%;  $^1\text{H}$  NMR (400 MHz,  $\text{CDCl}_3$ )  $\delta$  7.57 (d,  $J = 8.7$ , 1H), 6.93 (d,  $J = 2.4$ , 1H), 6.83 (dd,  $J = 2.4$ , 8.7, 1H), 3.99 (t,  $J = 6.5$ , 2H), 3.37 – 3.24 (m, 4H), 3.15 (t,  $J = 7.1$ , 2H), 2.94 (q,  $J = 7.4$ , 2H),

2.84 (t,  $J = 7.1$ , 2H), 2.60 – 2.51 (m, 4H), 1.80 (dd,  $J = 7.3$ , 14.3, 2H), 1.45 (dd,  $J = 6.3$ , 14.0, 2H), 1.35 (dt,  $J = 7.3$ , 10.2, 7H), 0.91 (t,  $J = 7.0$ , 3H);  $^{13}\text{C}$  NMR (101 MHz,  $\text{CDCl}_3$ )  $\delta$  199.84, 161.80, 133.24, 131.54, 130.46, 116.49, 113.22, 68.63, 53.11, 52.64, 45.71, 43.75, 39.90, 31.49, 28.95, 25.59, 22.57, 14.02, 7.79; MS (ESI)  $m/z$  345.5  $[\text{M}+\text{H}]^+$ .

**17**{1,2,1} Same with **12**{24}

**1-(2,3-Dichloro-4-(hexyloxy)phenyl)-3-(2-methylaziridin-1-yl)propan-1-one** **17**{1,2,2}. Yield 99%;  $^1\text{H}$  NMR (400 MHz,  $\text{CDCl}_3$ )  $\delta$  7.40 (d,  $J = 8.7$ , 1H), 6.79 (d,  $J = 8.7$ , 1H), 4.00 (t,  $J = 6.5$ , 2H), 3.13 (t,  $J = 7.0$ , 2H), 2.64 – 2.48 (m, 2H), 1.86 – 1.70 (m, 2H), 1.49 – 1.34 (m, 3H), 1.34 – 1.23 (m, 4H), 1.07 (t,  $J = 5.7$ , 3H), 0.84 (t,  $J = 7.1$ , 3H);  $^{13}\text{C}$  NMR (101 MHz,  $\text{CDCl}_3$ )  $\delta$  200.23, 157.71, 132.62, 131.47, 128.13, 123.35, 110.29, 77.39, 77.07, 76.75, 69.74, 56.01, 43.10, 34.92, 34.89, 31.43, 28.85, 25.55, 22.55, 18.31, 14.00; MS (ESI)  $m/z$  358.3  $[\text{M}+\text{H}]^+$ .

**1-(2,3-Dichloro-4-(hexyloxy)phenyl)-3-morpholinopropan-1-one** **17**{1,2,3}. Yield 100%;  $^1\text{H}$  NMR (400 MHz,  $\text{CDCl}_3$ )  $\delta$  7.34 (d,  $J = 8.7$ , 1H), 6.79 (d,  $J = 8.7$ , 1H), 4.00 (t,  $J = 6.5$ , 2H), 3.65 – 3.53 (m, 4H), 3.06 (t,  $J = 7.1$ , 2H), 2.69 (t,  $J = 7.1$ , 2H), 2.43 – 2.32 (m, 4H), 1.85 – 1.70 (m, 2H), 1.49 – 1.35 (m, 2H), 1.35 – 1.19 (m, 4H), 0.84 (t,  $J = 7.1$ , 3H);  $^{13}\text{C}$  NMR (101 MHz,  $\text{CDCl}_3$ )  $\delta$  200.63, 157.63, 132.72, 131.22, 127.95, 123.20, 110.34, 69.75, 66.88, 53.78, 53.49, 40.12, 31.44, 28.86, 25.56, 22.55, 14.01; MS (ESI)  $m/z$  388.3  $[\text{M}+\text{H}]^+$ .

**4-(3-(2,3-Dichloro-4-(hexyloxy)phenyl)-3-oxopropyl)piperazin-2-one** **17**{1,2,4}. Yield 99%;  $^1\text{H}$  NMR (400 MHz,  $\text{CDCl}_3$ )  $\delta$  7.42 (d,  $J = 8.7$ , 1H), 6.90 (s, 1H), 6.87 (d,  $J = 8.7$ , 1H), 4.08 (t,  $J = 6.4$ ,

2H), 3.33 (brs, 2H), 3.19 – 3.08 (m, 4H), 2.91 – 2.82 (m, 2H), 2.72 (brs, 2H), 1.92 – 1.80 (m, 2H), 1.57 – 1.43 (m, 2H), 1.43 (brs, 4H), 0.97 – 0.82 (m, 3H);  $^{13}\text{C}$  NMR (101 MHz,  $\text{CDCl}_3$ )  $\delta$  200.01, 169.42, 157.79, 132.39, 131.26, 128.08, 123.28, 110.42, 69.78, 56.70, 52.40, 49.01, 41.20, 40.27, 31.43, 28.84, 25.55, 22.55, 14.01; MS (ESI)  $m/z$  401.3  $[\text{M}+\text{H}]^+$ .

**3-(4-Acetylpiperazin-1-yl)-1-(2,3-dichloro-4-(hexyloxy)phenyl)propan-1-one 17{1,2,5}**. Yield 100%;  $^1\text{H}$  NMR (400 MHz,  $\text{CDCl}_3$ )  $\delta$  7.34 (d,  $J = 8.7$ , 1H), 6.79 (d,  $J = 8.7$ , 1H), 4.00 (t,  $J = 6.5$ , 2H), 3.50 (brs, 2H), 3.42 – 3.30 (m, 2H), 3.06 (t,  $J = 7.0$ , 2H), 2.72 (t,  $J = 7.0$ , 2H), 2.44 – 2.28 (m, 4H), 2.00 (s, 3H), 1.85 – 1.71 (m, 2H), 1.52 – 1.37 (m, 2H), 1.35 – 1.23 (m, 4H), 0.84 (t,  $J = 6.5$ , 3H);  $^{13}\text{C}$  NMR (101 MHz,  $\text{CDCl}_3$ )  $\delta$  200.43, 168.90, 157.68, 132.59, 131.24, 127.96, 123.25, 110.34, 69.77, 53.23, 53.12, 52.56, 46.19, 41.29, 40.23, 31.42, 28.84, 25.55, 22.54, 21.31, 14.00; MS (ESI)  $m/z$  429.4  $[\text{M}+\text{H}]^+$ .

**1-(2,3-Dichloro-4-(hexyloxy)phenyl)-3-(4-(ethylsulfonyl)piperazin-1-yl)propan-1-one**

**17{1,2,6}**. Yield 100%;  $^1\text{H}$  NMR (400 MHz,  $\text{CDCl}_3$ )  $\delta$  7.33 (d,  $J = 8.7$ , 1H), 6.80 (d,  $J = 8.7$ , 1H), 4.00 (t,  $J = 6.5$ , 2H), 3.27 – 3.13 (m, 4H), 3.05 (t,  $J = 7.0$ , 2H), 2.87 (q,  $J = 7.4$ , 2H), 2.74 (t,  $J = 7.0$ , 2H), 2.53 – 2.38 (m, 4H), 1.85 – 1.69 (m, 2H), 1.50 – 1.36 (m, 2H), 1.36 – 1.25 (m, 7H), 0.84 (t,  $J = 7.0$ , 3H);  $^{13}\text{C}$  NMR (101 MHz,  $\text{CDCl}_3$ )  $\delta$  200.28, 157.71, 132.51, 131.28, 127.95, 123.29, 110.34, 69.78, 53.07, 52.61, 45.70, 43.77, 40.16, 31.43, 28.85, 25.56, 22.55, 14.01, 7.79; MS (ESI)  $m/z$  479.5  $[\text{M}+\text{H}]^+$ .

**17{1,3,1}**

Same with **12**{25}

**1-(2,5-Dichloro-4-(hexyloxy)phenyl)-3-(2-methylaziridin-1-yl)propan-1-one 17**{1,3,2}. Yield 72%;  $^1\text{H}$  NMR (400 MHz,  $\text{CDCl}_3$ )  $\delta$  7.65 (s, 1H), 6.85 (s, 1H), 3.98 (t,  $J = 6.5$ , 2H), 3.15 (t,  $J = 7.1$ , 2H), 2.63 – 2.46 (m, 2H), 1.88 – 1.72 (m, 2H), 1.51 – 1.34 (m, 3H), 1.34 – 1.24 (m, 4H), 1.07 (d,  $J = 5.3$ , 3H), 0.84 (dd,  $J = 4.5$ , 9.7, 3H);  $^{13}\text{C}$  NMR (101 MHz,  $\text{CDCl}_3$ )  $\delta$  198.77, 156.97, 131.56, 131.52, 130.77, 121.70, 114.84, 69.74, 56.02, 42.90, 34.94, 31.42, 28.77, 25.51, 22.54, 18.31, 14.00; MS (ESI)  $m/z$  358.3  $[\text{M}+\text{H}]^+$ .

**1-(2,5-Dichloro-4-(hexyloxy)phenyl)-3-morpholinopropan-1-one 17**{1,3,3}. Yield 100%;  $^1\text{H}$  NMR (400 MHz,  $\text{CDCl}_3$ )  $\delta$  7.59 (s, 1H), 6.84 (s, 1H), 3.98 (t,  $J = 6.5$ , 2H), 3.69 – 3.56 (m, 4H), 3.07 (t,  $J = 7.1$ , 2H), 2.70 (t,  $J = 7.1$ , 2H), 2.40 (brs, 4H), 1.85 – 1.75 (m, 2H), 1.43 (s, 2H), 1.35 – 1.22 (m, 4H), 0.84 (t,  $J = 7.0$ , 3H);  $^{13}\text{C}$  NMR (101 MHz,  $\text{CDCl}_3$ )  $\delta$  199.22, 168.32, 156.85, 131.38, 131.16, 130.92, 121.71, 114.70, 69.75, 66.94, 53.73, 53.54, 39.98, 31.42, 28.77, 25.51, 22.54, 14.00; MS (ESI)  $m/z$  388.3  $[\text{M}+\text{H}]^+$ .

**4-(3-(2,5-Dichloro-4-(hexyloxy)phenyl)-3-oxopropyl)piperazin-2-one 17**{1,3,4}. Yield 91%;  $^1\text{H}$  NMR (400 MHz,  $\text{CDCl}_3$ )  $\delta$  7.67 (s, 1H), 6.93 (s, 1H), 6.72 (br, 1H), 4.07 (t,  $J = 6.5$ , 2H), 3.41 – 3.29 (m, 2H), 3.20 – 3.08 (m, 4H), 2.87 (t,  $J = 7.0$ , 2H), 2.74 – 2.65 (m, 2H), 1.94 – 1.80 (m, 2H), 1.56 – 1.45 (m, 2H), 1.43 – 1.28 (m, 4H), 0.92 (t,  $J = 7.0$ , 3H);  $^{13}\text{C}$  NMR (101 MHz,  $\text{CDCl}_3$ )  $\delta$  198.41, 169.35, 157.05, 131.45, 131.38, 130.53, 121.84, 114.78, 69.78, 56.72, 52.34, 49.16, 41.26, 40.11, 31.41, 28.75, 25.51, 22.54, 14.00; MS (ESI)  $m/z$  401.3  $[\text{M}+\text{H}]^+$ .

**3-(4-Acetylpiperazin-1-yl)-1-(2,5-dichloro-4-(hexyloxy)phenyl)propan-1-one** **17**{1,3,5}. Yield 35%; <sup>1</sup>H NMR (400 MHz, CDCl<sub>3</sub>) δ 7.67 (s, 1H), 6.94 (s, 1H), 4.08 (t, *J* = 6.5, 2H), 3.65 – 3.53 (m, 2H), 3.53 – 3.44 (m, 2H), 3.16 (t, *J* = 7.0, 2H), 2.87 – 2.76 (m, 2H), 2.57 – 2.36 (m, 4H), 2.05 (s, 3H), 1.94 – 1.84 (m, 2H), 1.57 – 1.45 (m, 2H), 1.45 – 1.27 (m, 4H), 0.93 (t, *J* = 7.0, 3H); <sup>13</sup>C NMR (101 MHz, CDCl<sub>3</sub>) δ 199.00, 168.90, 156.89, 131.35, 131.20, 130.76, 121.69, 114.73, 69.75, 53.18, 53.16, 52.58, 46.23, 41.33, 40.06, 31.40, 28.75, 25.49, 22.52, 21.31, 13.99; MS (ESI) *m/z* 429.4 [M+H]<sup>+</sup>.

**1-(2,5-Dichloro-4-(hexyloxy)phenyl)-3-(4-(ethylsulfonyl)piperazin-1-yl)propan-1-one**

**17**{1,3,6}. Yield 100%; <sup>1</sup>H NMR (400 MHz, CDCl<sub>3</sub>) δ 7.57 (s, 1H), 6.85 (s, 1H), 3.99 (t, *J* = 6.5, 2H), 3.26 – 3.18 (m, 4H), 3.06 (t, *J* = 7.0, 2H), 2.87 (q, *J* = 7.4, 2H), 2.75 (t, *J* = 7.0, 2H), 2.50 – 2.41 (m, 4H), 1.87 – 1.73 (m, 2H), 1.47 – 1.36 (m, 2H), 1.36 – 1.23 (m, 7H), 0.84 (t, *J* = 7.1, 3H); <sup>13</sup>C NMR (101 MHz, CDCl<sub>3</sub>) δ 198.95, 156.93, 131.40, 131.21, 130.77, 121.72, 114.73, 69.78, 53.05, 52.66, 45.74, 43.71, 39.99, 31.42, 28.77, 25.52, 22.54, 14.01, 7.79; MS (ESI) *m/z* 479.5 [M+H]<sup>+</sup>.

**17**{1,4,1}

Same with **12**{26}

**1-(3,5-Dichloro-4-(hexyloxy)phenyl)-3-(2-methylaziridin-1-yl)propan-1-one** **17**{1,4,2}. Yield 85%; <sup>1</sup>H NMR (400 MHz, CDCl<sub>3</sub>) δ 6.76 (s, 2H), 3.87 (t, *J* = 6.5, 2H), 3.04 (t, *J* = 7.3, 2H), 2.58 (t, *J* = 7.3, 2H), 1.74 – 1.63 (m, 2H), 1.44 – 1.32 (m, 3H), 1.32 – 1.20 (m, 4H), 1.13 – 1.03 (m, 3H),

0.84 (t,  $J = 7.0$ , 3H);  $^{13}\text{C}$  NMR (101 MHz,  $\text{CDCl}_3$ )  $\delta$  201.11, 159.93, 131.93, 131.06, 114.54, 84.67, 68.86, 54.68, 44.53, 34.91, 34.86, 31.46, 28.87, 25.56, 22.57, 18.32, 14.01; MS (ESI)  $m/z$  358.3  $[\text{M}+\text{H}]^+$ .

**1-(3,5-Dichloro-4-(hexyloxy)phenyl)-3-(morpholino)propan-1-one 17{1,4,3}**

Yield 81%;  $^1\text{H}$  NMR (400 MHz,  $\text{CDCl}_3$ )  $\delta$  6.76 (s, 2H), 3.87 (t,  $J = 6.5$ , 2H), 3.67 – 3.54 (m, 4H), 2.96 (t,  $J = 7.3$ , 2H), 2.73 (t,  $J = 7.3$ , 2H), 2.48 – 2.34 (m, 4H), 1.78 – 1.62 (m, 3H), 1.44 – 1.33 (m, 2H), 1.33 – 1.21 (m, 4H), 0.90 – 0.74 (m, 3H);  $^{13}\text{C}$  NMR (101 MHz,  $\text{CDCl}_3$ )  $\delta$  201.23, 159.93, 131.89, 131.17, 114.56, 68.88, 66.91, 53.73, 53.58, 52.63, 41.48, 31.46, 28.87, 25.55, 22.56, 14.02; MS (ESI)  $m/z$  388.3  $[\text{M}+\text{H}]^+$ .

**4-(3-(3,5-Dichloro-4-(hexyloxy)phenyl)-3-oxopropyl)piperazin-2-one 17{1,4,4}**. Yield 70%;

$^1\text{H}$  NMR (400 MHz,  $\text{CDCl}_3$ )  $\delta$  6.85 (s, 2H), 6.68 (s, 1H), 3.95 (t,  $J = 6.5$ , 2H), 3.36 (brs, 2H), 3.17 (s, 2H), 3.04 (t,  $J = 7.0$ , 2H), 2.89 (t,  $J = 7.0$ , 2H), 2.76 – 2.64 (m, 2H), 1.83 – 1.72 (m, 2H), 1.50 – 1.40 (m, 2H), 1.40 – 1.29 (m,  $J = 8.7$ , 4H), 0.92 (t,  $J = 7.0$ , 3H);  $^{13}\text{C}$  NMR (101 MHz,  $\text{CDCl}_3$ )  $\delta$  200.75, 169.36, 160.03, 131.61, 131.16, 114.61, 68.90, 56.75, 51.27, 49.15, 41.61, 41.27, 31.45, 28.86, 25.55, 22.56, 14.02; MS (ESI)  $m/z$  401.3  $[\text{M}+\text{H}]^+$ .

**3-(4-Acetylpiperazin-1-yl)-1-(3,5-dichloro-4-(hexyloxy)phenyl)propan-1-one 17{1,4,5}**. Yield

52%;  $^1\text{H}$  NMR (400 MHz,  $\text{CDCl}_3$ )  $\delta$  6.85 (s, 2H), 3.95 (t,  $J = 6.5$ , 2H), 3.64 – 3.54 (m, 2H), 3.50 – 3.40 (m, 2H), 3.04 (t,  $J = 7.2$ , 2H), 2.83 (t,  $J = 7.2$ , 2H), 2.54 – 2.37 (m, 4H), 2.10 (s, 3H), 1.82 – 1.72 (m, 2H), 1.50 – 1.40 (m, 2H), 1.40 – 1.28 (m, 4H), 0.95 – 0.86 (m, 3H);  $^{13}\text{C}$  NMR (101 MHz,

CDCl<sub>3</sub>)  $\delta$  201.10, 168.92, 159.97, 131.78, 131.17, 114.57, 68.89, 53.25, 52.61, 52.09, 46.21, 41.62, 41.32, 31.45, 28.86, 25.55, 22.56, 21.33, 14.01; MS (ESI)  $m/z$  429.4 [M+H]<sup>+</sup>.

**1-(3,5-Dichloro-4-(hexyloxy)phenyl)-3-(4-(ethylsulfonyl)piperazin-1-yl)propan-1-one**

**17{1,4,6}**.

Yield 63%; <sup>1</sup>H NMR (400 MHz, CDCl<sub>3</sub>)  $\delta$  6.77 (s, 2H), 3.87 (t,  $J$  = 6.5, 2H), 3.30 – 3.15 (m, 4H), 2.94 (t,  $J$  = 7.1, 2H), 2.87 (q,  $J$  = 7.4, 2H), 2.78 (t,  $J$  = 7.1, 2H), 2.58 – 2.41 (m, 4H), 1.75 – 1.64 (m, 2H), 1.42 – 1.32 (m, 2H), 1.32 – 1.21 (m, 7H), 0.84 (t,  $J$  = 7.0, 3H); <sup>13</sup>C NMR (101 MHz, CDCl<sub>3</sub>)  $\delta$  200.95, 159.99, 131.74, 131.17, 114.59, 68.91, 52.69, 51.92, 45.71, 43.78, 41.52, 31.46, 28.87, 25.55, 22.56, 14.02, 7.80; MS (ESI)  $m/z$  479.5 [M+H]<sup>+</sup>.

**17{1,5,1}**

Same with **12{22}**

**1-(4-(Hexyloxy)-2,6-dimethylphenyl)-3-(2-methylaziridin-1-yl)propan-1-one** **17{1,5,2}**. Yield 62%; <sup>1</sup>H NMR (400 MHz, CDCl<sub>3</sub>)  $\delta$  6.56 (s, 2H), 3.94 (t,  $J$  = 6.6, 2H), 3.03 – 2.93 (m, 2H), 2.70 – 2.55 (m, 2H), 2.22 (d,  $J$  = 13.8, 6H), 1.81 – 1.65 (m, 2H), 1.50 – 1.41 (m, 4H), 1.41 – 1.25 (m, 5H), 1.17 (d,  $J$  = 5.1, 3H), 0.92 (t,  $J$  = 7.0, 3H); <sup>13</sup>C NMR (101 MHz, CDCl<sub>3</sub>)  $\delta$  209.00, 159.06, 134.90, 134.61, 113.73, 67.87, 55.13, 45.39, 34.94, 34.85, 31.58, 29.22, 25.72, 22.62, 19.60, 18.34, 14.05; MS (ESI)  $m/z$  346.3 [M+H]<sup>+</sup>.

**1-(4-(Hexyloxy)-2,6-dimethylphenyl)-3-morpholinopropan-1-one** **17{1,5,3}**. Yield 71%; <sup>1</sup>H NMR (400 MHz, CDCl<sub>3</sub>)  $\delta$  6.56 (s, 2H), 3.94 (t,  $J$  = 6.6, 2H), 3.77 – 3.66 (m, 4H), 2.91 (t,  $J$  = 7.0,

2H), 2.78 (t,  $J = 7.2$ , 2H), 2.48 (brs, 4H), 2.24 (s, 6H), 1.84 – 1.70 (m, 2H), 1.51 – 1.40 (m, 2H), 1.40 – 1.29 (m, 4H), 0.92 (t,  $J = 7.0$ , 3H);  $^{13}\text{C}$  NMR (101 MHz,  $\text{CDCl}_3$ )  $\delta$  208.99, 159.11, 134.79, 113.78, 67.88, 66.85, 53.68, 53.32, 42.21, 31.58, 29.21, 25.71, 22.62, 19.75, 14.05; MS (ESI)  $m/z$  348.5  $[\text{M}+\text{H}]^+$ .

**4-(3-(4-(Hexyloxy)-2,6-dimethylphenyl)-3-oxopropyl)piperazin-2-one** **17**{1,5,4}. Yield 49%;

$^1\text{H}$  NMR (400 MHz,  $\text{CDCl}_3$ )  $\delta$  6.47 (s, 2H), 6.35 (brs, 1H), 3.86 (t,  $J = 6.6$ , 2H), 3.35 (brs, 2H), 3.10 (s, 2H), 2.88 – 2.75 (m, 4H), 2.70 – 2.59 (m, 2H), 2.15 (s, 6H), 1.75 – 1.63 (m, 2H), 1.44 – 1.31 (m, 2H), 1.31 – 1.21 (m, 4H), 0.84 (t,  $J = 7.0$ , 3H);  $^{13}\text{C}$  NMR (101 MHz,  $\text{CDCl}_3$ )  $\delta$  208.39, 159.22, 134.79, 134.47, 113.86, 67.90, 56.69, 51.99, 49.28, 42.31, 41.14, 31.57, 29.20, 25.71, 22.62, 19.72, 14.05; MS (ESI)  $m/z$  361.5  $[\text{M}+\text{H}]^+$ .

**3-(4-Acetylpiperazin-1-yl)-1-(4-(hexyloxy)-2,6-dimethylphenyl)propan-1-one** **17**{1,5,5}. Yield

71%;  $^1\text{H}$  NMR (400 MHz,  $\text{CDCl}_3$ )  $\delta$  6.55 (s, 2H), 3.93 (t,  $J = 6.6$ , 2H), 3.64 – 3.54 (m, 2H), 3.50 – 3.39 (m, 2H), 2.90 (t,  $J = 6.8$ , 2H), 2.79 (t,  $J = 7.0$ , 2H), 2.52 – 2.46 (m, 2H), 2.46 – 2.40 (m, 2H), 2.23 (s, 6H), 2.08 (s, 3H), 1.81 – 1.67 (m, 2H), 1.50 – 1.39 (m,  $J = 14.0$ , 2H), 1.39 – 1.26 (m, 4H), 0.91 (t,  $J = 7.0$ , 3H);  $^{13}\text{C}$  NMR (101 MHz,  $\text{CDCl}_3$ )  $\delta$  208.84, 168.94, 159.15, 134.78, 134.69, 113.81, 67.89, 53.39, 52.76, 52.70, 46.16, 42.39, 41.26, 31.57, 29.20, 25.70, 22.61, 21.31, 19.77, 14.05; MS (ESI)  $m/z$  389.6  $[\text{M}+\text{H}]^+$ .

**3-(4-(Ethylsulfonyl)piperazin-1-yl)-1-(4-(hexyloxy)-2,6-dimethylphenyl)propan-1-one**

**17**{1,5,6}. Yield 29%;  $^1\text{H}$  NMR (400 MHz,  $\text{CDCl}_3$ )  $\delta$  6.56 (s, 2H), 3.94 (t,  $J = 6.6$ , 2H), 3.32 (brs, 4H), 2.97 (q,  $J = 7.4$ , 2H), 2.93 – 2.80 (m, 4H), 2.59 (s, 4H), 2.24 (s, 6H), 1.85 – 1.70 (m, 2H),  
S64



1.53 – 1.42 (m, 2H), 1.42 – 1.31 (m,  $J = 6.9, 14.3, 7\text{H}$ ), 0.92 (t,  $J = 7.0, 3\text{H}$ );  $^{13}\text{C}$  NMR (101 MHz,  $\text{CDCl}_3$ )  $\delta$  208.58, 159.19, 134.77, 134.60, 113.83, 67.91, 52.83, 52.59, 45.60, 43.92, 42.23, 31.57, 29.21, 25.71, 22.62, 19.78, 14.05, 7.81; MS (ESI)  $m/z$  439.6  $[\text{M}+\text{H}]^+$ .

**1-(2-Chloro-4-(hexylthio)phenyl)-3-(dimethylamino)propan-1-one 17{2,1,1}**. Yield 89%;  $^1\text{H}$  NMR (400 MHz,  $\text{CDCl}_3$ )  $\delta$  7.39 (d, 1H,  $J = 8.2$  Hz), 7.19 (t, 1H,  $J = 5.1$  Hz), 7.10 (m, 1H), 3.06 (t, 2H,  $J = 7.3$  Hz), 2.88 (t, 2H,  $J = 7.4$  Hz), 2.64 (t, 2H,  $J = 7.3$  Hz), 2.18 (s, 6H), 1.61 (m, 2H), 1.37 (m, 2H), 1.23 (m, 4H), 0.82 (t, 3H,  $J = 6.8$  Hz);  $^{13}\text{C}$  NMR (100 MHz,  $\text{CDCl}_3$ )  $\delta$  200.81, 143.68, 134.95, 131.84, 129.80, 128.05, 125.06, 54.25, 45.29, 40.92, 32.23, 31.22, 28.55, 28.44, 22.44, 13.93; MS (ESI)  $m/z$  328.8  $[\text{M}+\text{H}]^+$ .

**1-(2-Chloro-4-(hexylthio)phenyl)-3-(2-methylaziridin-1-yl)propan-1-one 17{2,1,2}**. Yield 85%;  $^1\text{H}$  NMR (400 MHz,  $\text{CDCl}_3$ )  $\delta$  7.51 (d,  $J = 8.2$ , 1H), 7.26 (d,  $J = 1.8$ , 1H), 7.17 (dd,  $J = 1.8, 8.2$ , 1H), 3.26 – 3.19 (m, 2H), 2.98 – 2.92 (m, 2H), 2.68 – 2.58 (m, 2H), 1.74 – 1.63 (m, 2H), 1.52 – 1.39 (m, 4H), 1.37 – 1.25 (m, 5H), 1.15 (t,  $J = 5.4$ , 3H), 0.96 (t,  $J = 7.0$ , 3H);  $^{13}\text{C}$  NMR (101 MHz,  $\text{CDCl}_3$ )  $\delta$  200.53, 143.94, 134.85, 132.12, 129.95, 128.16, 125.04, 55.94, 43.03, 34.92, 34.89, 32.24, 31.29, 28.60, 28.50, 22.50, 18.31, 14.00; MS (ESI)  $m/z$  340.4  $[\text{M}+\text{H}]^+$ .

**1-(2-Chloro-4-(hexylthio)phenyl)-3-morpholinopropan-1-one 17{2,1,3}**. Yield 82%;  $^1\text{H}$  NMR (400 MHz,  $\text{CDCl}_3$ )  $\delta$  7.46 (d,  $J = 8.2$ , 1H), 7.26 (s, 1H), 7.17 (d,  $J = 8.2$ , 1H), 3.69 (brs, 5H), 3.16 (t,  $J = 7.0$ , 2H), 2.97 (t,  $J = 7.4$ , 2H), 2.78 (t,  $J = 7.0$ , 2H), 2.50 (brs, 4H), 1.76 – 1.64 (m, 2H), 1.55 – 1.41 (m, 2H), 1.38 – 1.29 (m, 4H), 0.90 (t,  $J = 6.3$ , 3H);  $^{13}\text{C}$  NMR (101 MHz,  $\text{CDCl}_3$ )  $\delta$  200.89,

143.81, 134.98, 131.87, 129.84, 128.06, 125.07, 66.87, 53.66, 53.49, 40.04, 32.27, 31.29, 28.60, 28.51, 22.51, 14.01; MS (ESI)  $m/z$  370.5 [M+H]<sup>+</sup>.

**4-(3-(2-Chloro-4-(hexylthio)phenyl)-3-oxopropyl)piperazin-2-one** **17{2,1,4}**. Yield 90%; <sup>1</sup>H NMR (400 MHz, CDCl<sub>3</sub>) δ 7.46 (d,  $J$  = 8.2, 1H), 7.25 (d,  $J$  = 1.6, 1H), 7.16 (dd,  $J$  = 1.7, 8.2, 1H), 6.97 (brs, 1H), 3.38 (brs, 2H), 3.22 – 3.09 (m, 4H), 2.96 (t,  $J$  = 7.4, 2H), 2.86 (t,  $J$  = 7.0, 2H), 2.77 – 2.64 (m, 2H), 1.75 – 1.61 (m, 2H), 1.52 – 1.40 (m, 2H), 1.40 – 1.23 (m, 4H), 0.89 (t,  $J$  = 6.5, 3H); <sup>13</sup>C NMR (101 MHz, CDCl<sub>3</sub>) δ 200.25, 169.44, 144.21, 134.58, 131.96, 129.91, 128.02, 125.05, 56.66, 52.28, 49.04, 41.18, 40.18, 32.20, 31.28, 28.57, 28.50, 22.50, 14.01; MS (ESI)  $m/z$  383.5 [M+H]<sup>+</sup>.

**3-(4-Acetylpiperazin-1-yl)-1-(2-chloro-4-(hexylthio)phenyl)propan-1-one** **17{2,1,5}**. Yield 85%; <sup>1</sup>H NMR (400 MHz, CDCl<sub>3</sub>) δ 7.45 (d,  $J$  = 8.2, 1H), 7.25 (d,  $J$  = 1.7, 1H), 7.16 (dd,  $J$  = 1.8, 8.2, 1H), 3.63 – 3.54 (m, 2H), 3.50 – 3.40 (m, 2H), 3.15 (t,  $J$  = 7.0, 2H), 2.96 (t,  $J$  = 7.4, 2H), 2.80 (t,  $J$  = 7.0, 2H), 2.49 – 2.37 (m, 4H), 2.07 (s, 3H), 1.74 – 1.60 (m, 2H), 1.50 – 1.39 (m, 2H), 1.37 – 1.23 (m, 4H), 0.89 (t,  $J$  = 6.8, 3H); <sup>13</sup>C NMR (101 MHz, CDCl<sub>3</sub>) δ 200.71, 168.89, 143.98, 134.83, 131.90, 129.83, 128.03, 125.02, 53.14, 53.12, 52.57, 46.19, 41.29, 40.15, 32.23, 31.28, 28.57, 28.50, 22.50, 21.31, 14.01; MS (ESI)  $m/z$  411.5 [M+H]<sup>+</sup>.

**1-(2-Chloro-4-(hexylthio)phenyl)-3-(4-(ethylsulfonyl)piperazin-1-yl)propan-1-one** **17{2,1,6}**. Yield 86%; <sup>1</sup>H NMR (400 MHz, CDCl<sub>3</sub>) δ 7.19 (d,  $J$  = 8.2, 1H), 6.99 (d,  $J$  = 1.8, 1H), 6.91 (dd,  $J$  = 1.8, 8.2, 1H), 3.10 – 2.96 (m, 4H), 2.88 (t,  $J$  = 7.0, 2H), 2.77 – 2.63 (m, 4H), 2.57 (t,  $J$  = 7.0, 2H), 2.36 – 2.22 (m, 4H), 1.50 – 1.37 (m, 2H), 1.28 – 1.15 (m, 2H), 1.15 – 0.99 (m, 7H), 0.64 (t,  $J$

= 5.8, 3H);  $^{13}\text{C}$  NMR (101 MHz,  $\text{CDCl}_3$ )  $\delta$  200.29, 143.78, 134.48, 131.67, 129.57, 127.77, 124.76, 52.69, 52.36, 45.43, 43.52, 39.81, 31.97, 31.03, 28.31, 28.24, 22.24, 13.75, 7.53; MS (ESI)  $m/z$  461.6  $[\text{M}+\text{H}]^+$ .

**1-(2,3-Dichloro-4-(hexylthio)phenyl)-3-(dimethylamino)propan-1-one 17{2,2,1}**. Yield 84%;  $^1\text{H}$  NMR (400 MHz,  $\text{CDCl}_3$ )  $\delta$  7.28 (d, 1H,  $J = 8.3$  Hz), 7.06 (t, 1H,  $J = 7.7$  Hz), 3.05 (t, 2H,  $J = 7.2$  Hz), 2.88 (t, 2H,  $J = 7.4$  Hz), 2.65 (t, 2H,  $J = 7.2$  Hz), 2.20 (s, 6H), 1.66 (m, 2H), 1.40 (m, 2H), 1.24 (m, 4H), 0.83 (t, 3H,  $J = 6.6$  Hz);  $^{13}\text{C}$  NMR (100 MHz,  $\text{CDCl}_3$ )  $\delta$  200.88, 143.31, 136.57, 130.73, 130.02, 126.68, 123.24, 54.18, 45.22, 40.99, 32.19, 31.26, 28.60, 28.05, 22.44, 13.95; MS (ESI)  $m/z$  363.3  $[\text{M}+\text{H}]^+$ .

**1-(2,3-Dichloro-4-(hexylthio)phenyl)-3-(2-methylaziridin-1-yl)propan-1-one 17{2,2,2}**. Yield 97%;  $^1\text{H}$  NMR (400 MHz,  $\text{CDCl}_3$ )  $\delta$  7.40 (d,  $J = 8.3$ , 1H), 7.13 (d,  $J = 8.3$ , 1H), 3.20 (t,  $J = 7.0$ , 2H), 3.01 – 2.89 (m, 2H), 2.64 (t,  $J = 7.0$ , 2H), 1.81 – 1.66 (m, 2H), 1.53 – 1.39 (m, 4H), 1.39 – 1.24 (m, 5H), 1.14 (d,  $J = 5.3$ , 3H), 0.91 (t,  $J = 6.9$ , 3H);  $^{13}\text{C}$  NMR (101 MHz,  $\text{CDCl}_3$ )  $\delta$  200.70, 143.53, 136.58, 130.87, 130.26, 126.81, 123.20, 55.85, 43.22, 34.93, 34.91, 32.24, 31.33, 28.66, 28.10, 22.50, 18.31, 14.01; MS (ESI)  $m/z$  374.4  $[\text{M}+\text{H}]^+$ .

**1-(2,3-Dichloro-4-(hexylthio)phenyl)-3-morpholinopropan-1-one 17{2,2,3}**. Yield 87%;  $^1\text{H}$  NMR (400 MHz,  $\text{CDCl}_3$ )  $\delta$  7.35 (d,  $J = 8.3$ , 1H), 7.13 (d,  $J = 8.3$ , 1H), 3.74 – 3.61 (m, 4H), 3.14 (t,  $J = 7.1$ , 2H), 2.96 (t,  $J = 7.4$ , 2H), 2.77 (t,  $J = 7.1$ , 2H), 2.46 (brs, 4H), 1.82 – 1.66 (m, 2H), 1.56 – 1.40 (m, 2H), 1.40 – 1.26 (m, 4H), 0.91 (t,  $J = 6.9$ , 3H);  $^{13}\text{C}$  NMR (101 MHz,  $\text{CDCl}_3$ )  $\delta$  201.07,

143.38, 136.66, 130.75, 130.06, 126.73, 123.23, 66.86, 53.64, 53.46, 40.21, 32.26, 31.33, 28.66, 28.10, 22.50, 14.02; MS (ESI)  $m/z$  404.4 [M+H]<sup>+</sup>.

**4-(3-(2,3-Dichloro-4-(hexylthio)phenyl)-3-oxopropyl)piperazin-2-one** **17**{2,2,4}Yield 83%; <sup>1</sup>H NMR (400 MHz, CDCl<sub>3</sub>) δ 7.26 (d,  $J$  = 8.3, 1H), 7.05 (d,  $J$  = 8.4, 1H), 6.84 (s, 1H), 3.31 – 3.19 (m, 2H), 3.11 – 3.01 (m, 4H), 2.94 – 2.84 (m, 2H), 2.77 (t,  $J$  = 7.0, 2H), 2.64 – 2.53 (m, 2H), 1.72 – 1.60 (m, 2H), 1.48 – 1.35 (m, 2H), 1.32 – 1.19 (m, 4H), 0.88 – 0.74 (m, 3H); <sup>13</sup>C NMR (101 MHz, CDCl<sub>3</sub>) δ 200.50, 169.41, 143.73, 136.31, 130.73, 130.07, 126.76, 123.25, 56.74, 52.26, 48.98, 41.24, 40.42, 32.23, 31.32, 28.66, 28.08, 22.50, 14.02; MS (ESI)  $m/z$  417.4 [M+H]<sup>+</sup>.

**3-(4-Acetylpiperazin-1-yl)-1-(2,3-dichloro-4-(hexylthio)phenyl)propan-1-one** **17**{2,2,5}. Yield 89%; <sup>1</sup>H NMR (400 MHz, CDCl<sub>3</sub>) δ 7.34 (d,  $J$  = 8.3, 1H), 7.12 (d,  $J$  = 8.3, 1H), 3.57 (brs, 2H), 3.50 – 3.38 (m, 2H), 3.13 (t,  $J$  = 6.9, 2H), 2.96 (t,  $J$  = 7.4, 2H), 2.79 (t,  $J$  = 6.9, 2H), 2.52 – 2.35 (m, 4H), 2.07 (s, 3H), 1.82 – 1.62 (m, 2H), 1.57 – 1.42 (m,  $J$  = 7.2, 2H), 1.38 – 1.24 (m, 4H), 0.90 (t,  $J$  = 6.9, 3H); <sup>13</sup>C NMR (101 MHz, CDCl<sub>3</sub>) δ 200.86, 168.89, 143.56, 136.50, 130.76, 130.09, 126.72, 123.19, 53.11, 52.56, 46.17, 41.28, 40.34, 32.24, 31.32, 28.66, 28.08, 22.50, 21.32, 14.02; MS (ESI)  $m/z$  445.46 [M+H]<sup>+</sup>.

**1-(2,3-Dichloro-4-(hexylthio)phenyl)-3-(4-(ethylsulfonyl)piperazin-1-yl)propan-1-one** **17**{2,2,6}. Yield 86%; <sup>1</sup>H NMR (400 MHz, CDCl<sub>3</sub>) δ 7.07 (d,  $J$  = 8.3, 1H), 6.86 (d,  $J$  = 8.3, 1H), 3.00 (brs, 4H), 2.85 (t,  $J$  = 6.9, 2H), 2.74 – 2.62 (m, 4H), 2.55 (t,  $J$  = 6.9, 2H), 2.36 – 2.18 (m, 4H), 1.58 – 1.40 (m, 2H), 1.29 – 1.16 (m, 2H), 1.16 – 1.01 (m, 7H), 0.73 – 0.55 (m,  $J$  = 6.8, 3H); <sup>13</sup>C

NMR (101 MHz, CDCl<sub>3</sub>)  $\delta$  200.45, 143.35, 136.15, 130.51, 129.86, 126.42, 122.92, 52.67, 52.34, 45.42, 43.53, 39.99, 31.97, 31.06, 28.40, 27.82, 22.24, 13.76, 7.53; MS (ESI)  $m/z$  495.5 [M+H]<sup>+</sup>.

**1-(2,5-Dichloro-4-(hexylthio)phenyl)-3-(dimethylamino)propan-1-one** **17**{2,3,1}. Yield 59%;

<sup>1</sup>H NMR (400 MHz, CDCl<sub>3</sub>)  $\delta$  7.50 (s, 1H), 7.08 (s, 1H), 3.06 (t,  $J$  = 7.2, 2H), 2.88 (t,  $J$  = 7.4, 3H), 2.65 (t,  $J$  = 7.2, 2H), 2.19 (s, 6H), 1.72 – 1.63 (m, 2H), 1.46 – 1.34 (m, 2H), 1.33 – 1.22 (m, 5H), 0.84 (t,  $J$  = 7.0, 4H); <sup>13</sup>C NMR (101 MHz, CDCl<sub>3</sub>)  $\delta$  199.50, 143.13, 135.01, 130.31, 130.20, 130.17, 126.97, 54.22, 45.34, 40.91, 32.01, 31.30, 28.62, 27.99, 22.50, 14.01; MS (ESI)  $m/z$  362.4 [M+H]<sup>+</sup>.

**1-(2,5-Dichloro-4-(hexylthio)phenyl)-3-(2-methylaziridin-1-yl)propan-1-one** **17**{2,3,2}. Yield

71%; <sup>1</sup>H NMR (400 MHz, CDCl<sub>3</sub>)  $\delta$  7.61 (s, 1H), 7.17 (s, 1H), 3.22 (t,  $J$  = 7.0, 2H), 2.97 (t,  $J$  = 7.4, 2H), 2.73 – 2.50 (m, 2H), 1.83 – 1.66 (m, 2H), 1.56 – 1.41 (m, 4H), 1.41 – 1.31 (m, 4H), 1.29 (d,  $J$  = 6.3, 1H), 1.15 (d,  $J$  = 5.4, 3H), 0.92 (t,  $J$  = 7.0, 3H); <sup>13</sup>C NMR (101 MHz, CDCl<sub>3</sub>)  $\delta$  199.24, 143.29, 134.91, 130.40, 130.27, 130.23, 127.04, 55.90, 43.00, 34.94, 31.99, 31.29, 28.62, 27.98, 22.49, 18.32, 14.01; MS (ESI)  $m/z$  374.4 [M+H]<sup>+</sup>.

**1-(2,5-Dichloro-4-(hexylthio)phenyl)-3-morpholinopropan-1-one** **17**{2,3,3}. Yield 92%; <sup>1</sup>H

NMR (400 MHz, CDCl<sub>3</sub>)  $\delta$  7.56 (s, 1H), 7.16 (s, 1H), 3.74 – 3.63 (m, 4H), 3.14 (t,  $J$  = 7.0, 2H), 2.96 (t,  $J$  = 7.4, 2H), 2.78 (q,  $J$  = 7.0, 2H), 2.47 (brs, 4H), 1.83 – 1.68 (m, 2H), 1.61 – 1.47 (m, 2H), 1.42 – 1.28 (m, 4H), 0.92 (t,  $J$  = 7.0, 3H); <sup>13</sup>C NMR (101 MHz, CDCl<sub>3</sub>)  $\delta$  199.60, 143.10, 135.02, 130.23, 130.13, 130.11, 126.92, 66.86, 53.60, 53.48, 40.01, 32.00, 31.29, 28.61, 27.97, 22.49, 14.01; MS (ESI)  $m/z$  404.4 [M+H]<sup>+</sup>.

**4-(3-(2,5-Dichloro-4-(hexylthio)phenyl)-3-oxopropyl)piperazin-2-one** **17**{2,3,4}. Yield 89%;

$^1\text{H}$  NMR (400 MHz,  $\text{CDCl}_3$ )  $\delta$  7.56 (s, 1H), 7.16 (s, 1H), 6.90 (brs, 1H), 3.42 (brs, 2H), 3.25 – 3.13 (m, 4H), 2.96 (t,  $J = 7.4$ , 2H), 2.87 (t,  $J = 6.9$ , 2H), 2.76 (brs, 2H), 1.81 – 1.66 (m, 2H), 1.57 – 1.43 (m, 2H), 1.43 – 1.26 (m, 4H), 0.91 (t,  $J = 7.0$ , 3H);  $^{13}\text{C}$  NMR (101 MHz,  $\text{CDCl}_3$ )  $\delta$  198.80, 169.27, 143.57, 134.58, 130.28, 130.28, 130.16, 126.94, 56.62, 52.22, 49.14, 41.17, 40.15, 31.98, 31.28, 28.61, 27.95, 22.49, 14.01; MS (ESI)  $m/z$  417.4  $[\text{M}+\text{H}]^+$ .

**3-(4-Acetylpiperazin-1-yl)-1-(2,5-dichloro-4-(hexylthio)phenyl)propan-1-one** **17**{2,3,5}. Yield

91%;  $^1\text{H}$  NMR (400 MHz,  $\text{CDCl}_3$ )  $\delta$  7.55 (d,  $J = 1.7$ , 1H), 7.15 (d,  $J = 1.3$ , 1H), 3.59 (brs, 2H), 3.50 (brs, 2H), 3.14 (t,  $J = 5.9$ , 2H), 2.96 (t,  $J = 7.4$ , 2H), 2.86 – 2.72 (m, 2H), 2.44 (d,  $J = 15.8$ , 4H), 2.11 (s, 3H), 1.82 – 1.68 (m, 2H), 1.59 – 1.43 (m, 2H), 1.43 – 1.26 (m, 4H), 0.97 – 0.83 (m, 3H);  $^{13}\text{C}$  NMR (101 MHz,  $\text{CDCl}_3$ )  $\delta$  199.39, 168.88, 143.27, 134.86, 130.20, 130.15, 130.11, 126.92, 53.16, 53.05, 52.57, 46.17, 41.27, 40.13, 31.99, 31.28, 28.61, 27.95, 22.48, 21.32, 14.01; MS (ESI)  $m/z$  445.5  $[\text{M}+\text{H}]^+$ .

**1-(2,5-Dichloro-4-(hexylthio)phenyl)-3-(4-(ethylsulfonyl)piperazin-1-yl)propan-1-one**

**17**{2,3,6}. Yield 93%;  $^1\text{H}$  NMR (400 MHz,  $\text{CDCl}_3$ )  $\delta$  7.54 (s, 1H), 7.15 (s, 1H), 3.28 (s, 4H), 3.13 (t,  $J = 6.8$ , 2H), 3.01 – 2.90 (m, 4H), 2.81 (t,  $J = 6.7$ , 2H), 2.59 (brs, 4H), 1.80 – 1.68 (m, 2H), 1.55 – 1.43 (m, 2H), 1.40 – 1.26 (m, 7H), 0.91 (t,  $J = 6.3$ , 3H);  $^{13}\text{C}$  NMR (101 MHz,  $\text{CDCl}_3$ )  $\delta$  199.35, 143.29, 134.86, 130.15, 130.12, 126.90, 52.93, 52.62, 45.69, 43.71, 40.05, 31.98, 31.28, 28.61, 27.95, 22.48, 14.01, 7.79; MS (ESI)  $m/z$  495.5  $[\text{M}+\text{H}]^+$ .

**1-(2,6-Dichloro-4-(hexylthio)phenyl)-3-(dimethylamino)propan-1-one 17{2,4,1}**. Yield 92%; <sup>1</sup>H NMR (400 MHz, CDCl<sub>3</sub>) δ 7.23 (s, 2H), 3.09 (t, 2H, *J* = 7.4 Hz), 3.00 (m, 2H), 2.84 (m, 2H), 2.35 (s, 6H), 1.72 (m, 2H), 1.50 (m, 2H), 1.37 (m, 4H), 0.96 (m, 3H); <sup>13</sup>C NMR (100 MHz, CDCl<sub>3</sub>) δ 200.83, 142.02, 135.99, 130.62, 126.20, 53.03, 45.29, 42.04, 32.66, 31.20, 28.48, 28.39, 22.44, 13.94; MS (ESI) *m/z* 363.3 [M+H]<sup>+</sup>.

**1-(2,6-Dichloro-4-(hexylthio)phenyl)-3-(2-methylaziridin-1-yl)propan-1-one 17{2,4,2}**. Yield 100%; <sup>1</sup>H NMR (400 MHz, CDCl<sub>3</sub>) δ 7.17 (s, 2H), 3.12 (t, *J* = 7.2, 2H), 2.94 (t, *J* = 7.3, 2H), 2.66 (t, *J* = 7.3, 2H), 1.73 – 1.61 (m, 2H), 1.52 – 1.37 (m, 4H), 1.37 – 1.26 (m, 5H), 1.17 (d, *J* = 5.1, 3H), 0.90 (t, *J* = 6.7, 3H); <sup>13</sup>C NMR (101 MHz, CDCl<sub>3</sub>) δ 200.71, 142.07, 136.01, 130.61, 126.21, 54.51, 44.26, 34.93, 34.86, 32.69, 31.25, 28.52, 28.44, 22.50, 18.31, 14.00; MS (ESI) *m/z* 374.4 [M+H]<sup>+</sup>.

**1-(2,6-Dichloro-4-(hexylthio)phenyl)-3-morpholinopropan-1-one 17{2,4,3}**. Yield 90%; <sup>1</sup>H NMR (400 MHz, CDCl<sub>3</sub>) δ 7.18 (s, 2H), 3.72 – 3.62 (m, 4H), 3.05 (t, *J* = 7.2, 2H), 2.94 (t, *J* = 7.4, 2H), 2.82 (t, *J* = 7.3, 2H), 2.55 (brs, 4H), 1.73 – 1.61 (m, 2H), 1.50 – 1.37 (m, 2H), 1.38 – 1.23 (m, 4H), 0.91 (t, *J* = 6.9, 3H); <sup>13</sup>C NMR (101 MHz, CDCl<sub>3</sub>) δ 200.83, 142.15, 135.94, 130.71, 126.19, 66.84, 53.56, 52.46, 41.18, 32.67, 31.25, 28.51, 28.44, 22.50, 14.00; MS (ESI) *m/z* 404.4 [M+H]<sup>+</sup>.

**4-(3-(2,6-Dichloro-4-(hexylthio)phenyl)-3-oxopropyl)piperazin-2-one 17{2,4,4}**. Yield 89%; <sup>1</sup>H NMR (400 MHz, CDCl<sub>3</sub>) δ 7.09 (s, 2H), 6.84 (brs, 1H), 3.33 – 3.22 (m, 2H), 3.10 (s, 2H), 2.97 (t, *J* = 7.0, 2H), 2.92 – 2.78 (m, 4H), 2.69 – 2.55 (m, 2H), 1.68 – 1.56 (m, 2H), 1.42 – 1.31 (m, 2H), 1.33 – 1.18 (m, 5H), 0.82 (t, *J* = 7.0, 3H); <sup>13</sup>C NMR (101 MHz, CDCl<sub>3</sub>) δ 200.35, 169.31, 142.41,

135.64, 130.67, 126.16, 56.66, 51.08, 49.14, 41.32, 41.16, 32.63, 31.25, 28.49, 28.44, 22.49; MS (ESI)  $m/z$  417.4  $[M+H]^+$ .

**3-(4-Acetylpiperazin-1-yl)-1-(2,6-dichloro-4-(hexylthio)phenyl)propan-1-one** **17{2,4,5}**. Yield 70%;  $^1\text{H}$  NMR (400 MHz,  $\text{CDCl}_3$ )  $\delta$  7.18 (s, 2H), 3.59 (brs, 2H), 3.50 – 3.37 (m, 2H), 3.04 (t,  $J = 7.0$ , 2H), 2.94 (t,  $J = 7.4$ , 2H), 2.90 – 2.78 (m, 2H), 2.47 (d,  $J = 19.8$ , 4H), 2.08 (s, 3H), 1.76 – 1.62 (m, 2H), 1.51 – 1.39 (m, 2H), 1.38 – 1.25 (m, 4H), 0.90 (t,  $J = 6.8$ , 3H);  $^{13}\text{C}$  NMR (101 MHz,  $\text{CDCl}_3$ )  $\delta$  200.71, 168.90, 142.27, 135.81, 130.69, 126.16, 53.23, 52.60, 51.91, 46.15, 41.33, 41.26, 32.64, 31.25, 28.49, 28.43, 22.49, 21.32, 14.00; MS (ESI)  $m/z$  445.5  $[M+H]^+$ .

**1-(2,6-Dichloro-4-(hexylthio)phenyl)-3-(4-(ethylsulfonyl)piperazin-1-yl)propan-1-one** **17{2,4,6}**. Yield 87%;  $^1\text{H}$  NMR (400 MHz,  $\text{CDCl}_3$ )  $\delta$  6.91 (s, 2H), 3.03 (s, 4H), 2.76 (t,  $J = 7.0$ , 2H), 2.68 (q,  $J = 7.4$ , 4H), 2.60 (t,  $J = 7.0$ , 2H), 2.31 (s, 4H), 1.49 – 1.35 (m, 2H), 1.25 – 1.15 (m, 2H), 1.15 – 1.00 (m, 8H), 0.64 (t,  $J = 5.4$ , 3H);  $^{13}\text{C}$  NMR (101 MHz,  $\text{CDCl}_3$ )  $\delta$  200.30, 142.06, 135.52, 130.43, 125.88, 52.41, 51.48, 45.39, 43.53, 40.96, 32.37, 30.99, 28.23, 28.17, 22.23, 13.74, 7.53; MS (ESI)  $m/z$  495.5  $[M+H]^+$ .

**3-(Dimethylamino)-1-(4-(hexylthio)-2,6-dimethylphenyl)propan-1-one** **17{2,5,1}**. Yield 93%;  $^1\text{H}$  NMR (400 MHz,  $\text{CDCl}_3$ )  $\delta$  6.90 (s, 2H), 2.84 (m, 4H), 2.66 (t, 2H,  $J = 7.3$  Hz), 2.22 (s, 6H), 2.16 (s, 6H), 1.59 (m, 2H), 1.36 (m, 2H), 1.31 (m, 4H), 0.84 (t, 3H,  $J = 6.9$  Hz);  $^{13}\text{C}$  NMR (100 MHz,  $\text{CDCl}_3$ )  $\delta$  208.86, 139.45, 137.74, 133.32, 127.34, 53.62, 45.35, 43.01, 32.97, 31.26, 28.93, 28.44, 22.46, 19.17, 13.94; MS (ESI)  $m/z$  322.5  $[M+H]^+$ .



**1-(4-(Hexylthio)-2,6-dimethylphenyl)-3-(2-methylaziridin-1-yl)propan-1-one** **17{2,5,2}**. Yield 82%; <sup>1</sup>H NMR (400 MHz, CDCl<sub>3</sub>) δ 6.87 (s, 2H), 2.89 (t, *J* = 7.0, 2H), 2.87 – 2.78 (m, 2H), 2.62 – 2.43 (m, 2H), 2.14 (s, 6H), 1.62 – 1.49 (m, 2H), 1.44 – 1.28 (m, 4H), 1.28 – 1.18 (m, 5H), 1.08 (d, *J* = 5.1, 3H), 0.82 (t, *J* = 6.9, 3H); <sup>13</sup>C NMR (101 MHz, CDCl<sub>3</sub>) δ 208.76, 139.53, 137.78, 133.33, 127.40, 54.91, 45.12, 34.98, 34.87, 33.06, 31.35, 29.01, 28.53, 22.54, 19.22, 18.34, 14.03; MS (ESI) *m/z* 334.5 [M+H]<sup>+</sup>.

**1-(4-(Hexylthio)-2,6-dimethylphenyl)-3-morpholinopropan-1-one** **17{2,5,3}**. Yield 84%; <sup>1</sup>H NMR (400 MHz, CDCl<sub>3</sub>) δ 6.95 (s, 2H), 3.78 – 3.64 (m, 4H), 2.98 – 2.86 (m, 4H), 2.78 (t, *J* = 6.9, 2H), 2.57 (brs, 4H), 2.29 (s, 6H), 1.74 – 1.58 (m, 2H), 1.49 – 1.38 (m, 2H), 1.38 – 1.24 (m, 4H), 0.90 (t, *J* = 6.9, 3H); <sup>13</sup>C NMR (101 MHz, CDCl<sub>3</sub>) δ 208.78, 139.38, 137.94, 133.46, 127.37, 66.83, 53.69, 53.08, 41.99, 32.99, 31.35, 28.99, 28.53, 22.54, 19.36, 14.04; MS (ESI) *m/z* 365.6 [M+H]<sup>+</sup>.

**4-(3-(4-(Hexylthio)-2,6-dimethylphenyl)-3-oxopropyl)piperazin-2-one** **17{2,5,4}**. Yield 85%; <sup>1</sup>H NMR (400 MHz, CDCl<sub>3</sub>) δ 6.87 (s, 2H), 6.54 (br, 1H), 3.33 (brs, 2H), 3.16 (brs, 2H), 2.87 – 2.73 (m, 6H), 2.69 (brs, 2H), 2.14 (s, 6H), 1.64 – 1.50 (m, 2H), 1.41 – 1.30 (m, 2H), 1.30 – 1.15 (m, 4H), 0.82 (t, *J* = 7.0, 3H); <sup>13</sup>C NMR (101 MHz, CDCl<sub>3</sub>) δ 208.23, 139.09, 138.19, 133.43, 132.07, 127.35, 56.73, 51.73, 49.30, 42.14, 41.13, 32.95, 31.34, 28.98, 28.53, 22.54, 19.32, 14.04; MS (ESI) *m/z* 377.6 [M+H]<sup>+</sup>.

**3-(4-Acetylpiperazin-1-yl)-1-(4-(hexylthio)-2,6-dimethylphenyl)propan-1-one** **17{2,5,5}** Yield 68%; <sup>1</sup>H NMR (400 MHz, CDCl<sub>3</sub>) δ 6.95 (s, 2H), 3.59 (brs, 2H), 3.50 (brs, 2H), 2.95 – 2.85 (m, 4H), 2.85 – 2.73 (m, 2H), 2.43 (t, *J* = 20.3, 4H), 2.22 (s, 6H), 2.12 (s, 3H), 1.73 – 1.57 (m, 2H), 1.50

– 1.38 (m, 2H), 1.38 – 1.24 (m, 4H), 0.90 (t,  $J = 6.9$ , 3H);  $^{13}\text{C}$  NMR (101 MHz,  $\text{CDCl}_3$ )  $\delta$  208.61, 168.91, 139.28, 138.04, 133.44, 127.34, 53.41, 52.72, 52.50, 46.15, 42.18, 41.24, 32.96, 31.34, 28.98, 28.52, 22.53, 21.32, 19.37, 14.03; MS (ESI)  $m/z$  405.6  $[\text{M}+\text{H}]^+$ .

**3-(4-(Ethylsulfonyl)piperazin-1-yl)-1-(4-(hexylthio)-2,6-dimethylphenyl)propan-1-one**

**17**{2,5,6}. Yield 52%;  $^1\text{H}$  NMR (400 MHz,  $\text{CDCl}_3$ )  $\delta$  6.87 (s, 2H), 3.12 (brs, 4H), 2.93 – 2.71 (m, 8H), 2.58 (brs, 4H), 2.14 (s, 6H), 1.62 – 1.51 (m, 2H), 1.37 (d,  $J = 7.9$ , 2H), 1.32 (t,  $J = 7.4$ , 3H), 1.26 – 1.19 (m, 4H), 0.82 (t,  $J = 7.0$ , 3H);  $^{13}\text{C}$  NMR (101 MHz,  $\text{CDCl}_3$ )  $\delta$  208.40, 138.14, 133.42, 132.04, 127.35, 52.86, 52.52, 52.33, 45.58, 43.97, 32.96, 31.35, 28.98, 28.53, 22.54, 19.39, 14.04, 7.81; MS (ESI)  $m/z$  455.7  $[\text{M}+\text{H}]^+$ .

**1-(2-Chloro-4-(hexylsulfonyl)phenyl)-3-(dimethylamino)propan-1-one** **17**{3,1,1}. Yield 91%;

$^1\text{H}$  NMR (400 MHz,  $\text{CDCl}_3$ )  $\delta$  7.89 (d, 1H,  $J = 8.0$  Hz), 7.77 (dd, 1H,  $J = 1.6, 8.0$  Hz), 7.55 (m, 1H), 3.04 (m, 4H), 2.64 (t, 1H,  $J = 7.0$  Hz), 2.18 (s, 4H), 2.04 (s, 1H), 1.64 (m, 2H), 1.31 (m, 2H), 1.20 (m, 4H), 0.80 (t, 3H,  $J = 6.8$  Hz);  $^{13}\text{C}$  NMR (100 MHz,  $\text{CDCl}_3$ )  $\delta$  201.62, 144.19, 141.93, 131.47, 129.76, 129.48, 126.50, 56.23, 53.84, 45.16, 41.29, 31.05, 27.84, 22.46, 22.22, 13.83; MS (ESI)  $m/z$  360.0  $[\text{M}+\text{H}]^+$ .

**1-(2-Chloro-4-(hexylsulfonyl)phenyl)-3-(2-methylaziridin-1-yl)propan-1-one** **17**{3,1,2}. Yield

40%;  $^1\text{H}$  NMR (400 MHz,  $\text{CDCl}_3$ )  $\delta$  7.98 (s, 1H), 7.86 (d,  $J = 8.0$ , 1H), 7.67 (d,  $J = 8.0$ , 1H), 3.21 (t,  $J = 6.8$ , 2H), 3.17 – 3.06 (m, 2H), 2.66 (t,  $J = 6.8$ , 2H), 1.80 – 1.65 (m, 2H), 1.51 – 1.45 (m, 1H), 1.45 – 1.35 (m, 2H), 1.35 – 1.22 (m, 4H), 1.15 (d,  $J = 5.3$ , 3H), 0.94 – 0.79 (m, 4H);  $^{13}\text{C}$  NMR (101

MHz, CDCl<sub>3</sub>) δ 201.45, 144.26, 142.08, 131.73, 129.95, 129.54, 126.58, 56.30, 55.44, 43.47, 34.99, 31.12, 27.92, 22.53, 22.29, 18.28, 13.91; MS (ESI) *m/z* 372.4 [M+H]<sup>+</sup>.

**1-(2-Chloro-4-(hexylsulfonyl)phenyl)-3-morpholinopropan-1-one** **17**{3,1,3}. Yield 23%; <sup>1</sup>H NMR (400 MHz, CDCl<sub>3</sub>) δ 7.84 (d, *J* = 1.5, 1H), 7.73 (dd, *J* = 1.7, 8.0, 1H), 7.50 (d, *J* = 8.0, 1H), 3.58 – 3.46 (m, 4H), 3.08 – 2.95 (m, 4H), 2.63 (t, *J* = 6.9, 2H), 2.36 – 2.24 (m, 4H), 1.66 – 1.48 (m, 3H), 1.31 – 1.21 (m, 2H), 1.21 – 1.06 (m, 4H), 0.75 (t, *J* = 6.9, 3H); <sup>13</sup>C NMR (101 MHz, CDCl<sub>3</sub>) δ 201.75, 144.21, 142.05, 131.59, 129.88, 129.53, 126.51, 66.86, 56.30, 53.41, 53.26, 40.49, 31.13, 27.92, 22.54, 22.29, 13.91; MS (ESI) *m/z* 402.5 [M+H]<sup>+</sup>.

**4-(3-(2-Chloro-4-(hexylsulfonyl)phenyl)-3-oxopropyl)piperazin-2-one** **17**{3,1,4}. Yield 34%; <sup>1</sup>H NMR (400 MHz, C CDCl<sub>3</sub>) δ 7.98 (d, *J* = 1.6, 1H), 7.87 (dd, *J* = 1.6, 8.0, 1H), 7.61 (d, *J* = 8.0, 1H), 6.42 (s, 1H), 3.38 – 3.30 (m, 2H), 3.23 – 3.08 (m, 6H), 2.87 (t, *J* = 6.8, 2H), 2.80 – 2.62 (m, 2H), 1.82 – 1.67 (m, 2H), 1.39 (dd, *J* = 7.1, 14.3, 2H), 1.35 – 1.19 (m, 4H), 0.88 (t, *J* = 6.9, 3H); <sup>13</sup>C NMR (101 MHz, CDCl<sub>3</sub>) δ 201.01, 168.94, 143.89, 142.30, 131.66, 129.99, 129.52, 126.65, 56.69, 56.29, 51.87, 49.08, 41.27, 40.67, 31.12, 27.92, 22.49, 22.29, 13.91; MS (ESI) *m/z* 415.5 [M+H]<sup>+</sup>.

**3-(4-Acetylpiperazin-1-yl)-1-(2-chloro-4-(hexylsulfonyl)phenyl)propan-1-one** **17**{3,1,5}. Yield 38%; <sup>1</sup>H NMR (400 MHz, CDCl<sub>3</sub>) δ 7.98 (d, *J* = 1.5, 1H), 7.86 (dd, *J* = 1.6, 8.0, 1H), 7.62 (d, *J* = 8.0, 1H), 3.64 – 3.52 (m, 2H), 3.47 – 3.39 (m, 2H), 3.20 – 3.06 (m, 4H), 2.79 (t, *J* = 6.9, 2H), 2.51 – 2.35 (m, 4H), 2.09 (s, 3H), 1.73 (dt, *J* = 7.7, 15.5, 3H), 1.46 – 1.34 (m, 2H), 1.34 (d, *J* = 3.3, 4H), 0.88 (t, *J* = 6.8, 3H); <sup>13</sup>C NMR (101 MHz, CDCl<sub>3</sub>) δ 201.47, 168.92, 144.06, 142.16, 131.65,

129.95, 129.48, 126.54, 56.28, 53.13, 52.69, 52.53, 46.18, 41.29, 40.65, 31.12, 27.91, 22.52, 22.28, 21.32, 13.91; MS (ESI)  $m/z$  443.5  $[M+H]^+$ .

**1-(2-Chloro-4-(hexylsulfonyl)phenyl)-3-(4-(ethylsulfonyl)piperazin-1-yl)propan-1-one**

**17{3,1,6}**. Yield 21%;  $^1\text{H}$  NMR (400 MHz,  $\text{CDCl}_3$ )  $\delta$  7.98 (d,  $J = 1.6$ , 1H), 7.87 (dd,  $J = 1.7$ , 8.0, 1H), 7.61 (d,  $J = 8.0$ , 1H), 3.35 – 3.23 (m, 4H), 3.20 – 3.06 (m, 4H), 2.96 (q,  $J = 7.4$ , 2H), 2.83 (t,  $J = 6.8$ , 2H), 2.63 – 2.50 (m, 4H), 1.81 – 1.68 (m, 2H), 1.46 – 1.35 (m, 5H), 1.35 – 1.20 (m, 4H), 0.89 (t,  $J = 6.9$ , 3H);  $^{13}\text{C}$  NMR (101 MHz,  $\text{CDCl}_3$ )  $\delta$  201.32, 144.00, 142.22, 131.69, 129.99, 129.44, 126.56, 56.28, 52.63, 52.54, 45.69, 43.91, 40.54, 31.13, 27.92, 22.52, 22.29, 13.91, 7.81; MS (ESI)  $m/z$  493.6  $[M+H]^+$ .

**1-(2,3-Dichloro-4-(hexylsulfonyl)phenyl)-3-(dimethylamino)propan-1-one** **17{3,2,1}**. Yield

88%;  $^1\text{H}$  NMR (400 MHz,  $\text{CDCl}_3$ )  $\delta$  8.12 (d, 1H,  $J = 8.1$  Hz), 7.47 (d, 1H,  $J = 8.1$  Hz), 3.42 (m, 2H), 3.09 (t, 2H,  $J = 6.9$ ), 2.71 (t, 2H,  $J = 7.0$  Hz), 2.25 (s, 6H), 1.69 (m, 2H), 1.41 (m), 1.27 (m, 4H), 0.86 (t, 3H,  $J = 6.9$  Hz);  $^{13}\text{C}$  NMR (100 MHz,  $\text{CDCl}_3$ )  $\delta$  201.29, 146.28, 139.57, 132.28, 131.23, 129.95, 125.89, 54.11, 53.84, 45.19, 41.38, 31.06, 27.87, 22.32, 22.22, 13.86; MS (ESI)  $m/z$  395.3  $[M+H]^+$ .

**1-(2,3-Dichloro-4-(hexylsulfonyl)phenyl)-3-(2-methylaziridin-1-yl)propan-1-one** **17{3,2,2}**.

Yield 66%;  $^1\text{H}$  NMR (400 MHz,  $\text{CDCl}_3$ )  $\delta$  8.12 (d,  $J = 8.1$ , 1H), 7.50 (d,  $J = 8.1$ , 1H), 3.47 – 3.37 (m, 2H), 3.15 (t,  $J = 6.8$ , 2H), 2.64 (t,  $J = 6.8$ , 2H), 1.76 – 1.59 (m, 2H), 1.45 – 1.34 (m, 2H), 1.34 – 1.21 (m, 5H), 1.14 (d,  $J = 5.3$ , 3H), 0.87 (t,  $J = 6.9$ , 3H);  $^{13}\text{C}$  NMR (101 MHz,  $\text{CDCl}_3$ )  $\delta$  201.01,

146.34, 139.73, 132.43, 131.41, 130.02, 125.91, 55.33, 54.14, 43.44, 34.98, 34.95, 31.09, 27.90, 22.37, 22.27, 18.29, 13.90; MS (ESI)  $m/z$  406.4  $[M+H]^+$ .

**1-(2,3-Dichloro-4-(hexylsulfonyl)phenyl)-3-morpholinopropan-1-one** **17{3,2,3}**. Yield 44%;

$^1\text{H}$  NMR (400 MHz,  $\text{CDCl}_3$ )  $\delta$  8.13 (d,  $J = 8.1$ , 1H), 7.49 (d,  $J = 8.1$ , 1H), 3.69 – 3.63 (m, 4H), 3.51 – 3.36 (m, 2H), 3.10 (t,  $J = 6.9$ , 2H), 2.74 (t,  $J = 6.9$ , 2H), 2.51 – 2.38 (m, 4H), 1.75 – 1.65 (m, 2H), 1.49 – 1.35 (m, 2H), 1.35 – 1.17 (m, 4H), 0.88 (t,  $J = 7.0$ , 3H);  $^{13}\text{C}$  NMR (101 MHz,  $\text{CDCl}_3$ )  $\delta$  201.25, 146.21, 139.71, 132.39, 131.35, 129.93, 125.94, 66.85, 54.14, 53.39, 53.20, 40.47, 31.10, 27.91, 22.38, 22.27, 13.91; MS (ESI)  $m/z$  436.4  $[M+H]^+$ .

**4-(3-(2,3-Dichloro-4-(hexylsulfonyl)phenyl)-3-oxopropyl)piperazin-2-one** **17{3,2,4}**. Yield

69%;  $^1\text{H}$  NMR (400 MHz,  $\text{CDCl}_3$ )  $\delta$  8.11 (d,  $J = 8.1$ , 1H), 7.45 (d,  $J = 8.1$ , 1H), 6.94 (s, 1H), 3.49 – 3.37 (m, 2H), 3.32 (brs, 2H), 3.20 – 3.05 (m, 4H), 2.93 (t,  $J = 6.6$ , 2H), 2.75 (brs, 2H), 1.77 – 1.63 (m, 2H), 1.46 – 1.35 (m, 2H), 1.35 (brs, 4H), 0.96 – 0.79 (m, 3H);  $^{13}\text{C}$  NMR (101 MHz,  $\text{CDCl}_3$ )  $\delta$  200.56, 169.13, 145.93, 139.92, 132.51, 131.38, 130.06, 125.86, 56.62, 54.14, 51.77, 49.03, 41.17, 40.64, 31.09, 27.90, 22.31, 22.27, 13.91; MS (ESI)  $m/z$  449.4  $[M+H]^+$ .

**3-(4-Acetylpiperazin-1-yl)-1-(2,3-dichloro-4-(hexylsulfonyl)phenyl)propan-1-one** **17{3,2,5}**.

Yield 86%;  $^1\text{H}$  NMR (400 MHz,  $\text{CDCl}_3$ )  $\delta$  8.11 (d,  $J = 8.1$ , 1H), 7.46 (d,  $J = 8.1$ , 1H), 3.56 (d,  $J = 4.6$ , 2H), 3.47 – 3.38 (m, 4H), 3.09 (t,  $J = 6.8$ , 2H), 2.76 (t,  $J = 6.8$ , 2H), 2.46 – 2.35 (m, 4H), 2.06 (s, 3H), 1.75 – 1.62 (m, 2H), 1.45 – 1.33 (m, 2H), 1.33 – 1.20 (m, 4H), 0.86 (t,  $J = 6.8$ , 3H);  $^{13}\text{C}$  NMR (101 MHz,  $\text{CDCl}_3$ )  $\delta$  200.98, 168.89, 146.06, 139.80, 132.46, 131.39, 129.94, 125.87, 54.12,

53.10, 52.61, 52.51, 46.16, 41.26, 40.62, 31.09, 27.88, 22.35, 22.25, 21.31, 13.90; MS (ESI)  $m/z$  477.5  $[M+H]^+$ .

**1-(2,3-Dichloro-4-(hexylsulfonyl)phenyl)-3-(4-(ethylsulfonyl)piperazin-1-yl)propan-1-one**

**17{3,2,6}**. Yield 38%;  $^1\text{H}$  NMR (400 MHz,  $\text{CDCl}_3$ )  $\delta$  8.13 (d,  $J = 8.1$ , 1H), 7.45 (d,  $J = 8.1$ , 1H), 3.48 – 3.38 (m, 2H), 3.32 – 3.21 (m, 4H), 3.10 (t,  $J = 6.7$ , 2H), 2.96 (q,  $J = 7.4$ , 2H), 2.81 (t,  $J = 6.7$ , 2H), 2.59 – 2.46 (m, 4H), 1.77 – 1.64 (m, 2H), 1.48 – 1.34 (m,  $J = 22.9$ , 5H), 1.34 – 1.23 (m, 4H), 0.88 (t,  $J = 6.8$ , 3H); MS (ESI)  $m/z$  527.5  $[M+H]^+$ .

**1-(2,3-Dichloro-4-(hexylsulfonyl)phenyl)-3-(dimethylamino)propan-1-one** **17{3,3,1}**. Yield

57%;  $^1\text{H}$  NMR (400 MHz,  $\text{CDCl}_3$ )  $\delta$  8.08 (s, 1H), 7.53 (s, 1H), 3.39 – 3.28 (m, 3H), 3.05 (t,  $J = 6.9$ , 2H), 2.68 (t,  $J = 6.9$ , 2H), 2.23 (s, 6H), 1.73 – 1.55 (m, 2H), 1.41 – 1.31 (m, 2H), 1.31 – 1.16 (m, 4H), 0.80 (t,  $J = 6.9$ , 5H);  $^{13}\text{C}$  NMR (101 MHz,  $\text{CDCl}_3$ )  $\delta$  200.29, 144.84, 139.05, 133.16, 131.92, 131.34, 129.63, 54.31, 53.85, 45.19, 41.31, 31.08, 27.90, 22.30, 22.27, 13.90; MS (ESI)  $m/z$  394.4  $[M+H]^+$ .

**1-(2,3-Dichloro-4-(hexylsulfonyl)phenyl)-3-(2-methylaziridin-1-yl)propan-1-one** **17{3,3,2}**.

Yield 74%;  $^1\text{H}$  NMR (400 MHz,  $\text{CDCl}_3$ )  $\delta$  8.17 (s, 1H), 7.67 (s, 1H), 3.48 – 3.35 (m, 2H), 3.19 (t,  $J = 6.8$ , 2H), 2.65 (t,  $J = 6.7$ , 2H), 1.76 – 1.66 (m, 2H), 1.48 – 1.35 (m, 3H), 1.35 – 1.24 (m, 6H), 1.15 (d,  $J = 5.4$ , 3H), 0.94 (t,  $J = 6.9$ , 3H);  $^{13}\text{C}$  NMR (101 MHz,  $\text{CDCl}_3$ )  $\delta$  200.11, 144.86, 139.16, 133.27, 131.97, 131.35, 129.83, 55.47, 54.31, 43.40, 35.00, 31.08, 27.91, 22.30, 22.27, 18.28, 13.90; MS (ESI)  $m/z$  406.4  $[M+H]^+$ .

**1-(2,5-Dichloro-4-(hexylsulfonyl)phenyl)-3-morpholinopropan-1-one 17{3,3,3}**. Yield 73%;

$^1\text{H}$  NMR (400 MHz,  $\text{CDCl}_3$ )  $\delta$  8.09 (s, 1H), 7.56 (s, 1H), 3.64 – 3.55 (m, 4H), 3.38 – 3.27 (m, 2H), 3.04 (t,  $J = 6.8$ , 2H), 2.66 (t,  $J = 6.8$ , 2H), 2.42 – 2.32 (m, 4H), 1.72 – 1.55 (m, 2H), 1.41 – 1.28 (m, 2H), 1.28 – 1.14 (m, 4H), 0.80 (t,  $J = 7.0$ , 3H);  $^{13}\text{C}$  NMR (101 MHz,  $\text{CDCl}_3$ )  $\delta$  200.45, 144.87, 139.08, 133.16, 131.96, 131.25, 129.60, 66.85, 54.32, 53.39, 53.26, 40.44, 31.08, 27.90, 22.30, 22.26, 13.90; MS (ESI)  $m/z$  436.4  $[\text{M}+\text{H}]^+$ .

**4-(3-(2,3-Dichloro-4-(hexylsulfonyl)phenyl)-3-oxopropyl)piperazin-2-one 17{3,3,4}**. Yield 77%;

$^1\text{H}$  NMR (400 MHz,  $\text{CDCl}_3$ )  $\delta$  8.10 (s, 1H), 7.52 (s, 1H), 6.55 (s, 1H), 3.38 – 3.30 (m, 2H), 3.30 – 3.22 (m, 2H), 3.12 – 3.03 (m, 4H), 2.78 (t,  $J = 6.8$ , 2H), 2.65 – 2.56 (m, 2H), 1.70 – 1.58 (m, 2H), 1.40 – 1.29 (m, 2H), 1.26 – 1.15 (m, 4H), 0.81 (t,  $J = 6.9$ , 3H);  $^{13}\text{C}$  NMR (101 MHz,  $\text{CDCl}_3$ )  $\delta$  199.55, 168.97, 144.45, 139.39, 133.32, 131.88, 131.46, 129.76, 56.59, 54.32, 51.82, 49.14, 41.21, 40.60, 31.08, 27.90, 22.27, 22.24, 13.91; MS (ESI)  $m/z$  449.4  $[\text{M}+\text{H}]^+$ .

**3-(4-Acetylpiperazin-1-yl)-1-(2,3-dichloro-4-(hexylsulfonyl)phenyl)propan-1-one 17{3,3,5}**.

Yield 60%;  $^1\text{H}$  NMR (400 MHz,  $\text{CDCl}_3$ )  $\delta$  8.16 (s, 1H), 7.61 (s, 1H), 3.65 – 3.52 (m, 2H), 3.46 – 3.33 (m, 4H), 3.12 (t,  $J = 6.8$ , 2H), 2.76 (t,  $J = 6.8$ , 2H), 2.47 – 2.33 (m, 4H), 2.08 (s, 3H), 1.78 – 1.62 (m, 2H), 1.47 – 1.36 (m, 2H), 1.34 – 1.20 (m, 4H), 0.87 (t,  $J = 7.0$ , 3H);  $^{13}\text{C}$  NMR (101 MHz,  $\text{CDCl}_3$ )  $\delta$  200.13, 168.90, 144.68, 139.19, 133.22, 131.89, 131.28, 129.67, 54.30, 53.10, 52.65, 52.51, 46.15, 41.26, 40.59, 31.07, 27.88, 22.27, 22.25, 21.32, 13.90; MS (ESI)  $m/z$  477.5  $[\text{M}+\text{H}]^+$ .

**1-(2,3-Dichloro-4-(hexylsulfonyl)phenyl)-3-(4-(ethylsulfonyl)piperazin-1-yl)propan-1-one**

**17{3,3,6}**. Yield 56%;  $^1\text{H}$  NMR (400 MHz,  $\text{CDCl}_3$ )  $\delta$  8.18 (s, 1H), 7.61 (s, 1H), 3.45 – 3.37 (m, 2H), 3.34 – 3.25 (m, 4H), 3.13 (t,  $J = 6.7$ , 2H), 2.96 (q,  $J = 7.4$ , 2H), 2.81 (t,  $J = 6.7$ , 2H), 2.59 – 2.46 (m, 4H), 1.78 – 1.68 (m, 2H), 1.48 – 1.35 (m, 5H), 1.35 – 1.21 (m, 4H), 0.89 (t,  $J = 7.0$ , 3H);  $^{13}\text{C}$  NMR (101 MHz,  $\text{CDCl}_3$ )  $\delta$  200.03, 144.66, 139.27, 133.28, 131.87, 131.29, 129.73, 54.33, 52.62, 52.56, 45.69, 43.86, 40.49, 31.08, 27.90, 22.27, 13.91, 7.80; MS (ESI)  $m/z$  527.5  $[\text{M}+\text{H}]^+$ .

**1-(2,6-Dichloro-4-(hexylsulfonyl)phenyl)-3-(dimethylamino)propan-1-one** **17{3,4,1}**. Yield 93%;  $^1\text{H}$  NMR (400 MHz,  $\text{CDCl}_3$ )  $\delta$  7.80 (s, 2H), 3.05 (m, 5H), 2.76 (t, 2H,  $J = 7.3$  Hz), 2.24 (s, 6H), 1.68 (m, 2H), 1.34 (m, 2H), 1.24 (m, 4H), 0.84 (t, 4H,  $J = 6.8$  Hz);  $^{13}\text{C}$  NMR (100 MHz,  $\text{CDCl}_3$ )  $\delta$  199.62, 143.94, 141.84, 131.90, 127.68, 56.31, 52.71, 45.24, 41.51, 31.05, 27.85, 22.42, 22.24, 13.84; MS (ESI)  $m/z$  395.3  $[\text{M}+\text{H}]^+$ .

**1-(2,6-Dichloro-4-(hexylsulfonyl)phenyl)-3-(4-(ethylsulfonyl)piperazin-1-yl)propan-1-one** **17{3,4,2}**. Yield 59%;  $^1\text{H}$  NMR (400 MHz,  $\text{CDCl}_3$ )  $\delta$  7.86 (s, 2H), 3.17 – 3.08 (m, 4H), 2.78 – 2.62 (m, 2H), 1.81 – 1.66 (m, 2H), 1.57 – 1.46 (m, 1H), 1.40 (s, 2H), 1.35 (dd,  $J = 4.9, 13.7$ , 6H), 1.17 (d,  $J = 5.1$ , 3H), 0.89 (t,  $J = 6.8$ , 3H);  $^{13}\text{C}$  NMR (101 MHz,  $\text{CDCl}_3$ )  $\delta$  199.49, 144.01, 141.92, 131.90, 127.72, 56.35, 54.16, 43.81, 35.05, 34.92, 31.10, 27.90, 22.46, 22.30, 18.30, 13.90; MS (ESI)  $m/z$  406.4  $[\text{M}+\text{H}]^+$ .

**3-(4-Acetylpiperazin-1-yl)-1-(2,6-dichloro-4-(hexylsulfonyl)phenyl)propan-1-one** **17{3,4,3}**. Yield 39%;  $^1\text{H}$  NMR (400 MHz,  $\text{CDCl}_3$ )  $\delta$  7.87 (s, 2H), 3.71 – 3.64 (m, 4H), 3.16 – 3.00 (m, 4H), 2.85 (t,  $J = 7.2$ , 2H), 2.53 – 2.42 (m, 4H), 1.80 – 1.64 (m, 2H), 1.48 – 1.36 (m, 2H), 1.36 – 1.17 (m,  $J = 3.3$ , 4H), 0.98 (t,  $J = 7.0$ , 3H);  $^{13}\text{C}$  NMR (101 MHz,  $\text{CDCl}_3$ )  $\delta$  199.70, 144.01, 141.92, 131.97,



127.73, 66.85, 56.36, 53.58, 52.14, 40.79, 31.11, 27.90, 22.49, 22.30, 13.91; MS (ESI)  $m/z$  436.4 [M+H]<sup>+</sup>.

**4-(3-(2,6-Dichloro-4-(hexylsulfonyl)phenyl)-3-oxopropyl)piperazin-2-one 17{3,4,4}**. Yield 94%;

<sup>1</sup>H NMR (400 MHz, CDCl<sub>3</sub>) δ 7.86 (s, 2H), 7.05 – 6.66 (m, 1H), 3.34 (brs, 2H), 3.17 (brs, 2H), 3.14 – 3.08 (m, 2H), 3.08 (t,  $J = 6.8$ , 2H), 2.93 (t,  $J = 7.0$ , 2H), 2.74 – 2.64 (m, 2H), 1.73 (s, 2H), 1.39 (s, 2H), 1.28 (s, 4H), 0.88 (s, 3H); <sup>13</sup>C NMR (101 MHz, CDCl<sub>3</sub>) δ 199.15, 169.25, 143.74, 142.07, 131.91, 127.77, 56.69, 56.30, 50.72, 49.21, 43.93, 41.17, 40.95, 31.09, 27.88, 22.43, 22.29, 13.90; MS (ESI)  $m/z$  449.4 [M+H]<sup>+</sup>.

**1-(2,6-Dichloro-4-(hexylsulfonyl)phenyl)-3-morpholinopropan-1-one 17{3,4,5}**. Yield 63%; <sup>1</sup>H

NMR (400 MHz, CDCl<sub>3</sub>) δ 7.86 (s, 2H), 3.62 – 3.56 (m, 2H), 3.46 – 3.42 (m, 2H), 3.15 – 3.09 (m, 2H), 3.06 (t,  $J = 7.0$ , 2H), 2.86 (t,  $J = 7.0$ , 2H), 2.53 – 2.40 (m,  $J = 17.1$ , 4H), 2.08 (s, 3H), 1.78 – 1.64 (m,  $J = 7.6$ , 2H), 1.47 – 1.36 (m, 2H), 1.36 (d,  $J = 3.5$ , 4H), 0.95 (d,  $J = 7.1$ , 3H); <sup>13</sup>C NMR (101 MHz, CDCl<sub>3</sub>) δ 199.52, 168.91, 143.91, 141.99, 131.93, 127.74, 56.32, 53.31, 52.62, 51.56, 46.17, 41.27, 40.97, 31.10, 27.89, 22.47, 22.29, 21.32, 13.90; MS (ESI)  $m/z$  477.5 [M+H]<sup>+</sup>.

**1-(2,6-Dichloro-4-(hexylsulfonyl)phenyl)-3-(2-methylaziridin-1-yl)propan-1-one 17{3,4,6}**.

Yield 31%; <sup>1</sup>H NMR (400 MHz, CDCl<sub>3</sub>) δ 7.87 (s, 2H), 3.28 (brs, 4H), 3.16 – 3.09 (m, 2H), 3.09 – 3.02 (m, 2H), 3.00 – 2.94 (m, 2H), 2.94 – 2.86 (m, 2H), 2.63 (brs, 4H), 1.79 – 1.69 (m, 2H), 1.47 – 1.35 (m, 5H), 1.35 – 1.23 (m, 4H), 0.90 (s, 3H); <sup>13</sup>C NMR (101 MHz, CDCl<sub>3</sub>) δ 199.43, 143.95, 142.03, 131.95, 127.75, 56.34, 52.73, 51.43, 45.68, 43.82, 40.84, 31.10, 27.90, 22.47, 22.30, 13.91, 7.79; MS (ESI)  $m/z$  527.5 [M+H]<sup>+</sup>.

**3-(Dimethylamino)-1-(4-(hexylsulfonyl)-2,6-dimethylphenyl)propan-1-one 17{3,5,1}**. Yield 90%;  $^1\text{H}$  NMR (400 MHz,  $\text{CDCl}_3$ )  $\delta$  7.54 (s, 2H), 3.05 (m, 2H), 2.87 (t, 2H,  $J = 7.2$  Hz), 2.71 (t, 2H,  $J = 7.1$  Hz), 2.29 (s, 6H), 2.24 (m, 6H), 1.68 (m, 2H), 1.34 (m, 2H), 1.24 (m, 4H), 0.84 (t, 3H,  $J = 6.9$  Hz);  $^{13}\text{C}$  NMR (100 MHz,  $\text{CDCl}_3$ )  $\delta$  207.76, 146.72, 139.05, 134.43, 127.18, 56.19, 53.28, 45.33, 42.58, 31.07, 27.87, 22.47, 22.23, 19.09, 13.83; MS (ESI)  $m/z$  354.4  $[\text{M}+\text{H}]^+$ .

**1-(4-(Hexylsulfonyl)-2,6-dimethylphenyl)-3-(2-methylaziridin-1-yl)propan-1-one 17{3,5,2}**. Yield 100%;  $^1\text{H}$  NMR (400 MHz,  $\text{CDCl}_3$ )  $\delta$  7.49 (s, 2H), 3.05 – 2.96 (m, 2H), 2.91 (t,  $J = 7.0$ , 2H), 2.69 – 2.49 (m, 2H), 2.26 (s, 6H), 1.69 – 1.56 (m, 2H), 1.42 (dd,  $J = 3.9, 9.3$ , 2H), 1.30 (dt,  $J = 7.0, 14.1$ , 2H), 1.26 – 1.14 (m, 5H), 1.08 (d,  $J = 5.1$ , 3H), 0.80 (t,  $J = 6.8$ , 3H);  $^{13}\text{C}$  NMR (101 MHz,  $\text{CDCl}_3$ )  $\delta$  207.59, 146.83, 139.14, 134.43, 127.25, 56.28, 54.50, 44.68, 35.11, 34.92, 31.16, 27.96, 22.55, 22.32, 19.15, 18.30, 13.92; MS (ESI)  $m/z$  366.2  $[\text{M}+\text{H}]^+$ .

**1-(4-(Hexylsulfonyl)-2,6-dimethylphenyl)-3-morpholinopropan-1-one 17{3,5,3}**. Yield 58%;  $^1\text{H}$  NMR (400 MHz,  $\text{CDCl}_3$ )  $\delta$  7.51 (s, 2H), 3.66 – 3.55 (m, 4H), 3.03 – 2.94 (m, 2H), 2.82 (t,  $J = 7.0$ , 2H), 2.71 (t,  $J = 6.8$ , 2H), 2.49 – 2.34 (m, 4H), 2.27 (s, 6H), 1.71 – 1.50 (m, 3H), 1.35 – 1.25 (m, 2H), 1.25 – 1.09 (m, 4H), 0.80 (t,  $J = 6.7$ , 3H);  $^{13}\text{C}$  NMR (101 MHz,  $\text{CDCl}_3$ )  $\delta$  207.73, 146.74, 139.20, 134.52, 127.29, 66.87, 56.28, 53.74, 52.65, 41.72, 31.17, 27.97, 22.56, 22.32, 19.26, 13.93; MS (ESI)  $m/z$  396.2  $[\text{M}+\text{H}]^+$ .

**4-(3-(4-(Hexylsulfonyl)-2,6-dimethylphenyl)-3-oxopropyl)piperazin-2-one 17{3,5,4}**. Yield 56%;  $^1\text{H}$  NMR (400 MHz,  $\text{CDCl}_3$ )  $\delta$  7.50 (s, 2H), 6.52 (s, 1H), 3.27 (s, 2H), 3.09 (s, 2H), 3.06 – 2.93 (m, 2H), 2.82 (s, 4H), 2.64 (t,  $J = 5.4$ , 2H), 2.22 (d,  $J = 21.0$ , 6H), 1.69 – 1.56 (m, 2H), 1.34 –

S82

1.25 (m, 2H), 1.25 – 1.10 (m, 4H), 0.80 (t,  $J = 6.8$ , 3H);  $^{13}\text{C}$  NMR (101 MHz,  $\text{CDCl}_3$ )  $\delta$  207.14, 169.07, 146.53, 139.33, 134.48, 127.34, 56.86, 56.27, 51.28, 49.42, 41.91, 41.23, 31.16, 27.96, 22.53, 22.32, 19.19, 13.93; MS (ESI)  $m/z$  409.2  $[\text{M}+\text{H}]^+$ .

**3-(4-Acetylpiperazin-1-yl)-1-(4-(hexylsulfonyl)-2,6-dimethylphenyl)propan-1-one** 17{3,5,5}.

Yield 100%;  $^1\text{H}$  NMR (400 MHz,  $\text{CDCl}_3$ )  $\delta$  7.58 (s,  $J = 9.1$ , 2H), 3.64 (brs, 2H), 3.51 – 3.39 (m, 2H), 3.13 – 3.01 (m, 2H), 2.90 (t,  $J = 6.6$ , 2H), 2.81 (t,  $J = 6.5$ , 2H), 2.55 – 2.40 (m, 4H), 2.33 (s, 6H), 2.06 (s, 3H), 1.78 – 1.64 (m, 2H), 1.42 – 1.32 (m, 2H), 1.32 – 1.17 (m, 4H), 0.87 (t,  $J = 6.8$ , 3H);  $^{13}\text{C}$  NMR (101 MHz,  $\text{CDCl}_3$ )  $\delta$  207.52, 168.93, 146.66, 139.26, 134.47, 127.30, 56.26, 53.49, 52.76, 52.03, 46.16, 41.91, 41.26, 31.16, 27.96, 22.55, 22.31, 21.32, 19.25, 13.92; MS (ESI)  $m/z$  437.22  $[\text{M}+\text{H}]^+$ .

**3-(4-(Ethylsulfonyl)piperazin-1-yl)-1-(4-(hexylsulfonyl)-2,6-dimethylphenyl)propan-1-one**

7{3,5,6}.

Yield 54%;  $^1\text{H}$  NMR (400 MHz,  $\text{CDCl}_3$ )  $\delta$  7.50 (s, 2H), 3.22 (brs, 4H), 3.03 – 2.95 (m, 2H), 2.94 – 2.84 (m, 2H), 2.84 – 2.71 (m, 4H), 2.49 (s, 4H), 2.26 (s, 6H), 1.71 – 1.56 (m, 3H), 1.30 (t,  $J = 7.4$ , 5H), 1.26 – 1.10 (m, 4H), 0.80 (t,  $J = 6.8$ , 3H);  $^{13}\text{C}$  NMR (101 MHz,  $\text{CDCl}_3$ )  $\delta$  207.53, 146.63, 139.31, 134.45, 127.32, 56.27, 52.94, 51.87, 45.69, 43.97, 41.84, 31.17, 27.97, 22.55, 22.32, 19.26, 13.93, 7.81; MS (ESI)  $m/z$  487.2  $[\text{M}+\text{H}]^+$ .

Spectral and Chromatographic Data

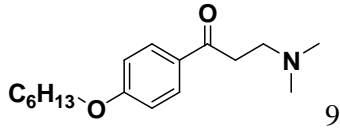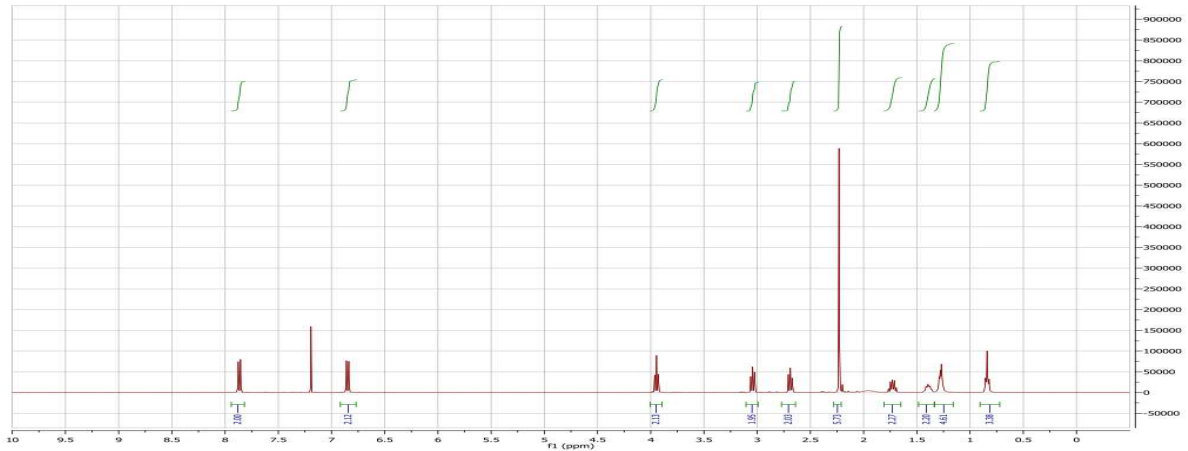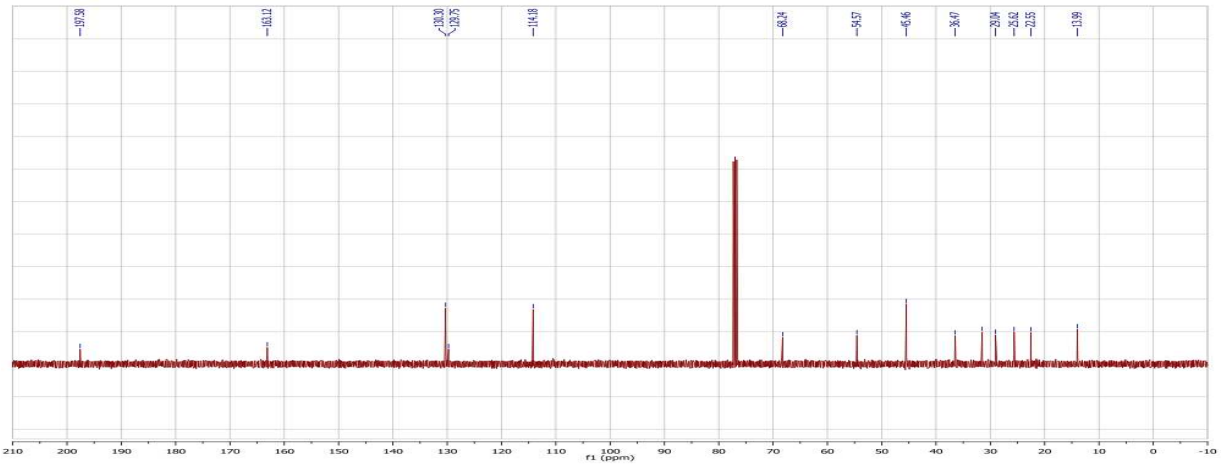

(1) ELSD Signal

34.564  
Range: 34.551

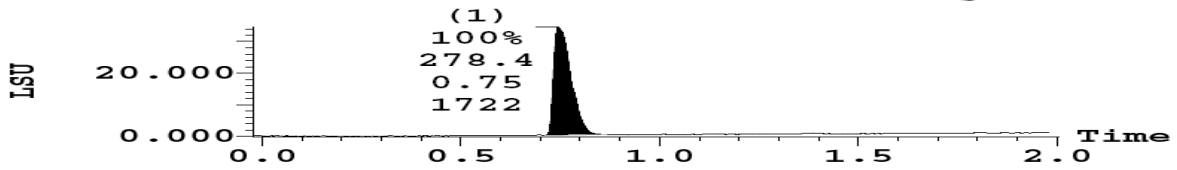

| Peak ID | Compound Found | Time | Mass Found |
|---------|----------------|------|------------|
| 1       | Found          | 0.73 | 278.40     |

1: MS ES+  
5.9e+007

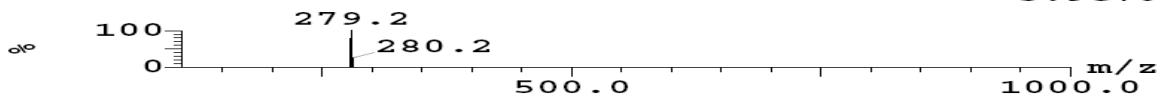

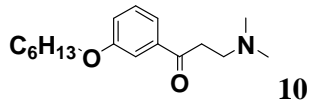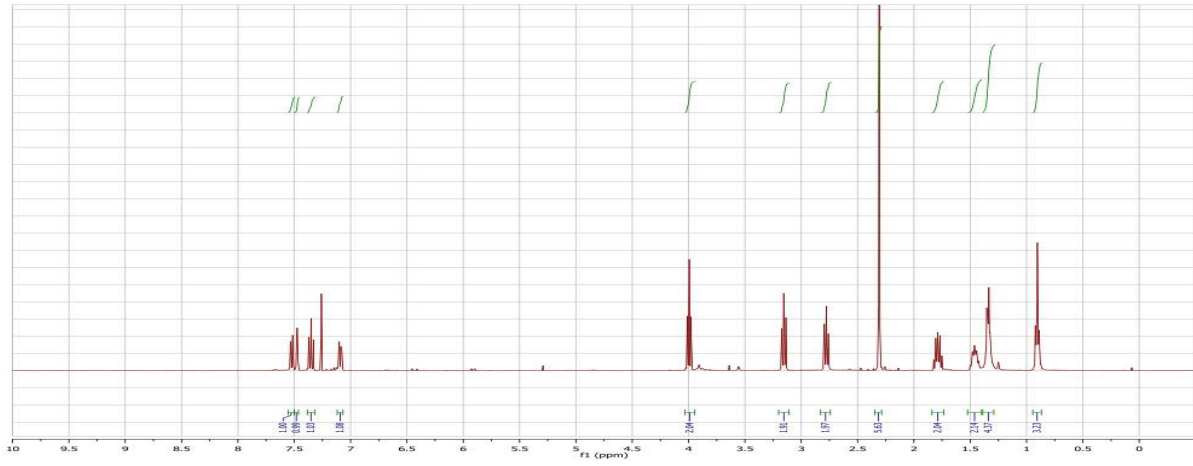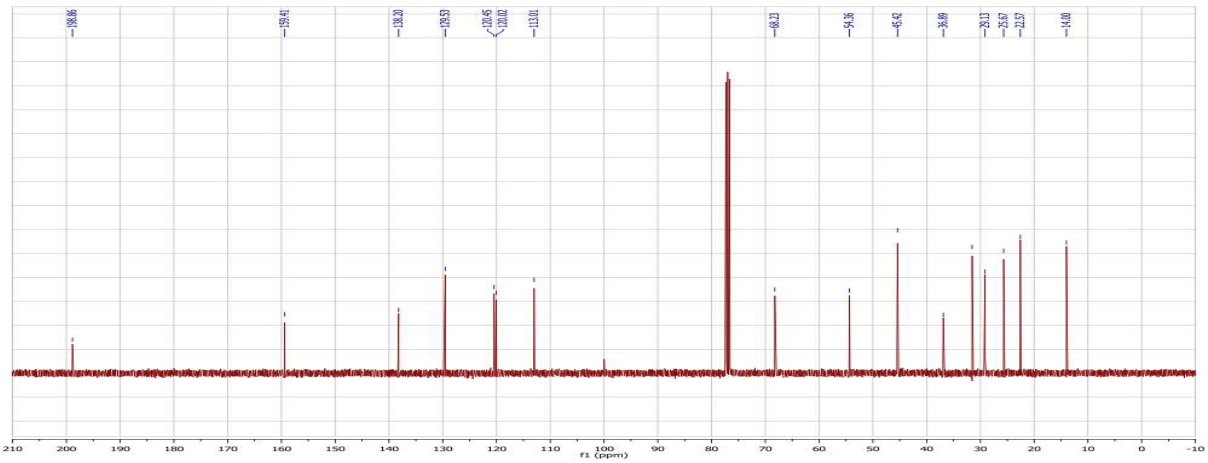

(1) ELSD Signal

51.194  
Range: 51.184

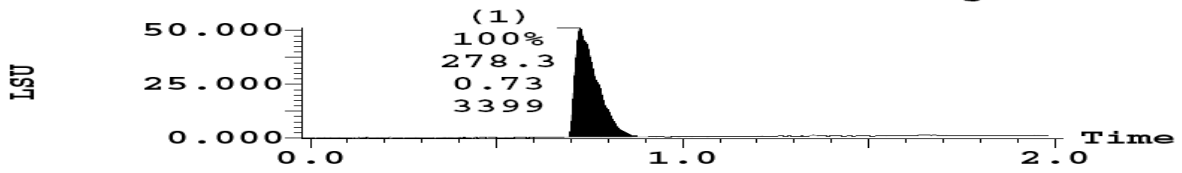

| Peak ID | Compound | Time | Mass Found |
|---------|----------|------|------------|
| 1       | Found    | 0.73 | 278.30     |

1: MS ES+  
1.1e+008

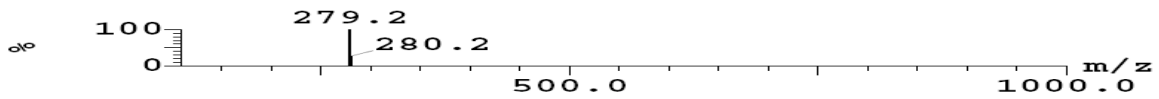

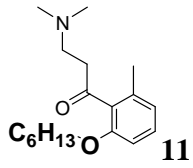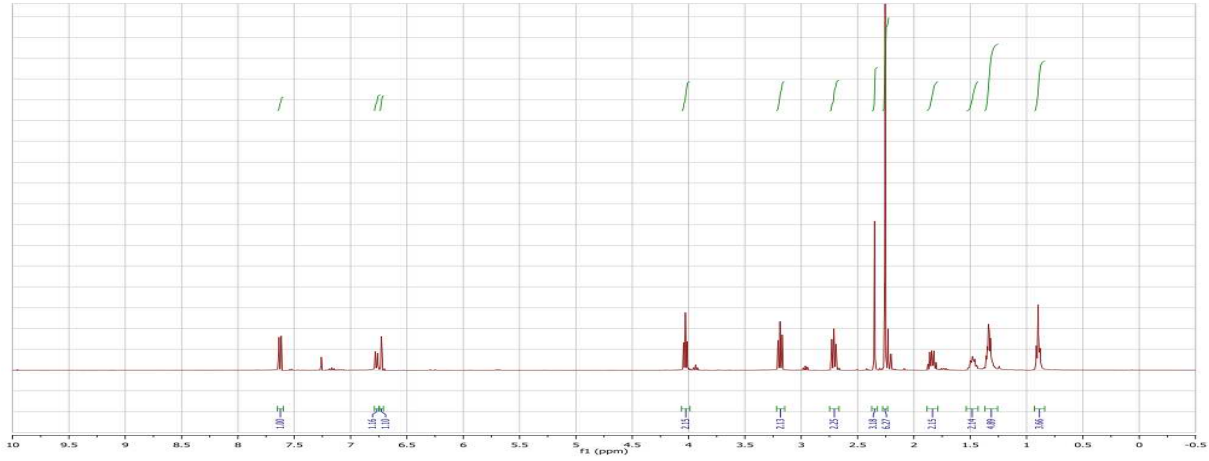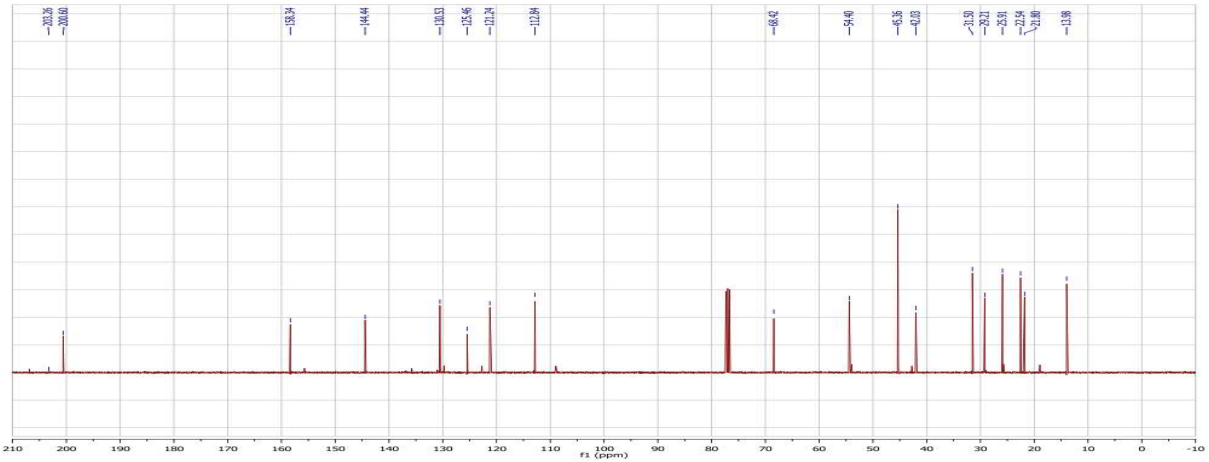

(1) ELSD Signal

30.172  
Range: 30.121

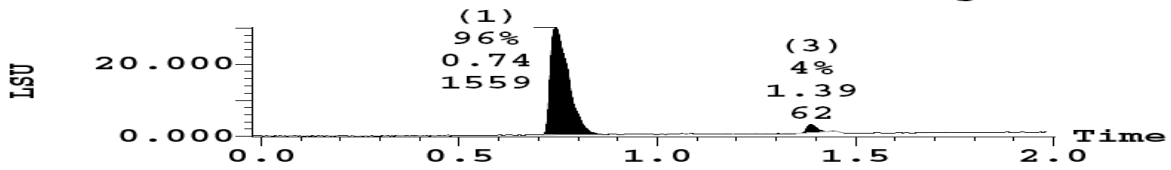

| Peak ID | Compound Found | Time | Mass Found |
|---------|----------------|------|------------|
| 2       |                | 0.80 | 292.22     |

2: (Time: 0.80)

1: MS ES+  
1.3e+008

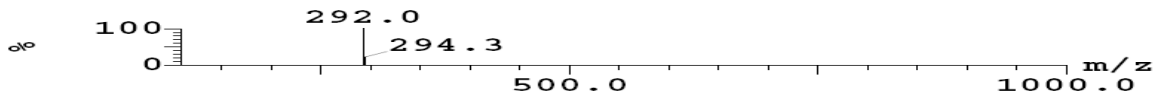

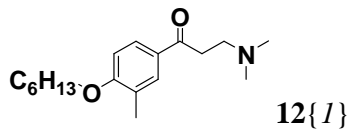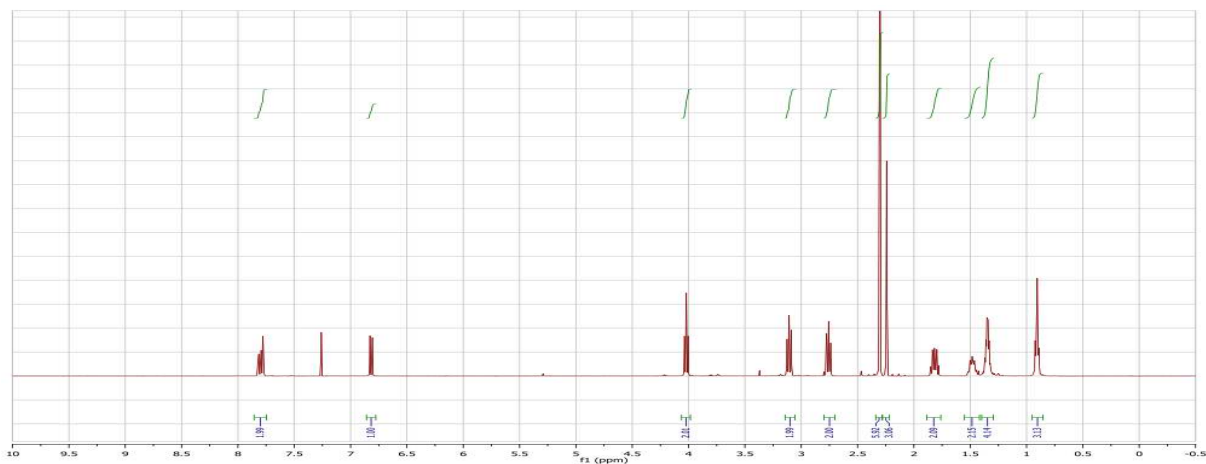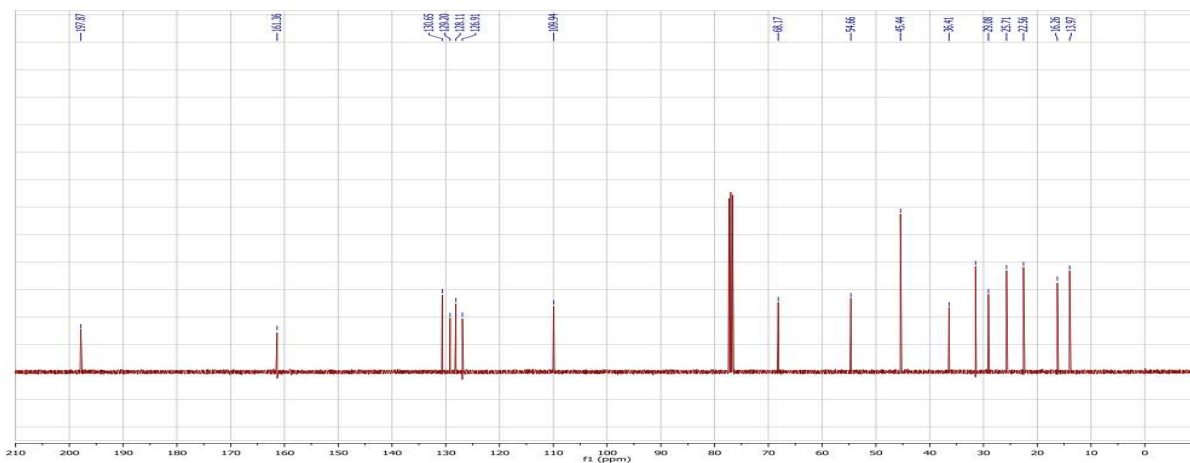

(1) ELSD Signal 36.992  
Range: 36.953

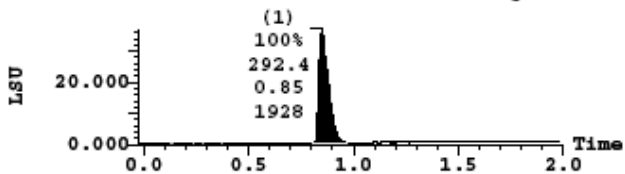

| Peak ID | Compound | Time | Mass Found |
|---------|----------|------|------------|
| 2       | Found    | 0.91 | 292.43     |

2: (Time: 0.91) 1:MS ES+  
7.0e+007

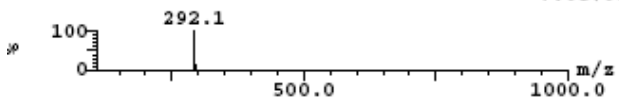

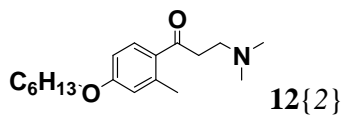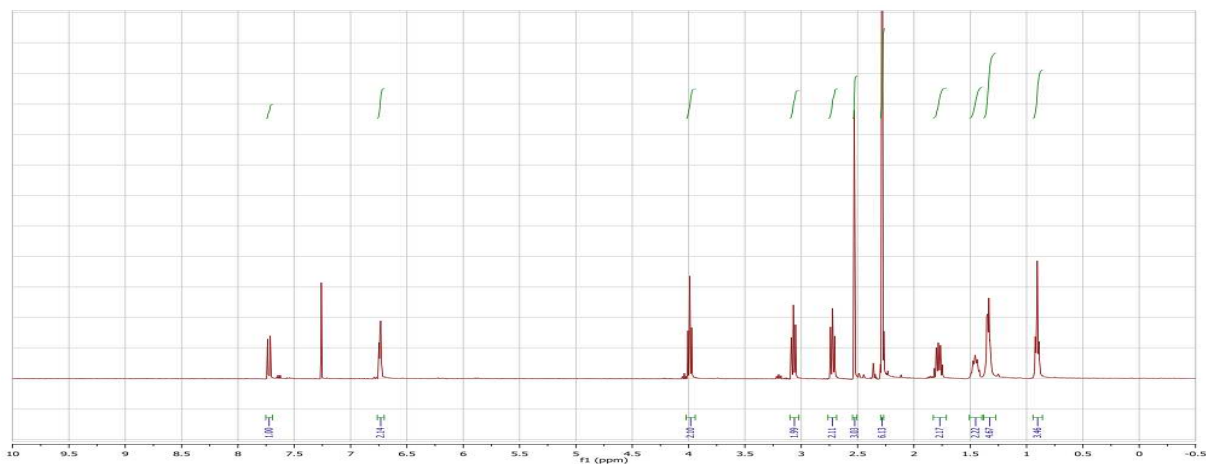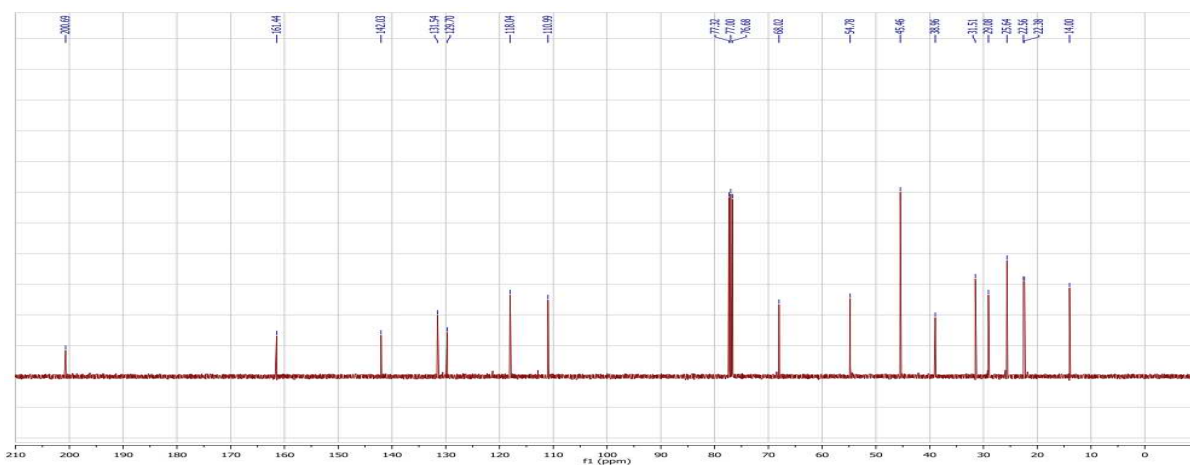

(1) ELSD Signal

83.425  
Range: 83.385

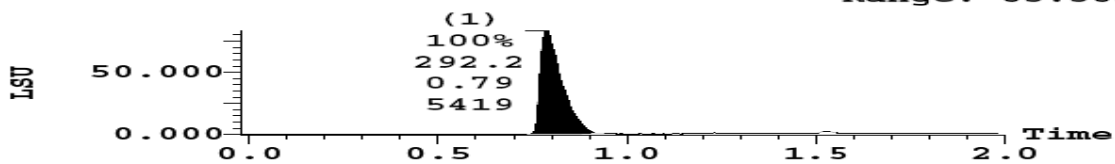

| Peak ID | Compound | Time | Mass Found |
|---------|----------|------|------------|
| 1       | Found    | 0.77 | 292.22     |

1: (Time: 0.77)

1: MS ES+  
8.7e+007

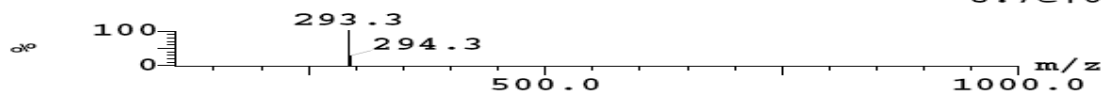



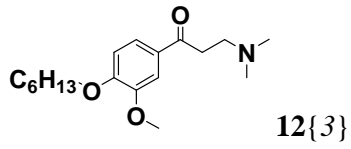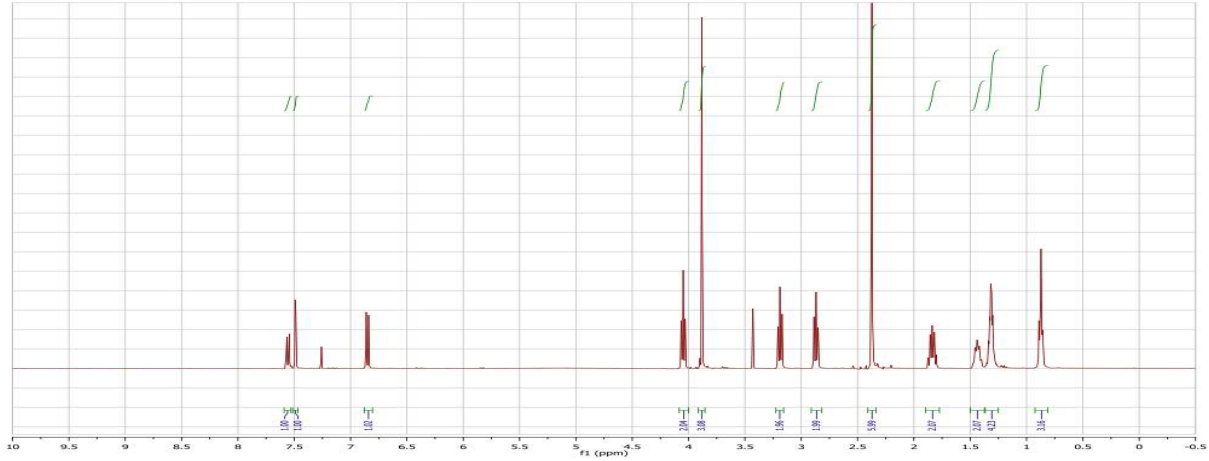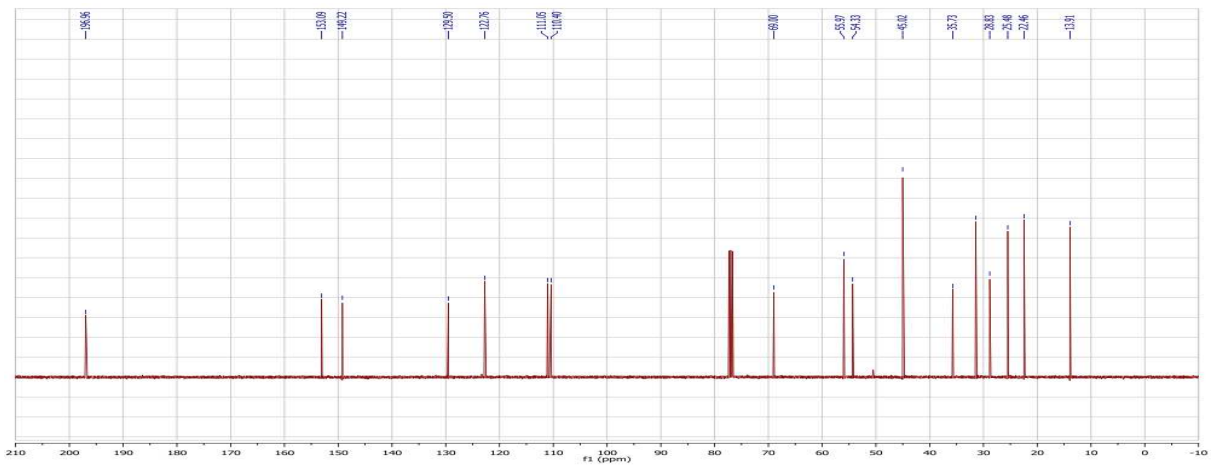

(1) ELSD Signal

60.061  
Range: 60.058

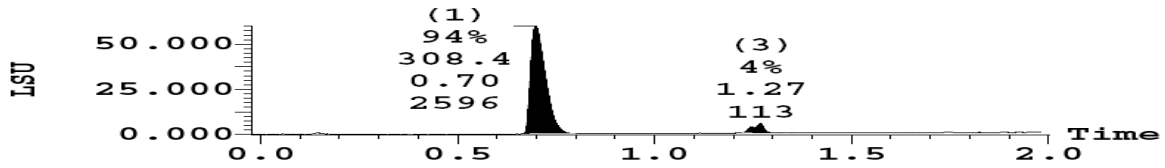

| Peak ID | Compound Found | Time | Mass Found |
|---------|----------------|------|------------|
| 1       | Found          | 0.69 | 308.43     |

1:MS ES+  
8.7e+007

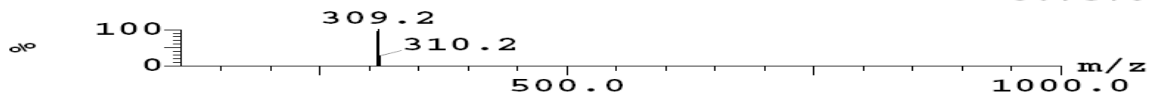

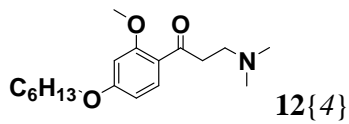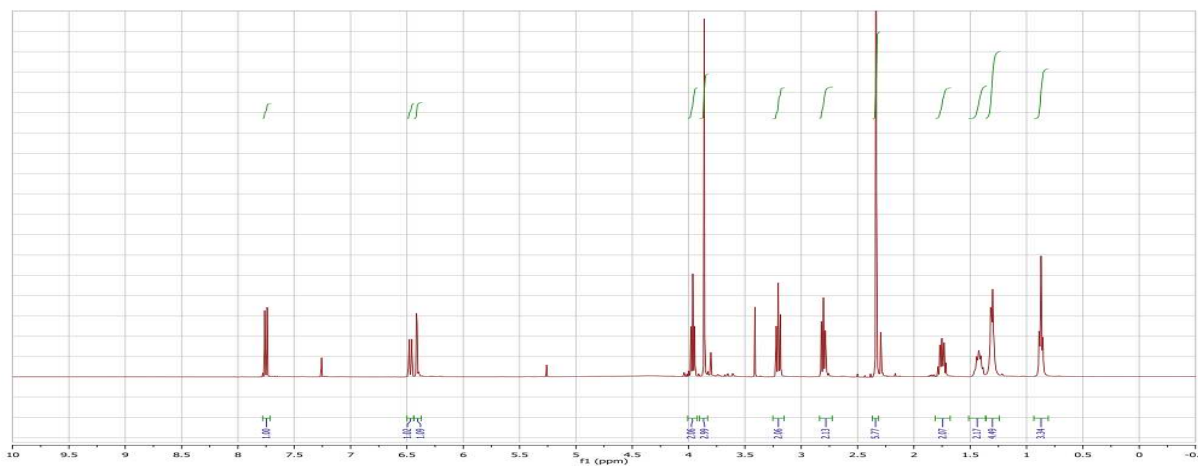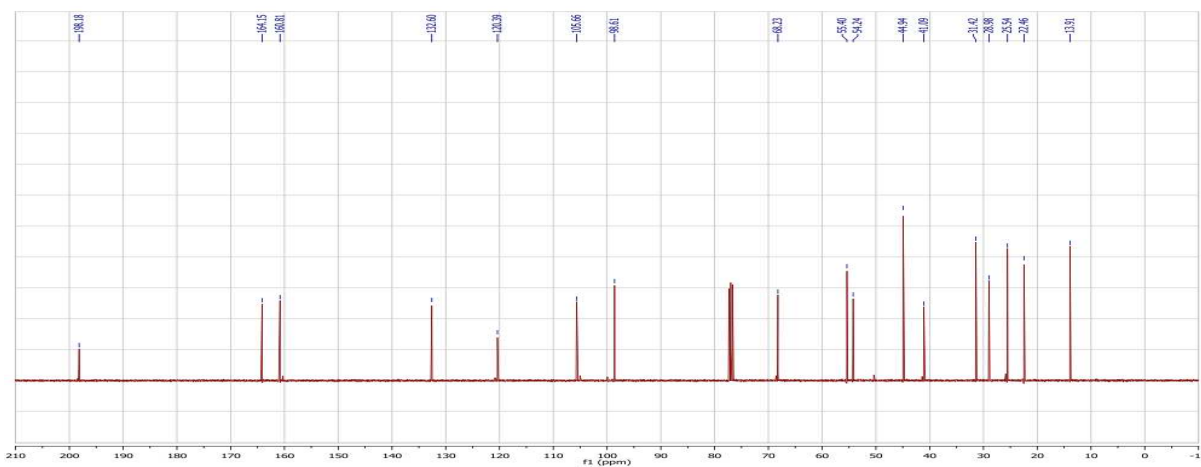

(1) ELSD Signal

60.014  
Range: 60.007

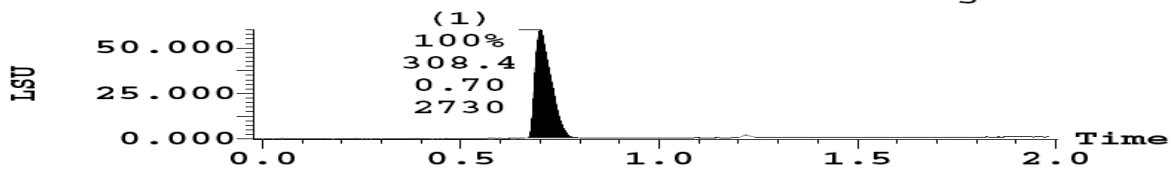

| Peak ID | Compound Found | Time | Mass Found |
|---------|----------------|------|------------|
| 1       |                | 0.70 | 308.43     |

1: MS ES+  
5.9e+007

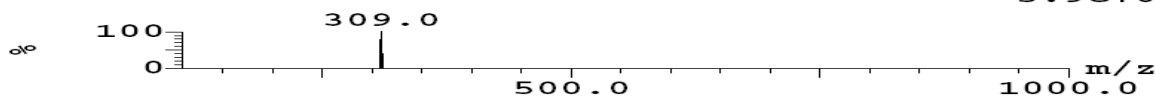

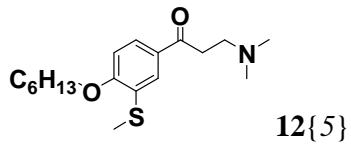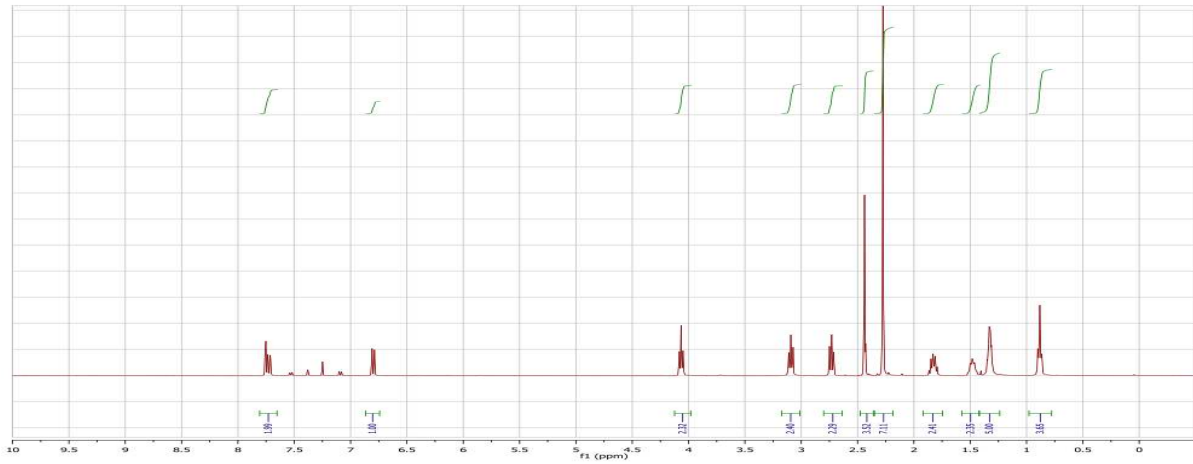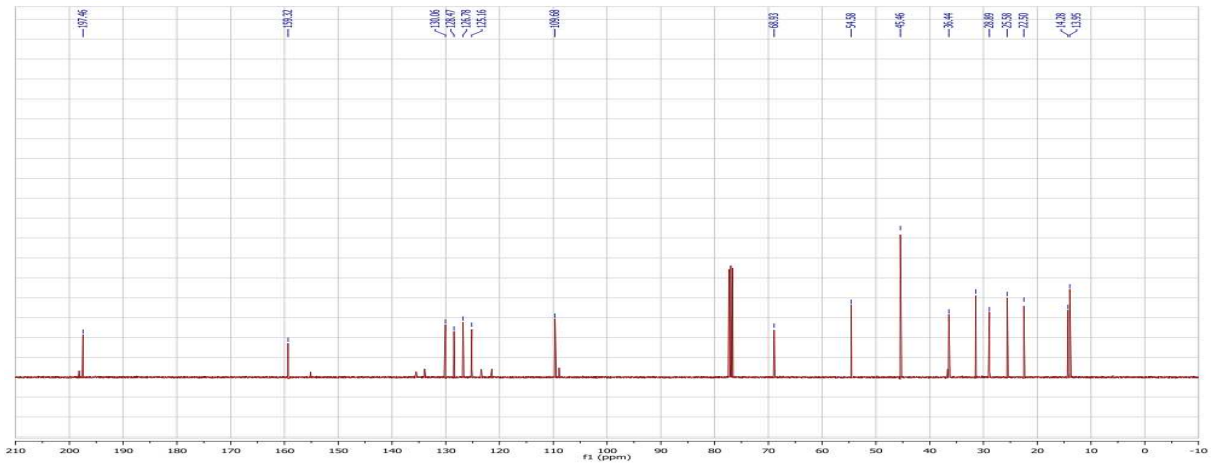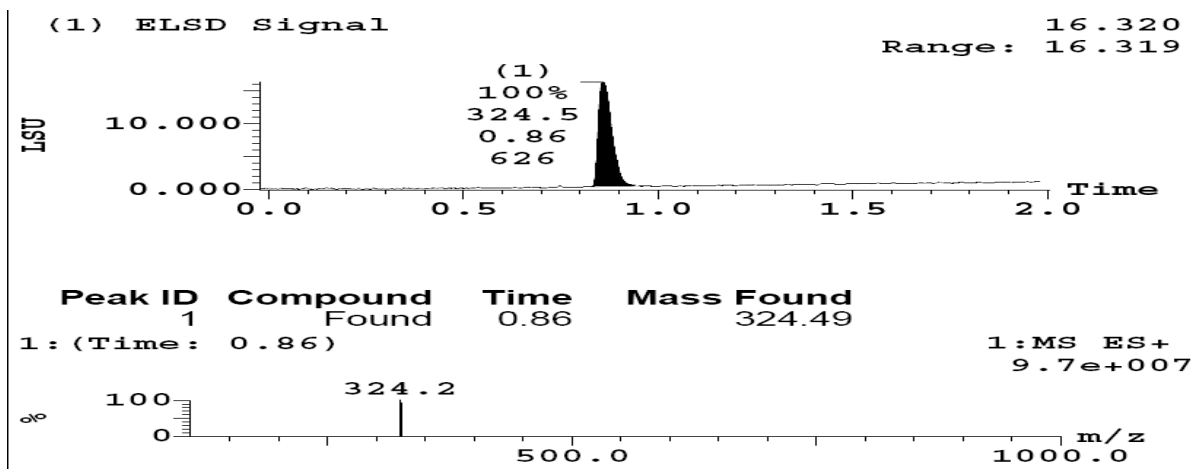

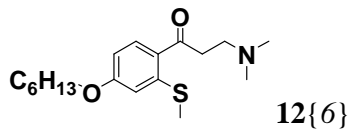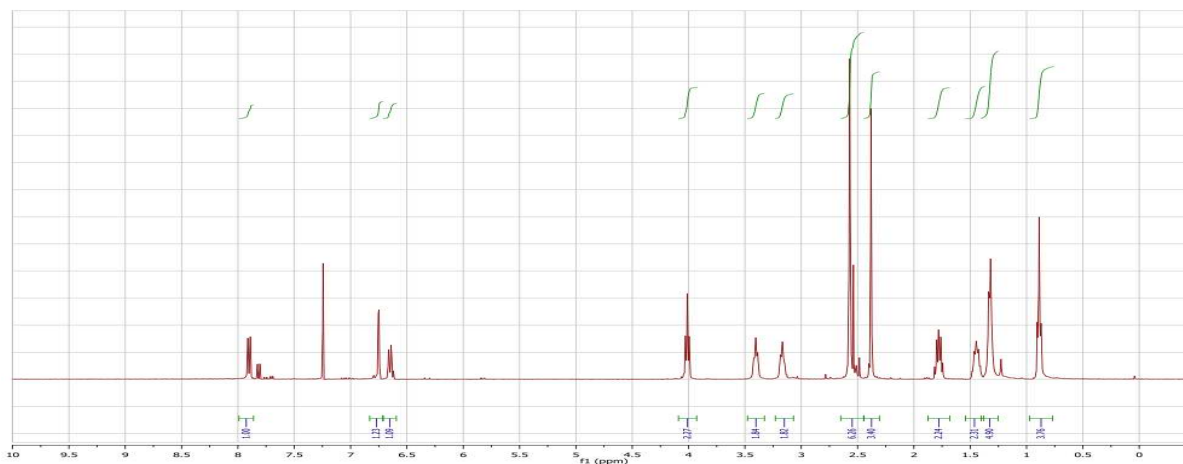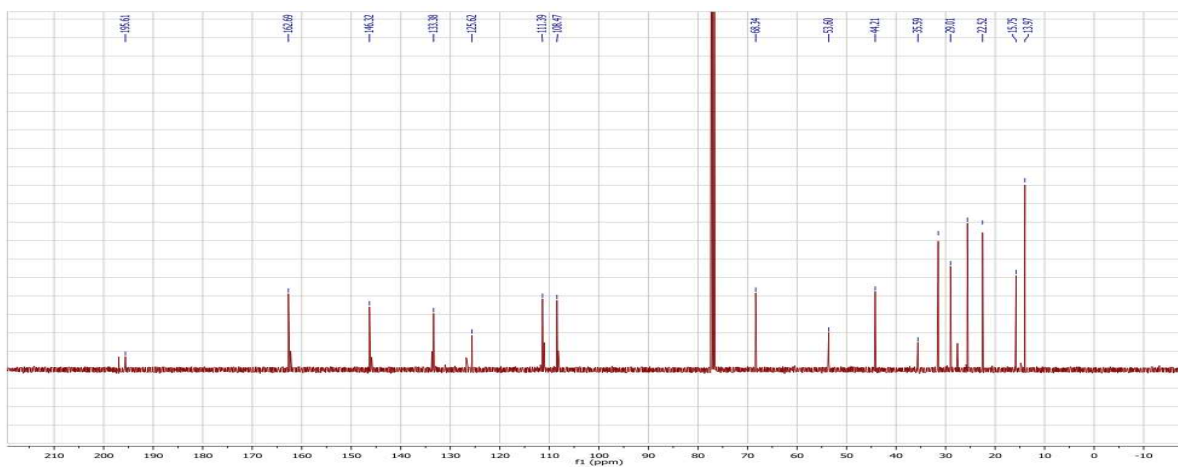

(1) ELSD Signal

18.819  
Range: 18.791

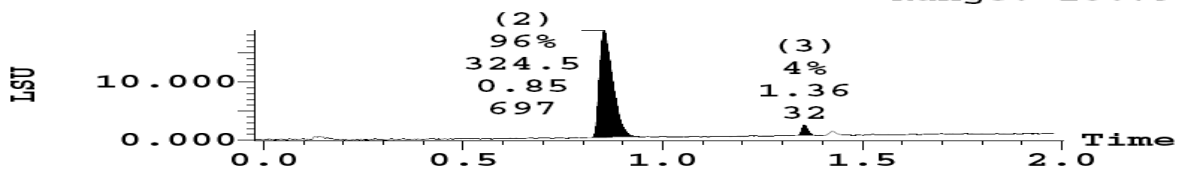

| Peak ID | Compound Found | Time | Mass Found |
|---------|----------------|------|------------|
| 2       |                | 0.85 | 324.49     |

2: (Time: 0.85)

1: MS ES+  
9.7e+007

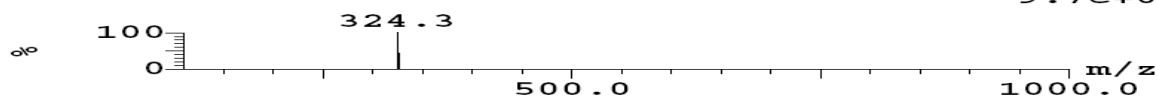

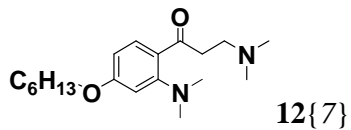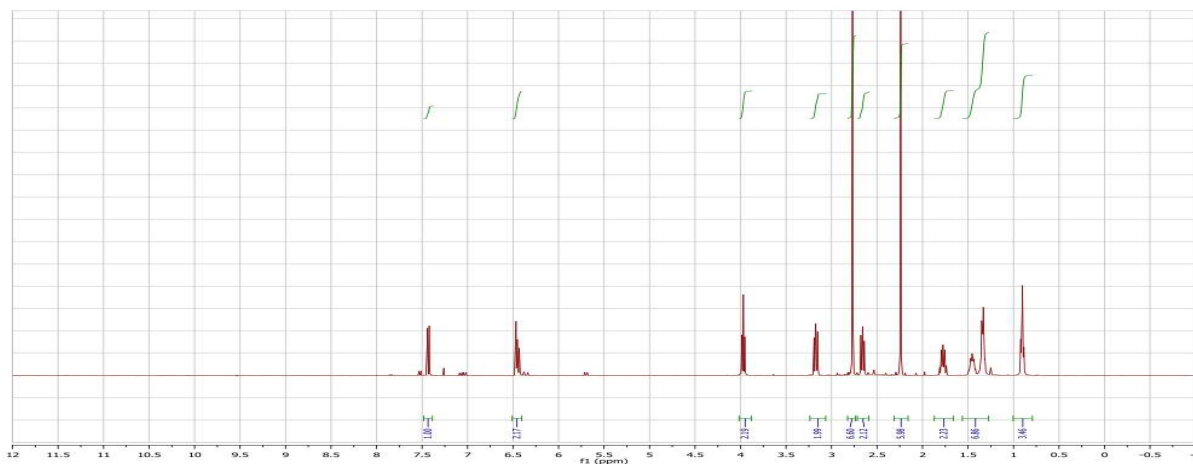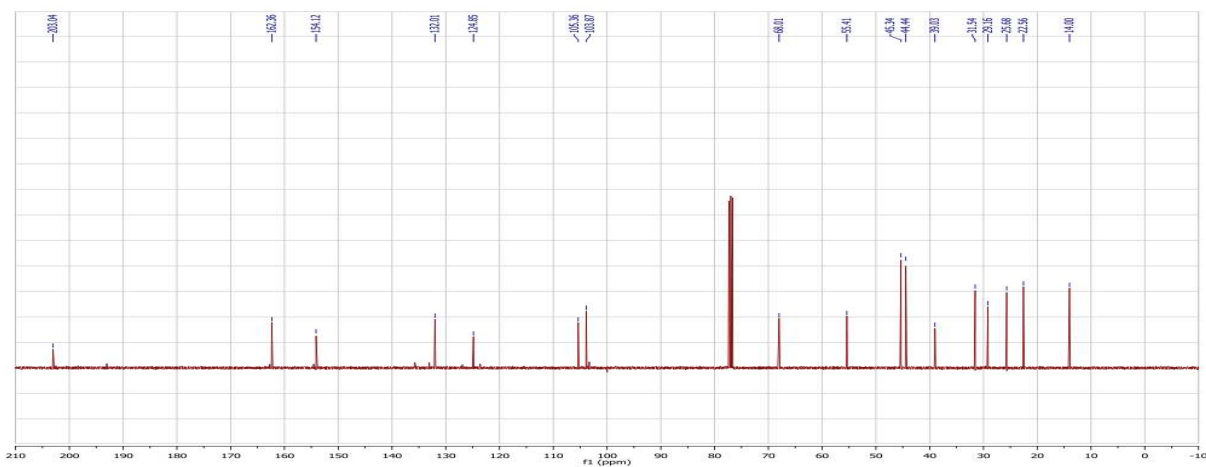

(1) ELSD Signal

144.943  
Range: 144.941

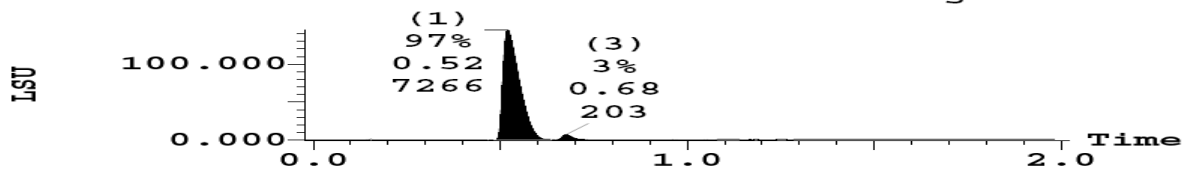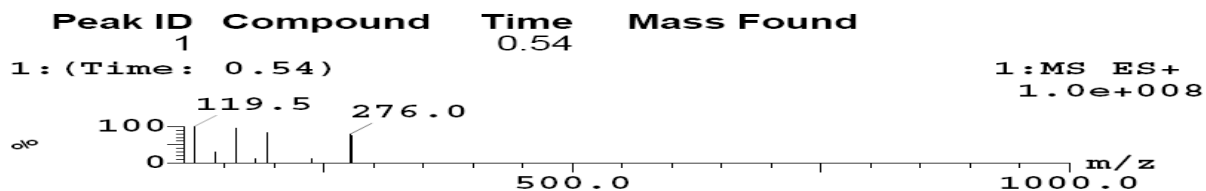

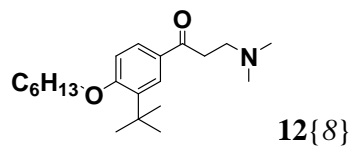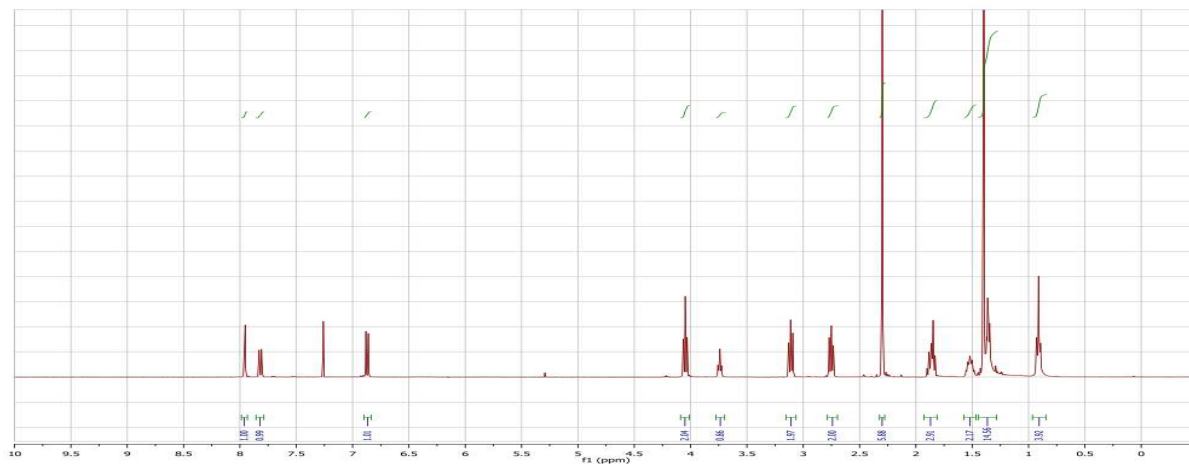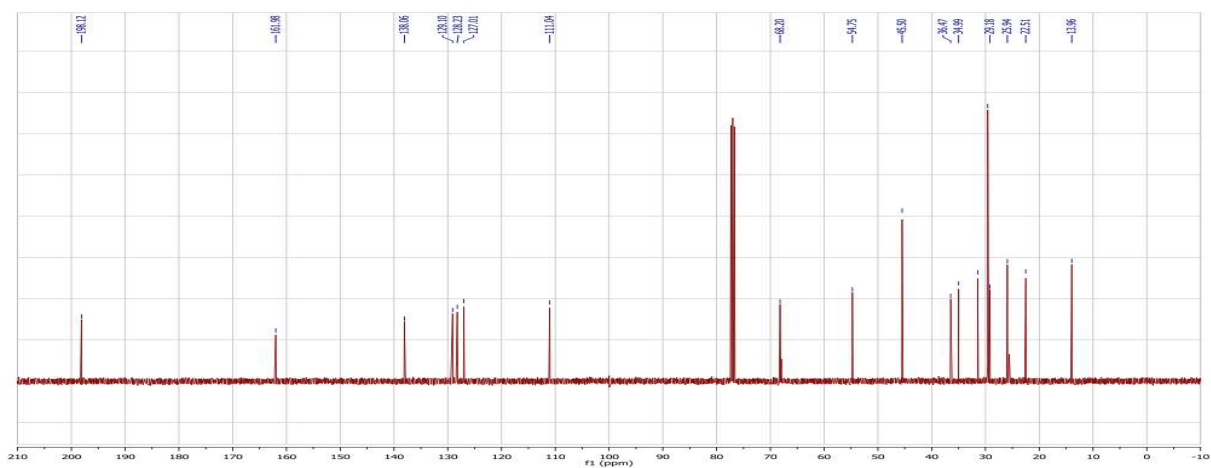

(1) ELSD Signal

15.335  
Range: 15.324

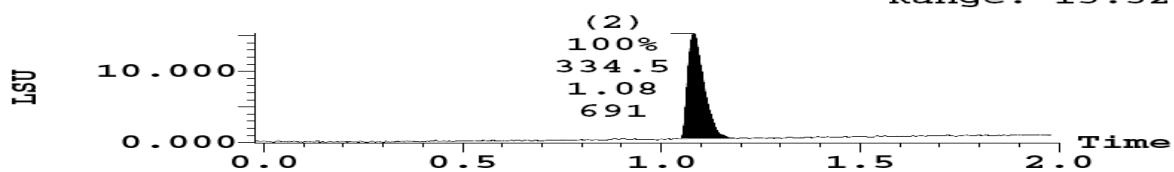

| Peak ID | Compound Found | Time | Mass Found |
|---------|----------------|------|------------|
| 2       |                | 1.09 | 334.51     |

2: (Time: 1.09)

1:MS ES+  
1.1e+008

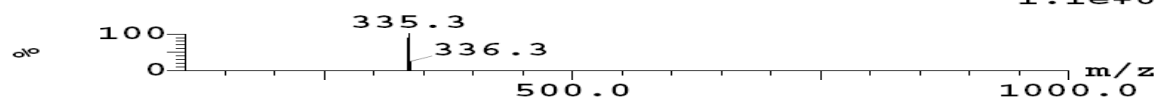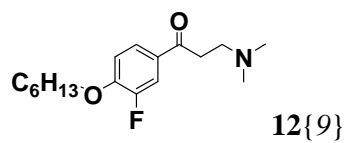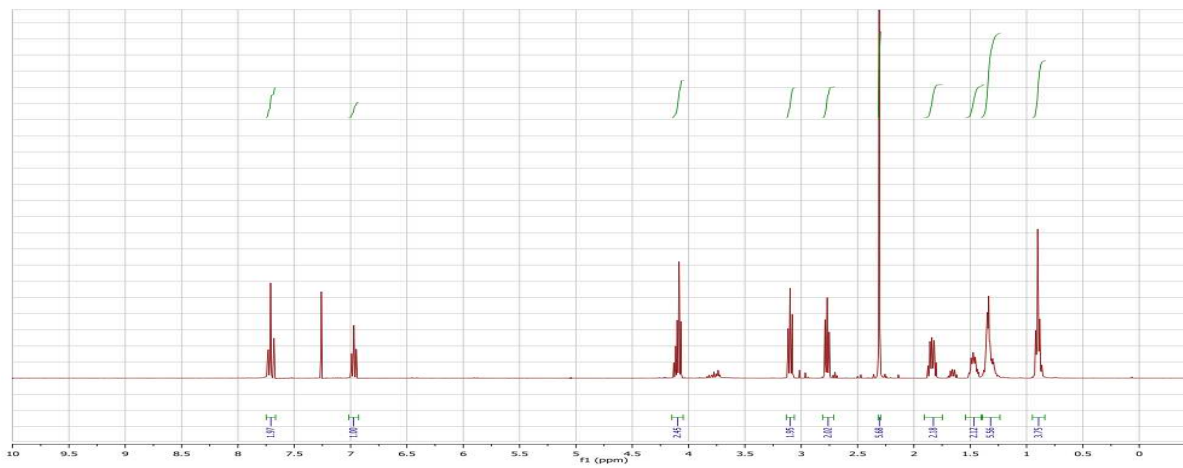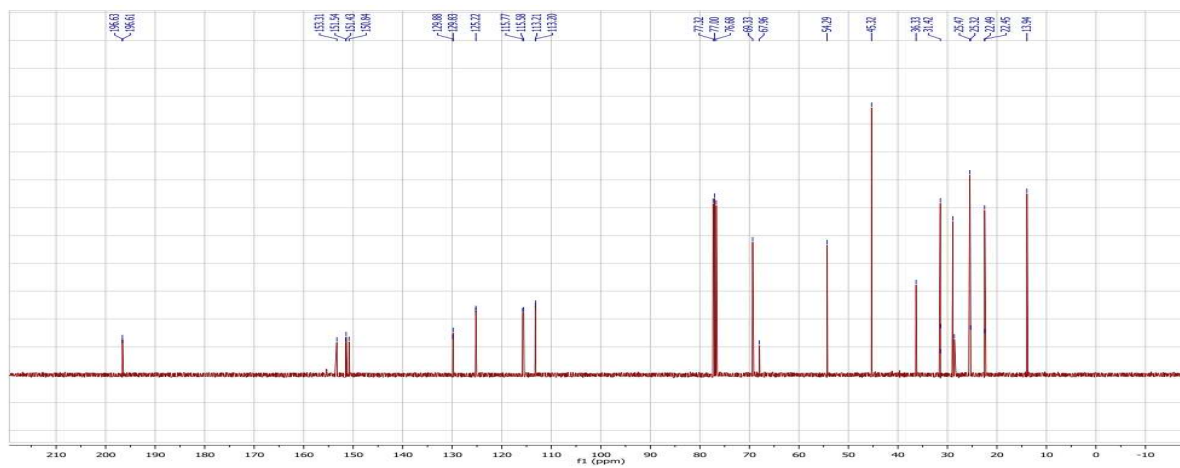

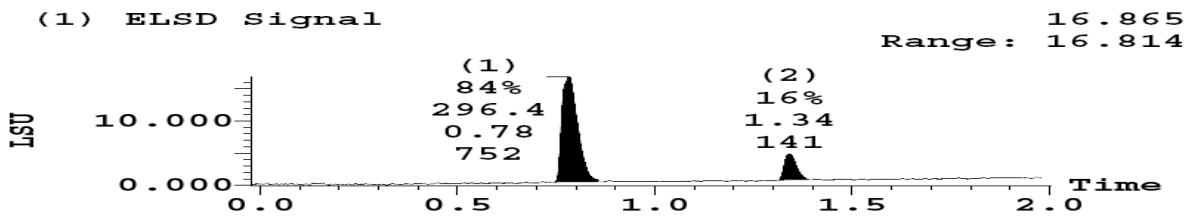

| Peak ID | Compound | Time | Mass Found |
|---------|----------|------|------------|
| 1       | Found    | 0.77 | 296.39     |

1: (Time: 0.77) 1:MS ES+  
9.1e+007

Mass spectrum showing a single peak at m/z 297.2. The y-axis is labeled 'abundance' and the x-axis is 'm/z'.



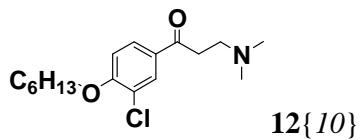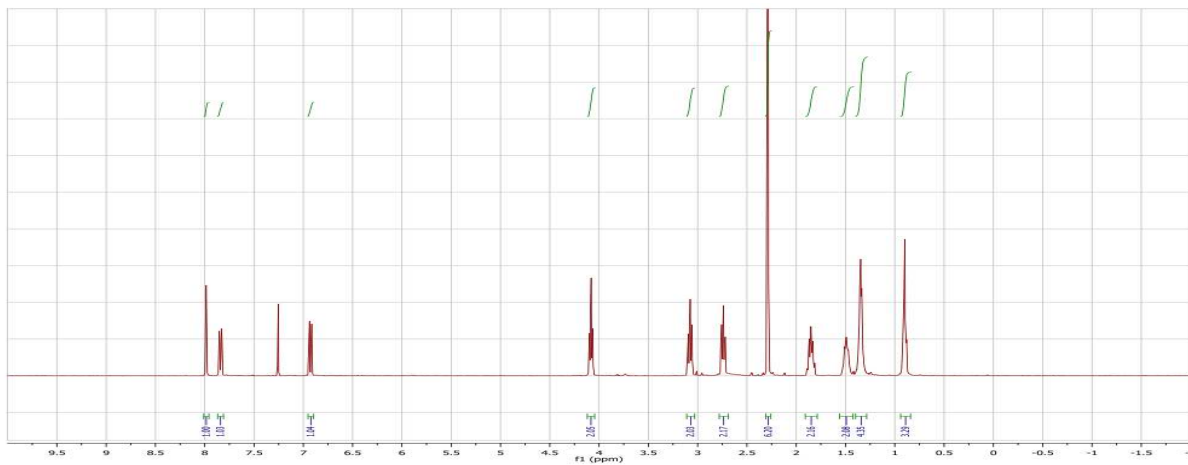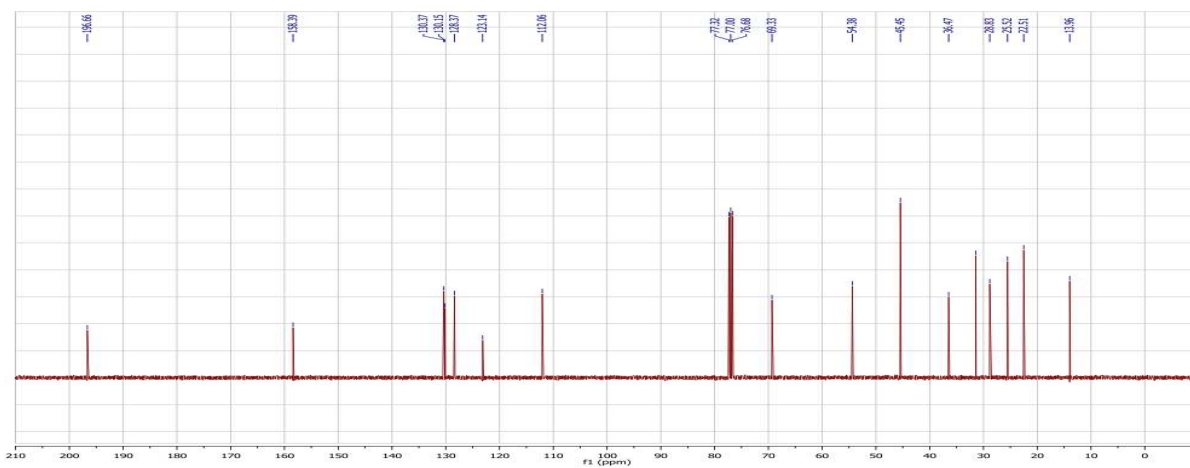

(1) ELSD Signal

86.897  
Range: 86.870

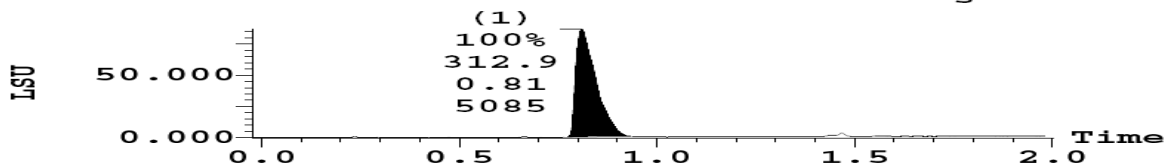

| Peak ID | Compound | Time | Mass Found |
|---------|----------|------|------------|
| 1       | Found    | 0.81 | 312.85     |

1: MS ES+  
8.8e+007

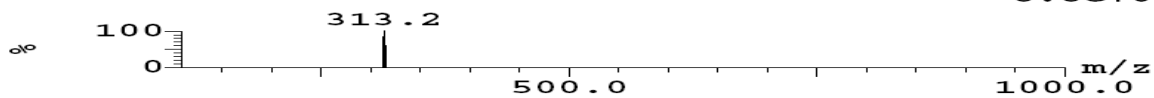

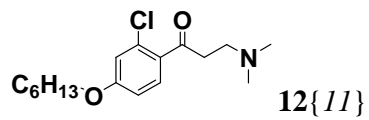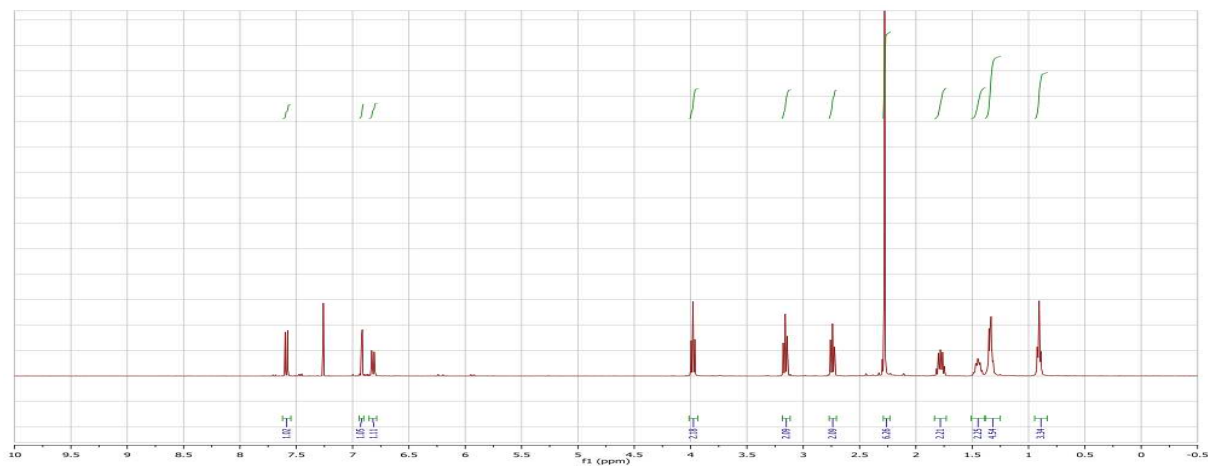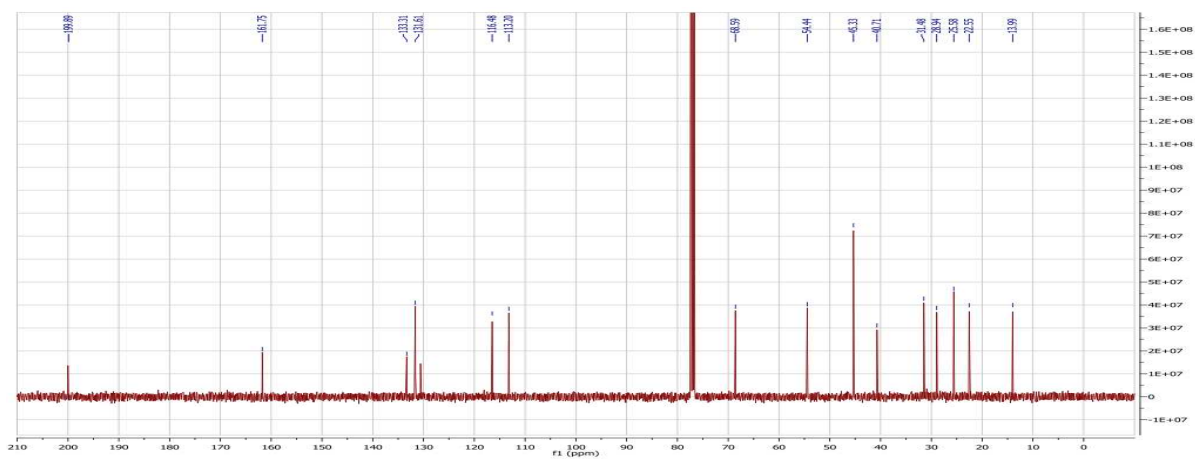

(1) ELSD Signal 60.100  
 Range: 60.097

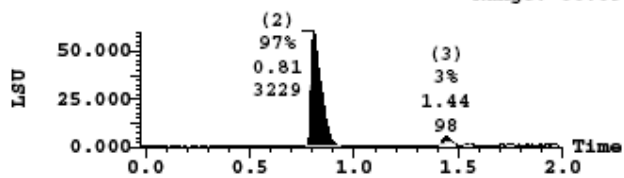

| Peak ID | Compound Found | Time | Mass Found |
|---------|----------------|------|------------|
| 2       | Found          | 0.78 | 312.85     |

1: MS ES+ 9.3e+007  
 2: (Time: 0.78)

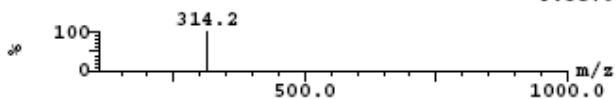

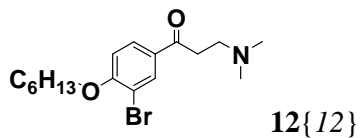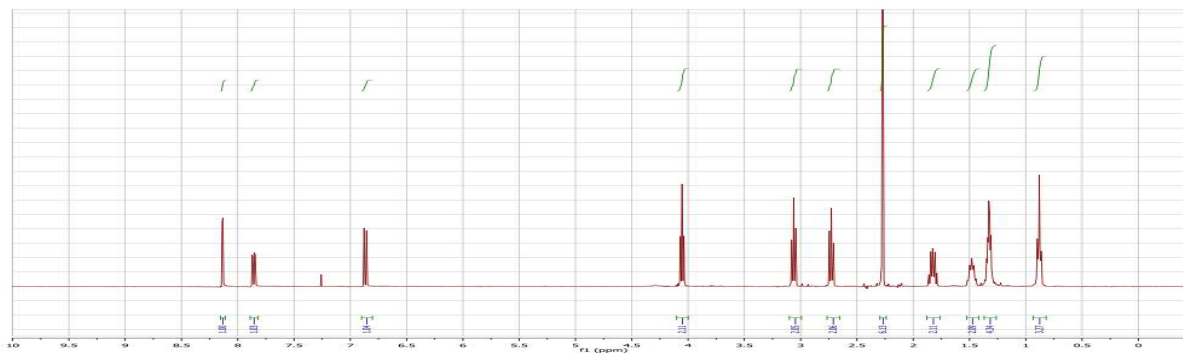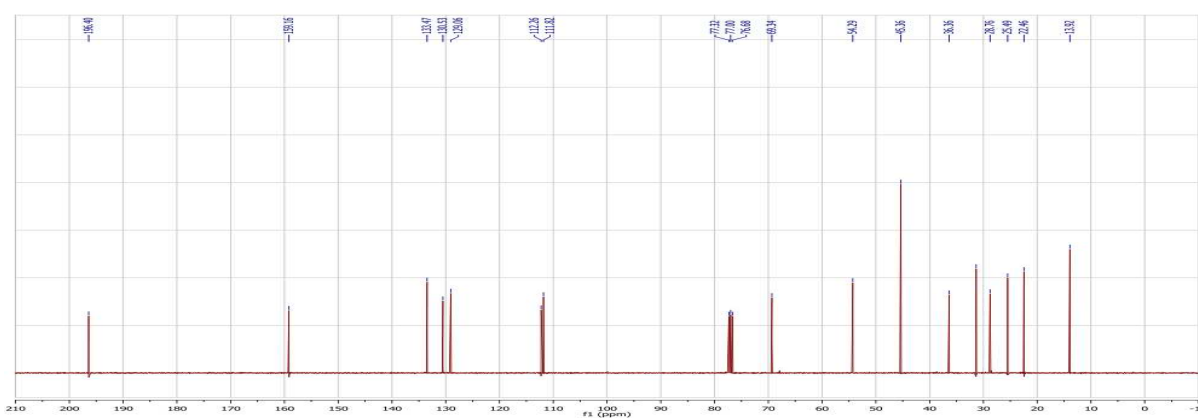

(1) ELSD Signal

53.128  
Range: 53.108

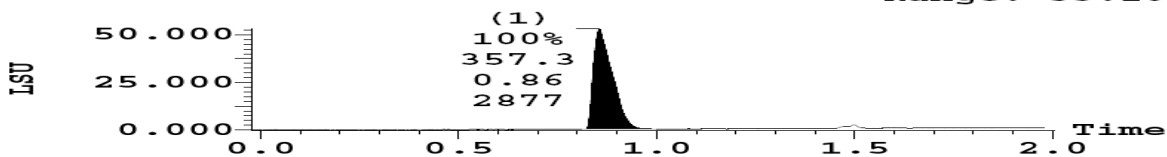

| Peak ID | Compound | Time | Mass Found |
|---------|----------|------|------------|
| 1       | Found    | 0.86 | 357.30     |

1: MS ES+  
9.0e+007

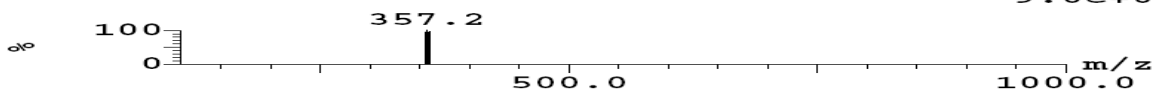

| Peak ID | Compound | Time | Mass Found |
|---------|----------|------|------------|
| 2       | Found    | 0.89 | 357.30     |

1: MS ES+  
1.1e+008

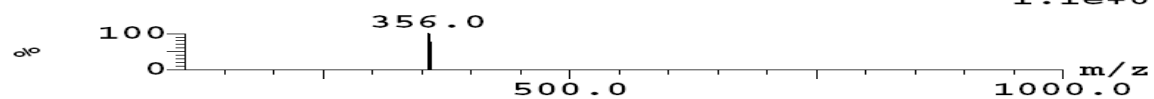

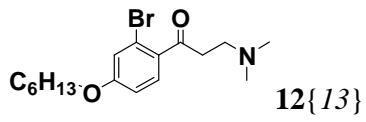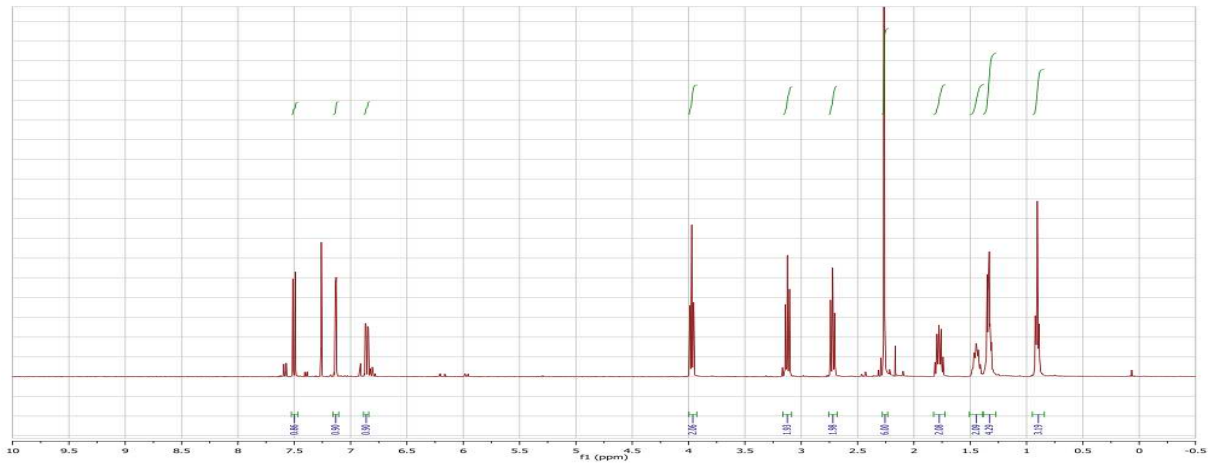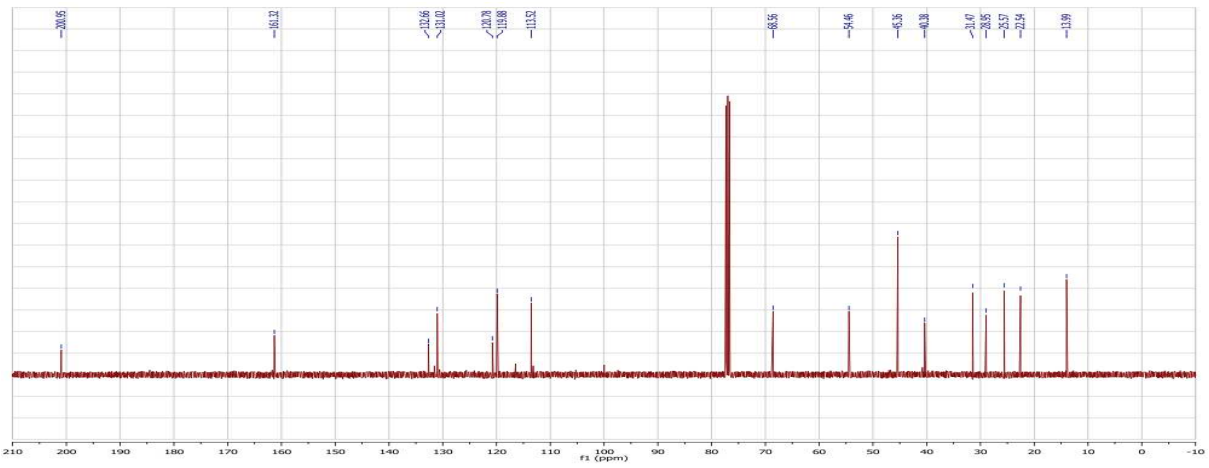

(1) ELSD Signal

Range: 32.440 32.480

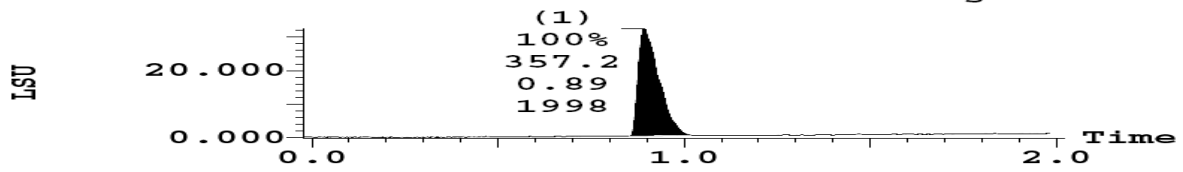

| Peak ID | Compound Found | Time | Mass Found |
|---------|----------------|------|------------|
| 1       | 1              | 0.89 | 357.20     |

1: MS ES+ 6.5e+007

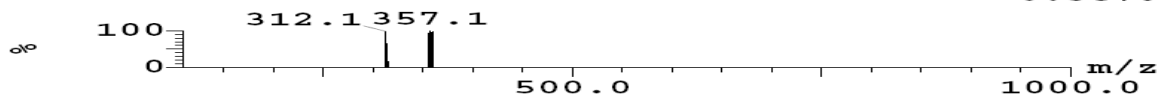

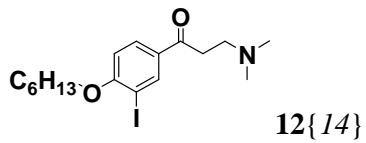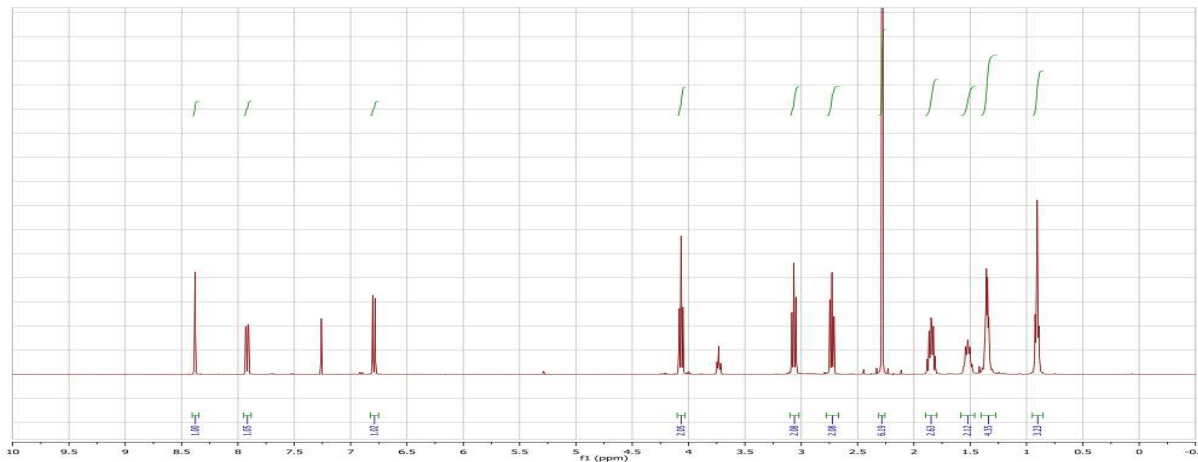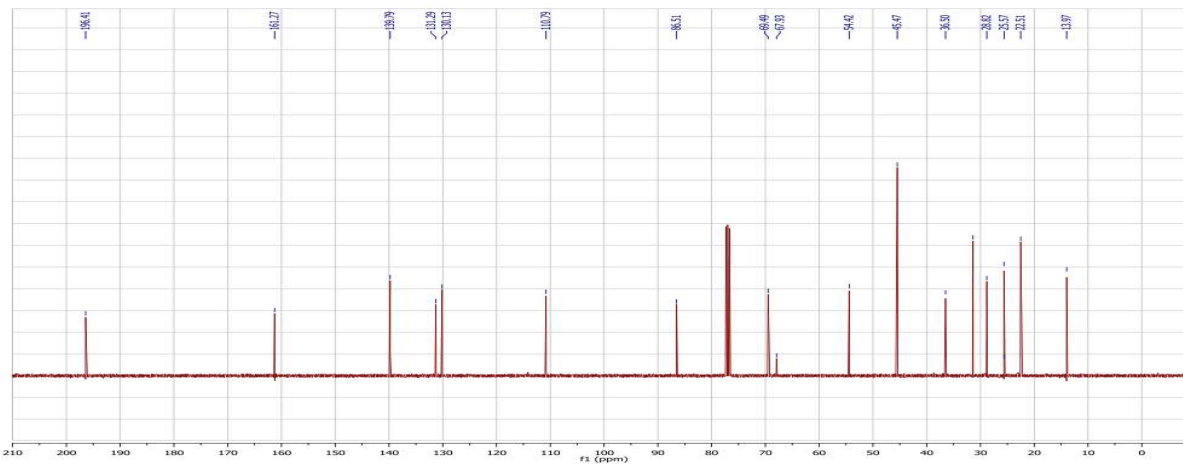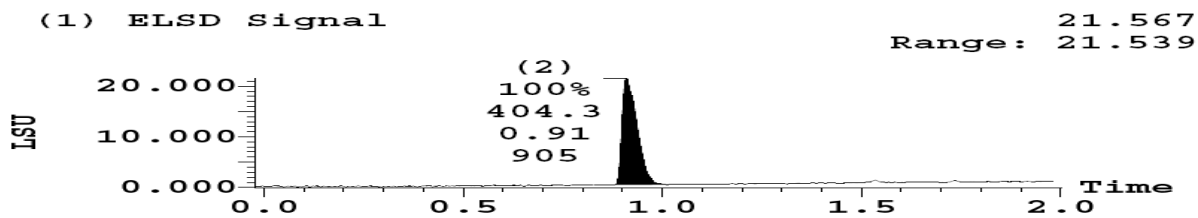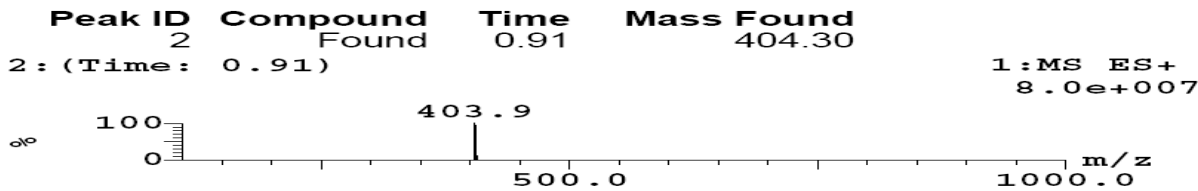

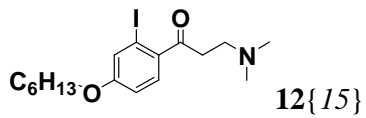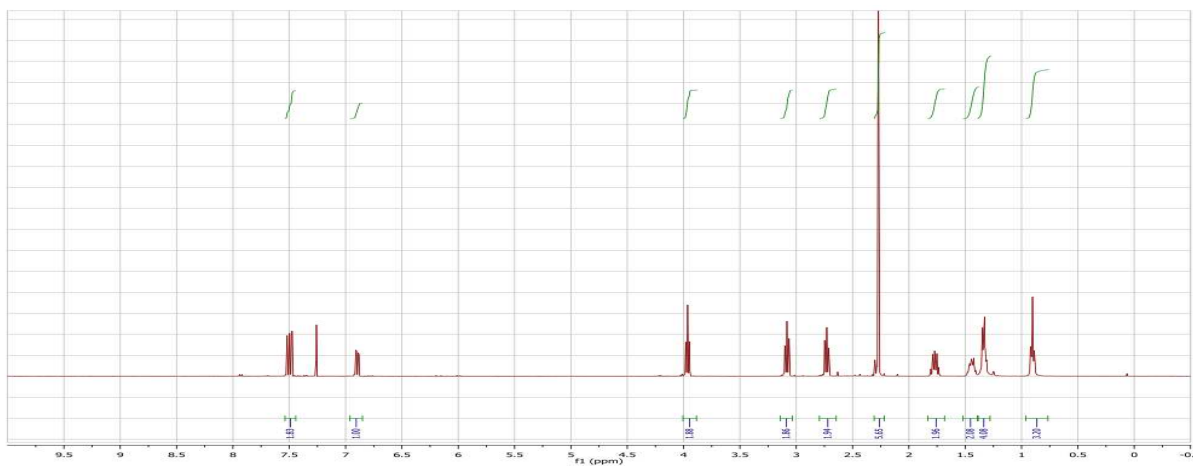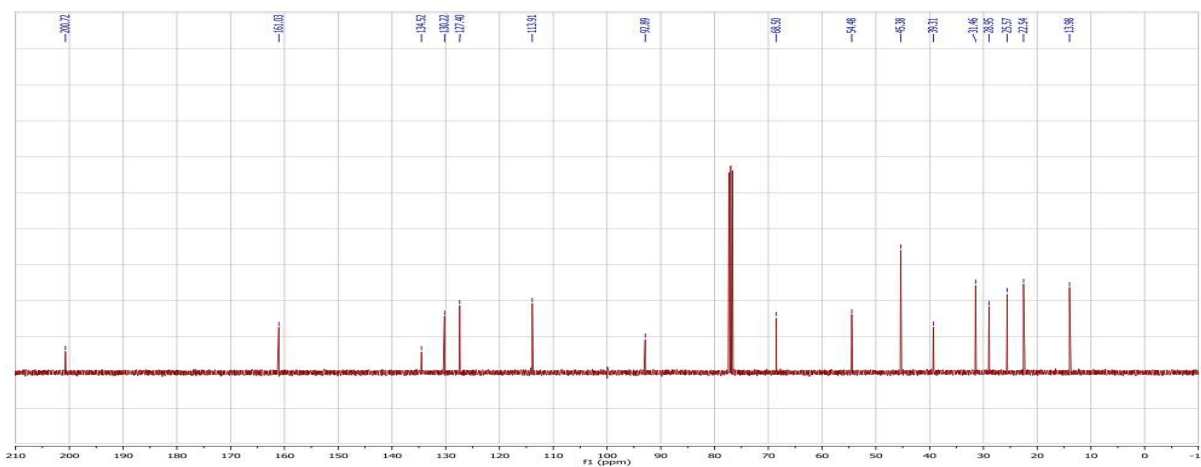

天

(1) ELSD Signal

13.357  
Range: 13.338

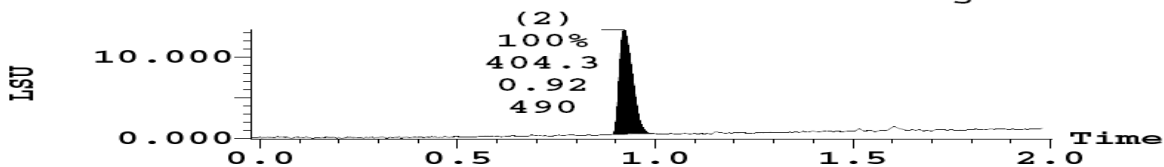

| Peak ID | Compound Found | Time | Mass Found |
|---------|----------------|------|------------|
| 2       |                | 0.92 | 404.30     |

2: (Time: 0.92)

1: MS ES+  
7.8e+007

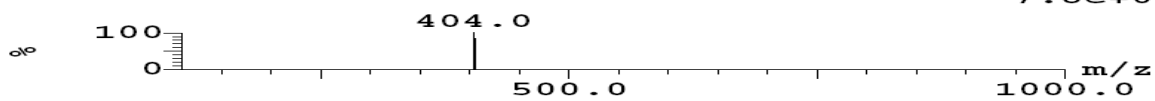

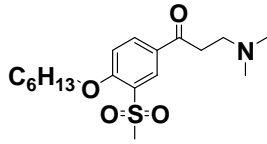

12{16}

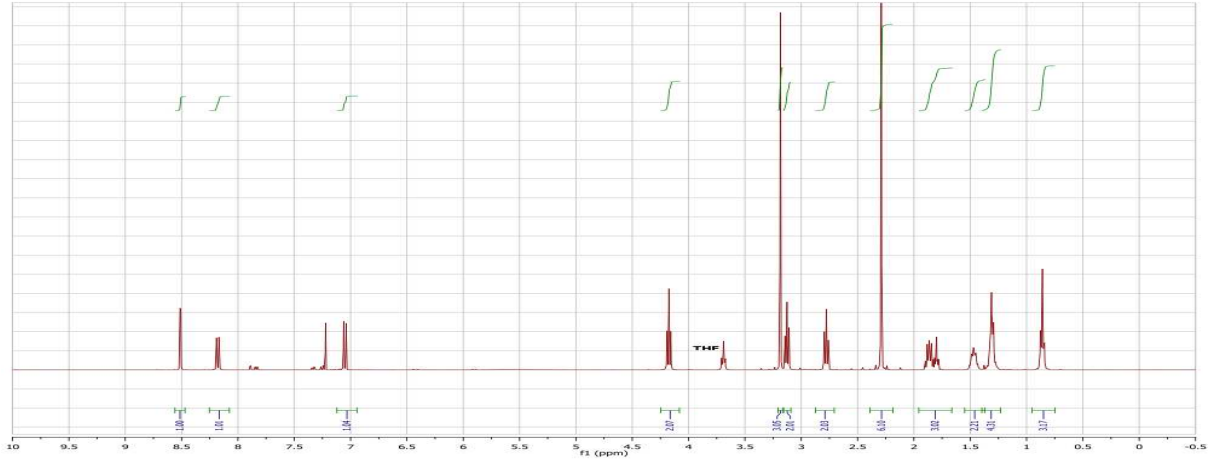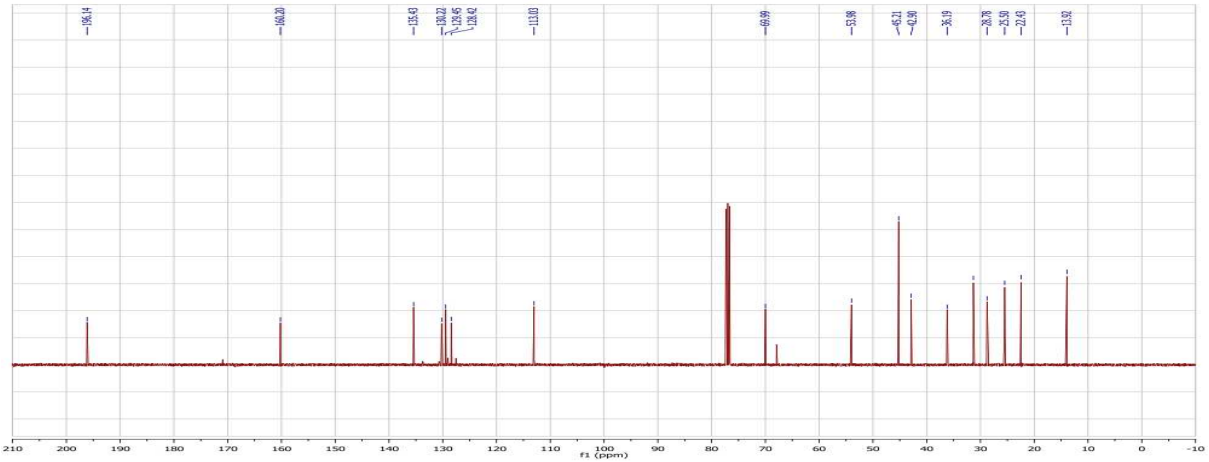

(1) ELSD Signal

56.625  
Range: 56.625

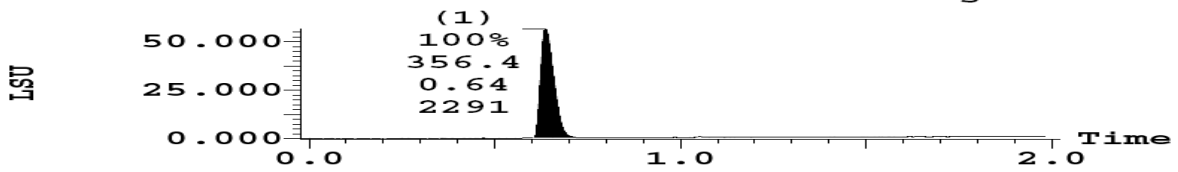

| Peak ID | Compound Found | Time | Mass Found |
|---------|----------------|------|------------|
| 1       |                | 0.64 | 356.39     |

1: (Time: 0.64)

1:MS ES+  
1.1e+008

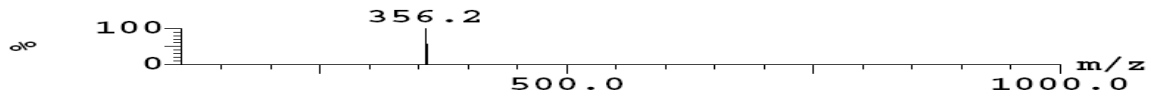

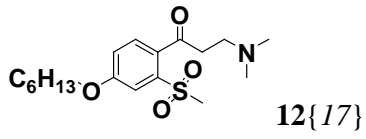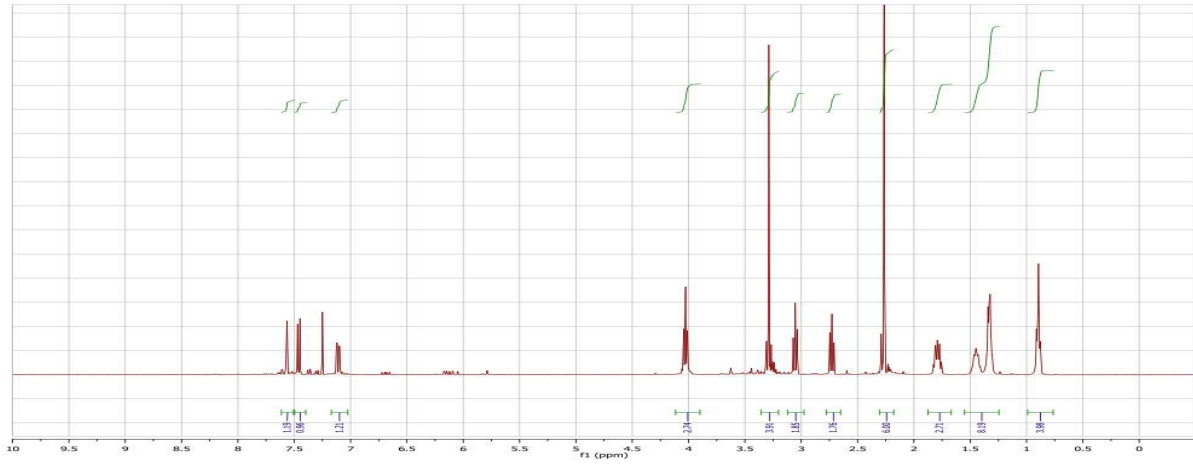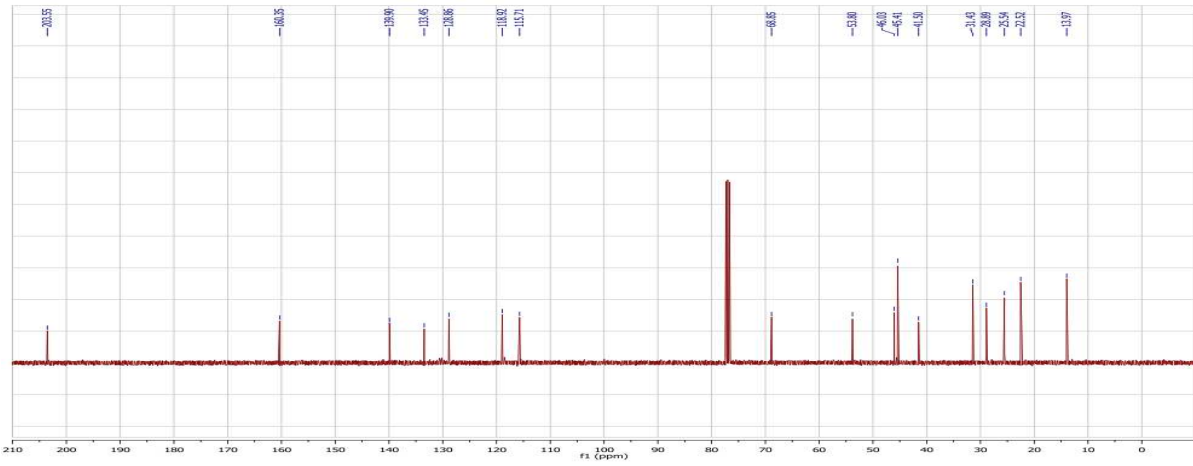

(1) ELSD Signal

55.397  
Range: 55.320

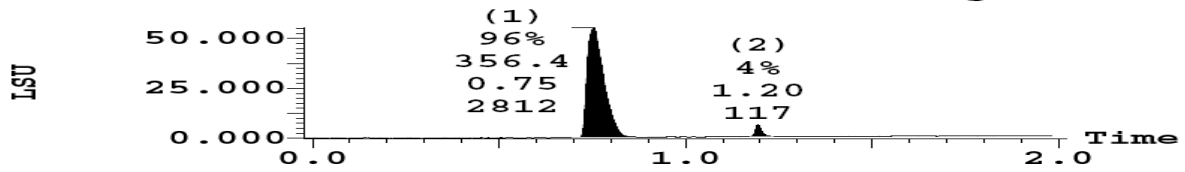

| Peak ID | Compound | Time | Mass Found |
|---------|----------|------|------------|
| 1       | Found    | 0.76 | 356.39     |

1:MS ES+  
1.3e+008

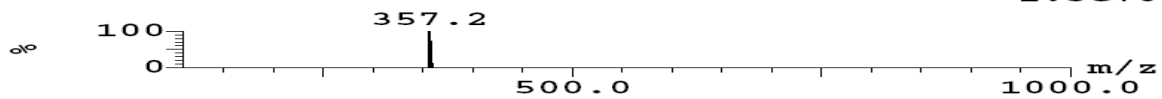



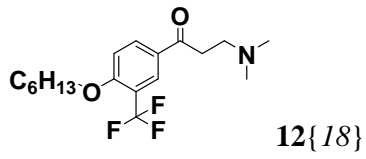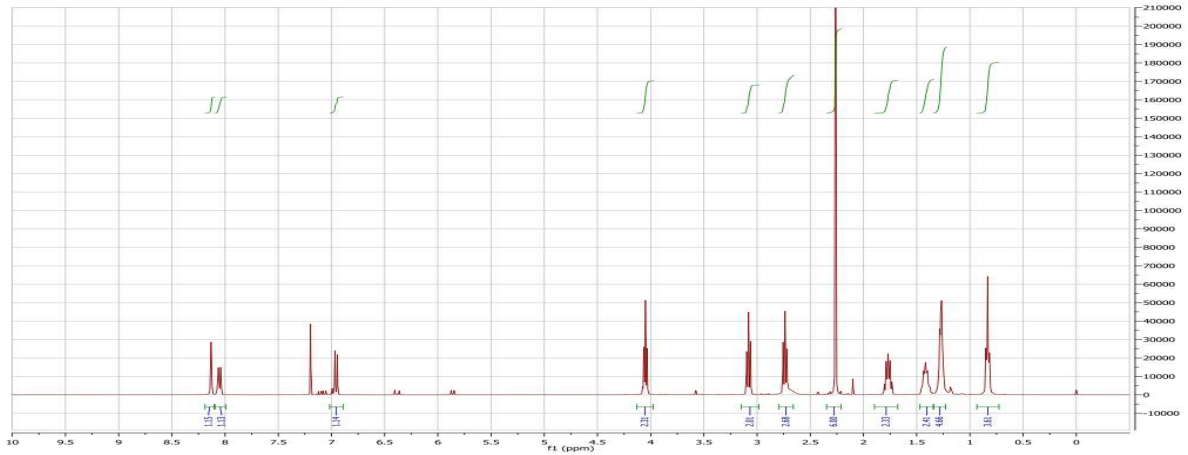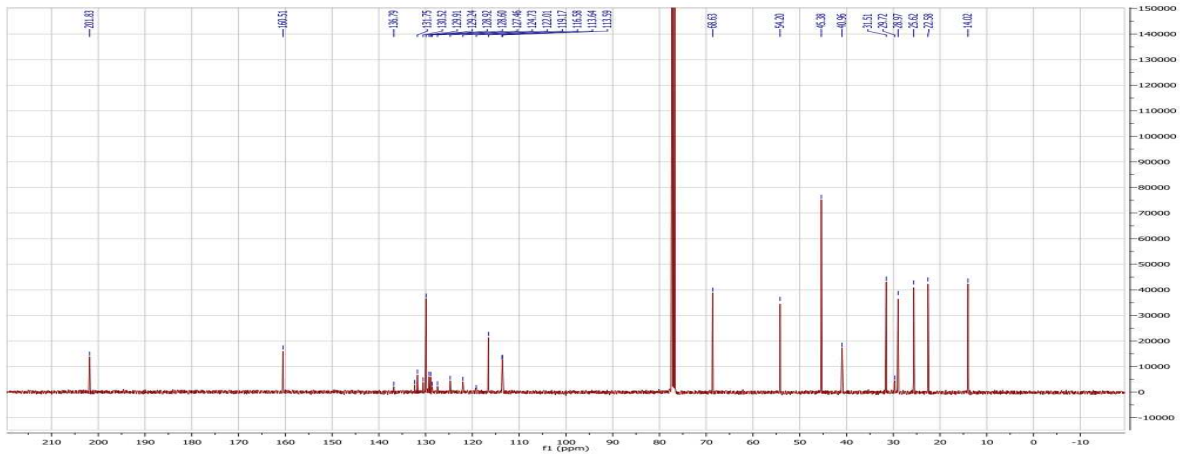

(1) ELSD Signal

28.162  
Range: 28.145

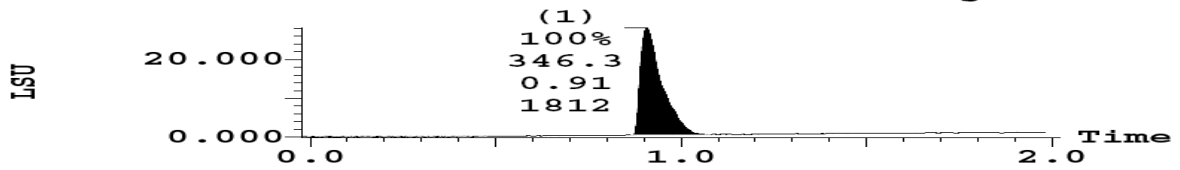

| Peak ID | Compound | Time | Mass Found |
|---------|----------|------|------------|
| 1       | Found    | 0.91 | 346.30     |

1: (Time: 0.91)

1: MS ES+  
9.8e+007

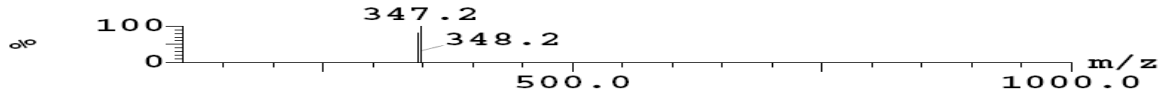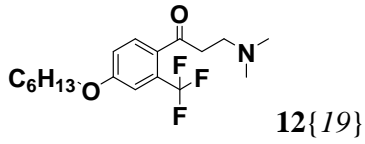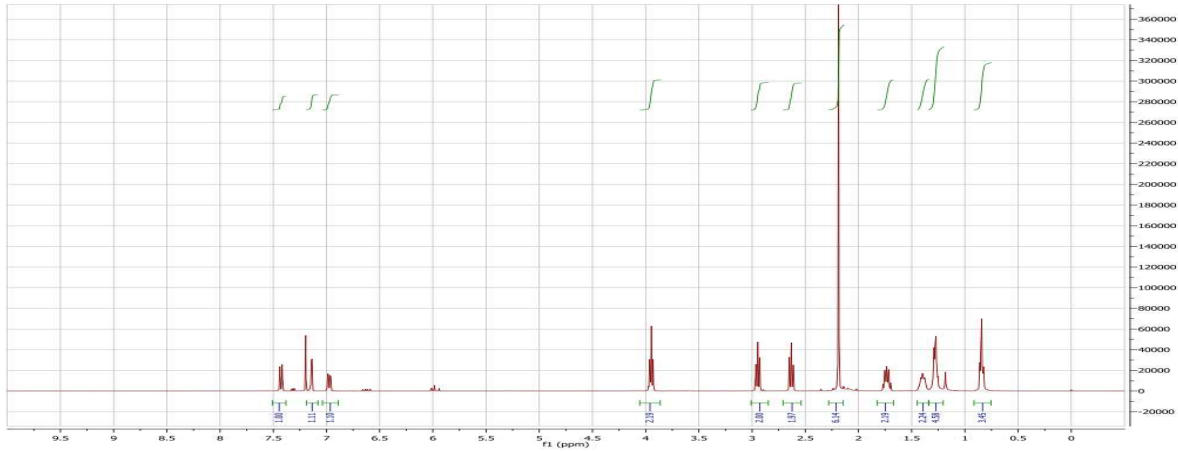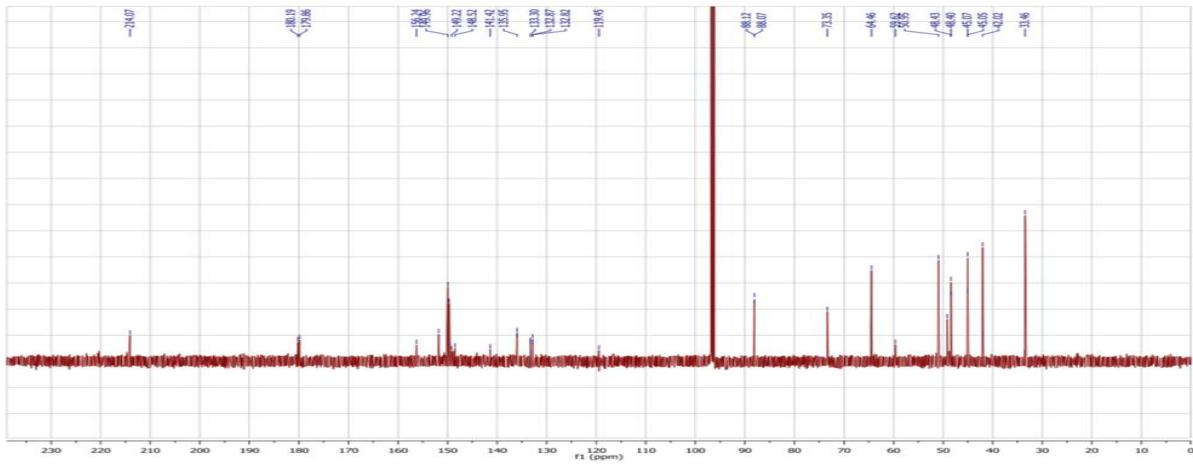

(1) ELSD Signal

8.324  
Range: 8.274

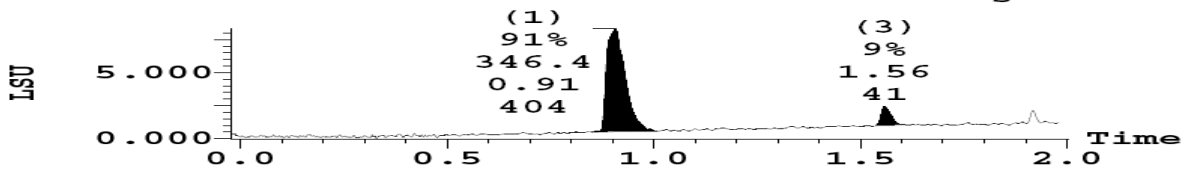

| Peak ID | Compound | Time | Mass Found |
|---------|----------|------|------------|
| 2       | Found    | 0.96 | 346.40     |

2: (Time: 0.96)

1: MS ES+  
1.1e+008

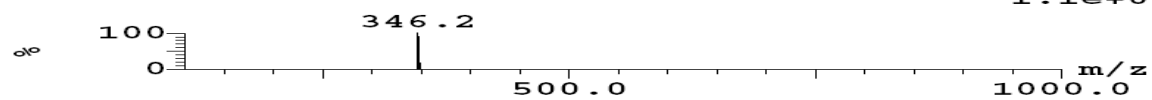

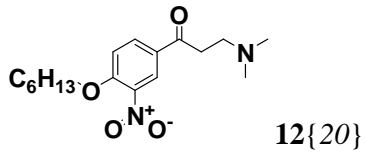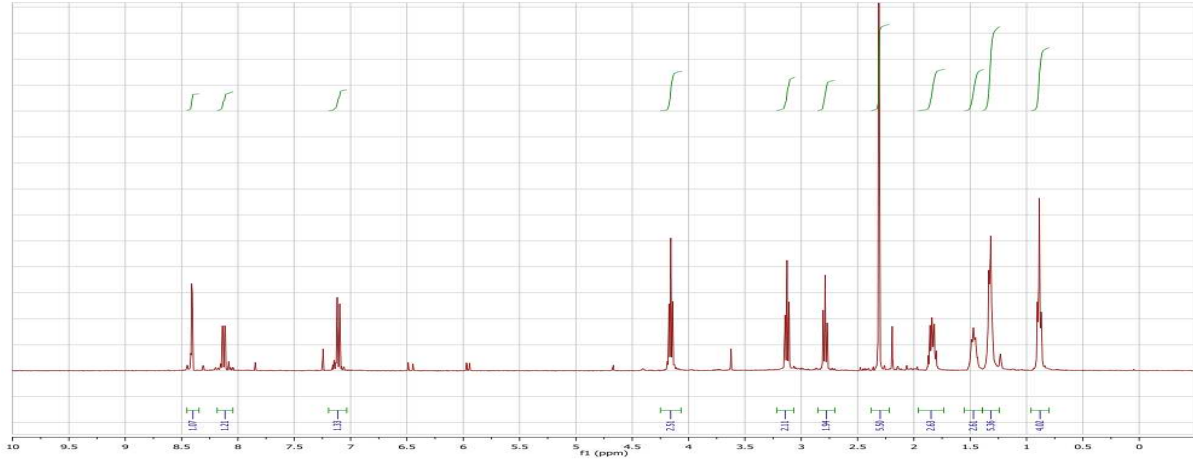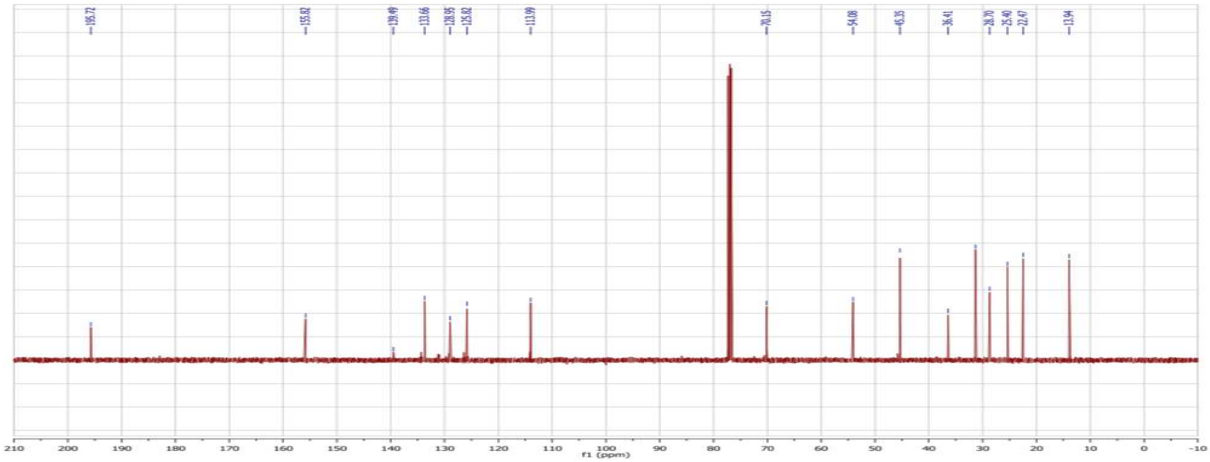

(1) ELSD Signal

3.022  
Range: 3.007

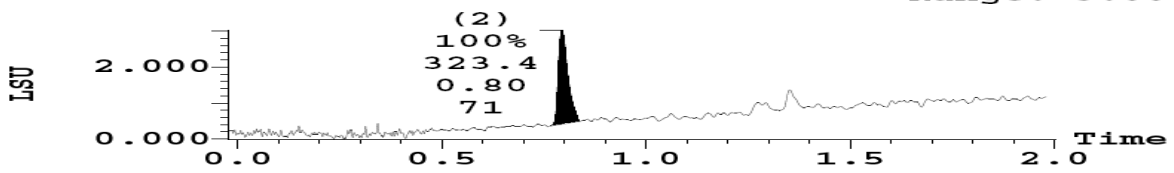

| Peak ID | Compound | Time | Mass Found |
|---------|----------|------|------------|
| 2       | Found    | 0.80 | 323.40     |

1:MS ES+  
7.7e+007

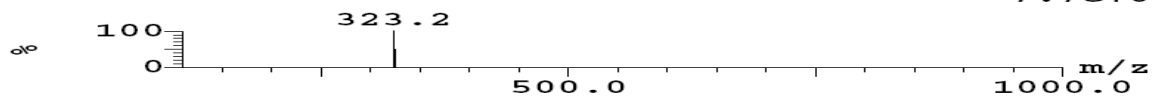

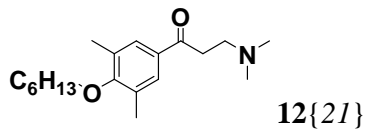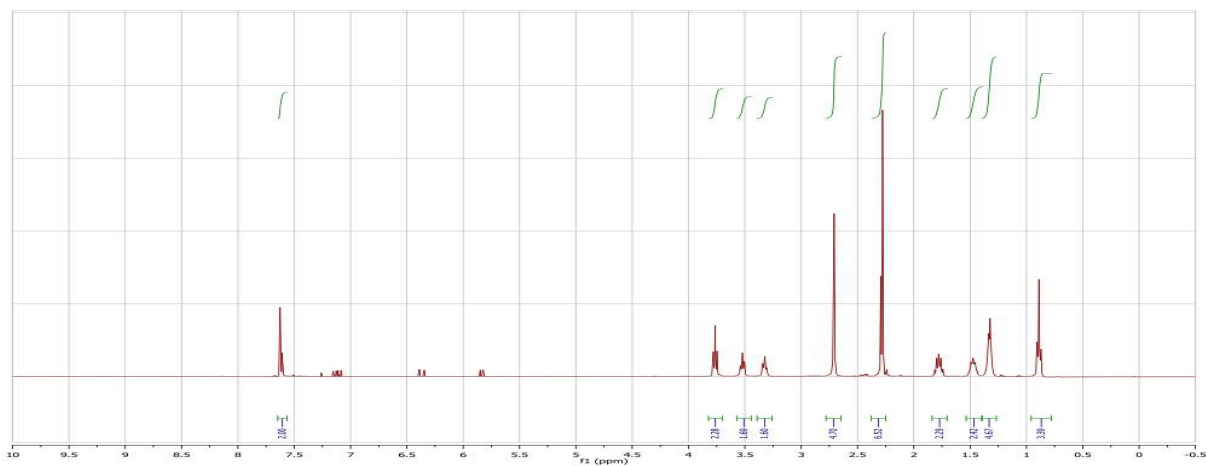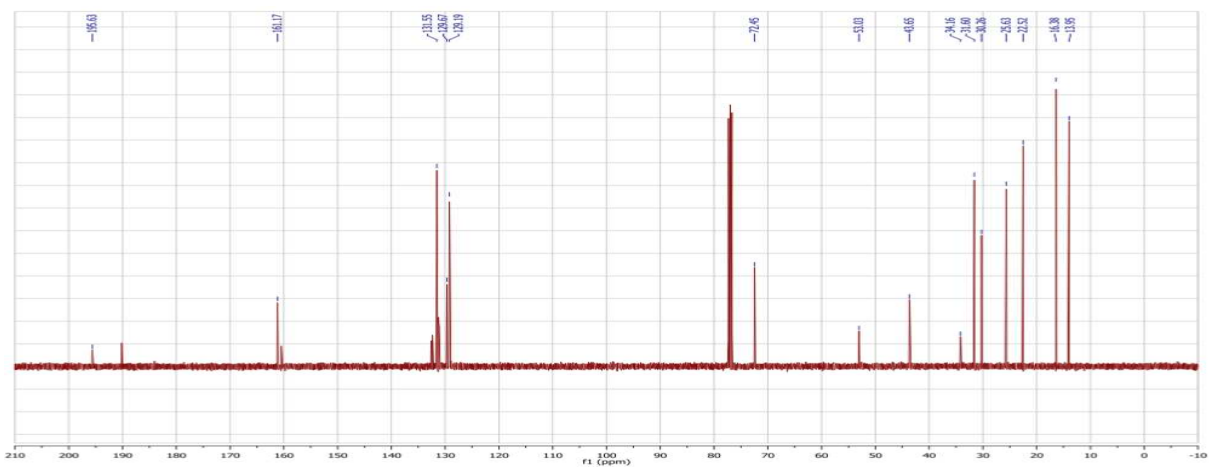

(1) ELSD Signal

39.986  
Range: 39.943

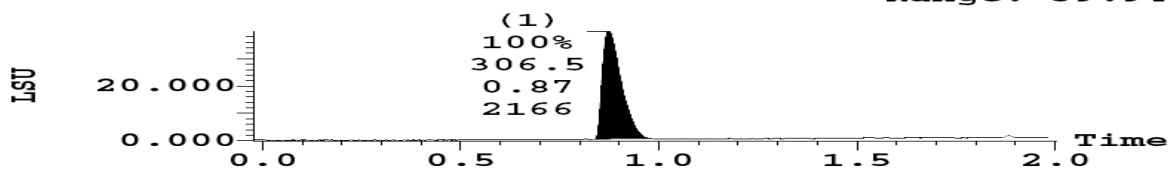

| Peak ID | Compound | Time | Mass Found |
|---------|----------|------|------------|
| 1       | Found    | 0.86 | 306.45     |

1:MS ES+  
8.5e+007

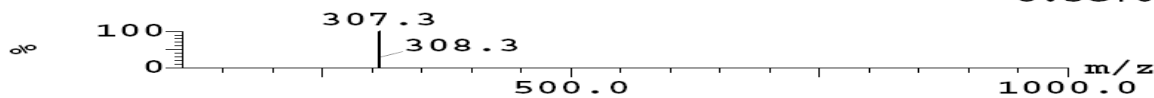

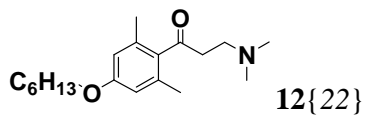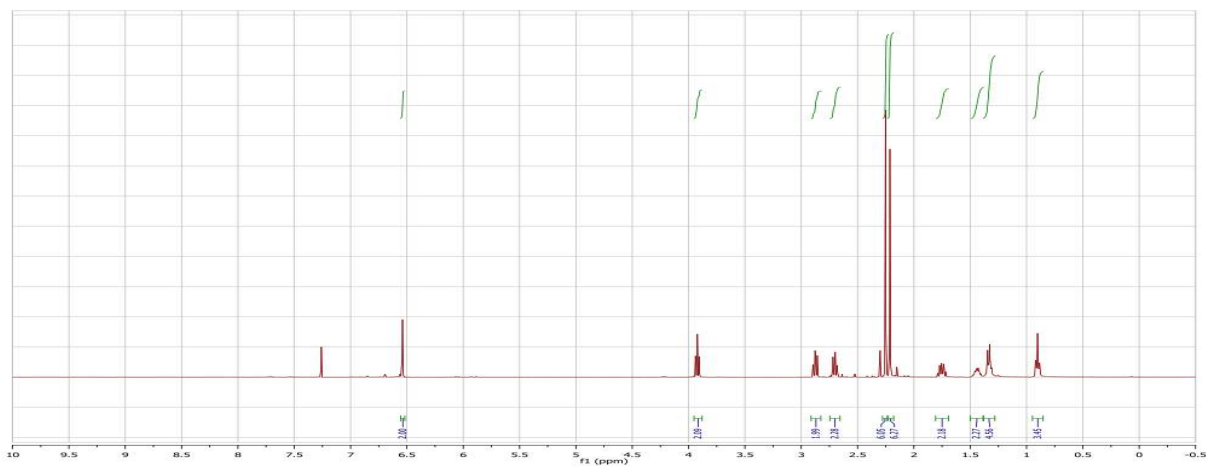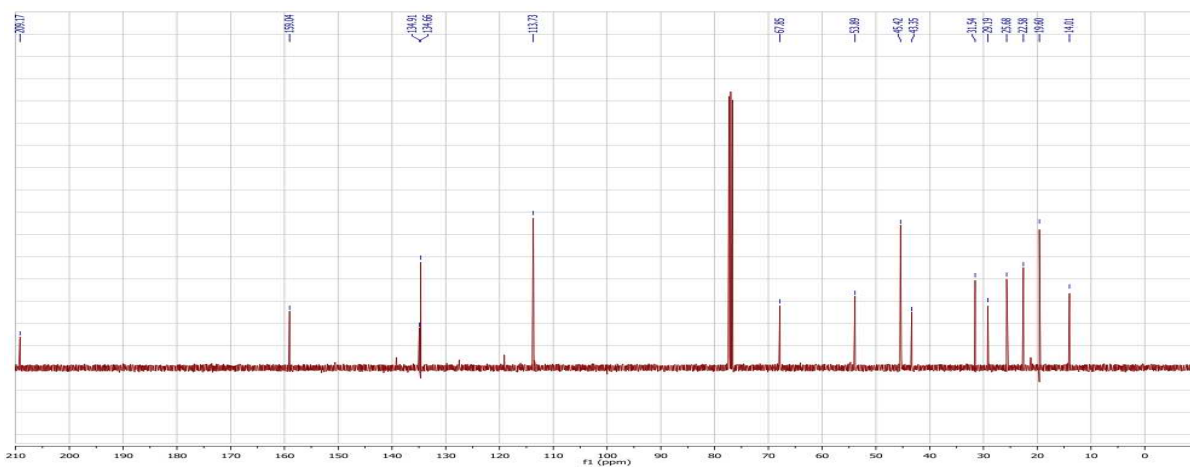

(1) ELSD Signal

27.566  
Range: 27.481

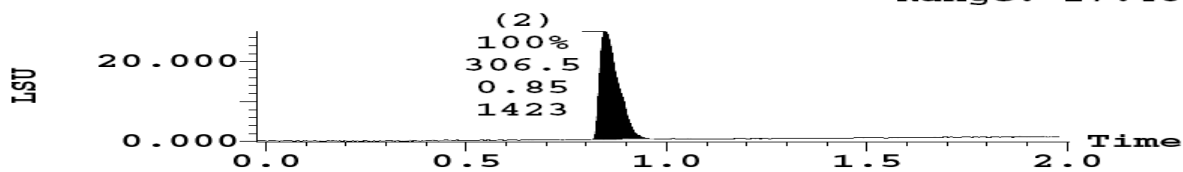

| Peak ID | Compound | Time | Mass Found |
|---------|----------|------|------------|
| 2       | Found    | 0.84 | 306.45     |

2: (Time: 0.84)

1:MS ES+  
8.8e+007

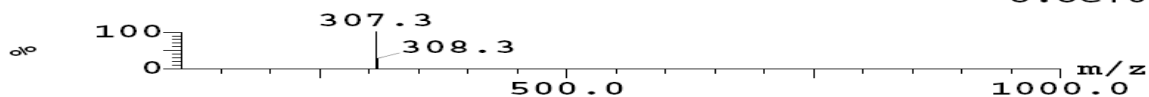

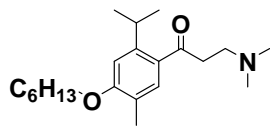

12{23}

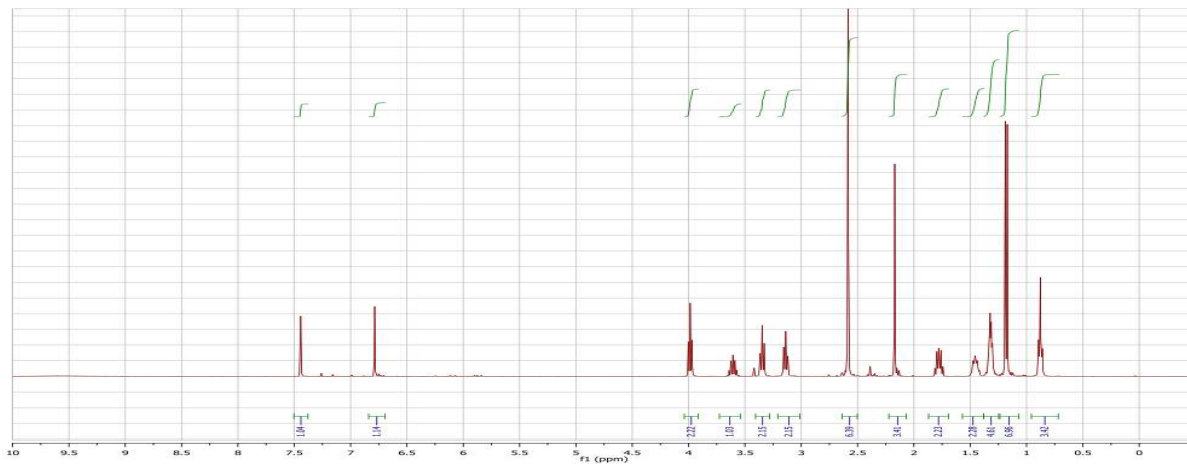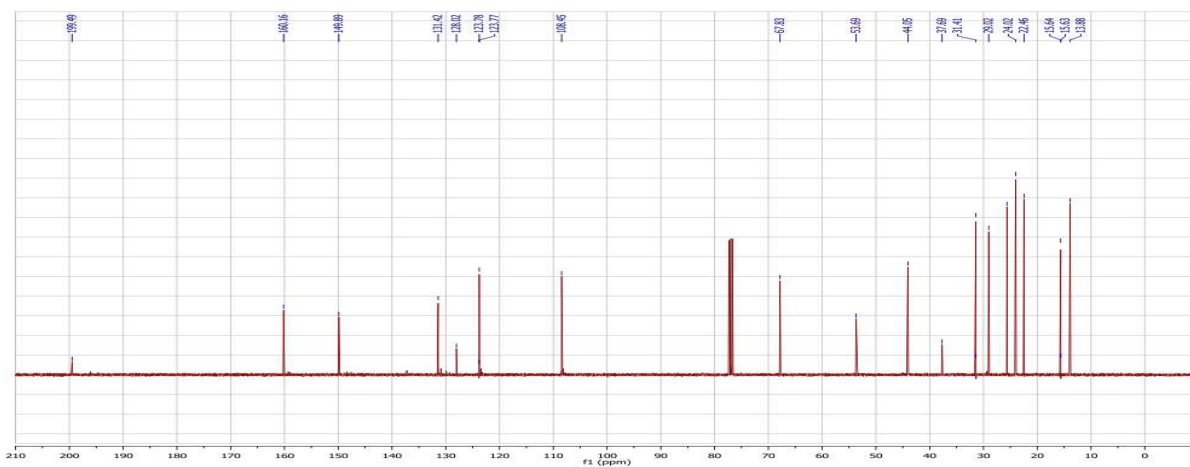

(1) ELSD Signal

17.933  
Range: 17.897

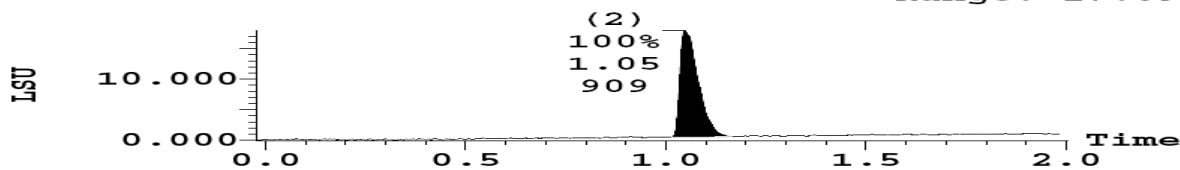

| Peak ID | Compound | Time | Mass Found |
|---------|----------|------|------------|
| 3       | Found    | 1.12 | 334.51     |

3: (Time: 1.12) 1:MS ES+ 1.3e+008

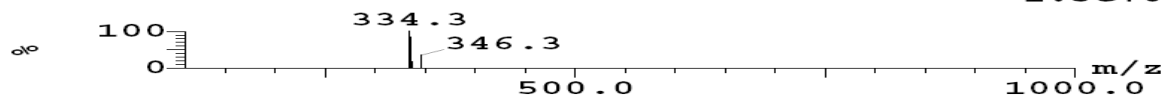

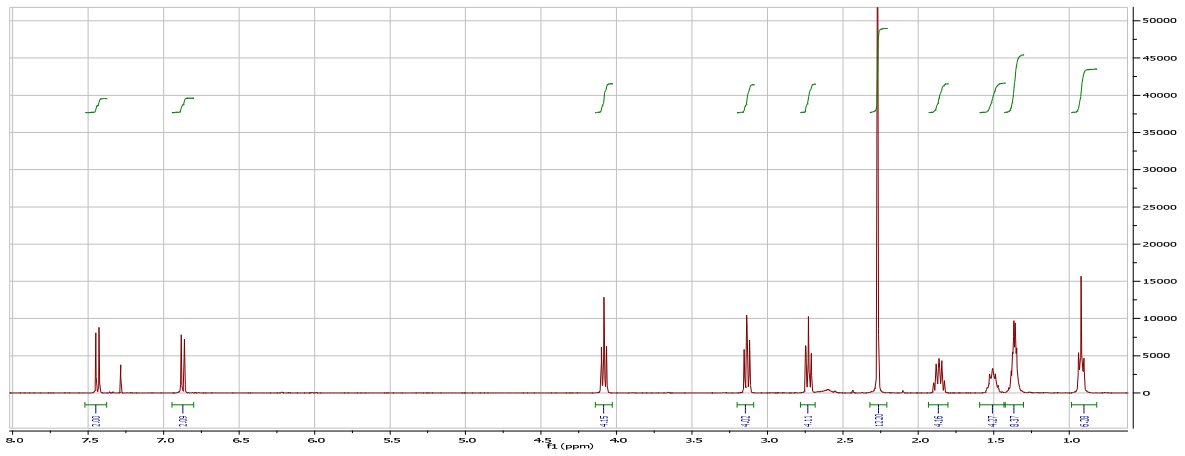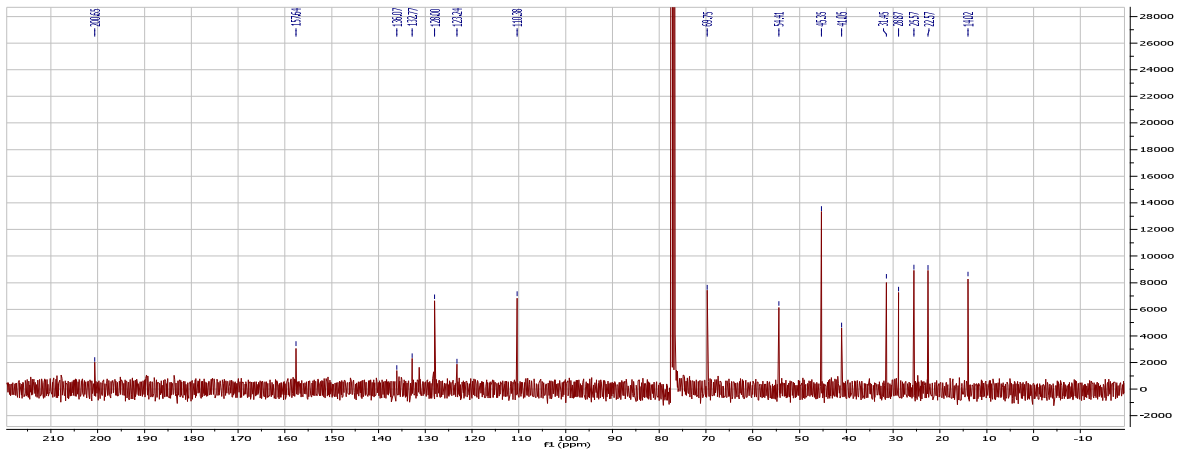

(1) ELSD Signal 9.402  
Range: 9.394

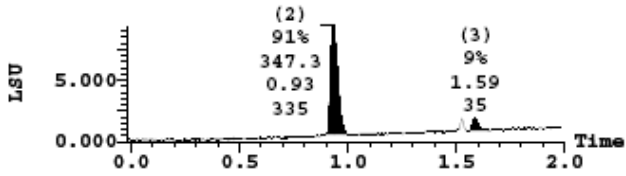

| Peak ID | Compound | Time | Mass Found |
|---------|----------|------|------------|
| 2       | Found    | 0.95 | 347.29     |

2: (Time: 0.95) 1:MS ES+  
1.1e+08

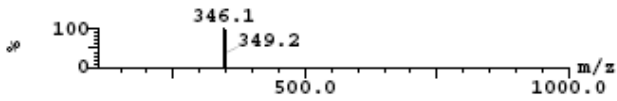



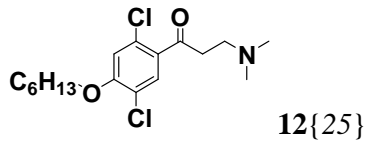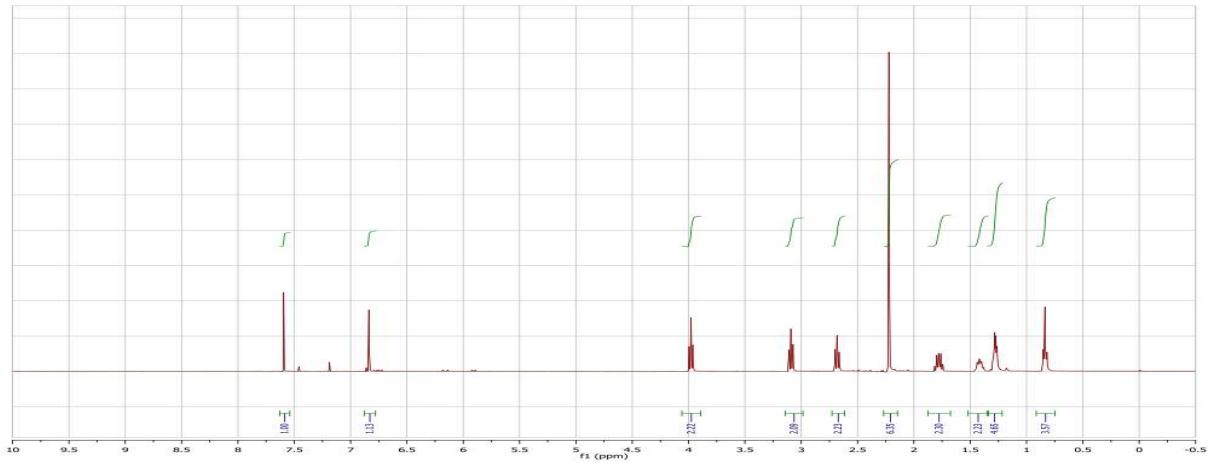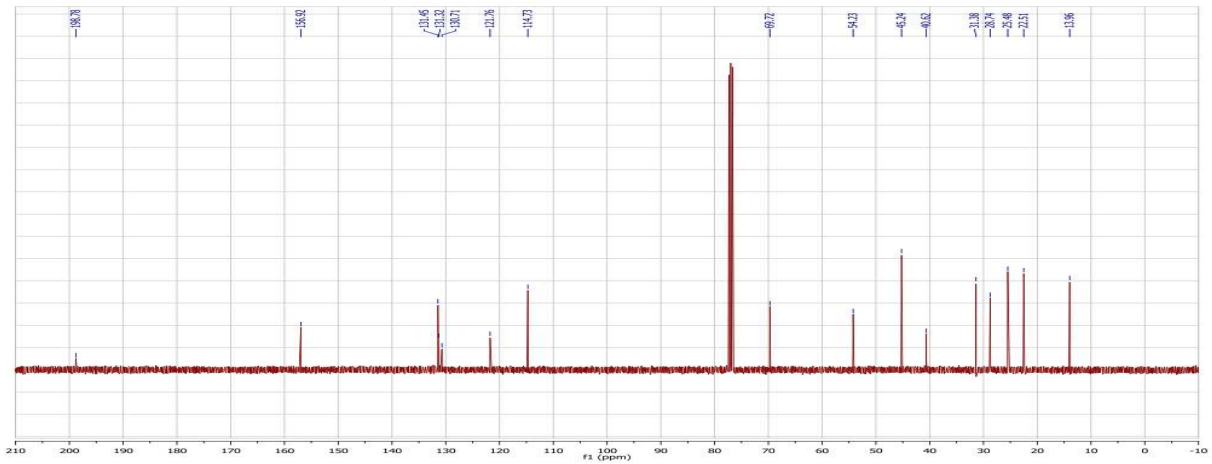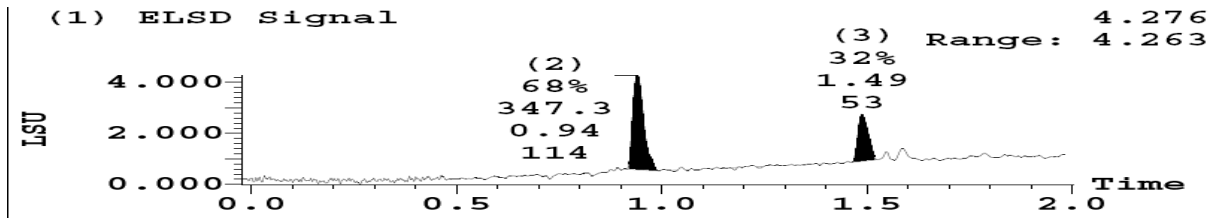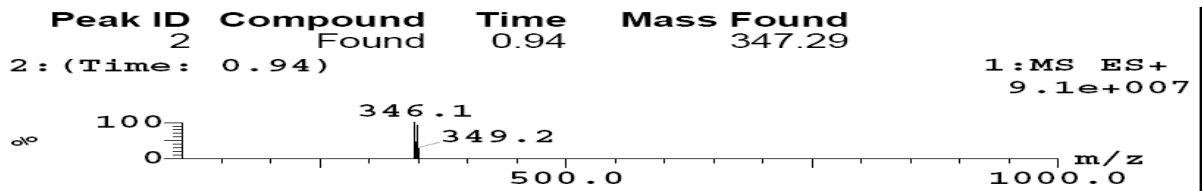

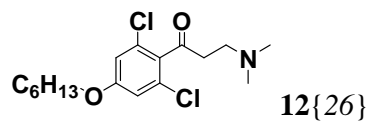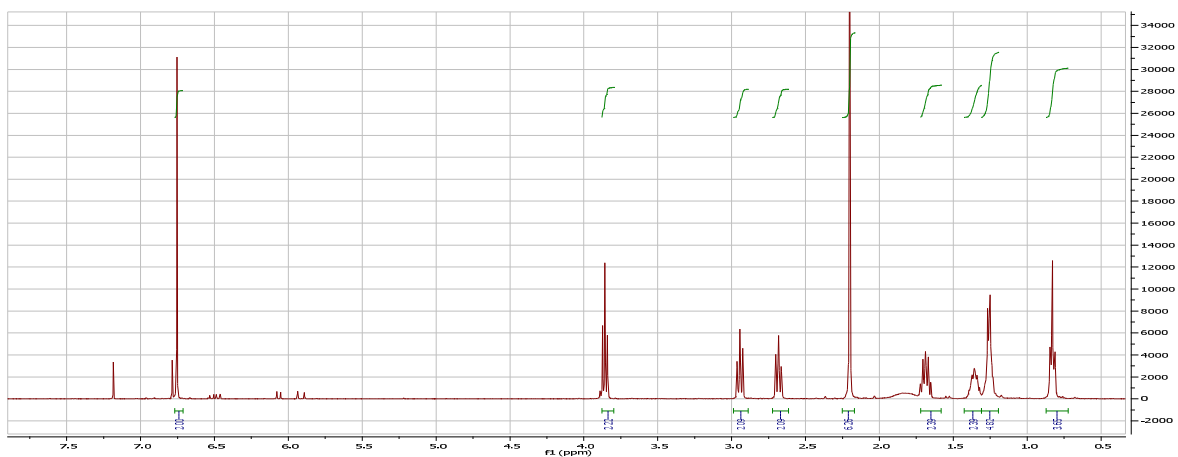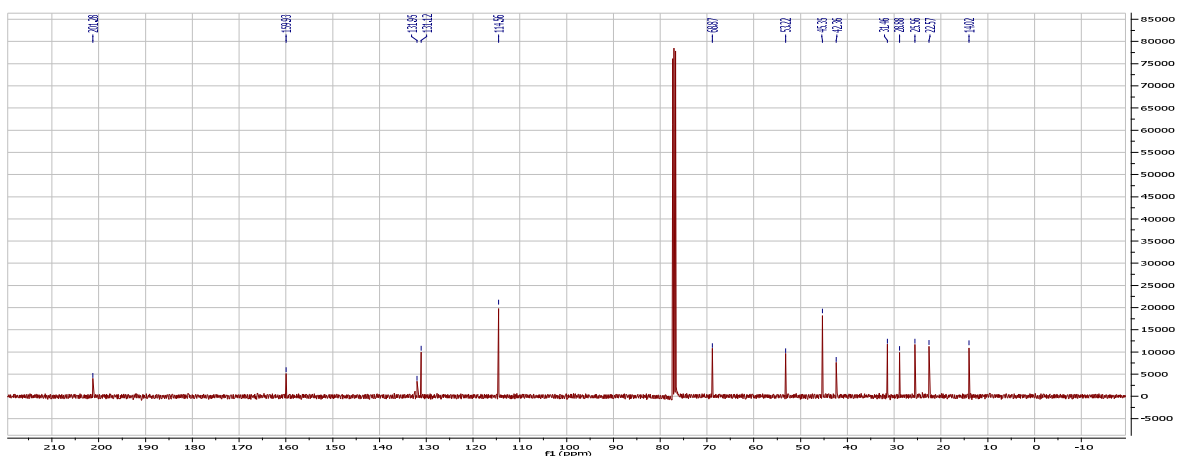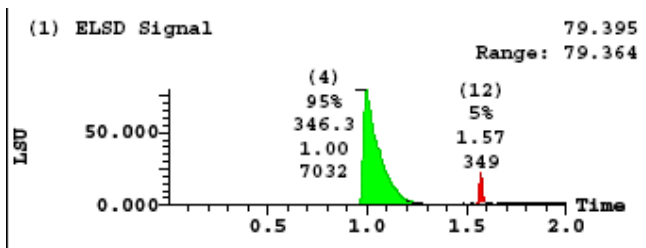

| Peak ID | Compound Found | Time | Mass Found |
|---------|----------------|------|------------|
| 4       | Found          | 0.97 | 346.30     |

4: (Time: 0.97) 1:MS ES+  
3.5e+007

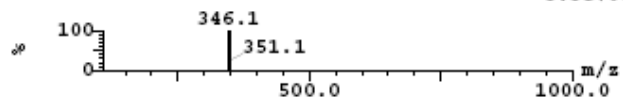

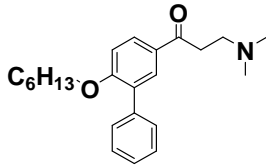

12{27}

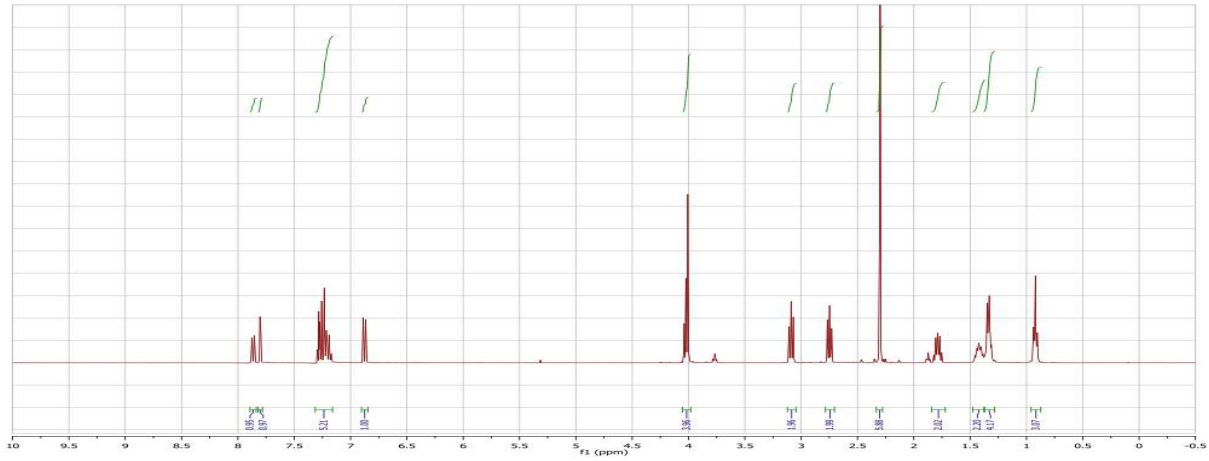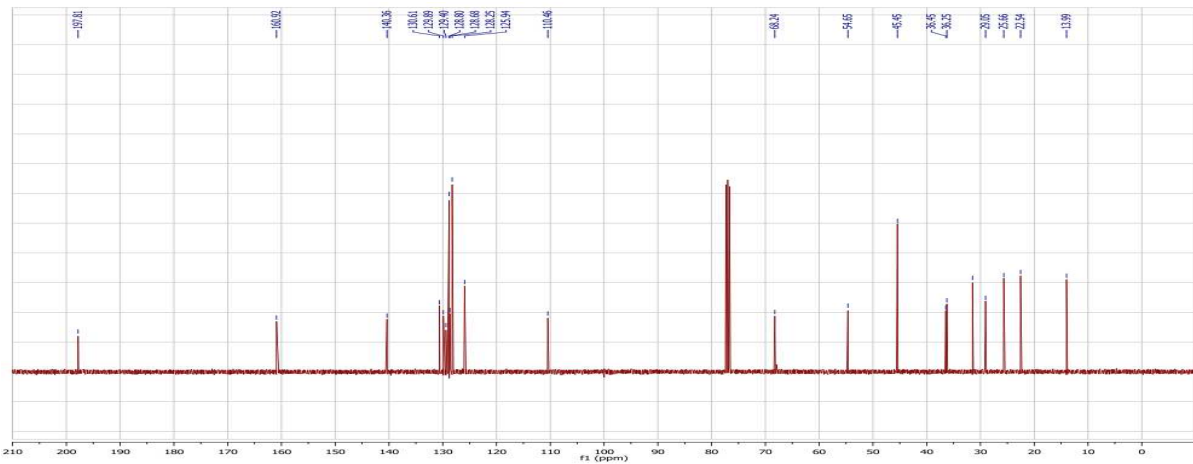

(1) ELSD Signal

7.467  
Range: 7.421

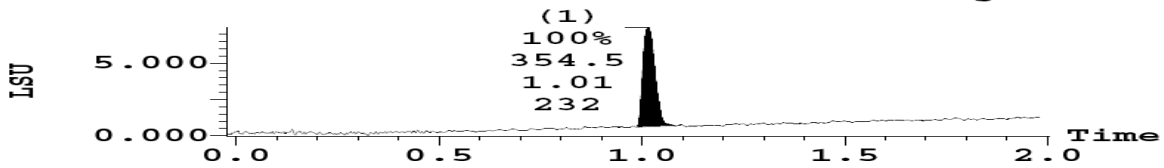

| Peak ID | Compound | Time | Mass Found |
|---------|----------|------|------------|
| 1       | Found    | 1.02 | 354.50     |

1: (Time: 1.02)

1:MS ES+  
8.6e+007

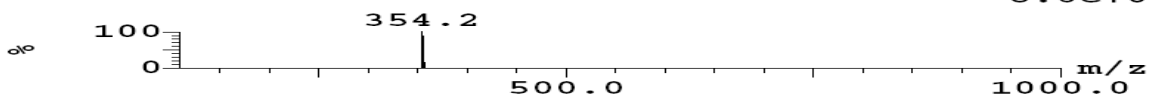

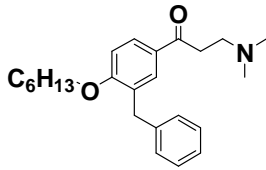

12{28}

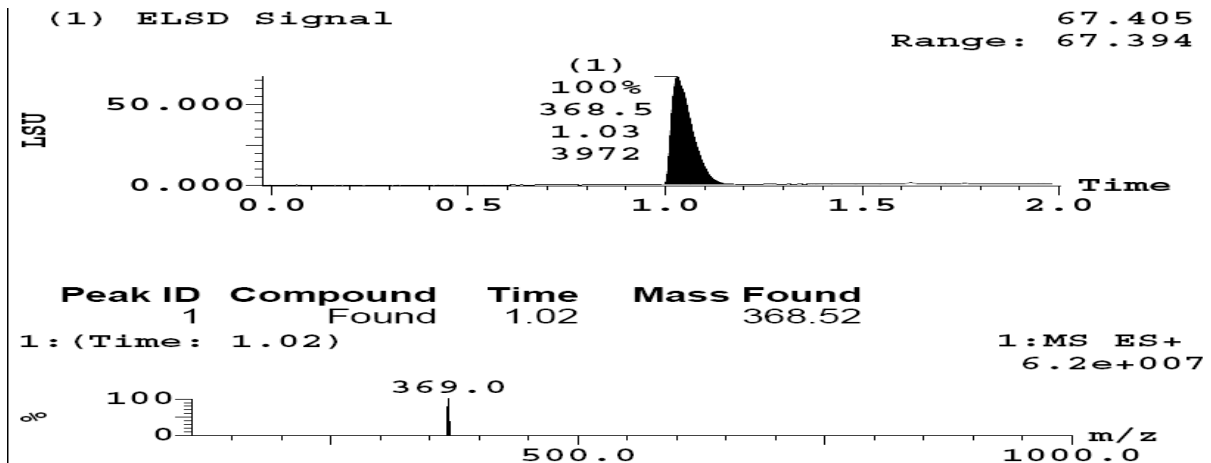

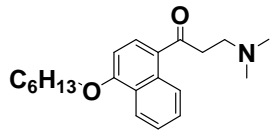

13{1}

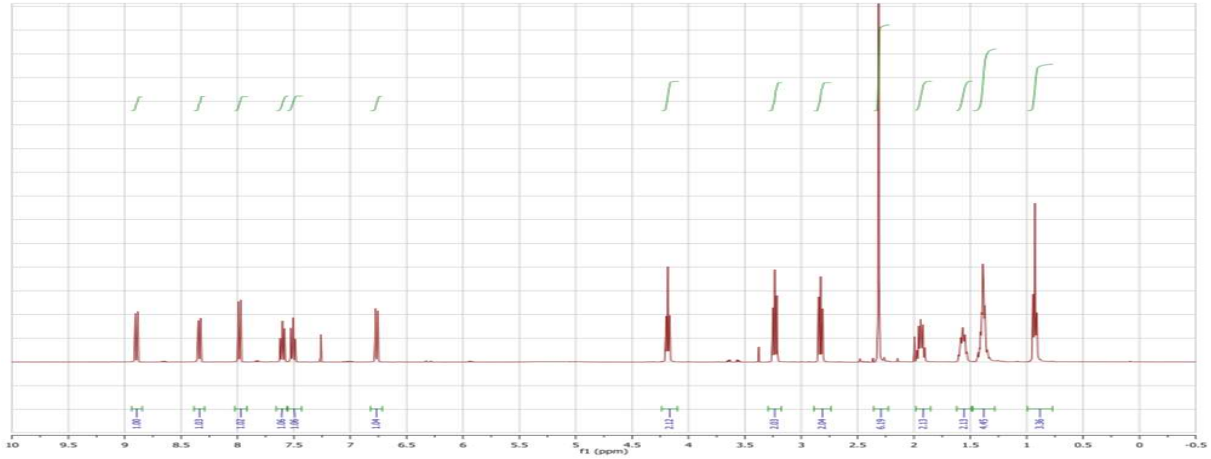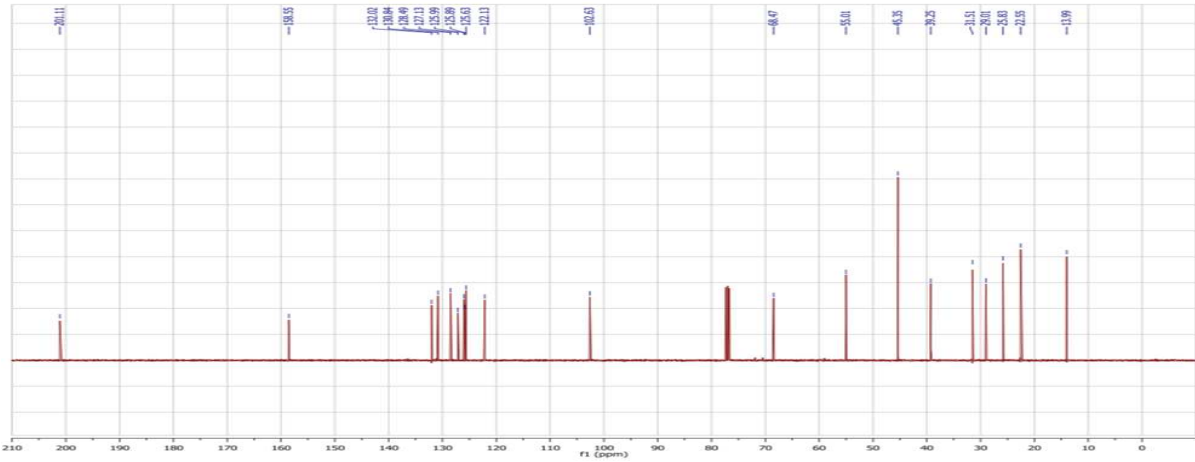

(1) ELSD Signal

41.771  
Range: 41.765

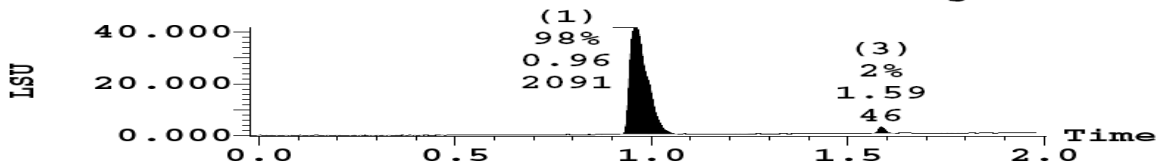

| Peak ID | Compound Found | Time | Mass Found |
|---------|----------------|------|------------|
| 2       | Found          | 1.01 | 328.46     |

1:MS ES+  
1.3e+008

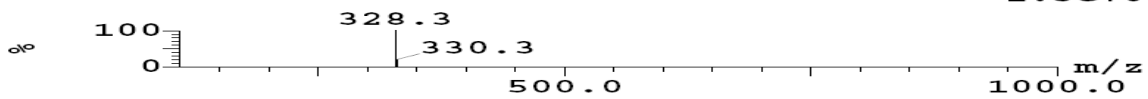

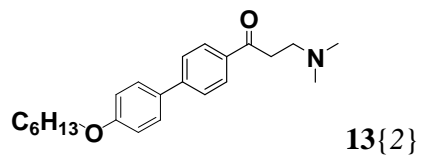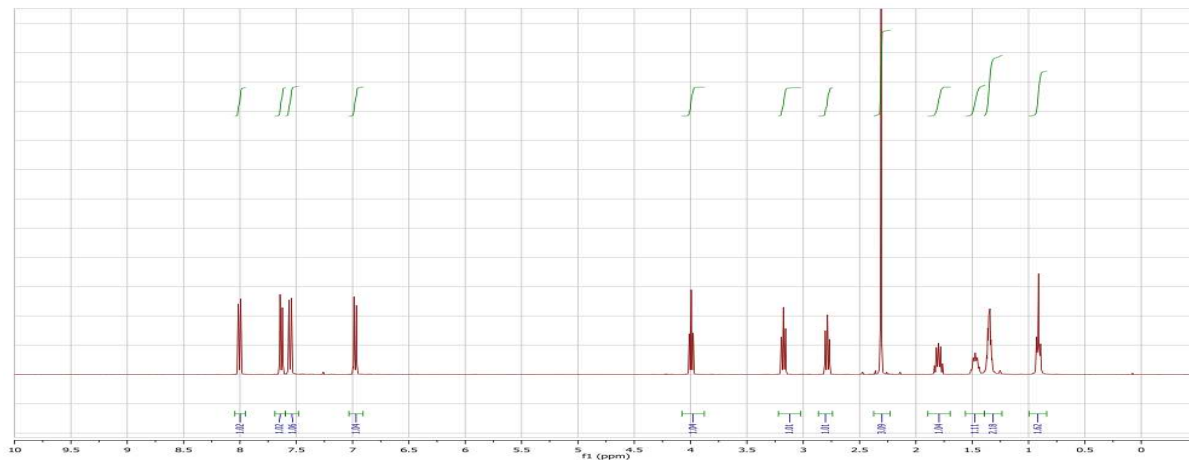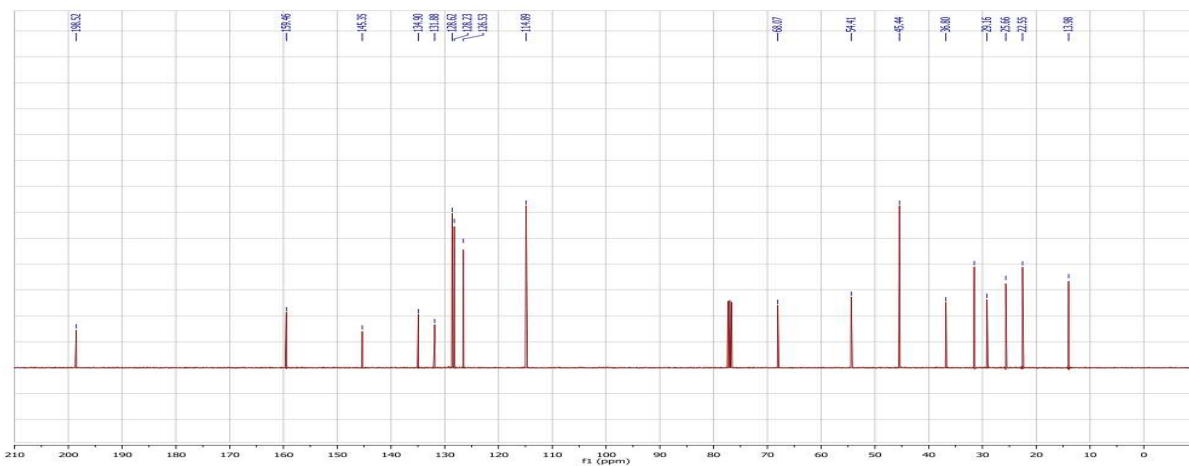

(1) ELSD Signal

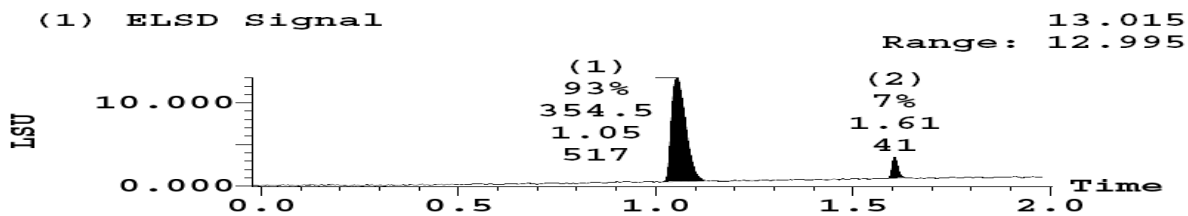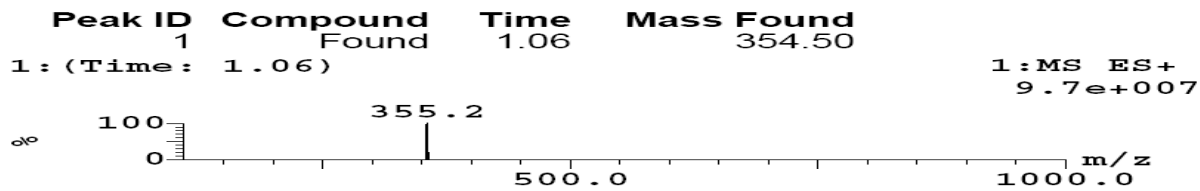

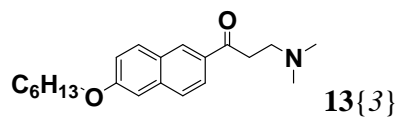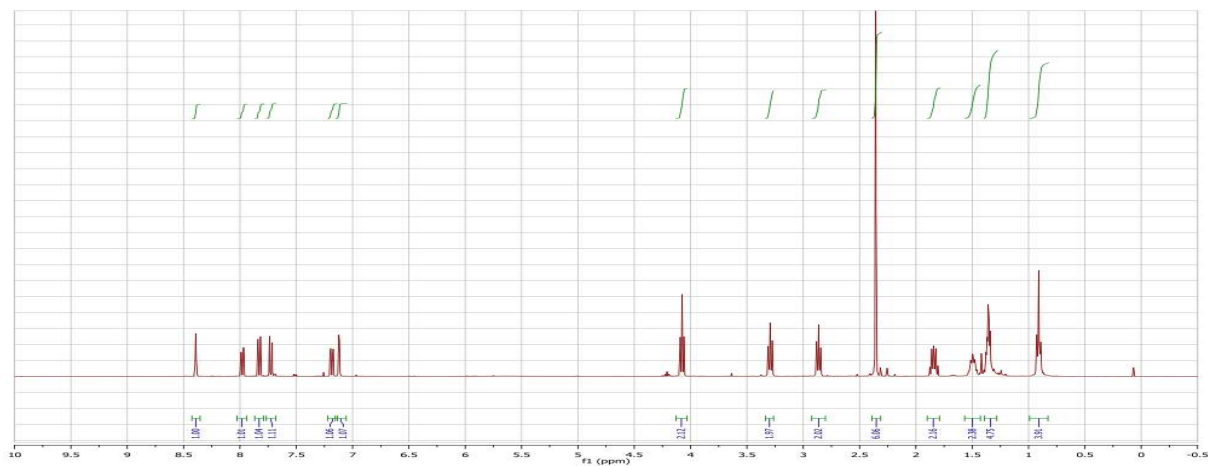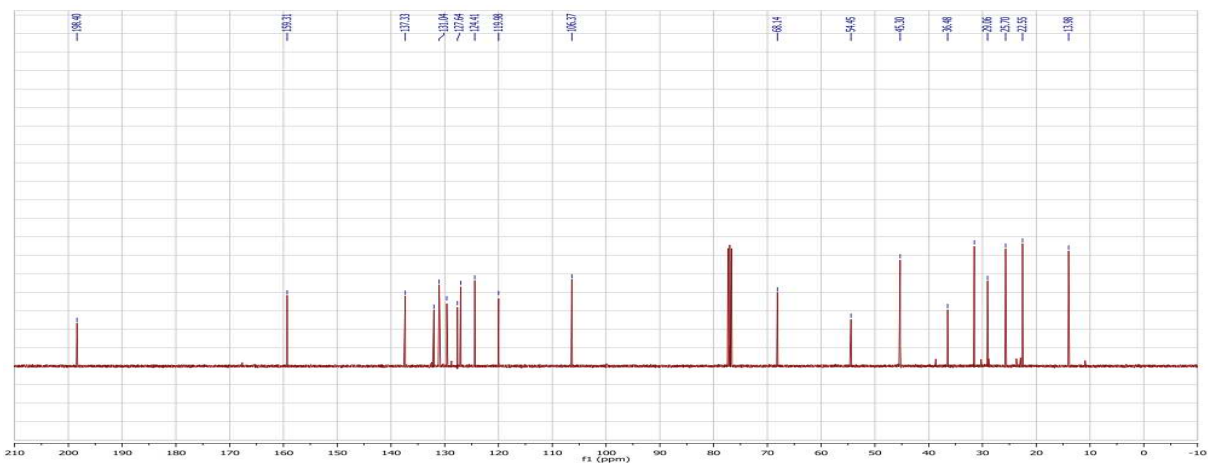

(1) ELSD Signal

Range: 14.935 14.990

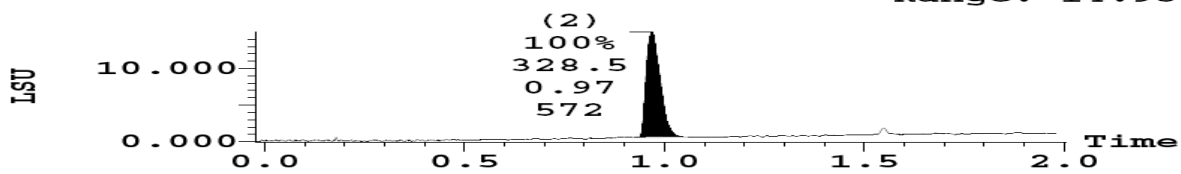

| Peak ID | Compound | Time | Mass Found |
|---------|----------|------|------------|
| 2       | Found    | 0.99 | 328.46     |

2: (Time: 0.99) 1:MS ES+ 1.3e+008

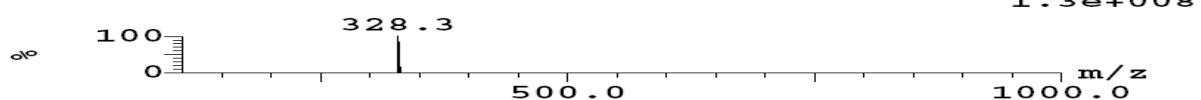

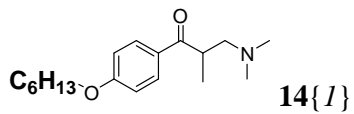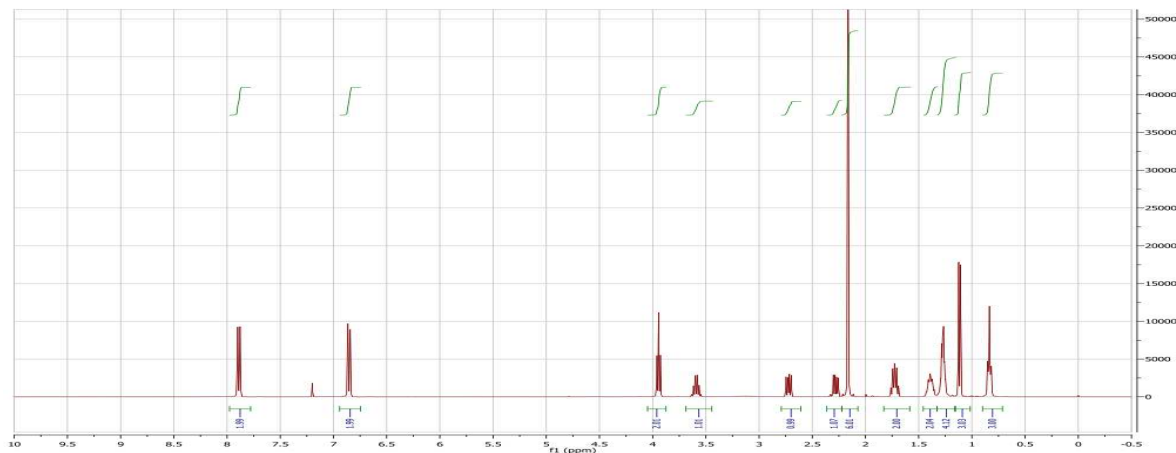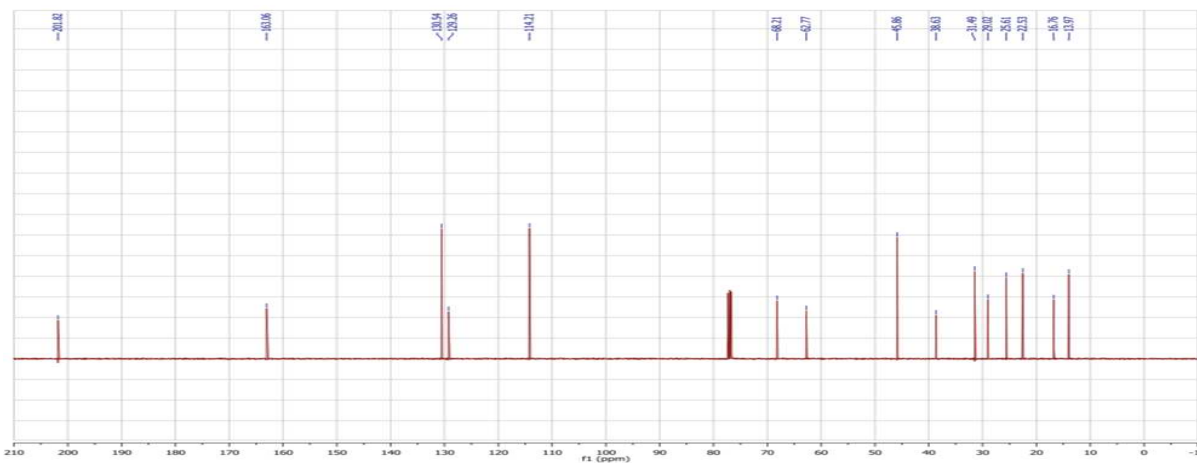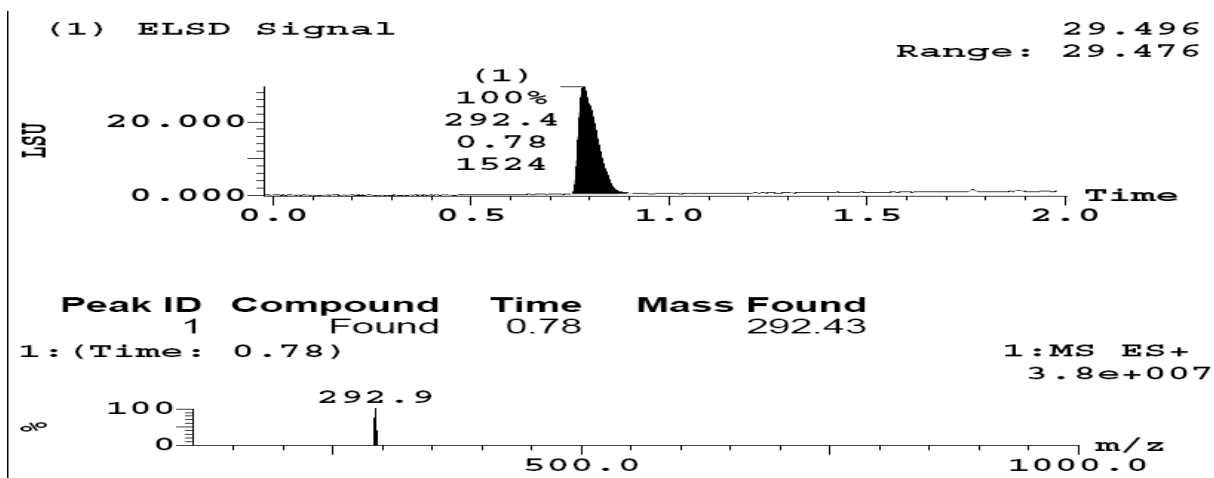



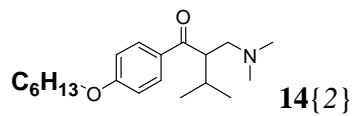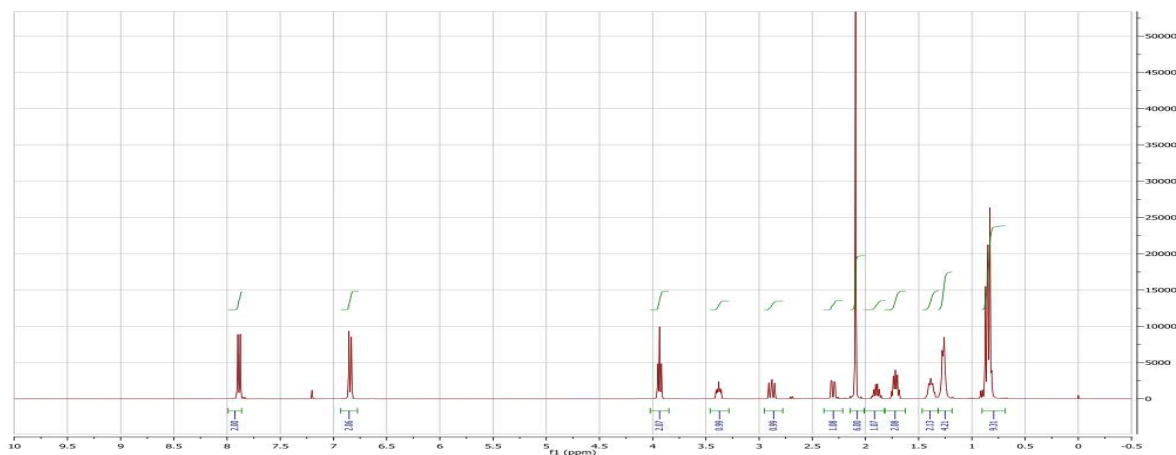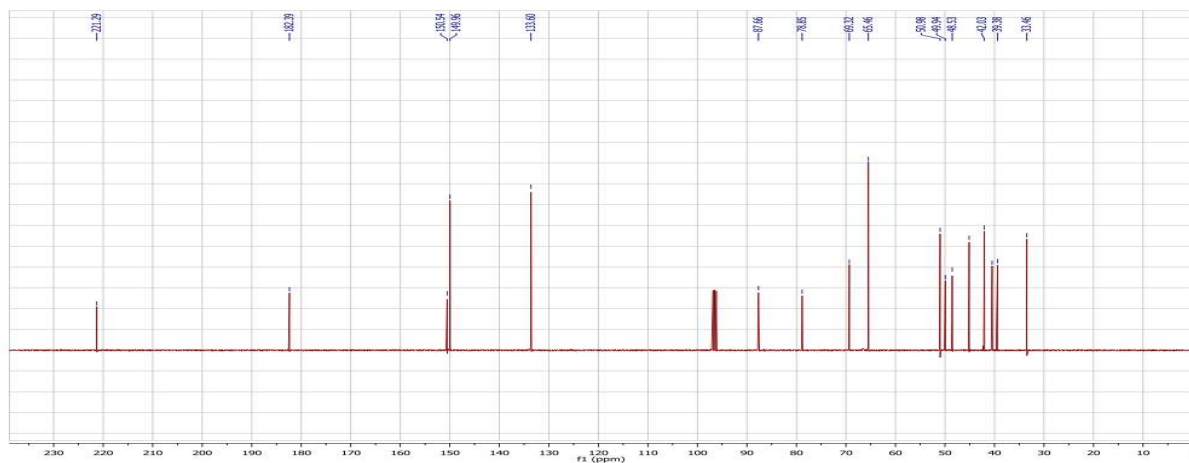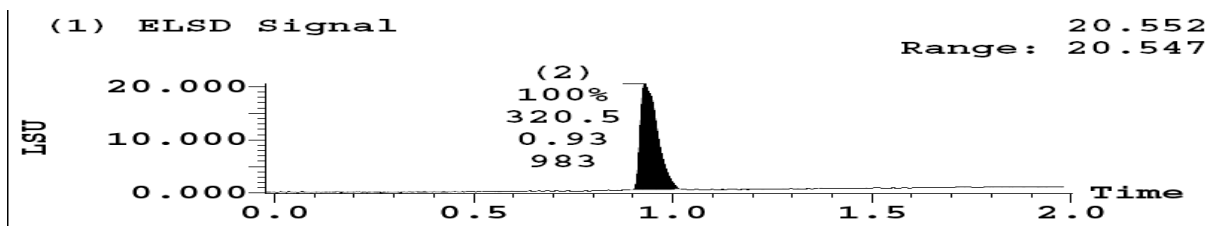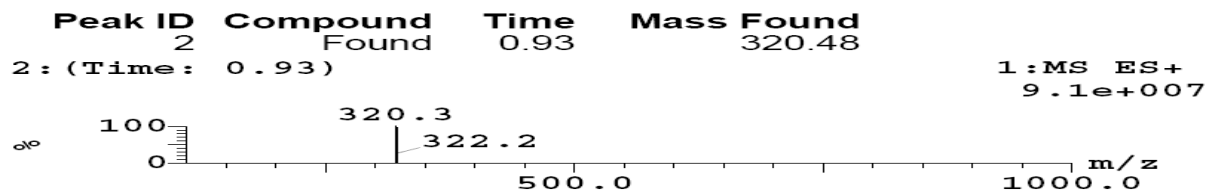

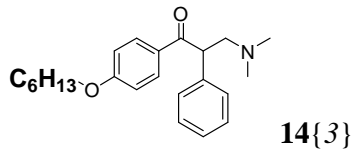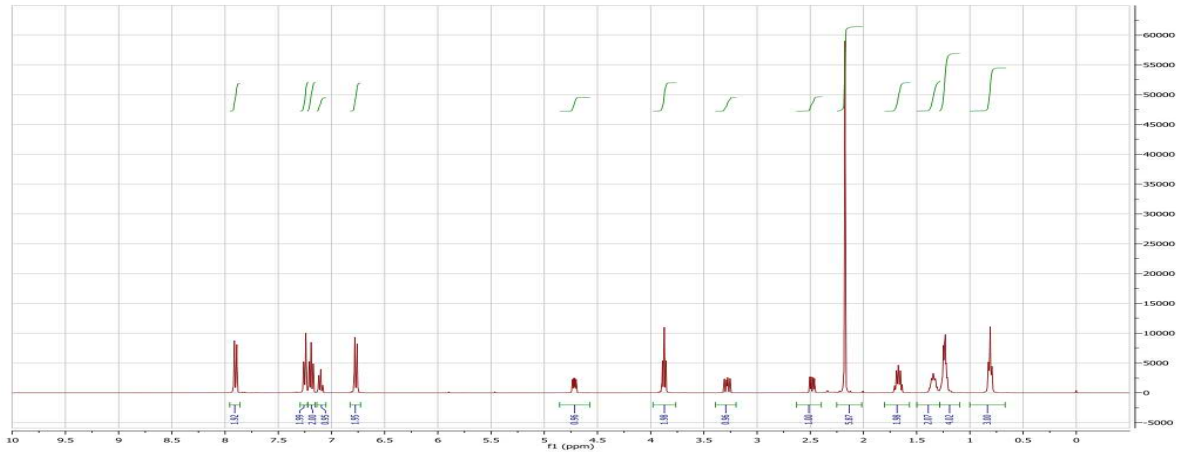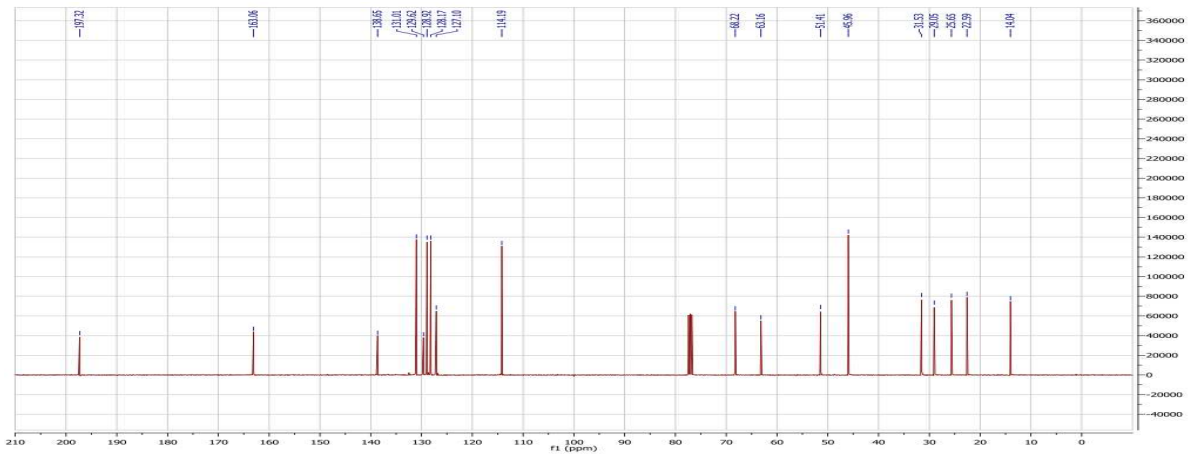

(1) ELSD Signal

96.190  
Range: 96.175

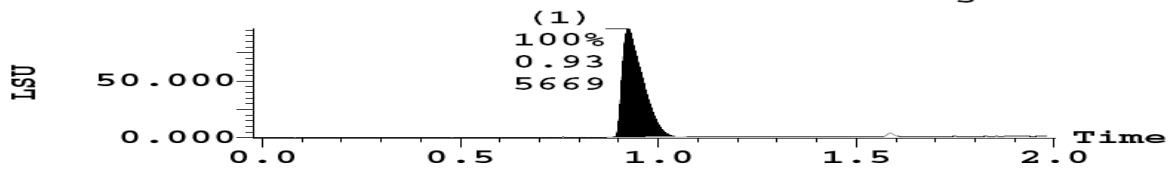

| Peak ID | Compound Found | Time | Mass Found |
|---------|----------------|------|------------|
| 2       |                | 1.01 | 354.50     |

1:MS ES+  
1.3e+008

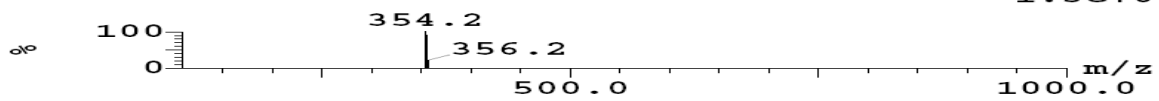

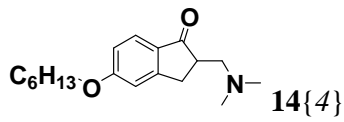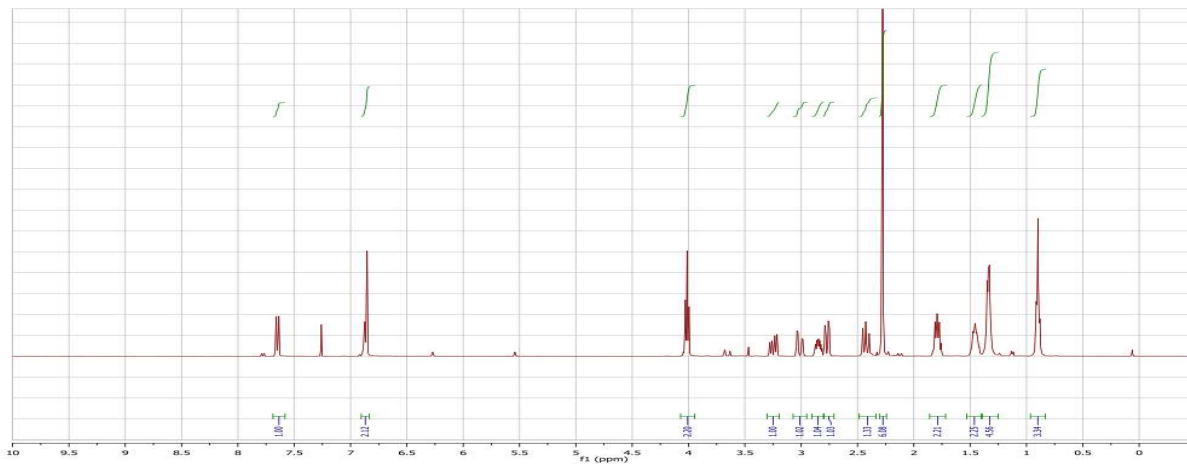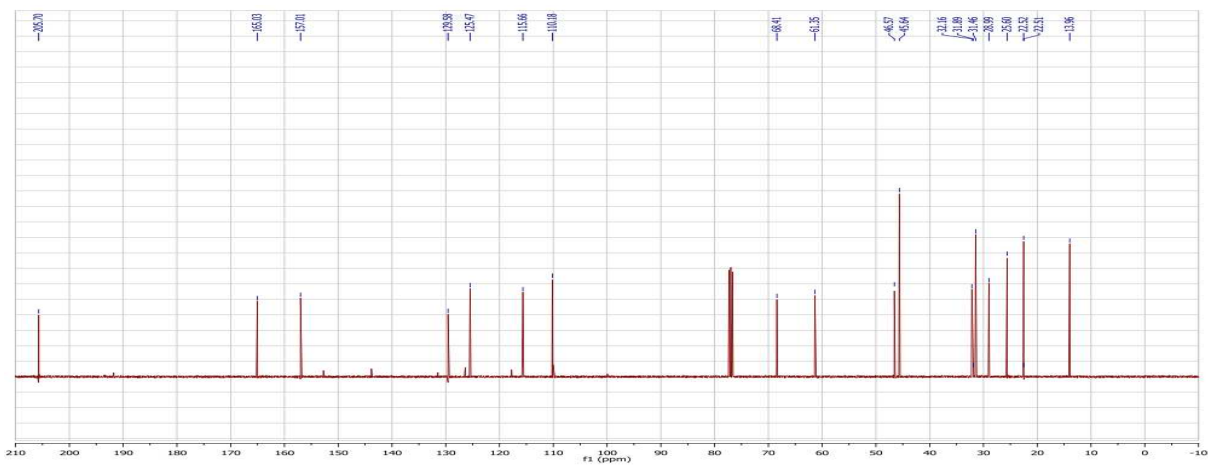

(1) ELSD Signal

42.401  
Range: 42.382

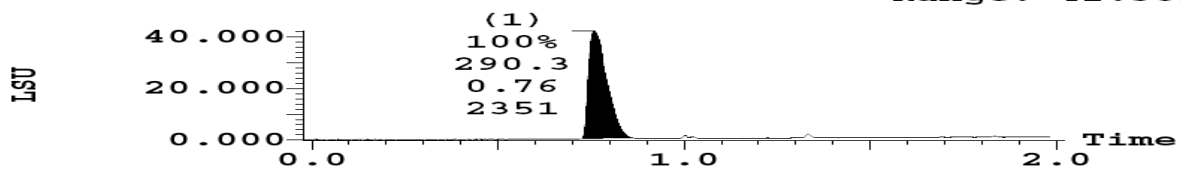

| Peak ID | Compound | Time | Mass Found |
|---------|----------|------|------------|
| 1       | Found    | 0.76 | 290.31     |

1: (Time: 0.76)

1:MS ES+  
1.0e+008

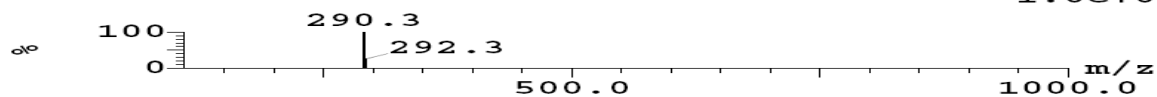

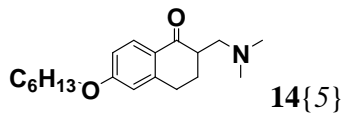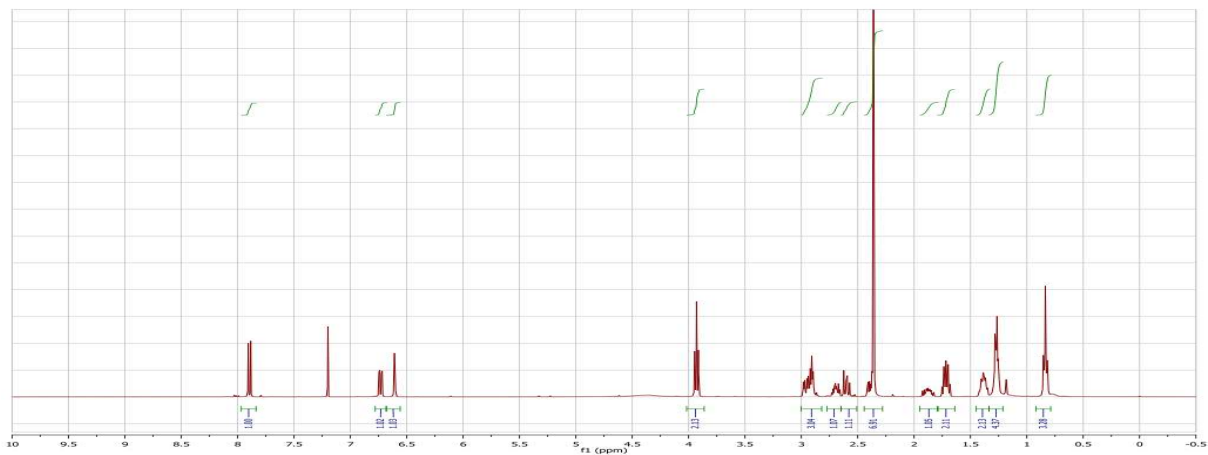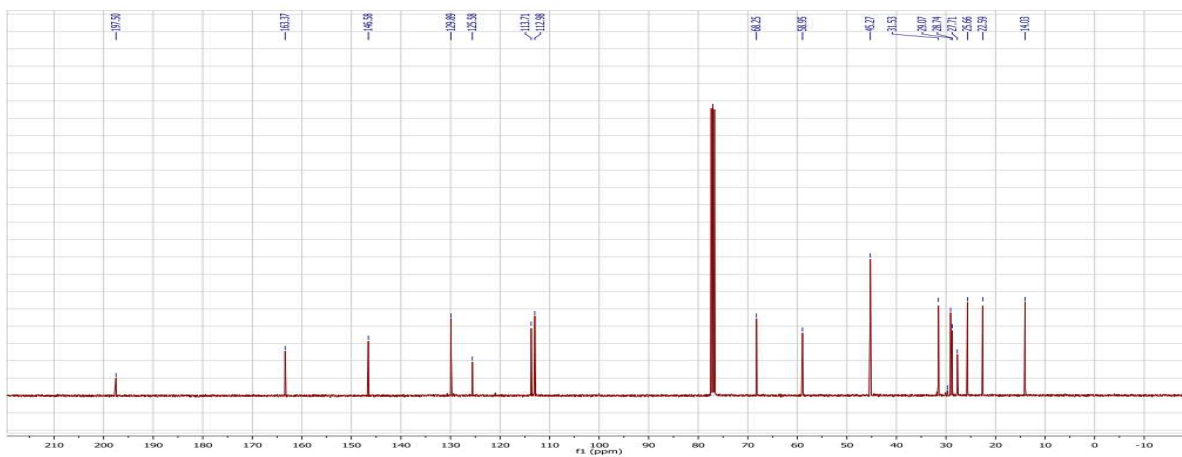

(1) ELSD Signal

17.695  
Range: 17.692

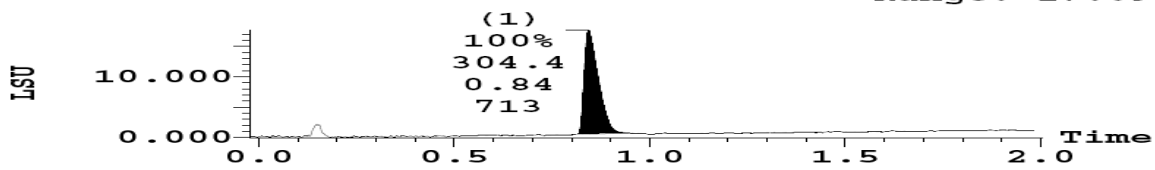

| Peak ID | Compound Found | Time | Mass Found |
|---------|----------------|------|------------|
| 1       |                | 0.85 | 304.44     |

1:MS ES+  
9.5e+007

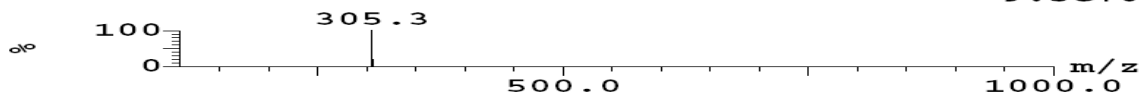

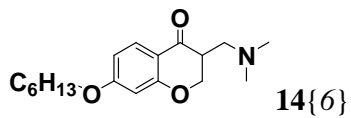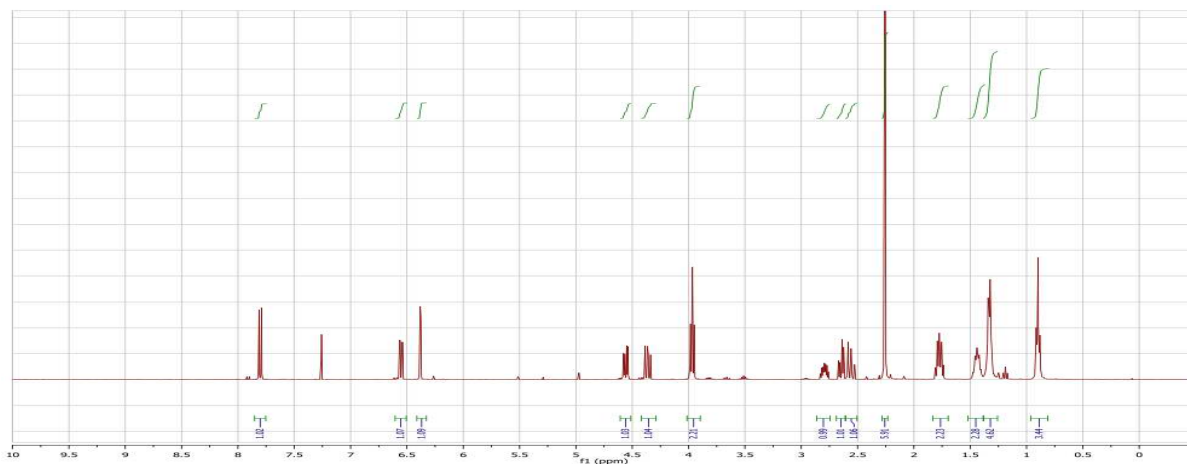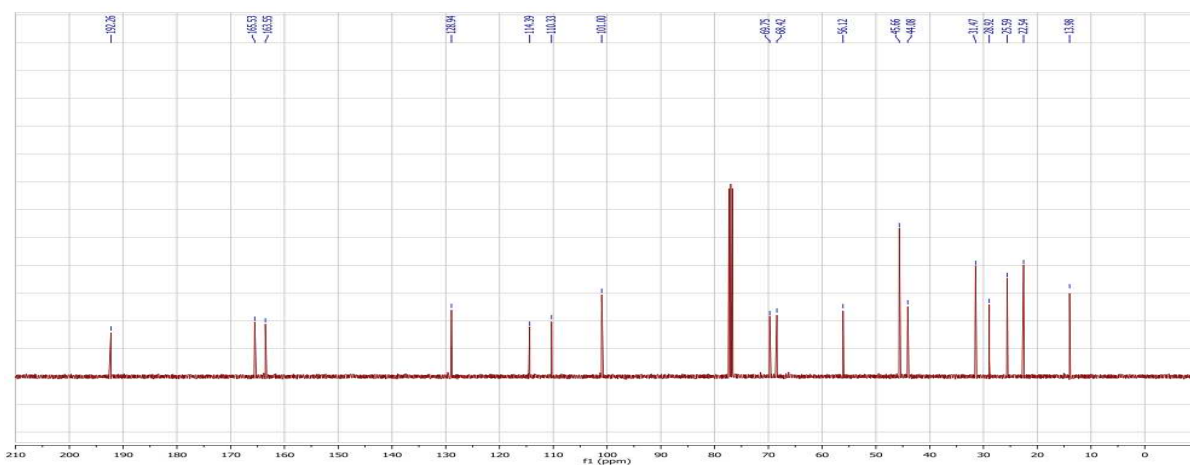

(1) ELSD Signal

11.436  
Range: 11.387

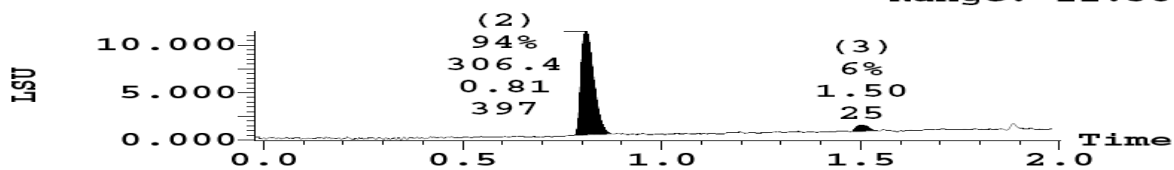

| Peak ID | Compound | Time | Mass Found |
|---------|----------|------|------------|
| 2       | Found    | 0.83 | 306.41     |

1:MS ES+  
1.2e+008

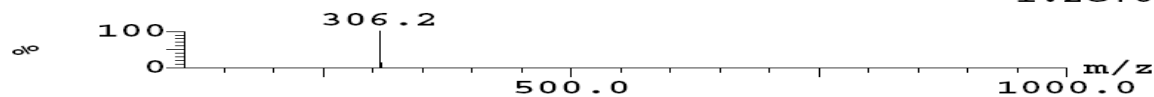

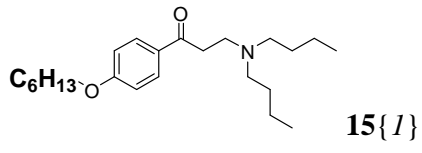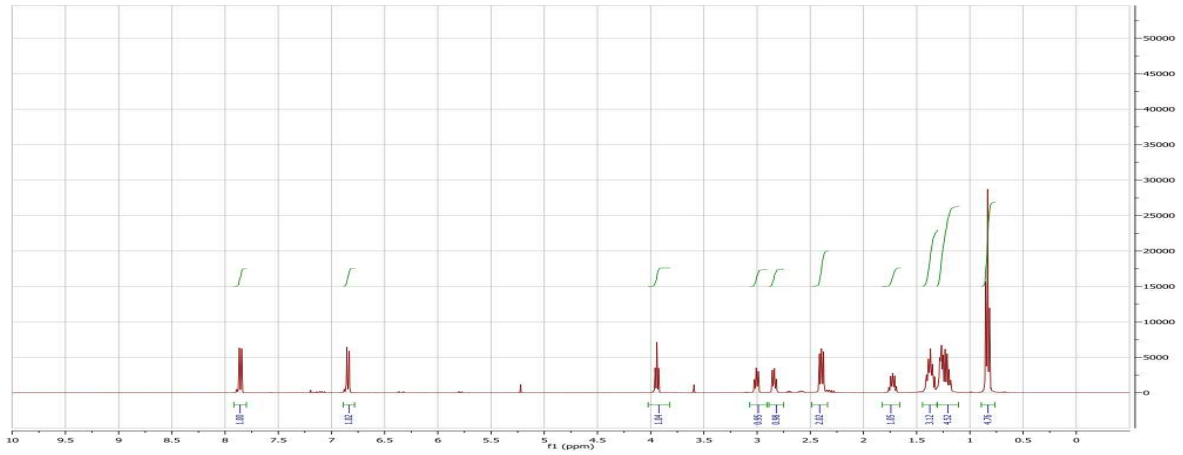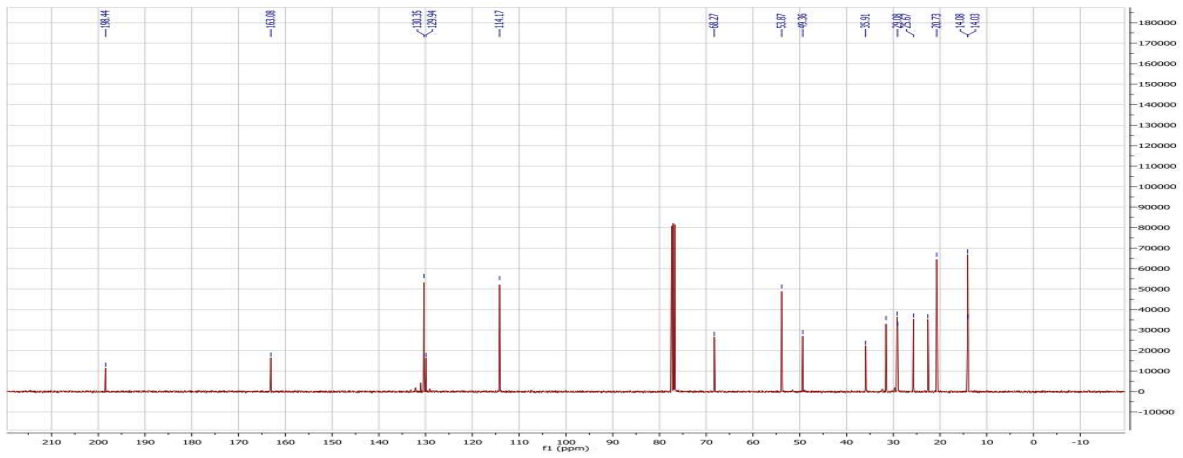

(1) ELSD Signal

15.432  
Range: 15.419

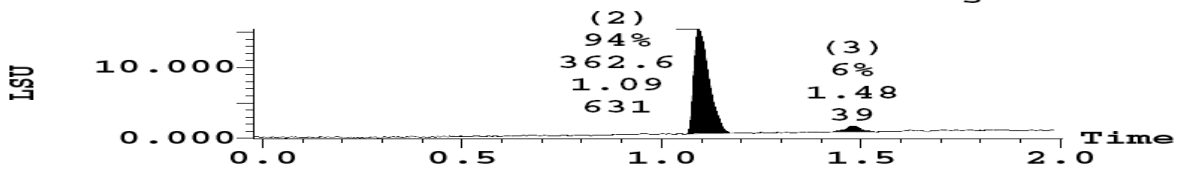

| Peak ID | Compound Found | Time | Mass Found |
|---------|----------------|------|------------|
| 2       | Found          | 1.10 | 362.56     |

2: (Time: 1.10) 1: MS ES+ 1.2e+008

Mass spectrum showing relative intensity (%) vs m/z. Major peak at 362.3 and minor peak at 364.3.

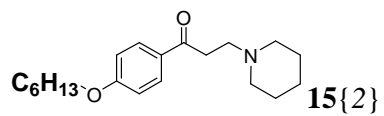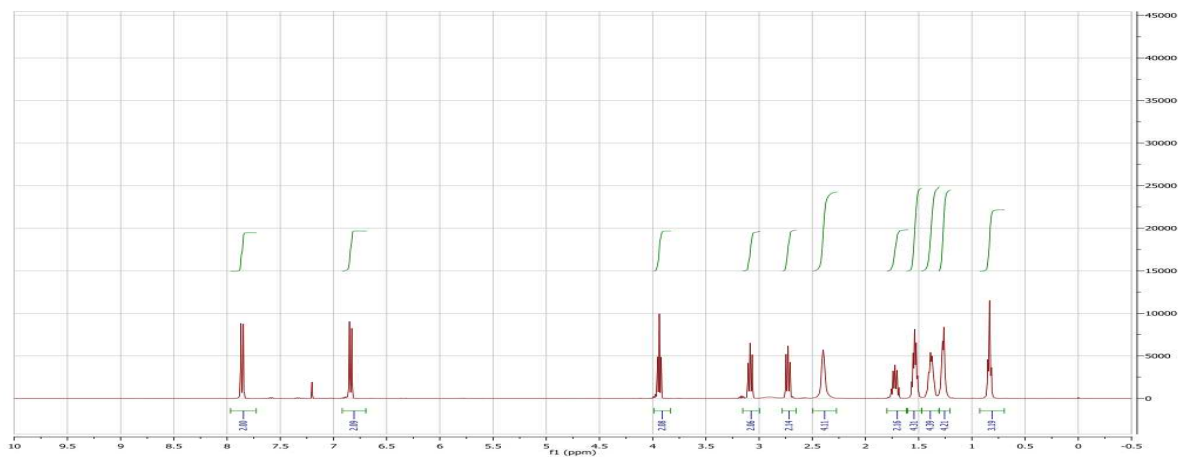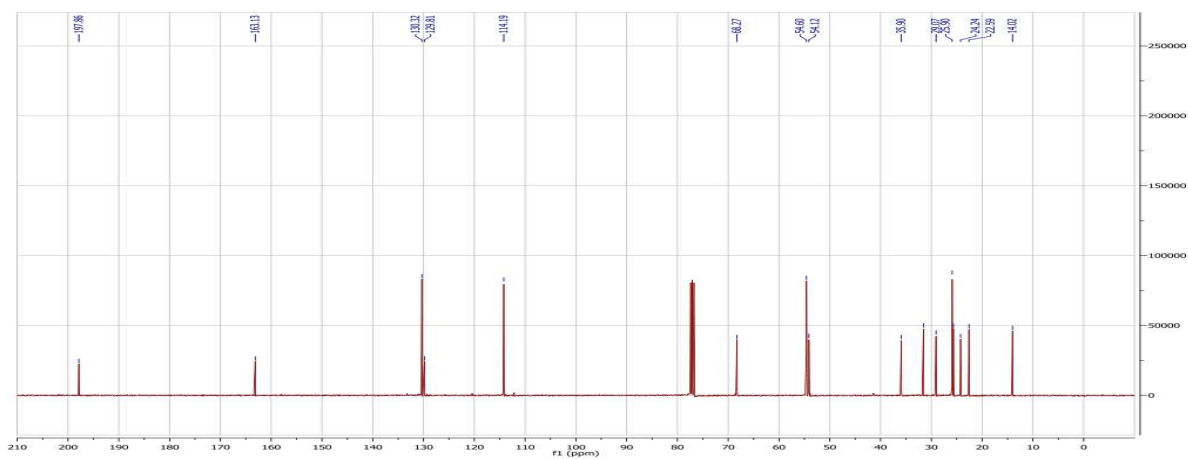

(1) ELSD Signal

71.677  
Range: 71.600

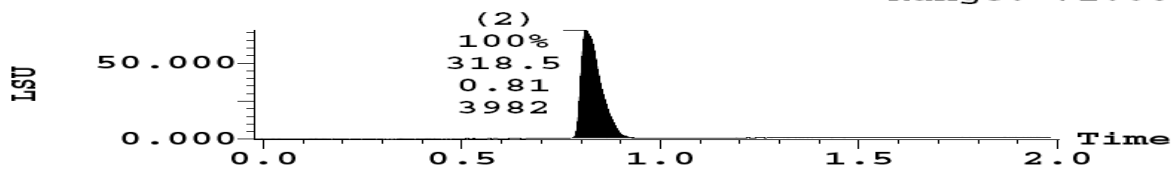

(2)  
 100%  
 318.5  
 0.81  
 3982

| Peak ID | Compound Found | Time | Mass Found |
|---------|----------------|------|------------|
| 2       |                | 0.80 | 318.47     |

1: MS ES+  
8.4e+007

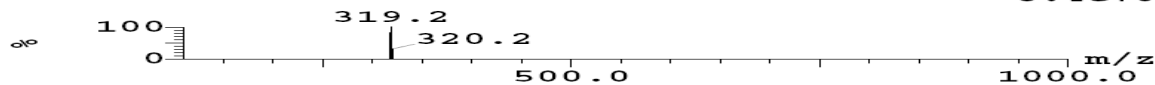

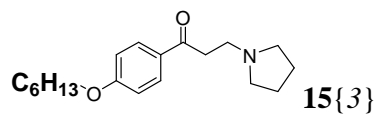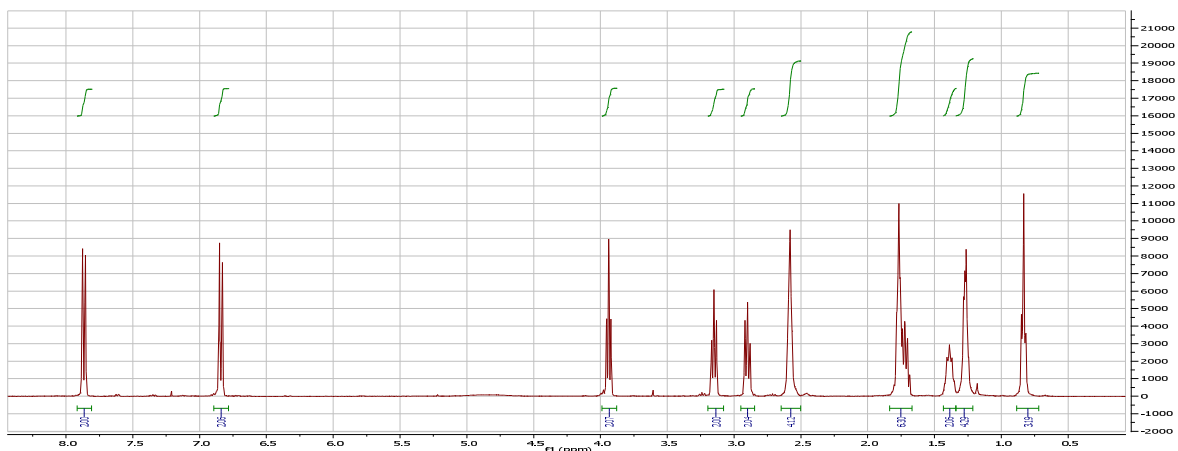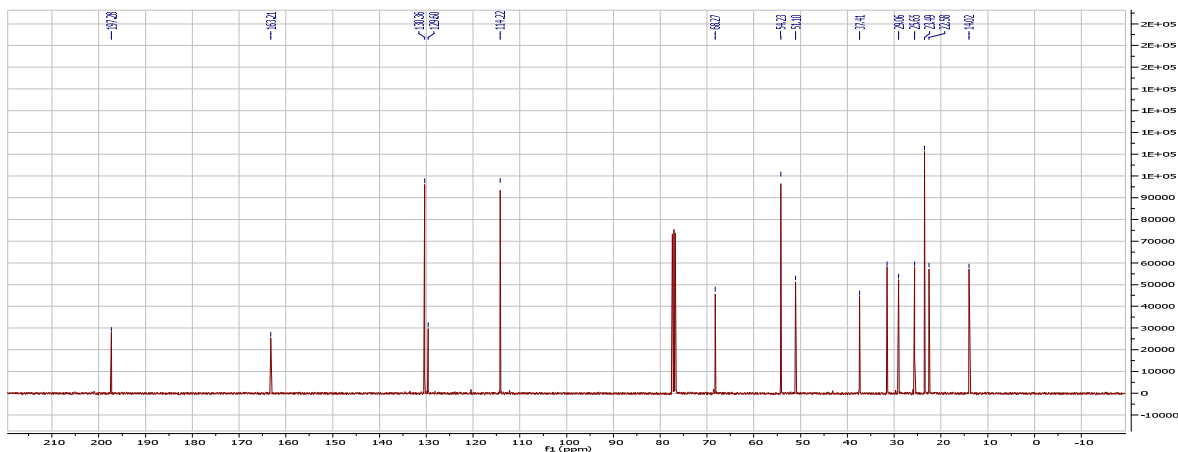

(1) ELSD Signal 47.509  
Range: 47.506

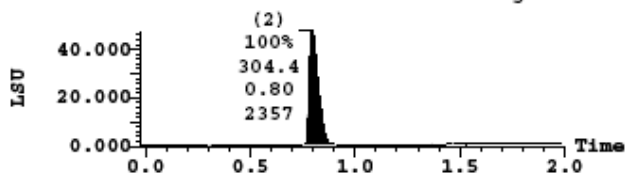

| Peak ID | Compound | Time | Mass Found |
|---------|----------|------|------------|
| 2       | Found    | 0.82 | 304.44     |

2: (Time: 0.82) 1:MS ES+  
1.3e+008

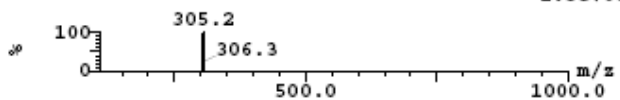



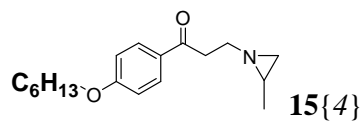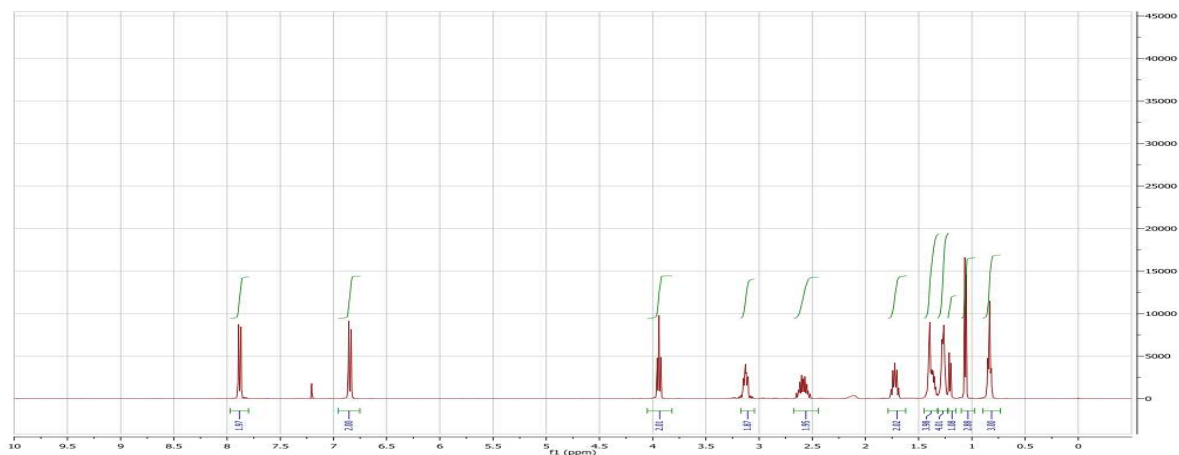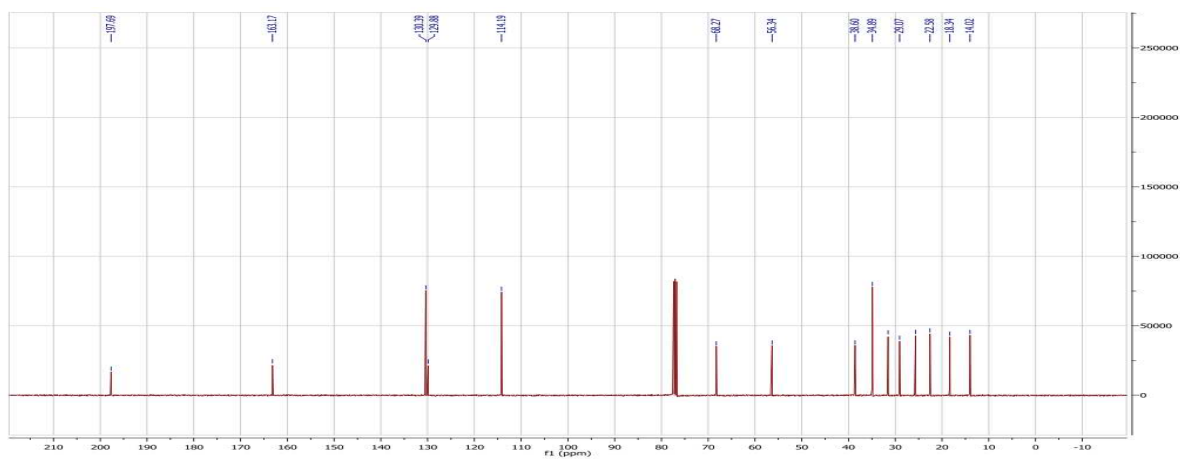

(1) ELSD Signal

70.510  
Range: 70.495

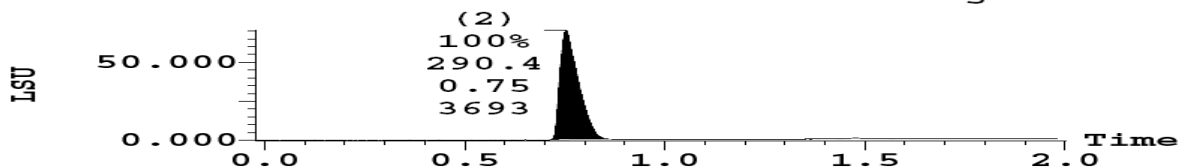

| Peak ID | Compound | Time | Mass Found |
|---------|----------|------|------------|
| 2       | Found    | 0.73 | 290.41     |

2: (Time: 0.73)

1: MS ES+  
6.9e+007

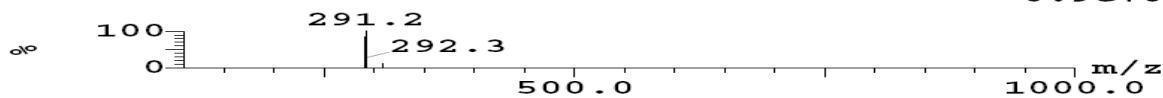

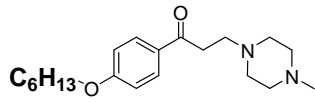

15{5}

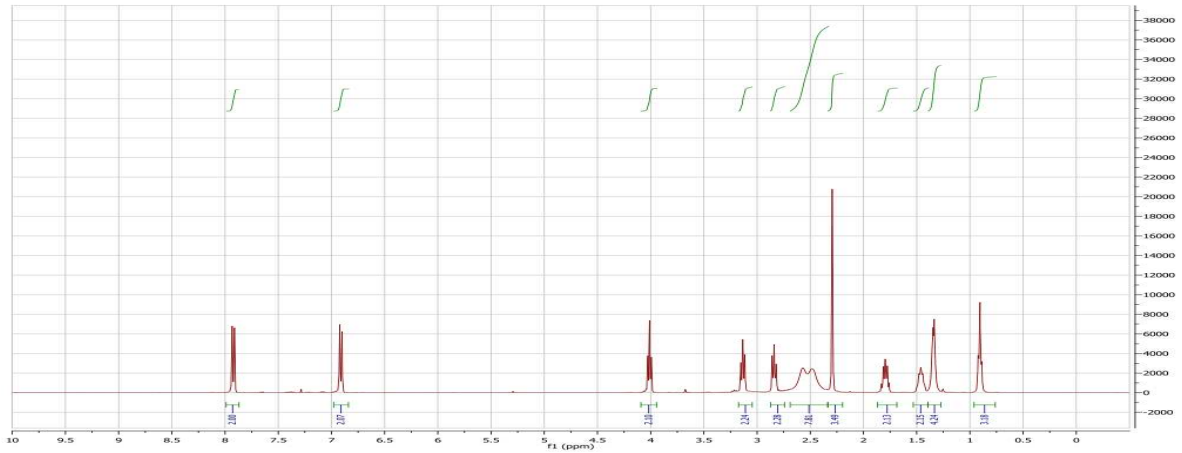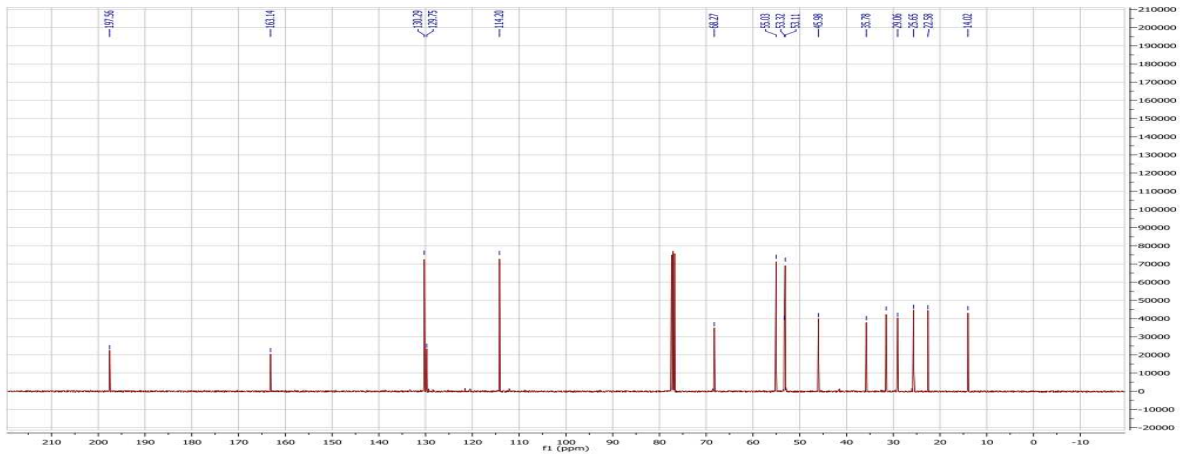

(1) ELSD Signal

72.854  
Range: 72.836

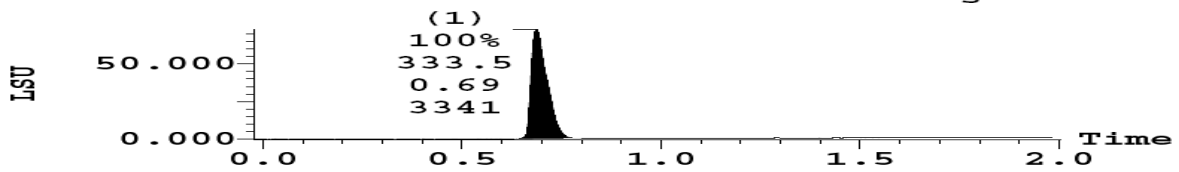

| Peak ID | Compound | Time | Mass Found |
|---------|----------|------|------------|
| 1       | Found    | 0.68 | 333.48     |

1:MS ES+  
9.0e+007

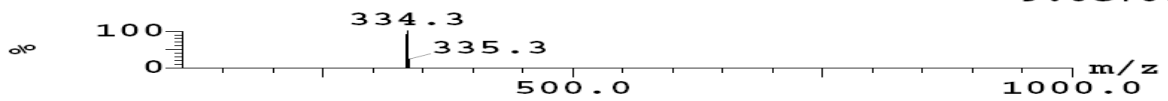

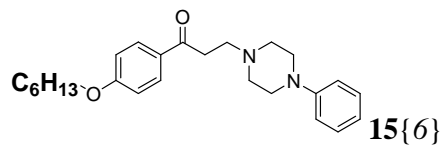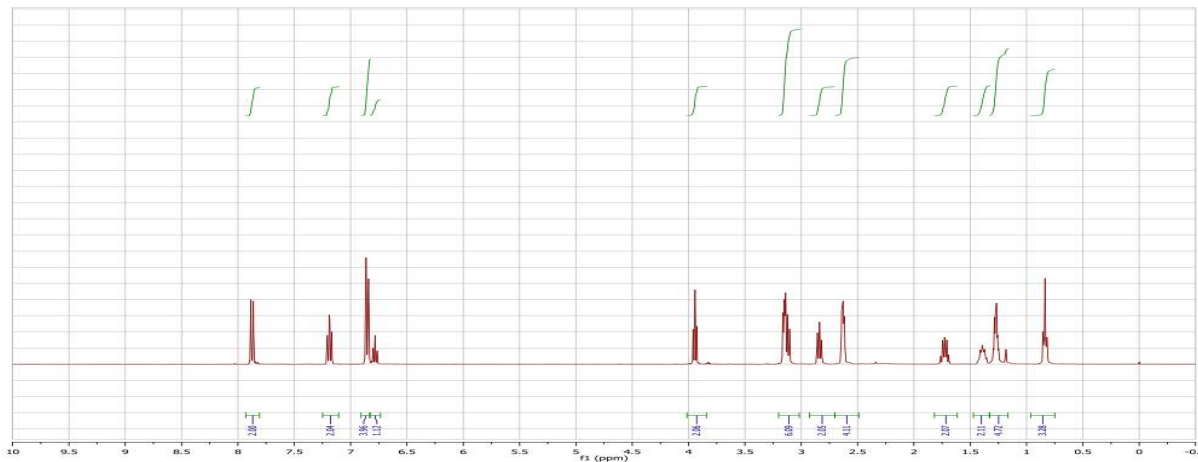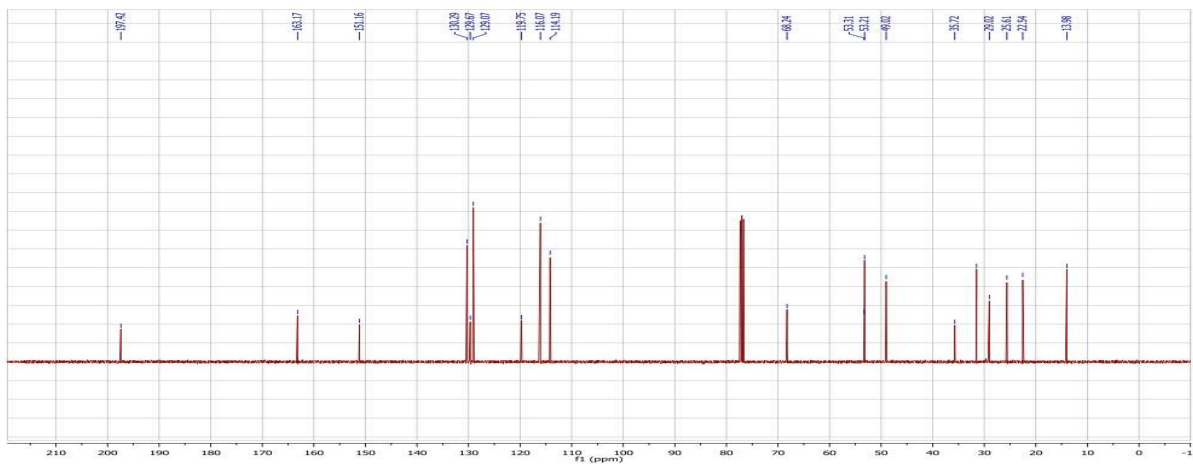

(1) ELSD Signal

30.863  
Range: 30.810

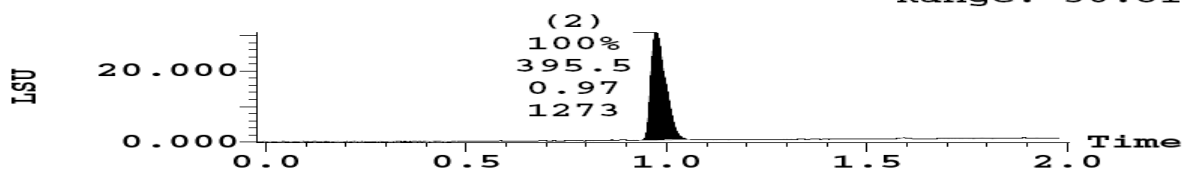

| Peak ID | Compound Found | Time | Mass Found |
|---------|----------------|------|------------|
| 2       | Found          | 0.97 | 395.55     |

1: MS ES+  
8.8e+007

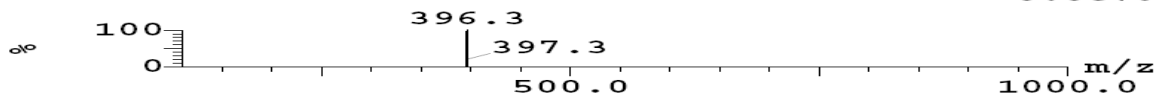

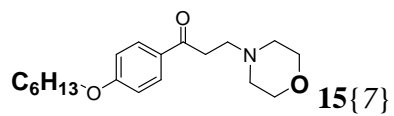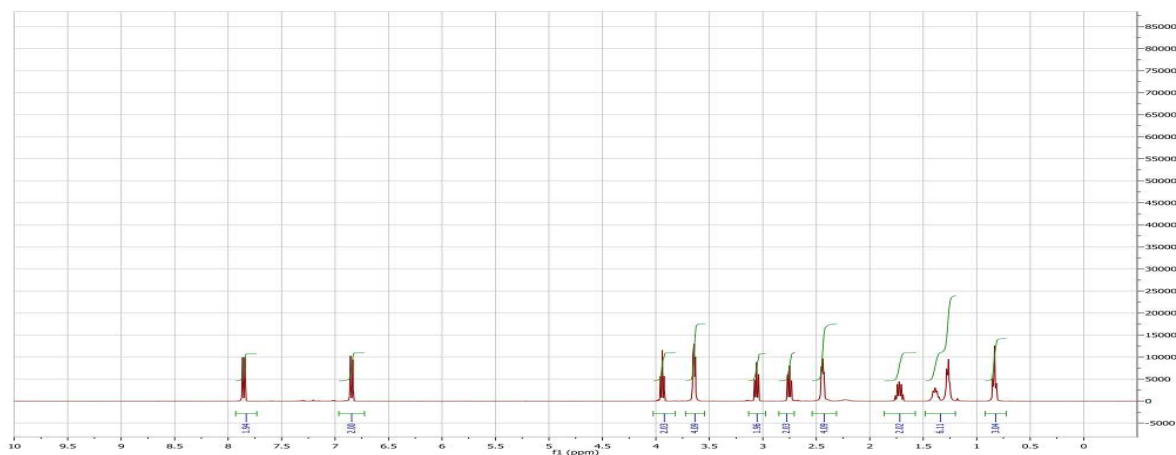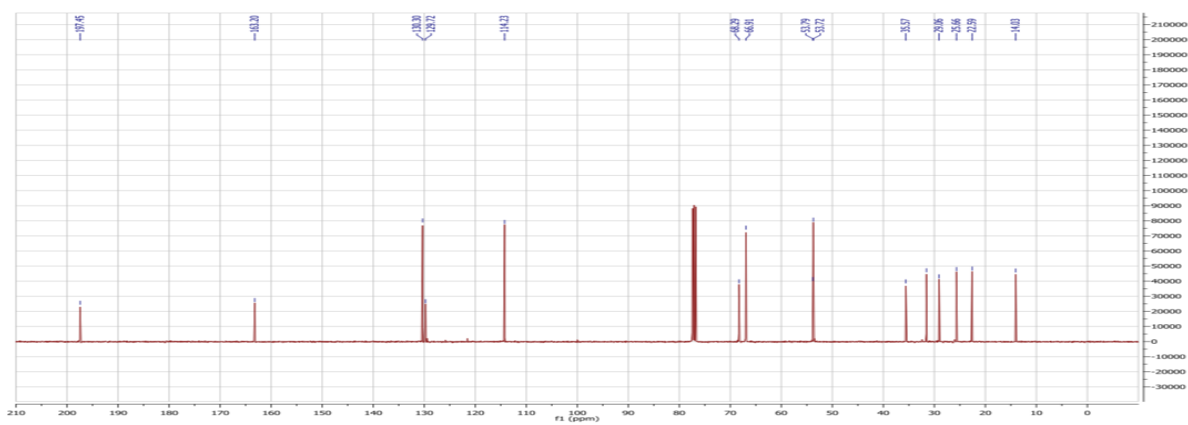

(1) ELSD Signal

Range: 74.545  
74.539

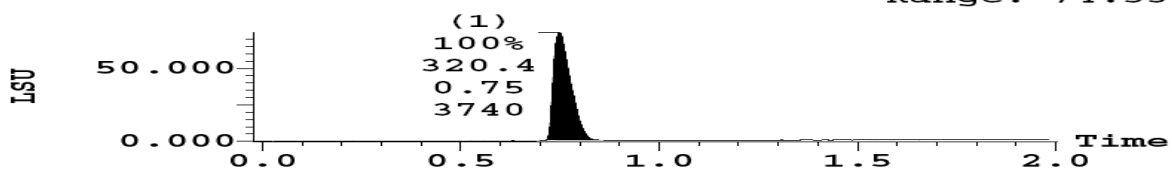

| Peak ID | Compound Found | Time | Mass Found |
|---------|----------------|------|------------|
| 1       | Found          | 0.73 | 320.44     |

1: MS ES+  
7.8e+007

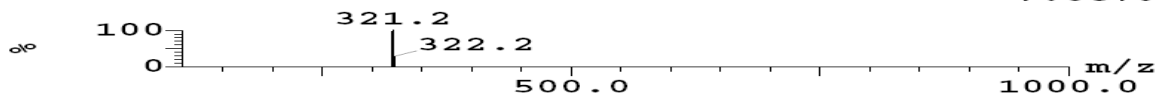

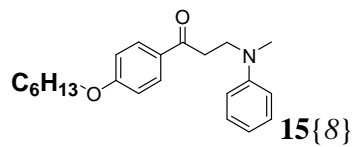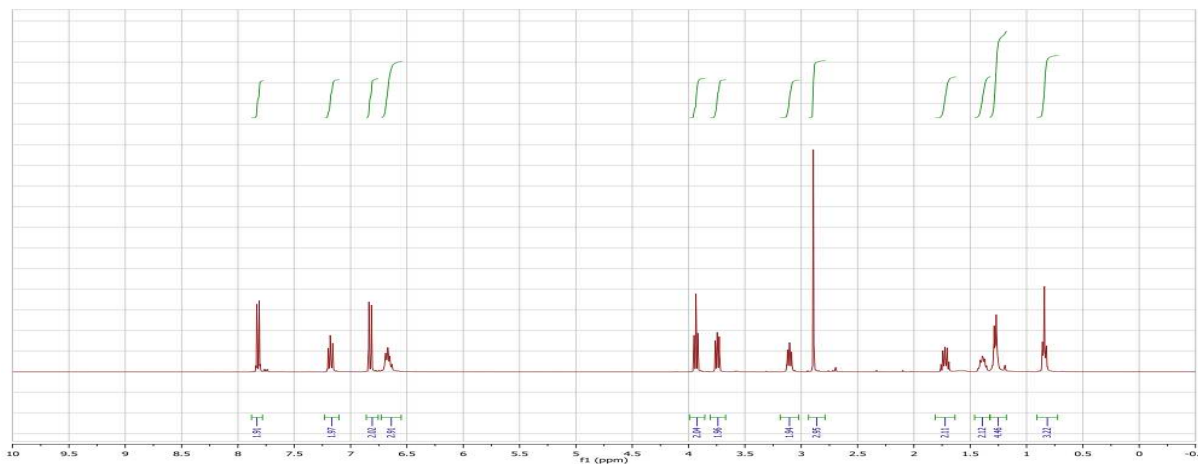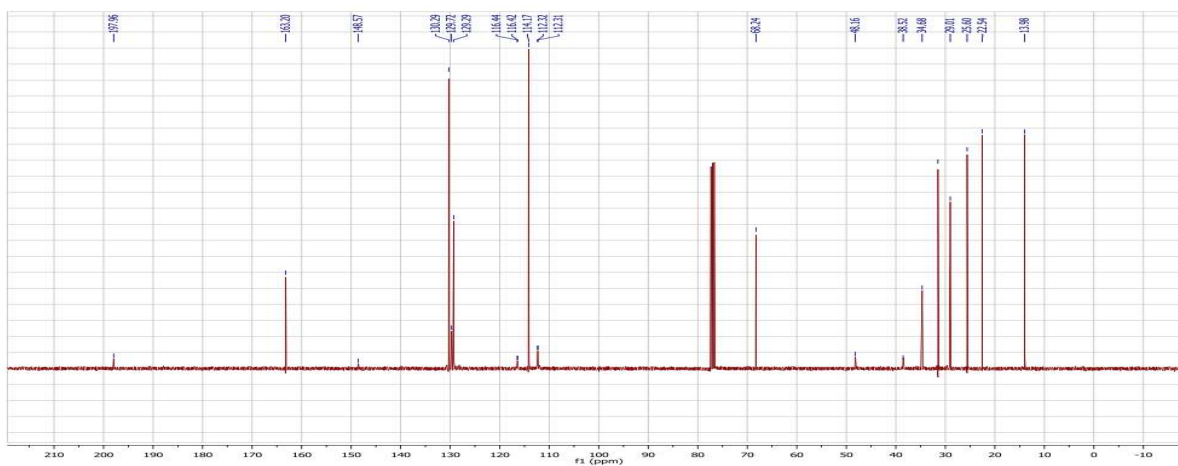

(1) ELSD Signal

377.755  
Range: 377.713

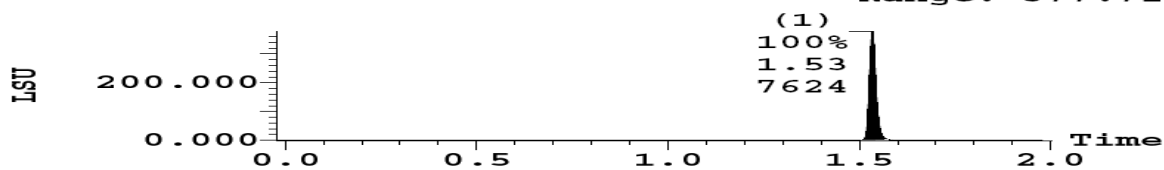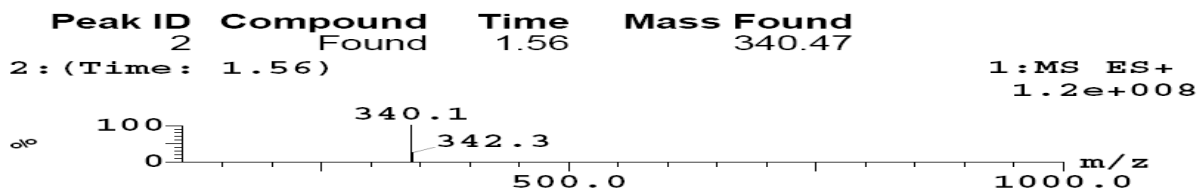

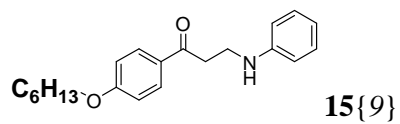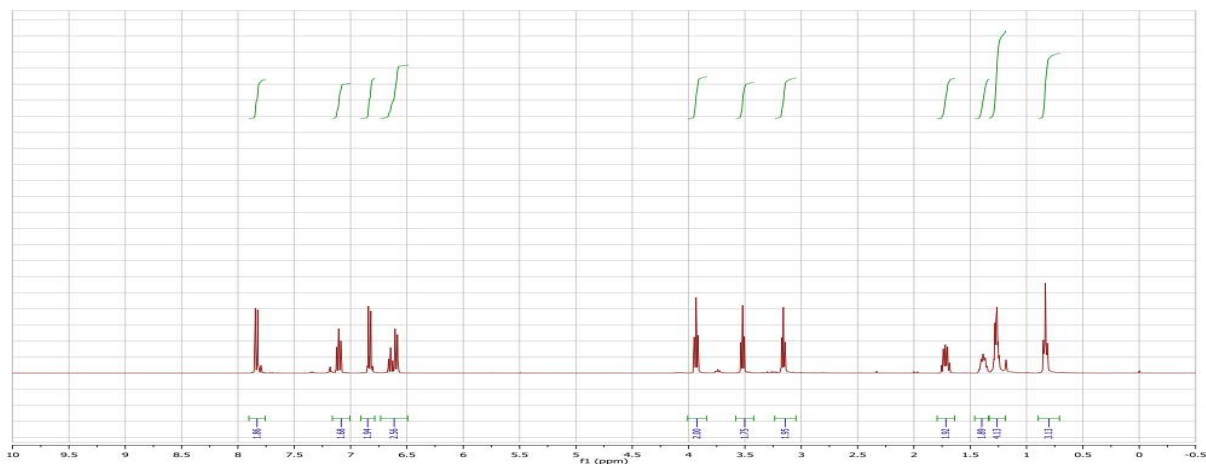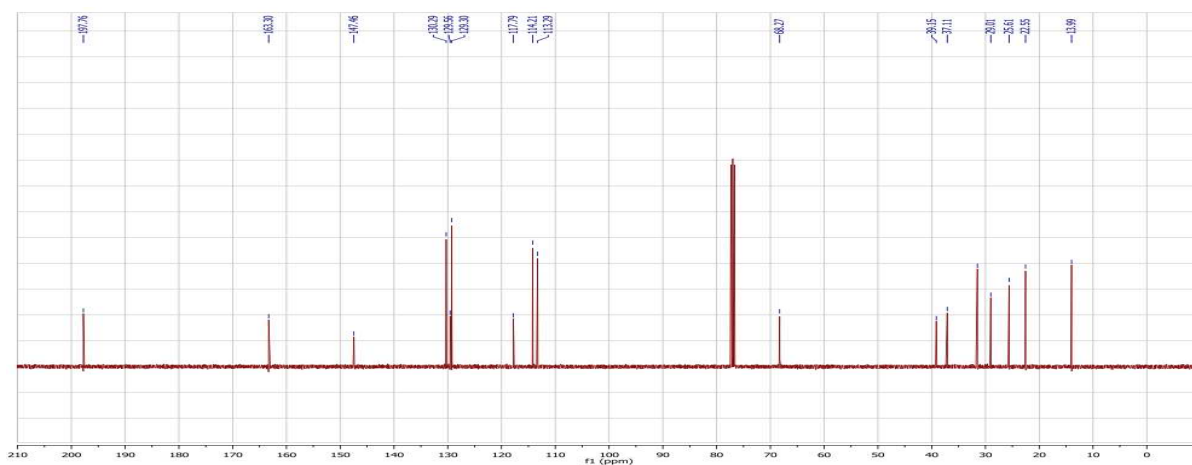

(1) ELSD Signal

24.758  
Range: 24.742

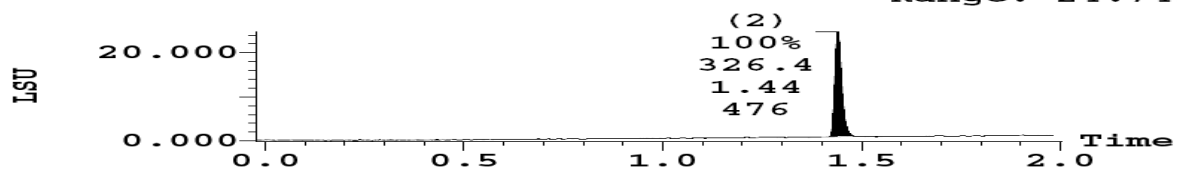

| Peak ID | Compound Found | Time | Mass Found |
|---------|----------------|------|------------|
| 2       | Found          | 1.44 | 326.44     |

2: (Time: 1.44)

1: MS ES+  
9.2e+007

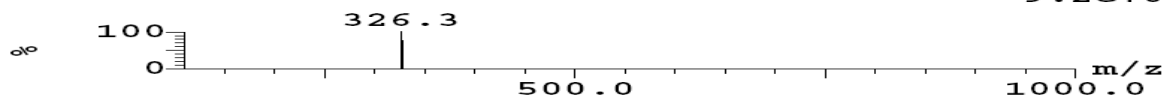

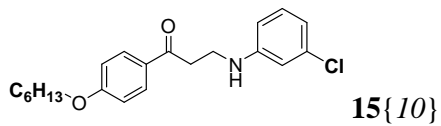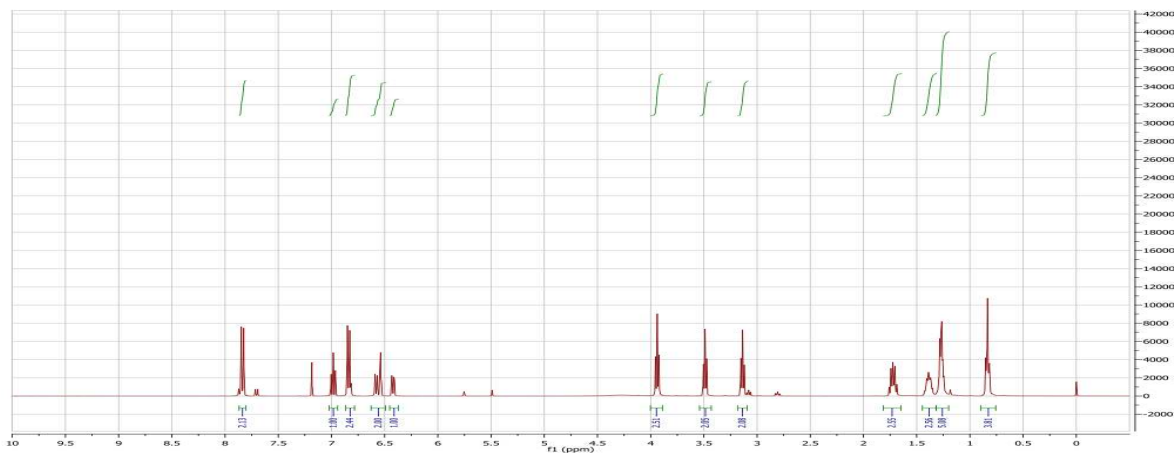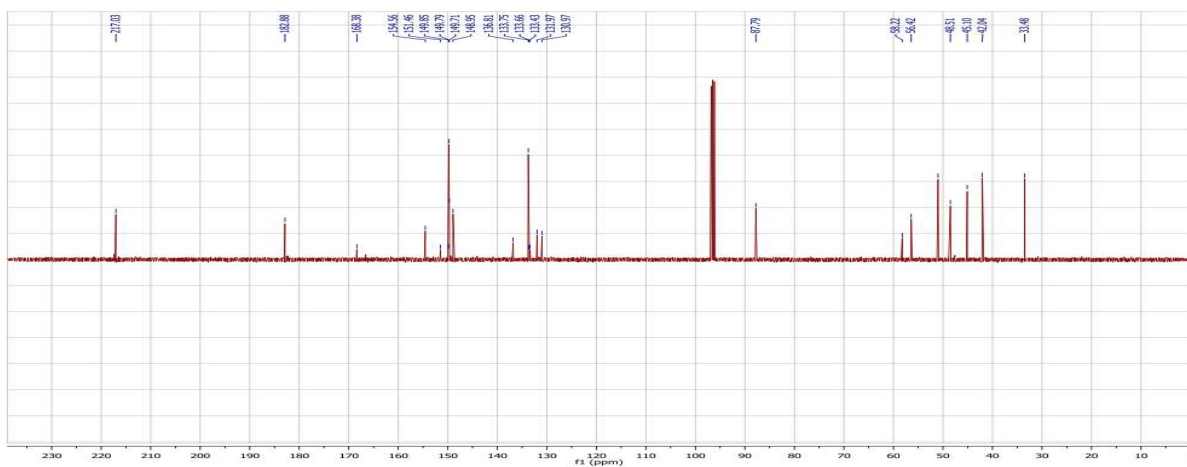

(1) ELSD Signal

73.001  
Range: 72.998

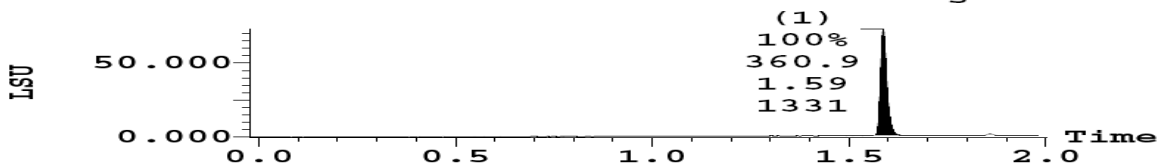

| Peak ID | Compound Found | Time | Mass Found |
|---------|----------------|------|------------|
| 1       |                | 1.59 | 360.89     |

1:MS ES+  
1.0e+008

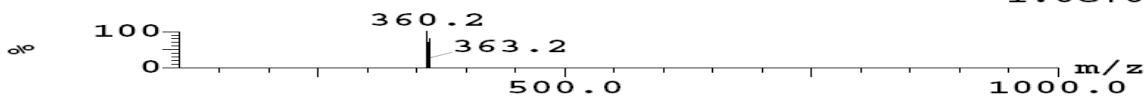

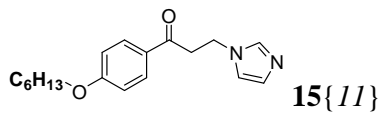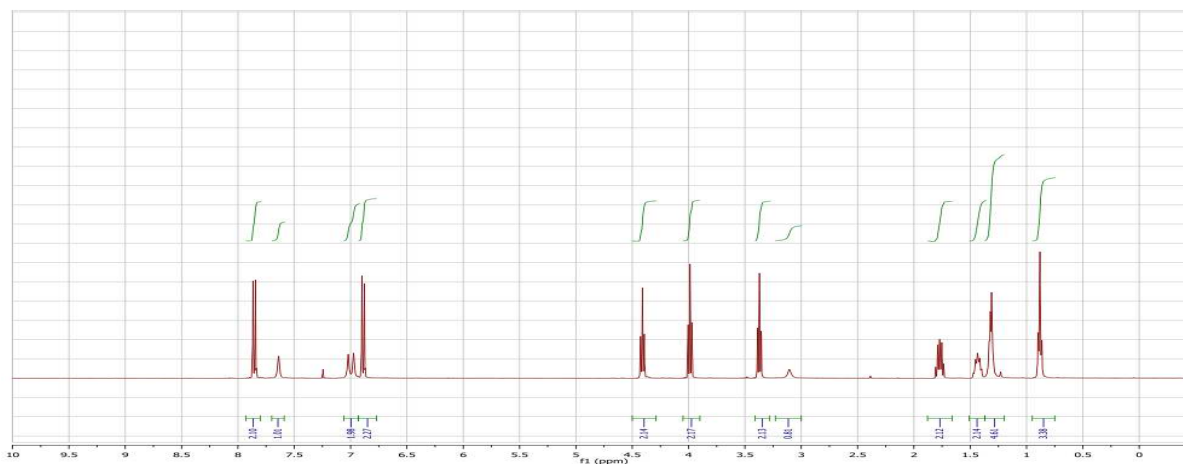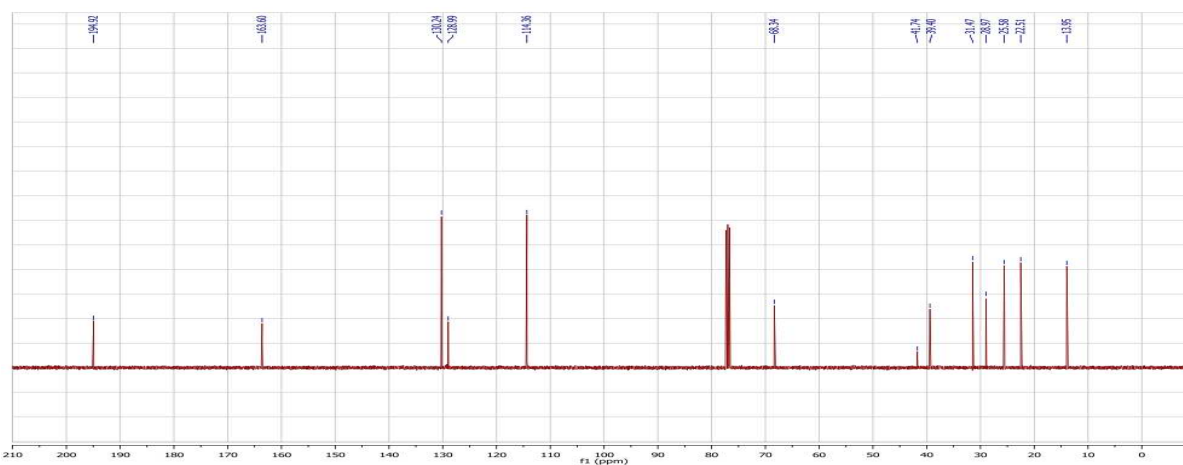

(1) ELSD Signal

15.614  
Range: 15.608

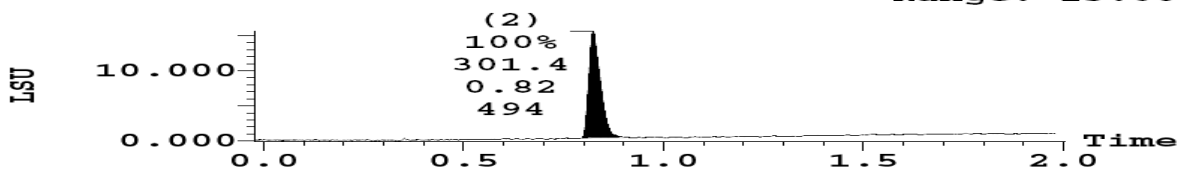

| Peak ID | Compound | Time | Mass Found |
|---------|----------|------|------------|
| 2       | Found    | 0.82 | 301.40     |

2: (Time: 0.82)

1:MS ES+  
8.0e+007

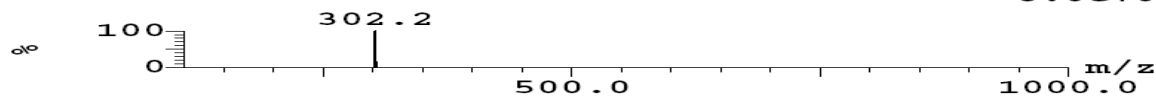



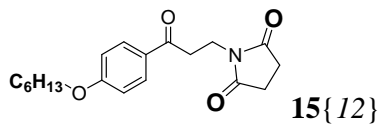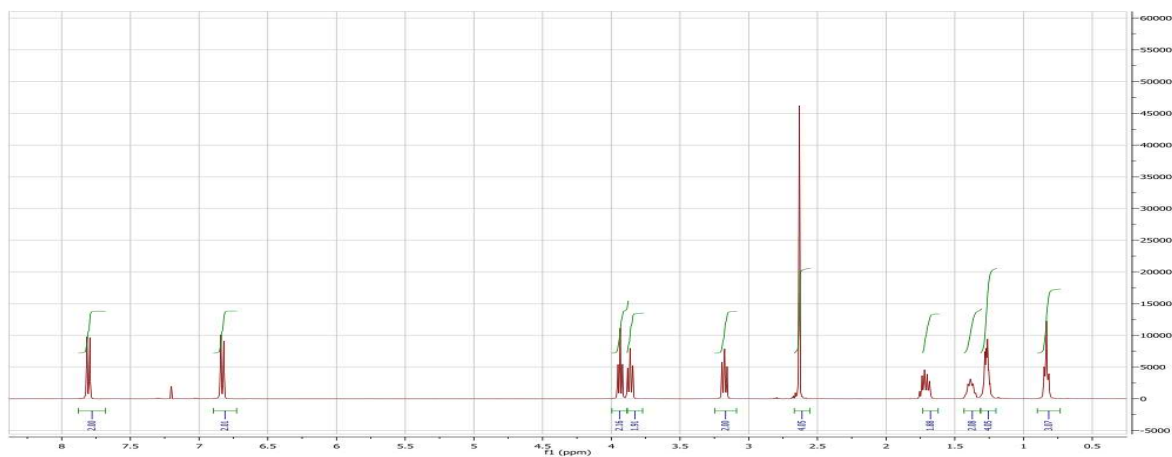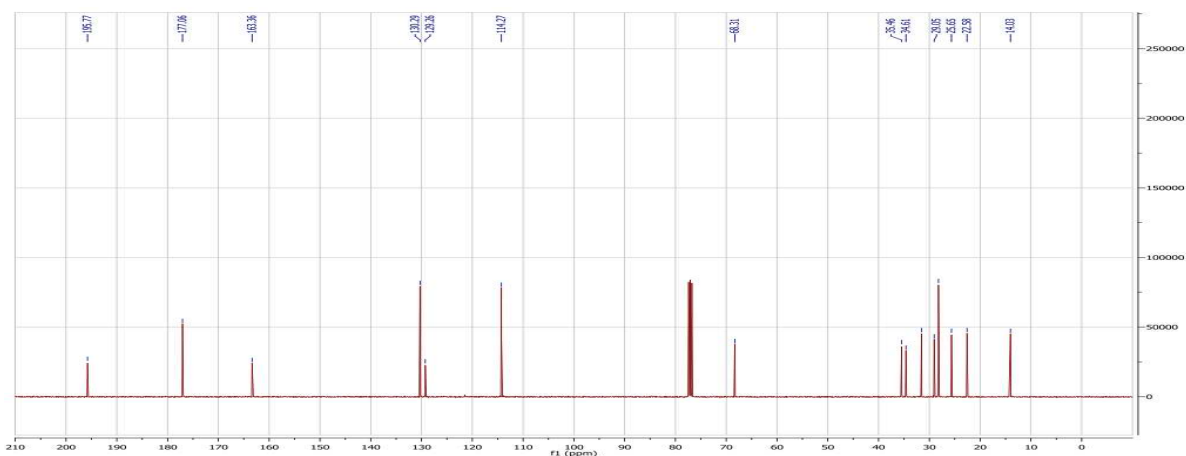

(1) ELSD Signal

245.149  
Range: 245.122

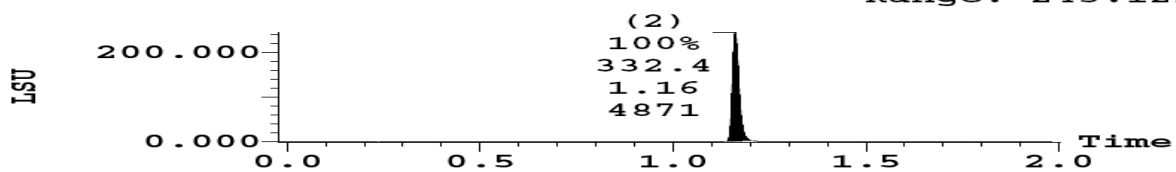

(2)  
 100%  
 332.4  
 1.16  
 4871

| Peak ID | Compound | Time | Mass Found |
|---------|----------|------|------------|
| 2       | Found    | 1.17 | 332.41     |

1:MS ES+  
8.2e+007

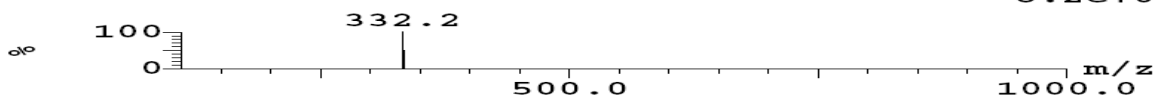

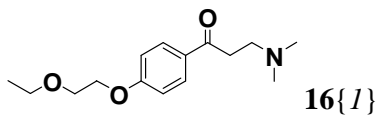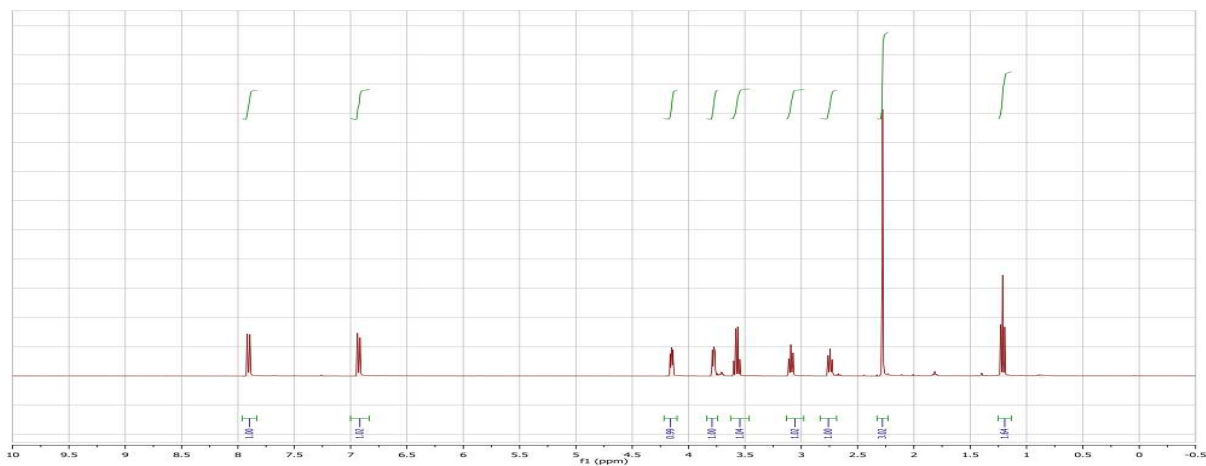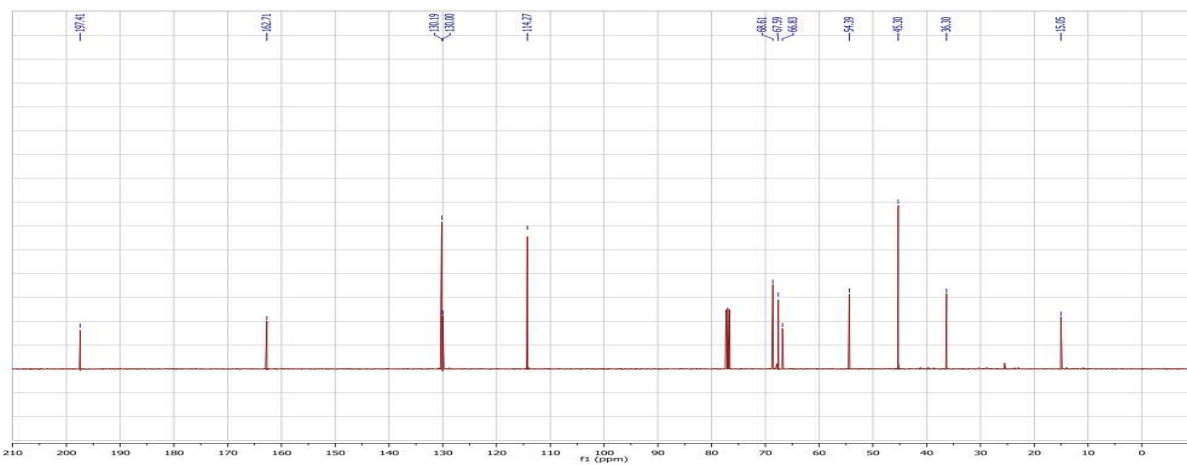

(1) ELSD Signal

67.192  
Range: 67.162

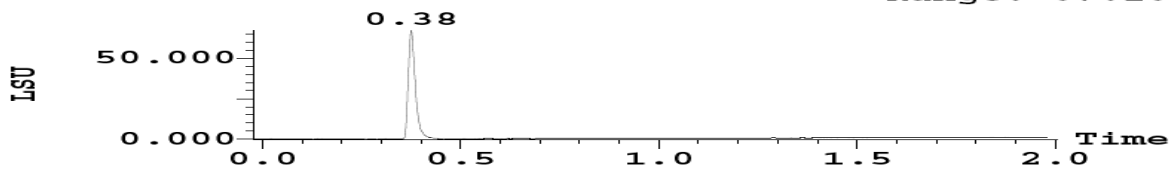

| Peak ID | Compound Found | Time | Mass Found |
|---------|----------------|------|------------|
| 1       | 1              | 0.39 | 266.35     |

1:MS ES+  
1.1e+008

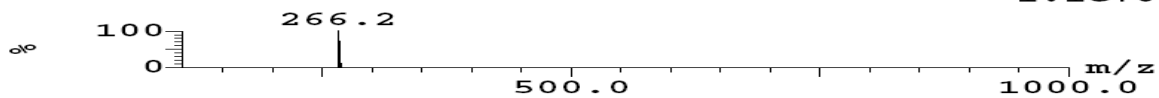

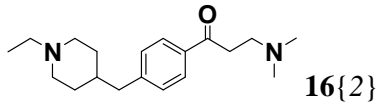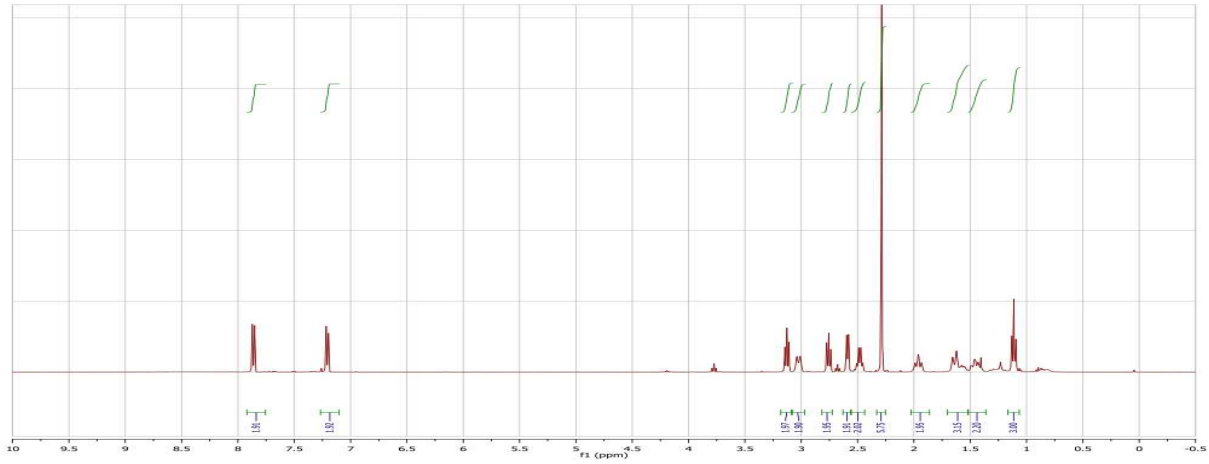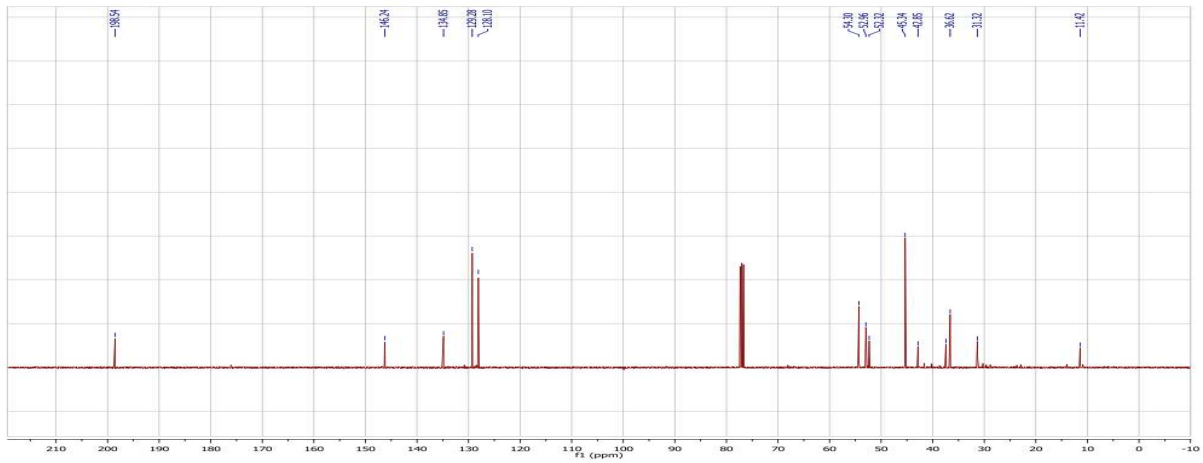

(1) ELSD Signal

37.345  
Range: 37.268

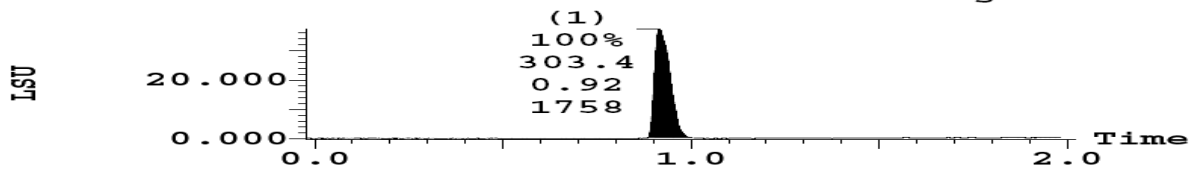

| Peak ID | Compound  | Time | Mass Found |
|---------|-----------|------|------------|
| 1       | Tentative | 0.93 | 303.35     |

1:MS ES+  
1.1e+008

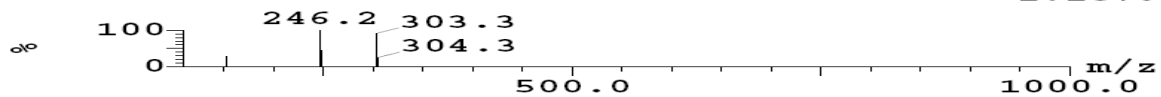

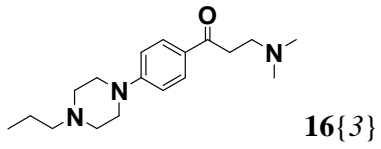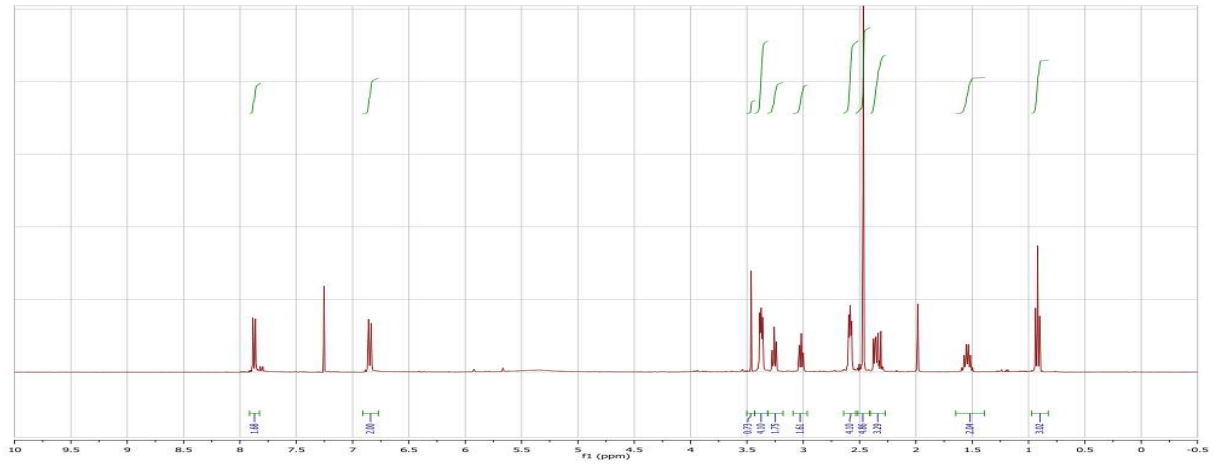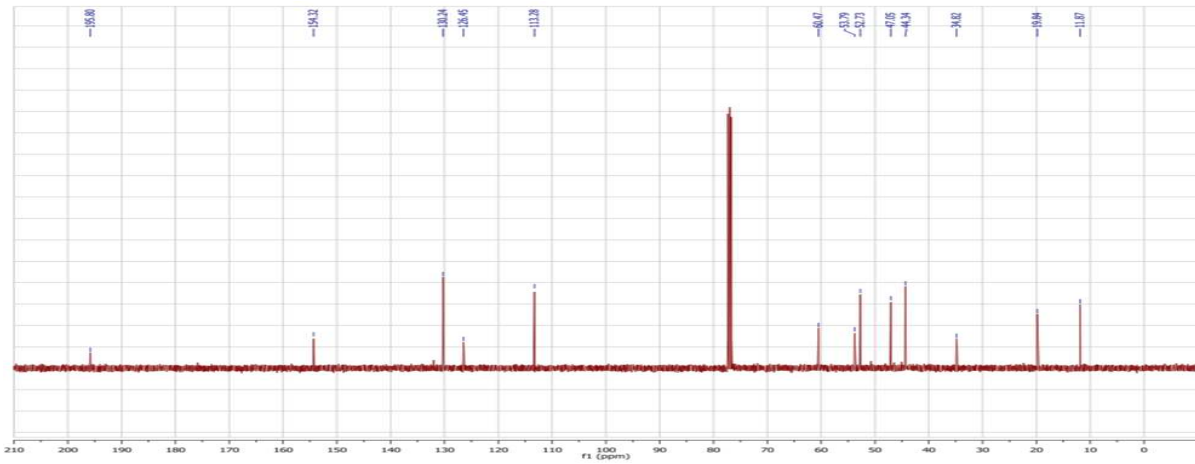

(1) ELSD Signal

Range: 3.602 - 3.612

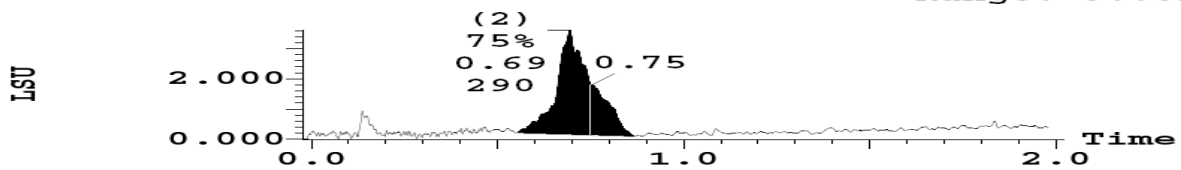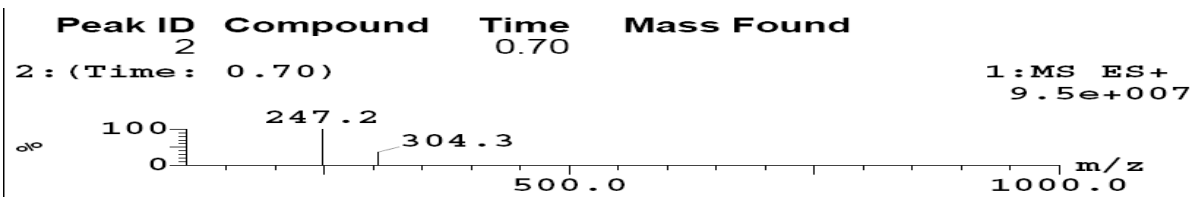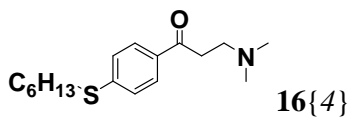

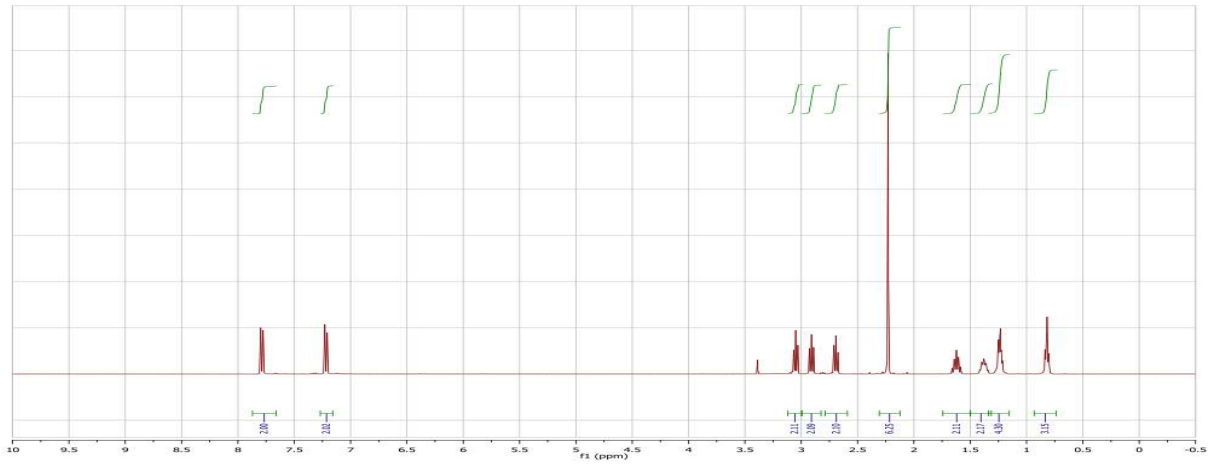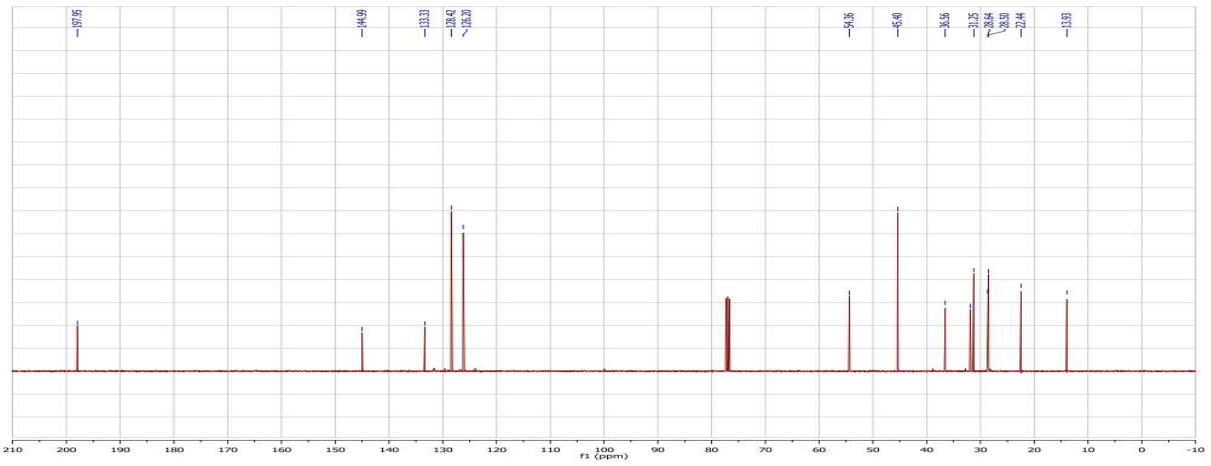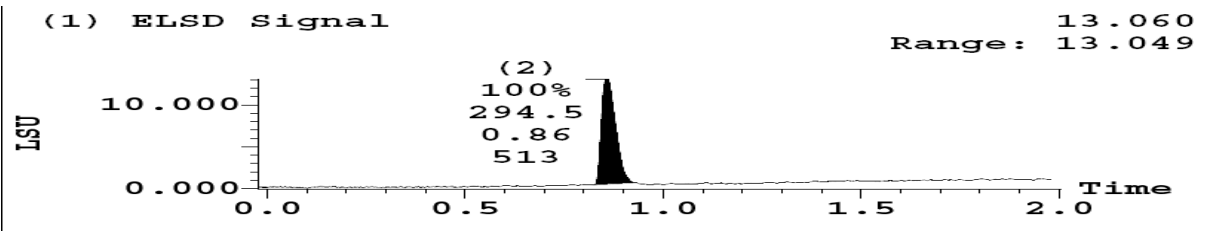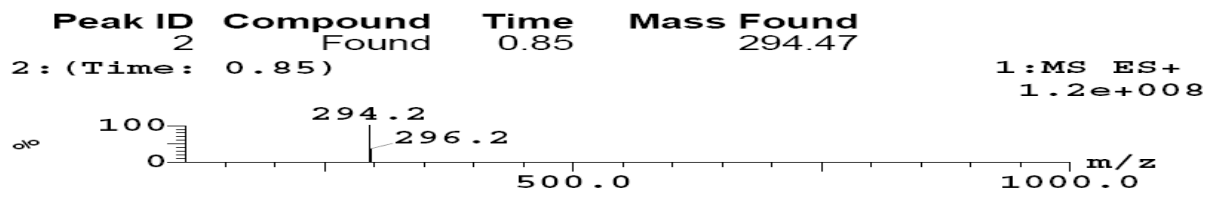

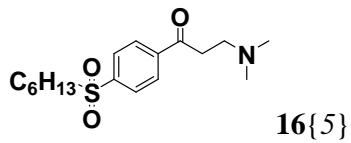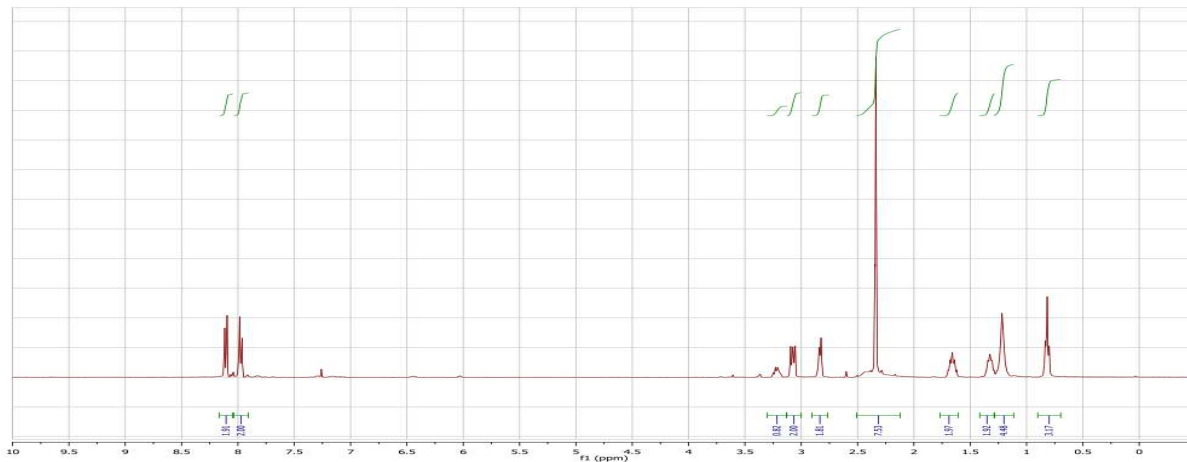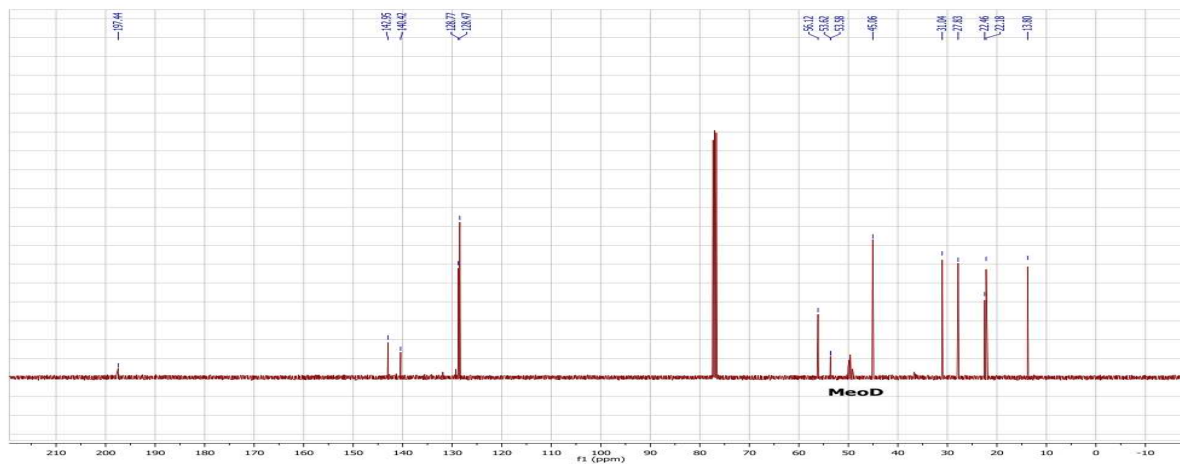

(1) ELSD Signal

11.912  
Range: 11.872

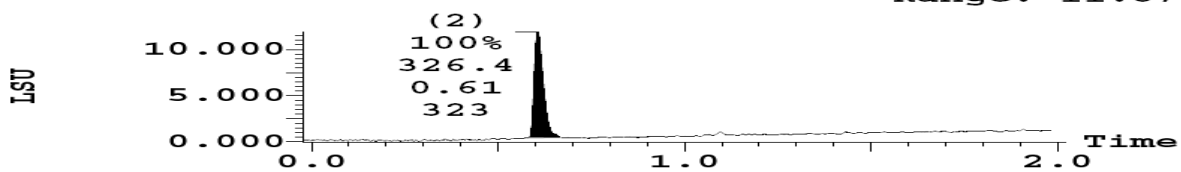

| Peak ID | Compound | Time | Mass Found |
|---------|----------|------|------------|
| 2       | Found    | 0.61 | 326.37     |

1:MS ES+  
9.1e+007

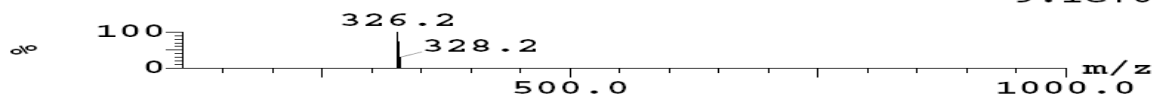

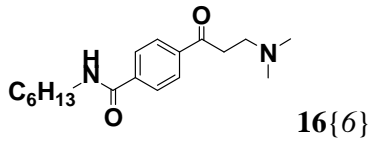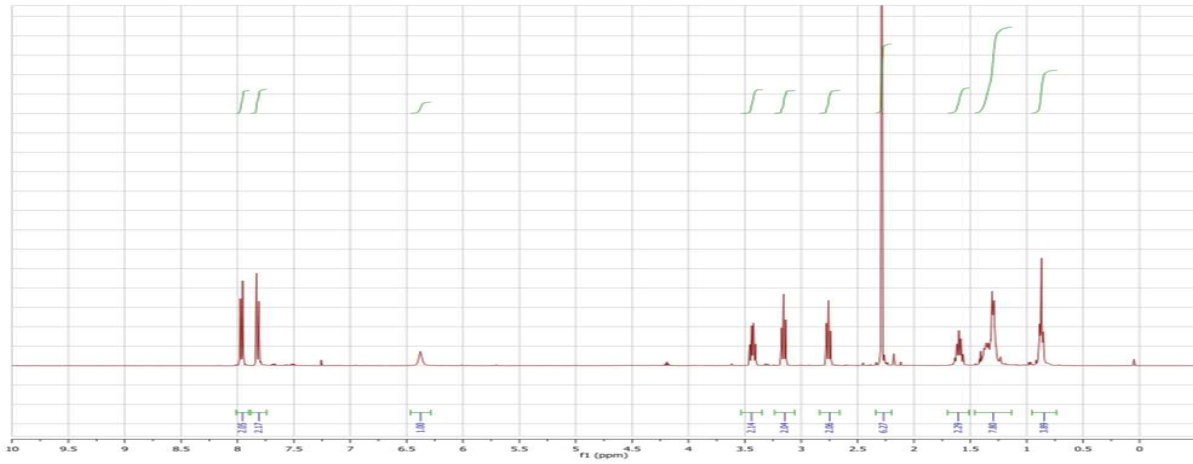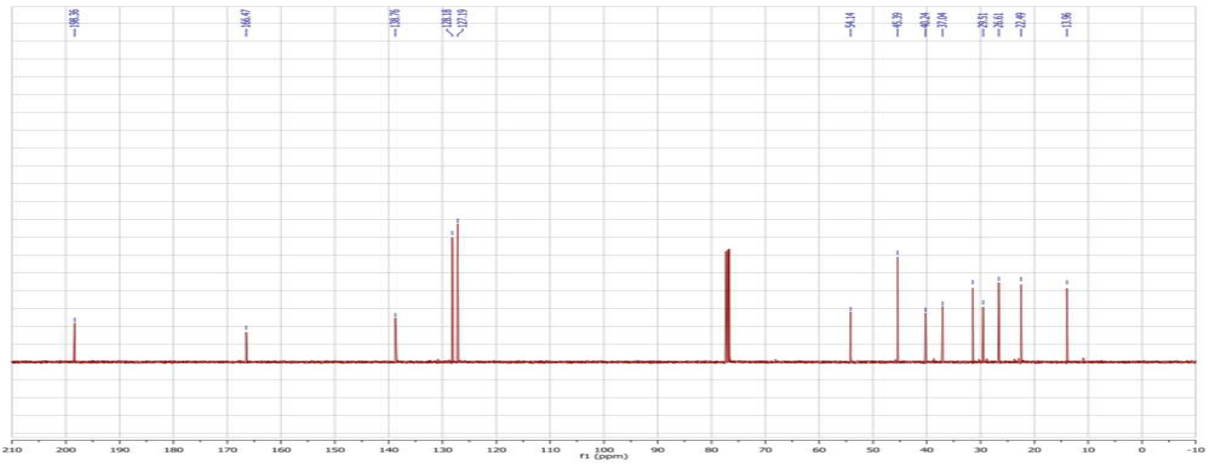

(1) ELSD Signal

32.534  
Range: 32.472

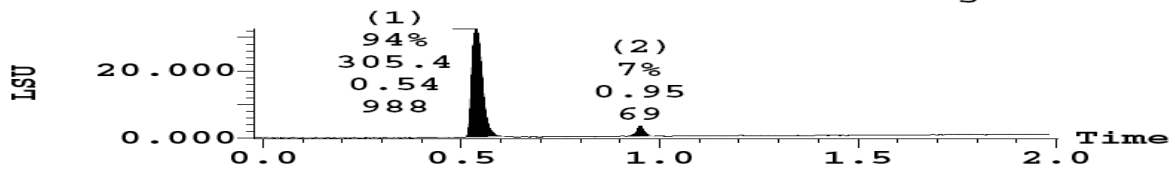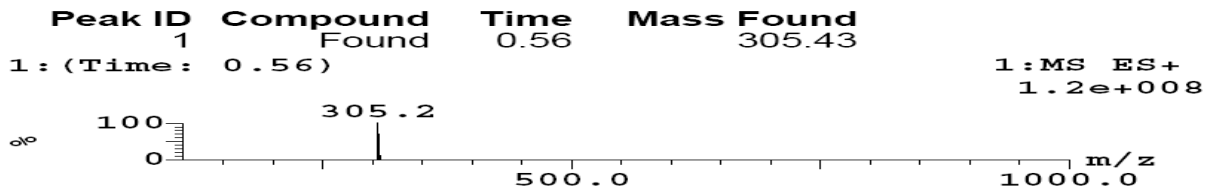

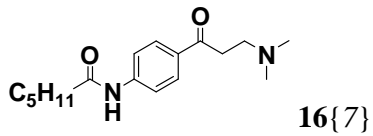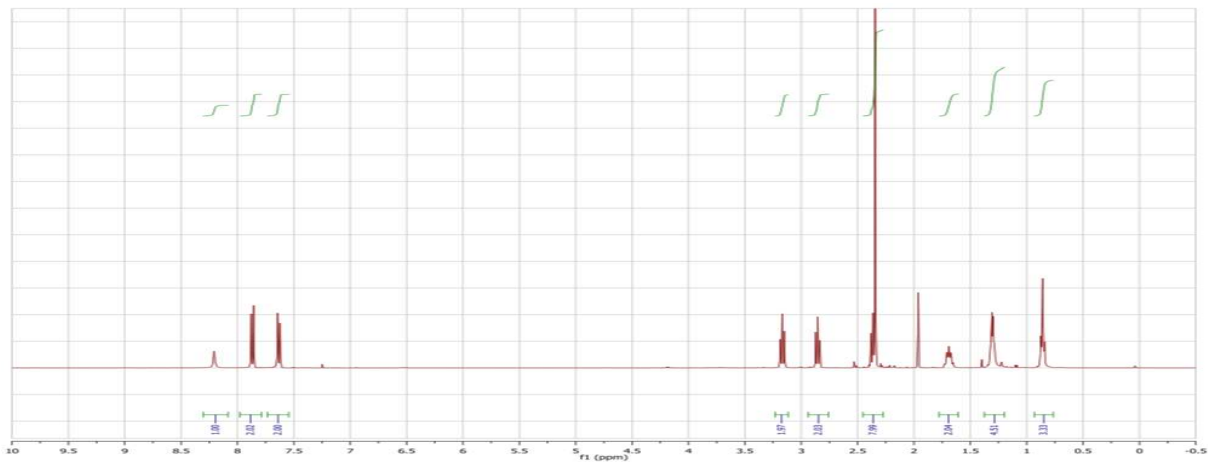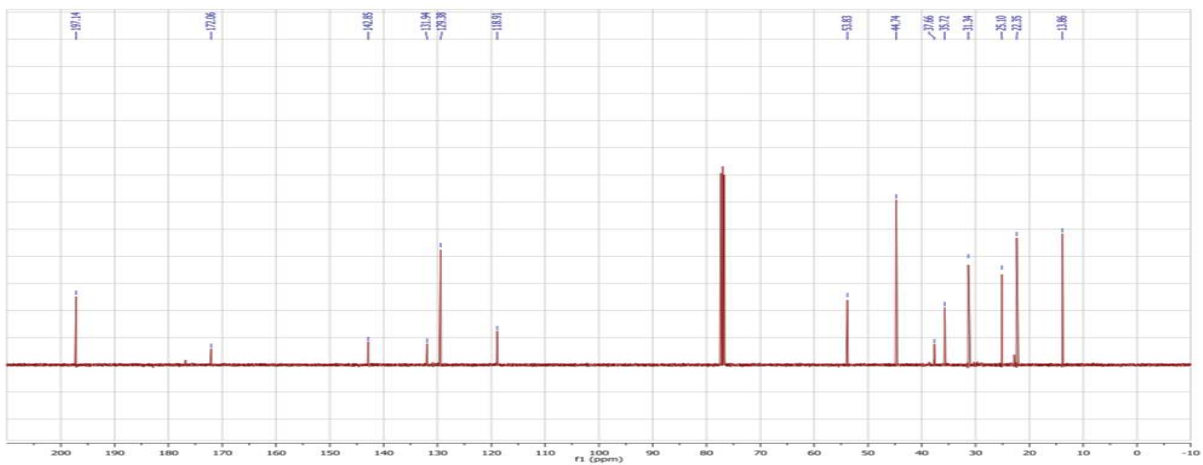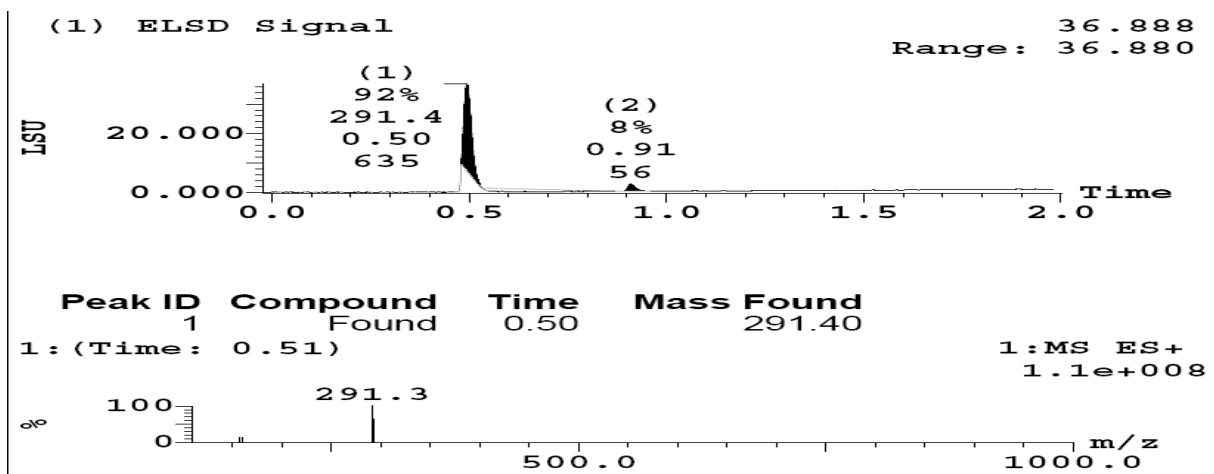



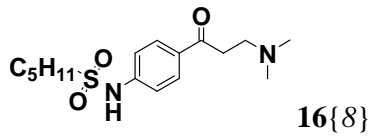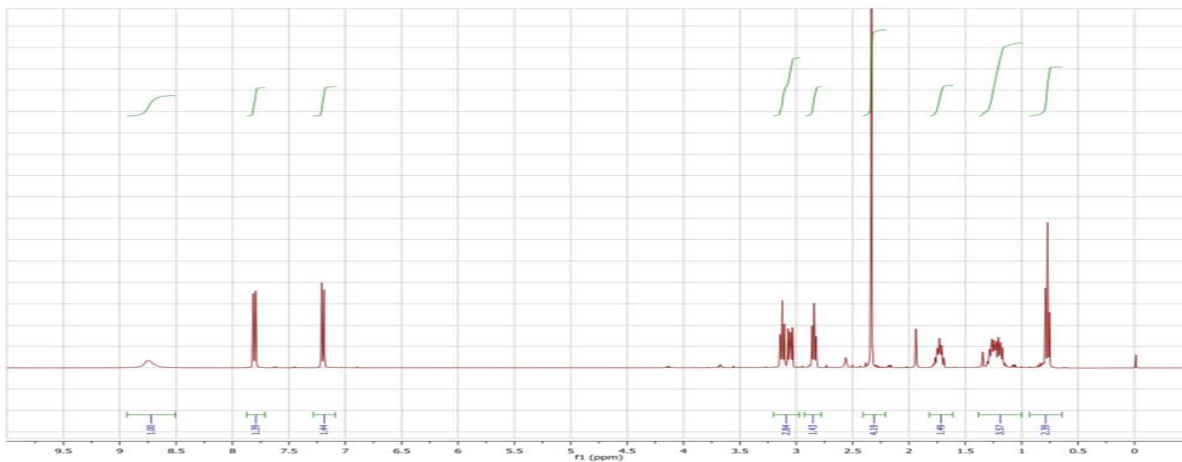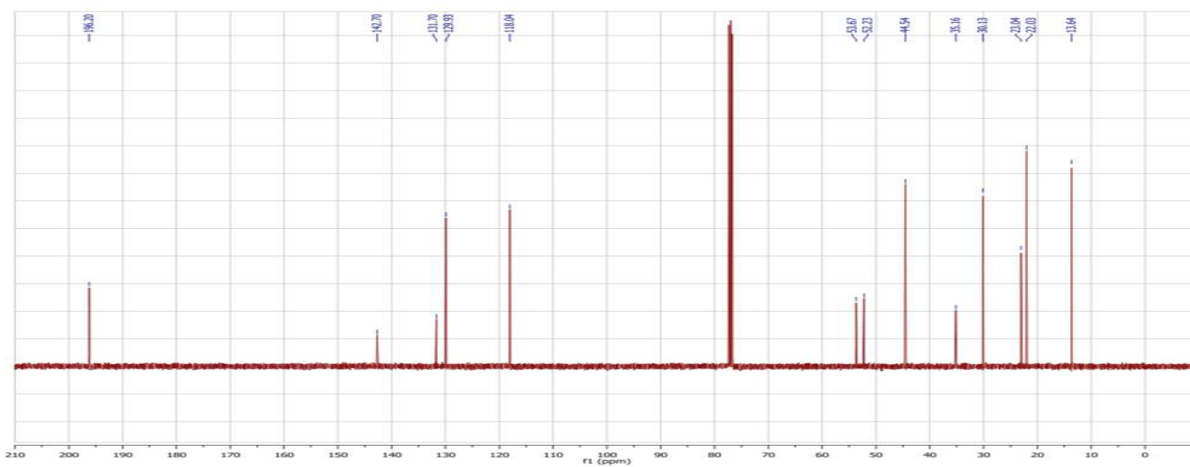

(1) ELSD Signal

68.376  
Range: 68.346

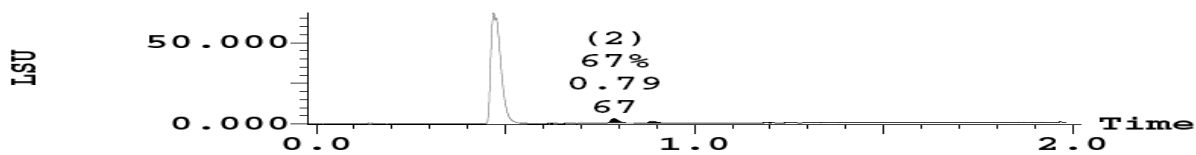

| Peak ID | Compound Found | Time | Mass Found |
|---------|----------------|------|------------|
| 1       |                | 0.47 | 327.35     |

1: (Time: 0.47)

1: MS ES+  
9.5e+007

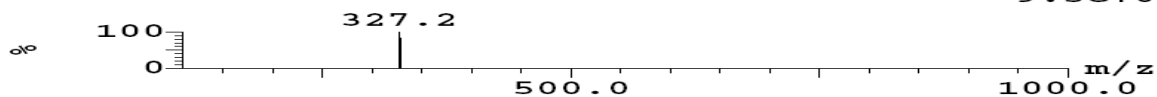

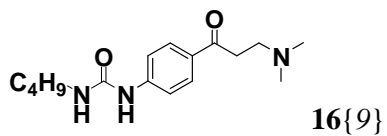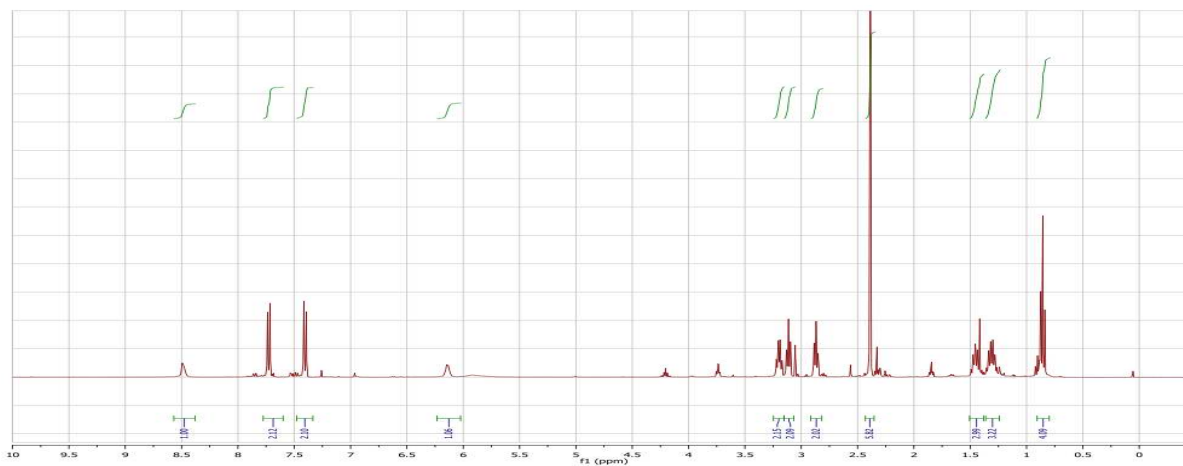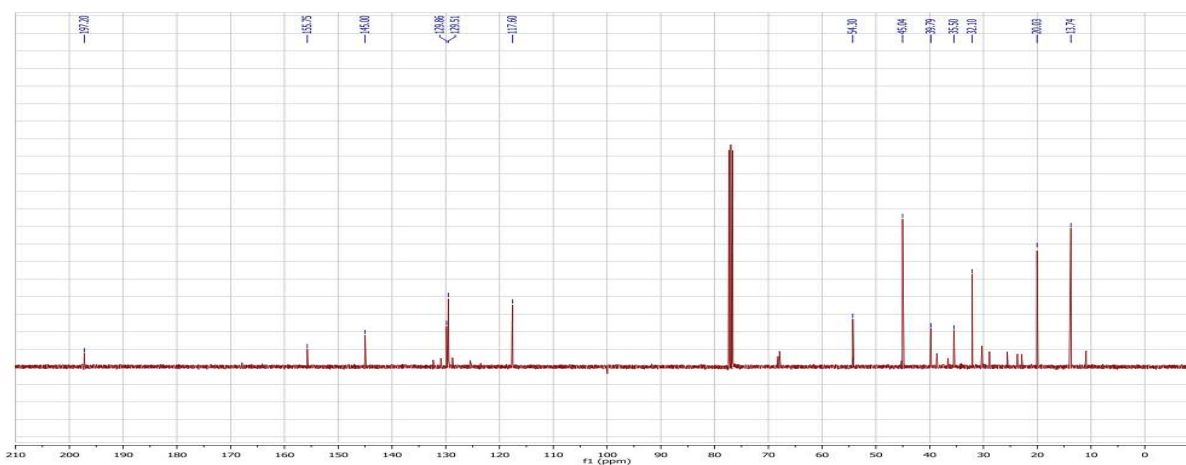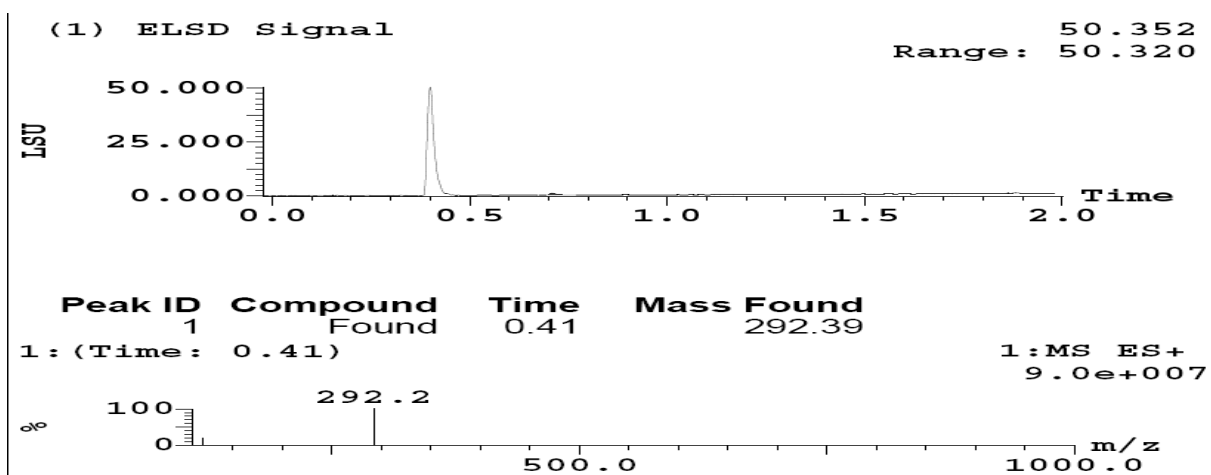

17{1,1,1} Same with 12{11}

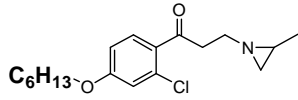

17{1,1,2}

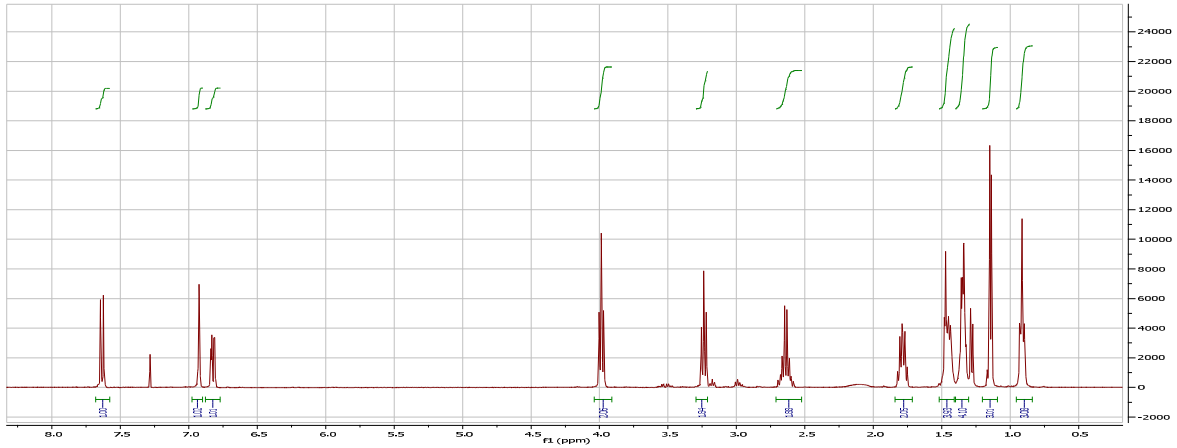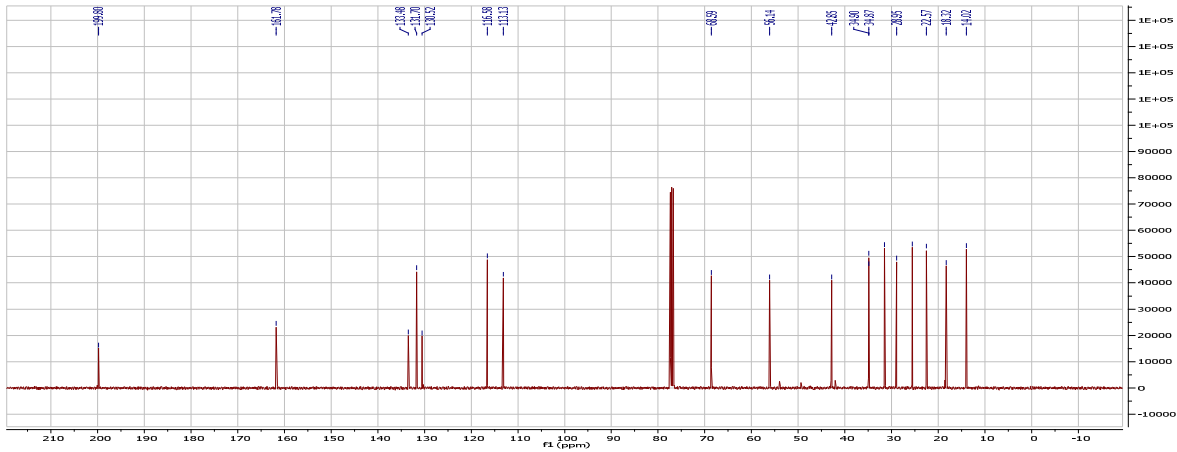

(1) ELSD Signal 320.968  
Range: 320.955

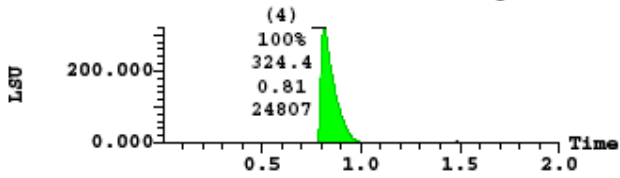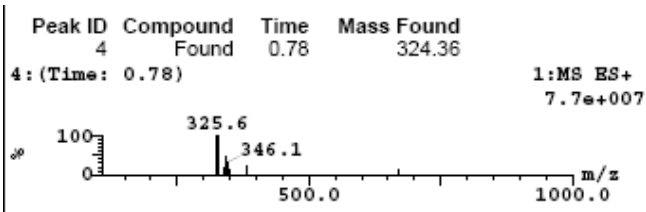

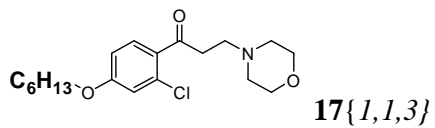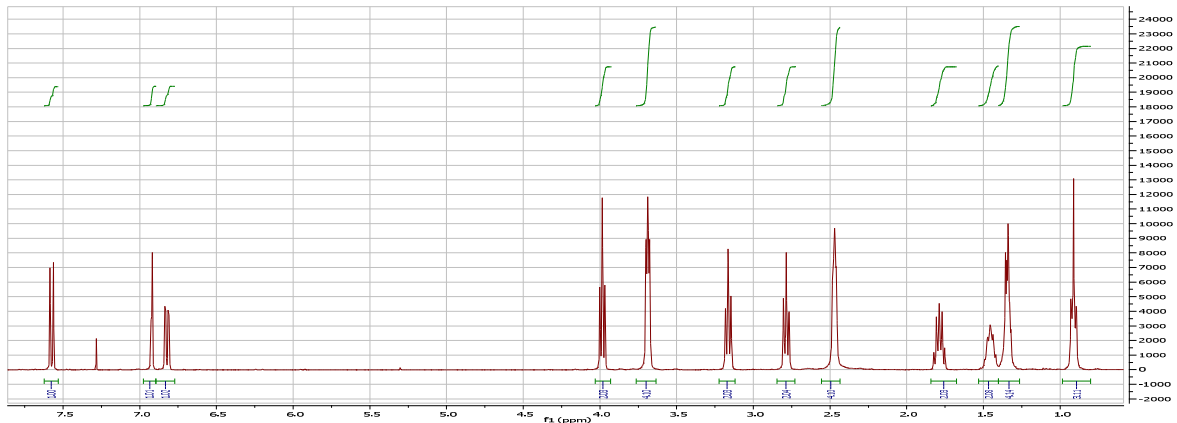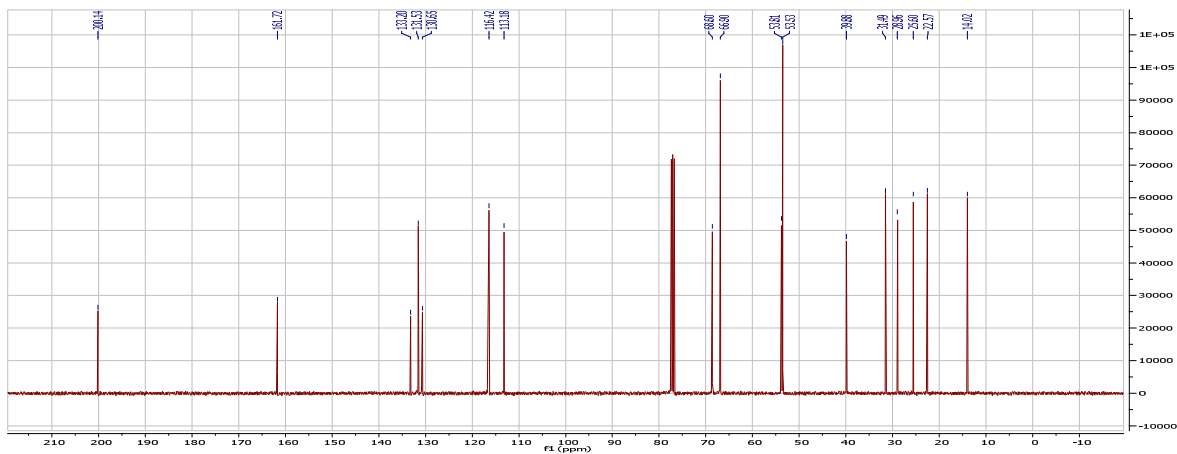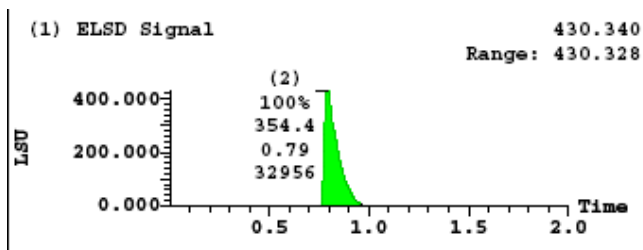

| Peak ID | Compound | Time | Mass Found |
|---------|----------|------|------------|
| 2       | Found    | 0.77 | 354.39     |

2: (Time: 0.77) 1:MS ES+  
1.0e+008

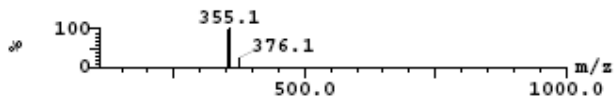

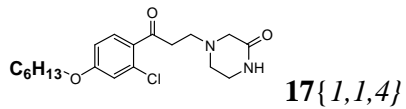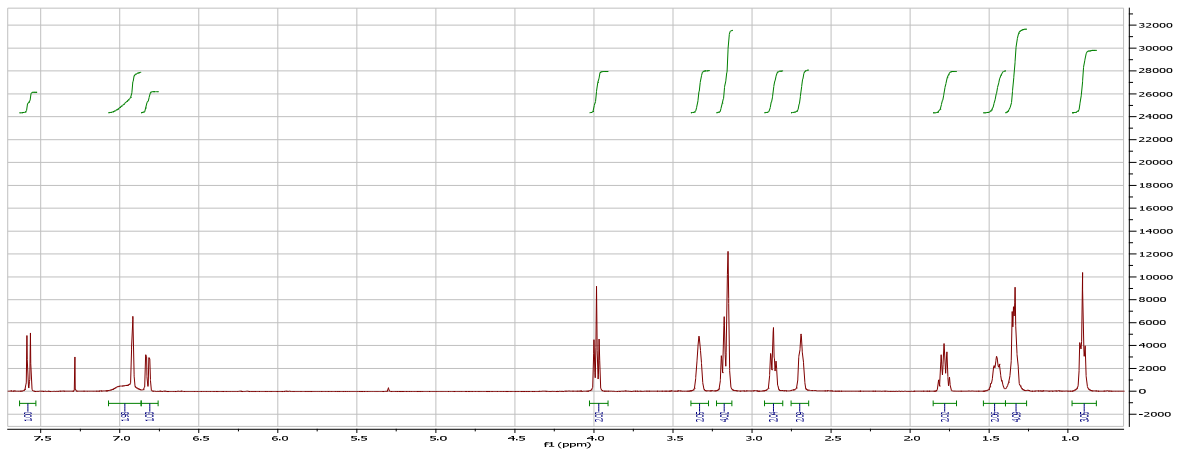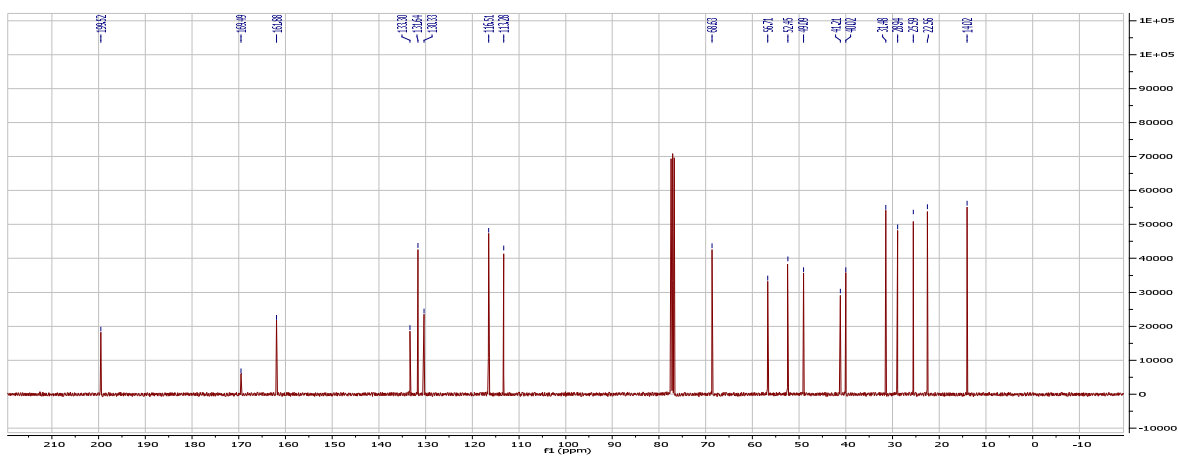

(1) ELSD Signal 885.760  
Range: 885.751

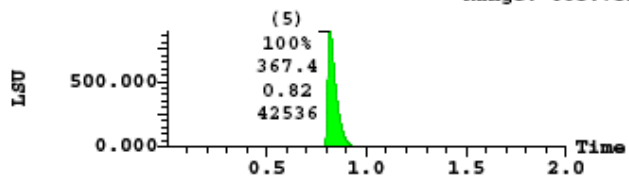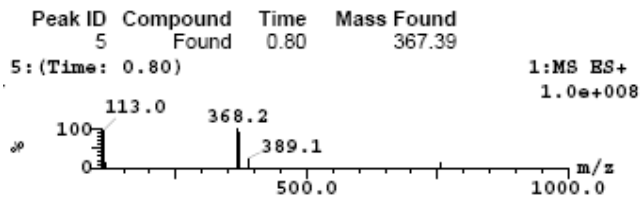

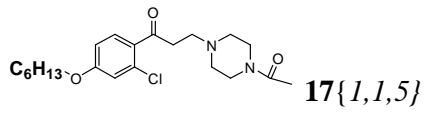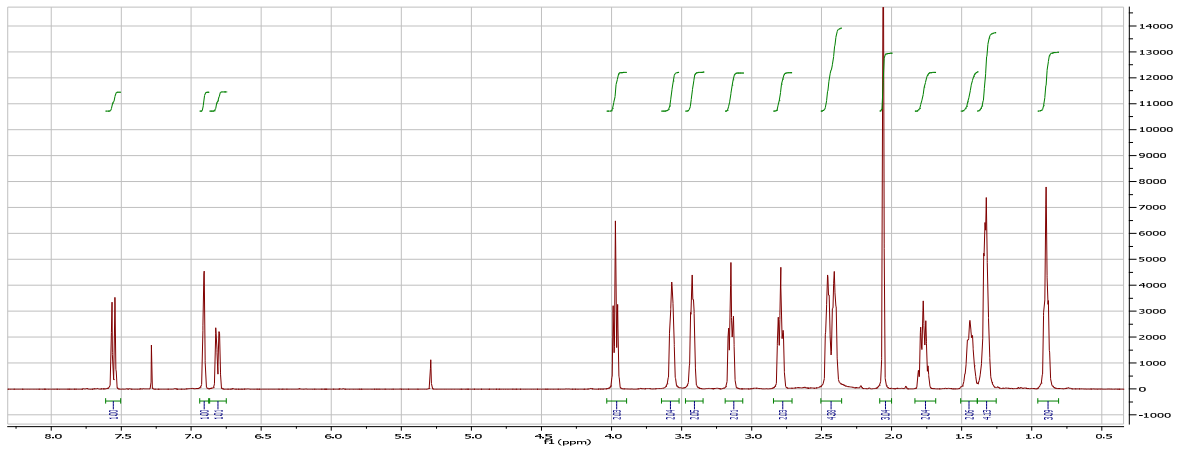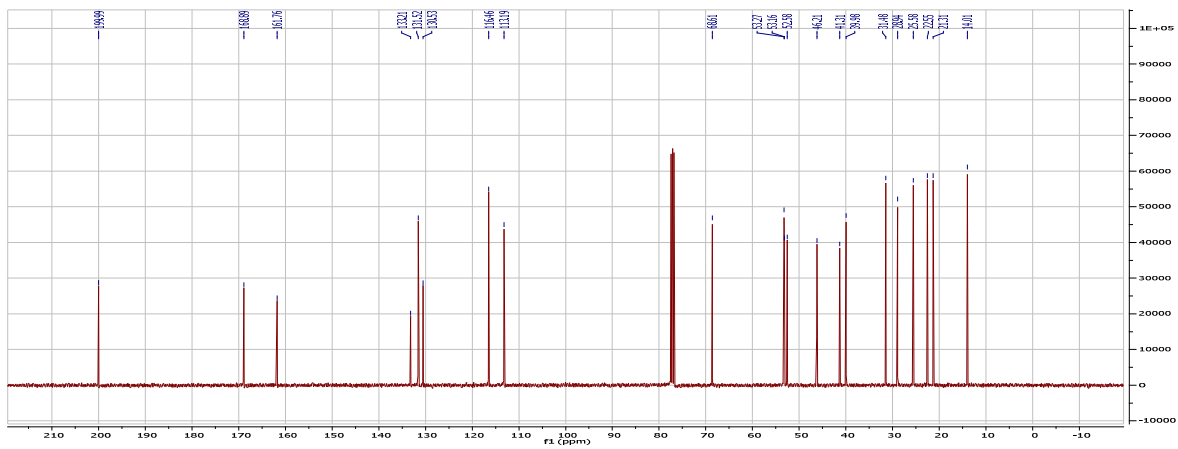

(1) ELSD Signal 567.788  
Range: 567.766

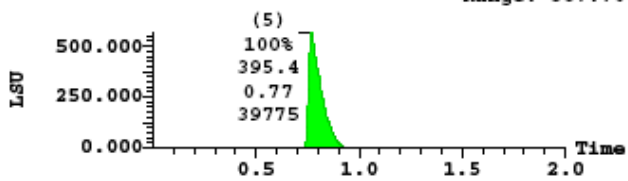

| Peak ID | Compound | Time | Mass Found |
|---------|----------|------|------------|
| 5       | Found    | 0.76 | 395.44     |

5: (Time: 0.76) 1:MS ES+ 1.2e+008

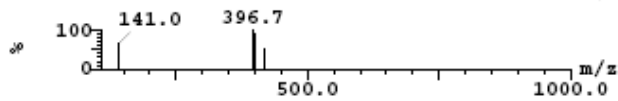

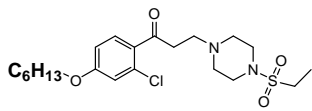

17{1,1,6}

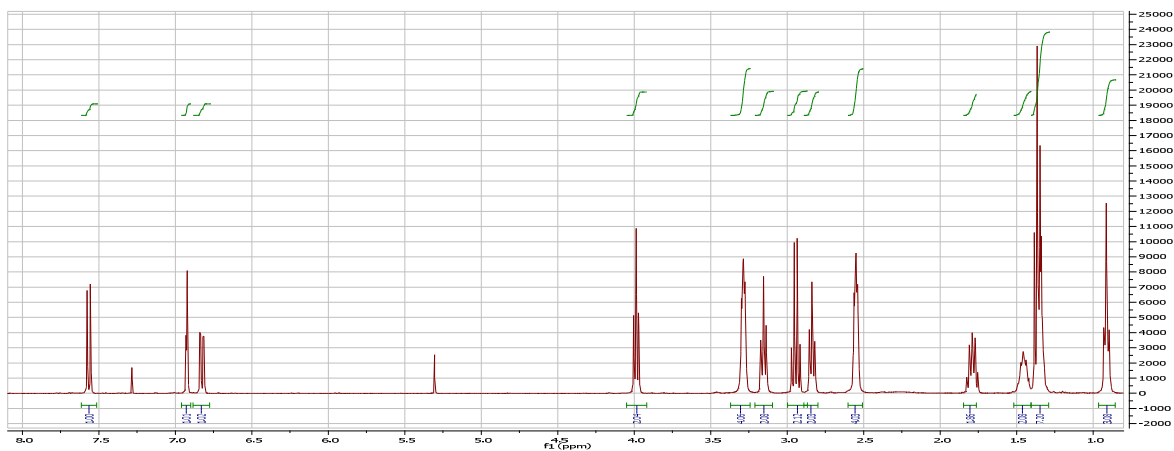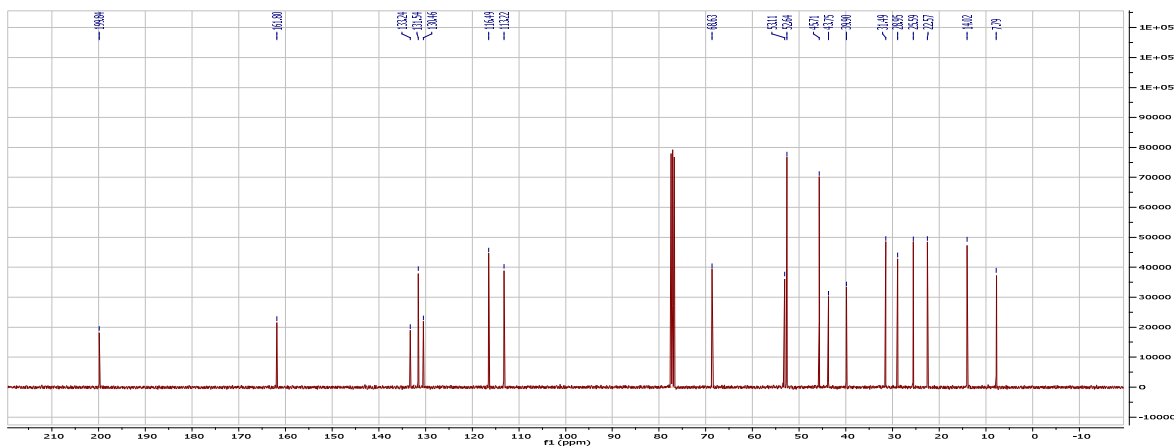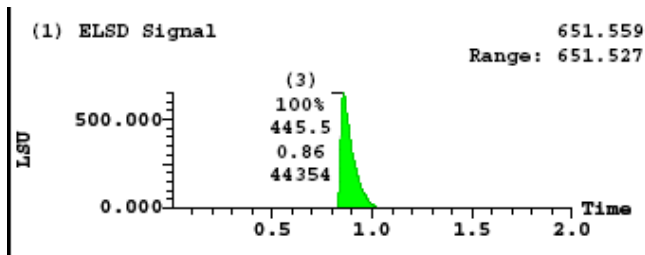

| Peak ID | Compound | Time | Mass Found |
|---------|----------|------|------------|
| 3       | Found    | 0.84 | 445.52     |

3: (Time: 0.84) 1:MS ES+  
6.5e+007

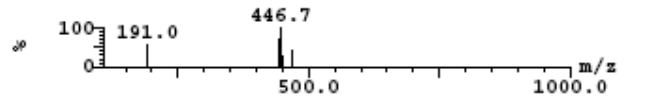

17{1,2,1} Same with 12{24}

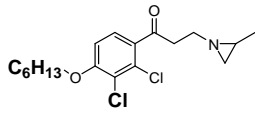

17{1,2,2}

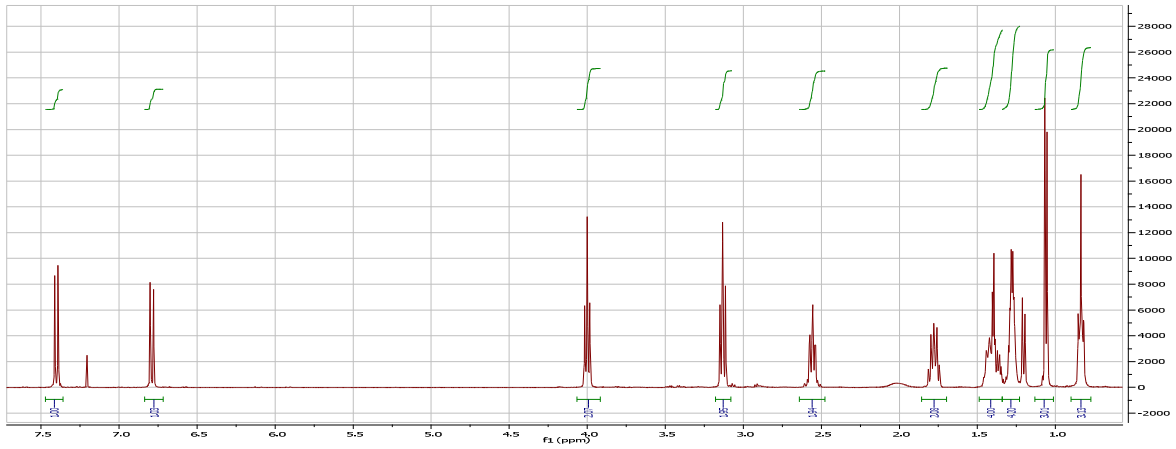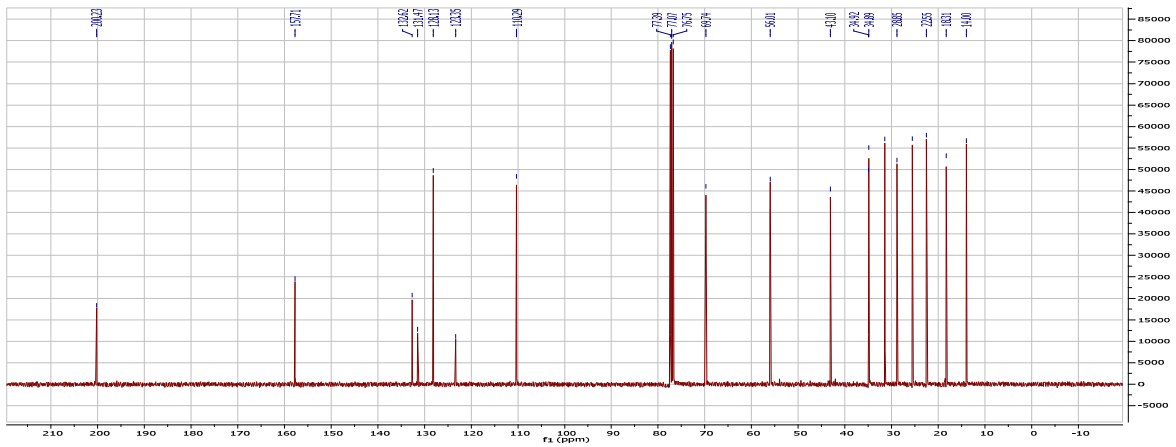

(1) ELSD Signal 380.806  
Range: 380.775

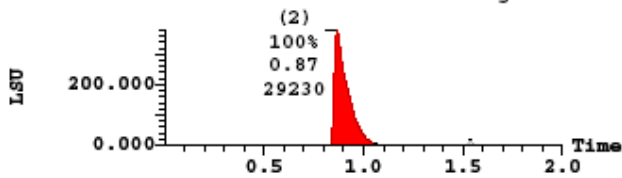

| Peak ID | Compound | Time | Mass Found |
|---------|----------|------|------------|
| 3       | Found    | 0.88 | 358.31     |

3: (Time: 0.88) 1:MS ES+ 1.2e+008

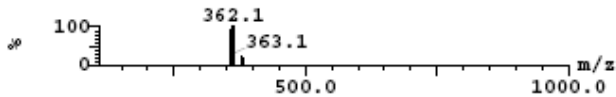



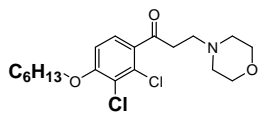

17{1,2,3}

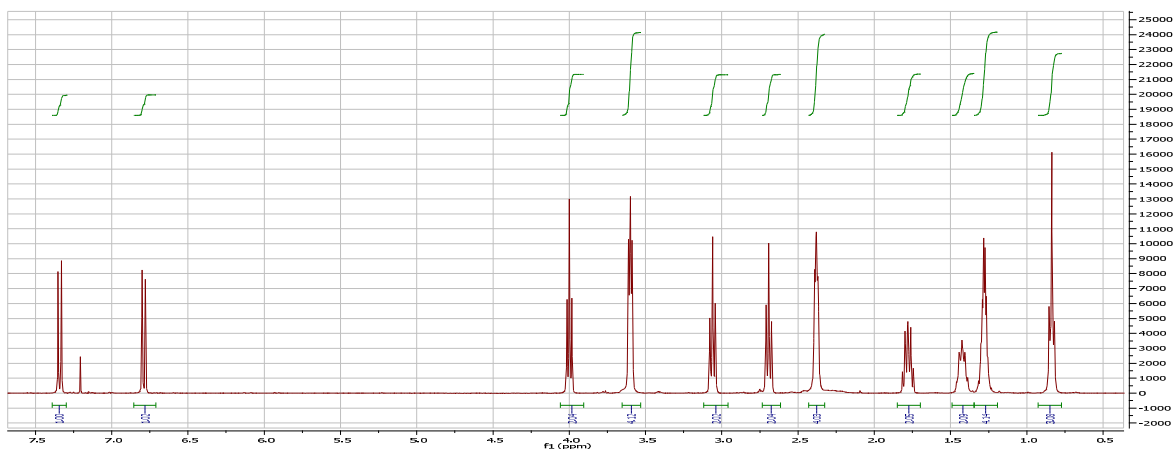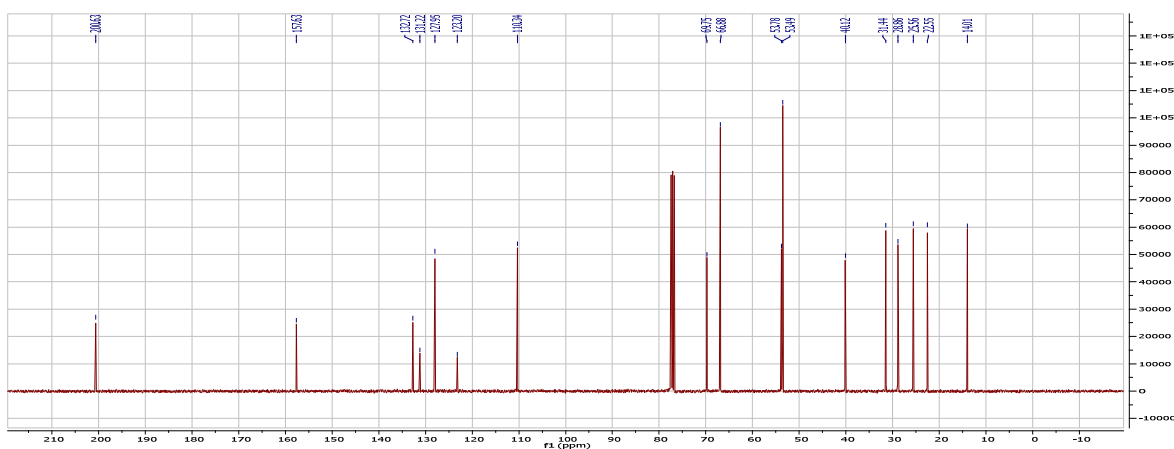

(1) ELSD Signal 462.836  
Range: 462.813

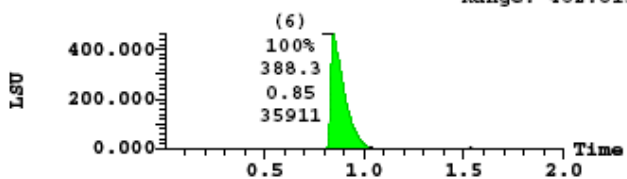

| Peak ID | Compound | Time | Mass Found |
|---------|----------|------|------------|
| 7       | Found    | 0.89 | 388.34     |

7: (Time: 0.89) 1:MS ES+  
9.6e+007

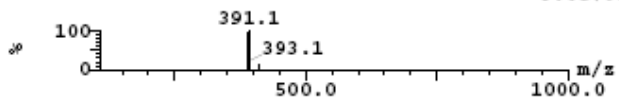

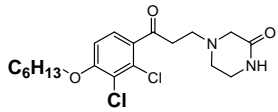

17{1,2,4}

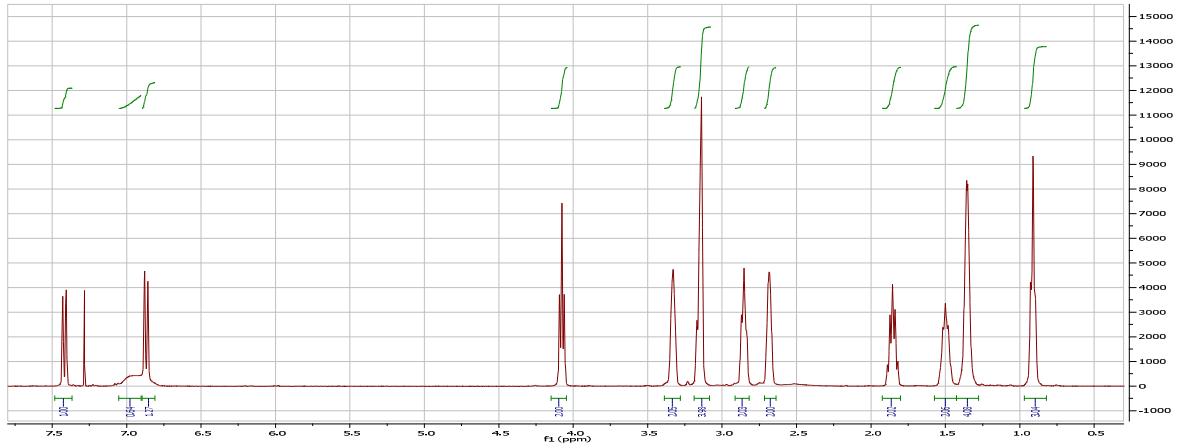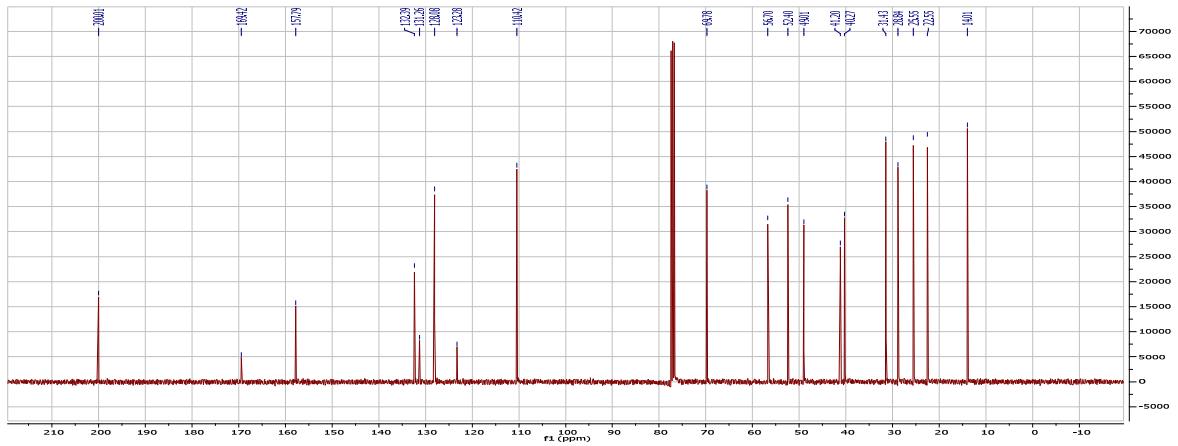

(1) ELSD Signal 1731.822  
Range: 1731.788

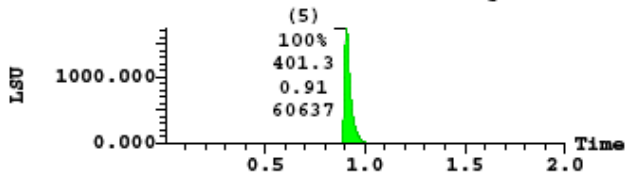

| Peak ID | Compound | Time | Mass Found |
|---------|----------|------|------------|
| 5       | Found    | 0.89 | 401.33     |

5: (Time: 0.89) 1:MS ES+  
8.9e+007

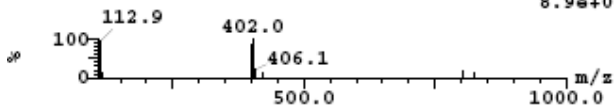

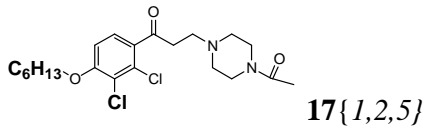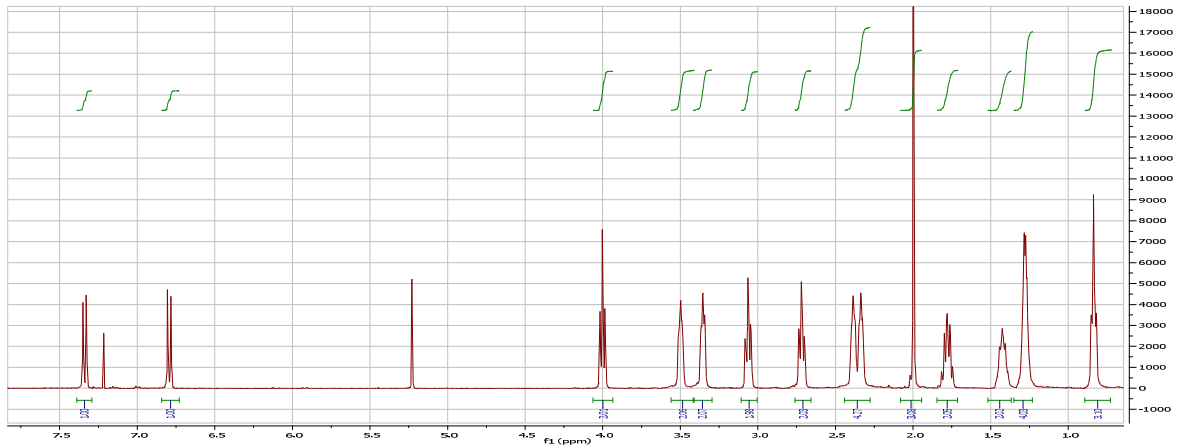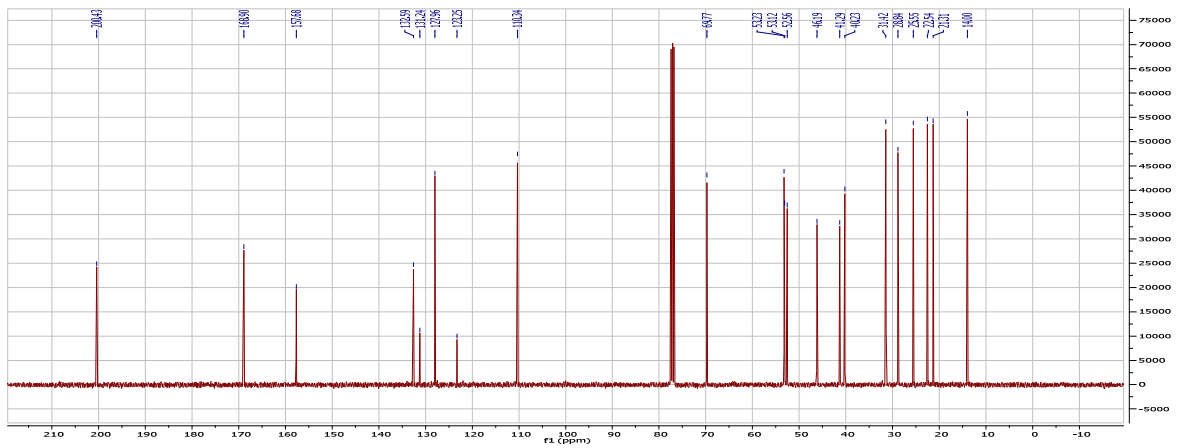

(1) ELSD Signal 540.592  
Range: 540.565

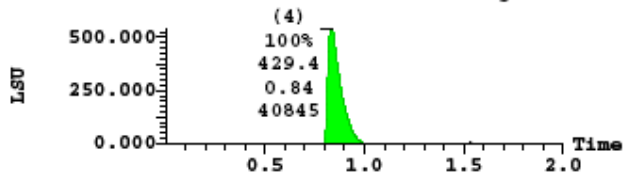

| Peak ID | Compound | Time | Mass Found |
|---------|----------|------|------------|
| 4       | Found    | 0.81 | 429.39     |

4: (Time: 0.81) 1:MS ES+  
8.0e+007

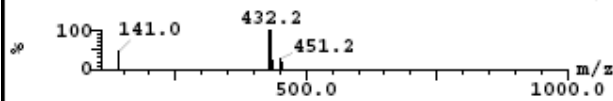

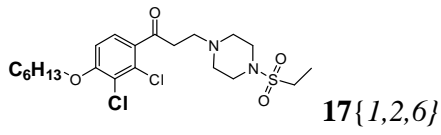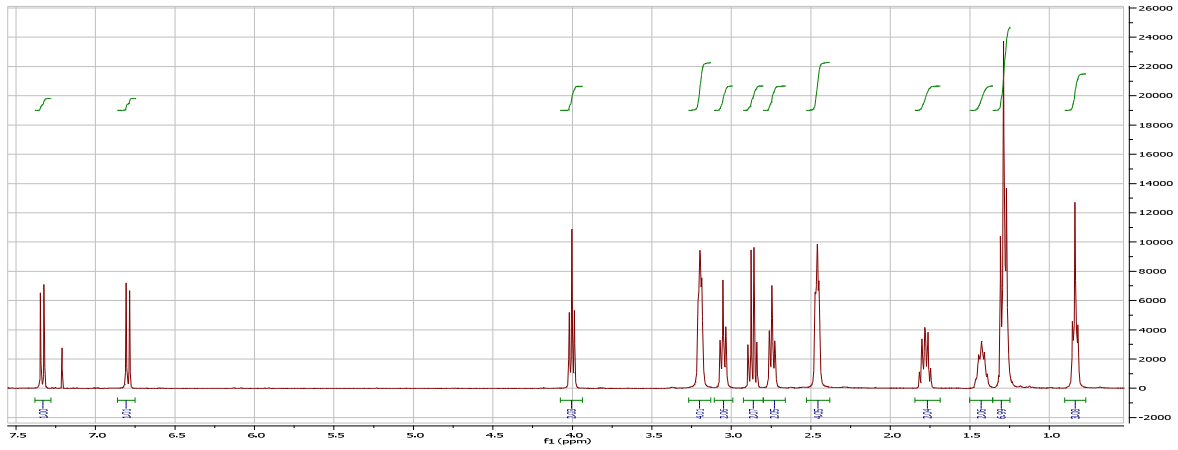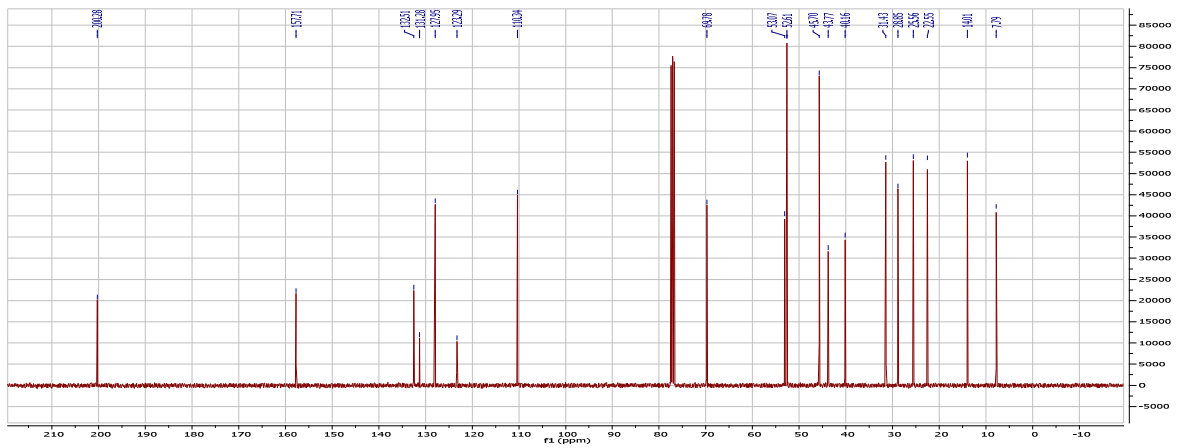

(1) ELSD Signal 673.807  
 Range: 673.793

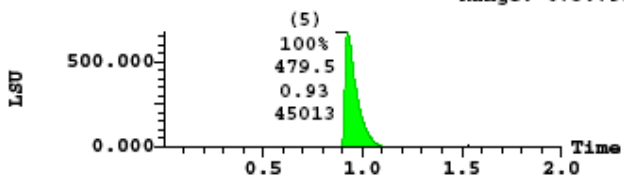

| Peak ID | Compound | Time | Mass Found |
|---------|----------|------|------------|
| 5       | Found    | 0.91 | 479.47     |

5: (Time: 0.91) 1:MS ES+  
6.4e+007

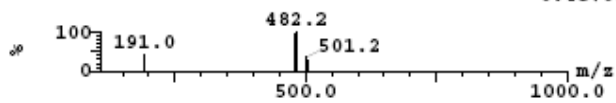

17{1,3,1} Same with 12{25}

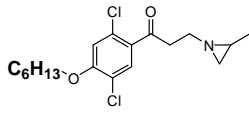

17{1,3,2}

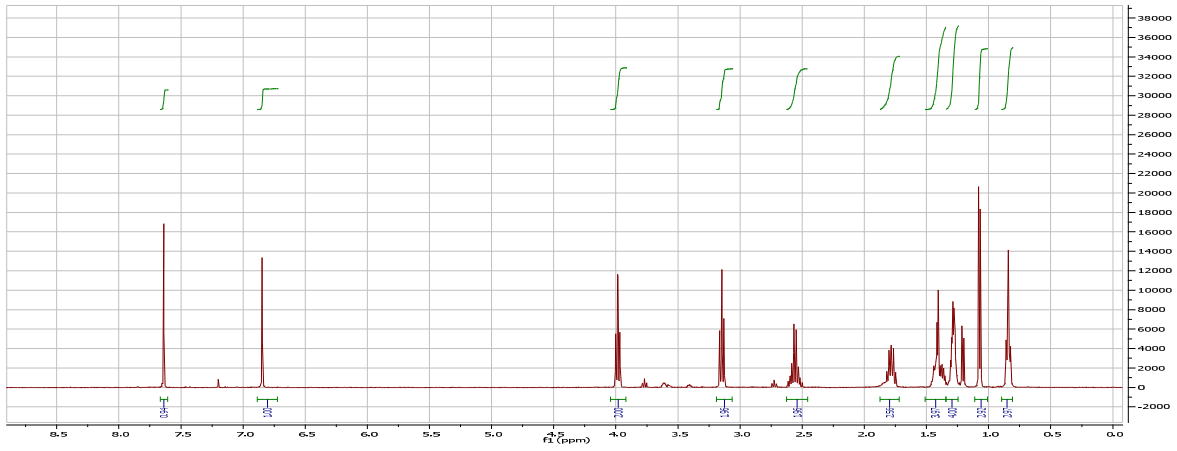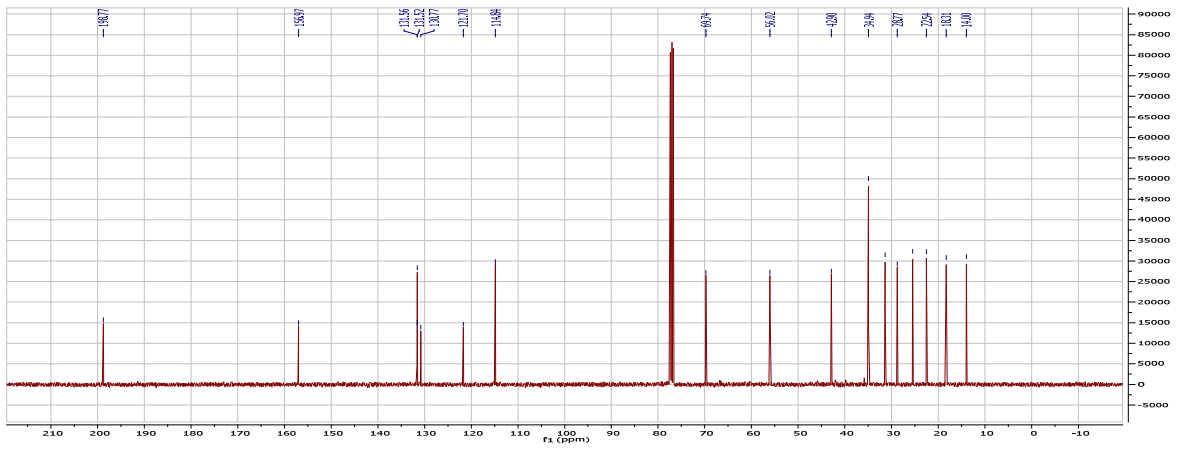

(1) ELSD Signal 363.422  
Range: 363.408

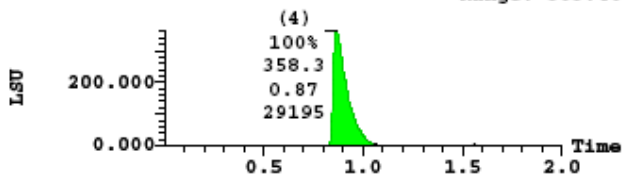

| Peak ID | Compound | Time | Mass Found |
|---------|----------|------|------------|
| 4       | Found    | 0.84 | 358.31     |

4: (Time: 0.84) 1:MS ES+  
9.6e+007

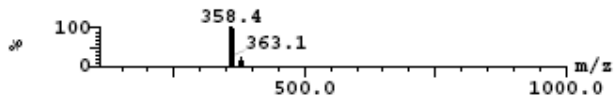

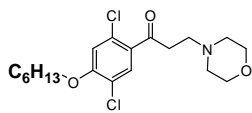

17{1,3,3}

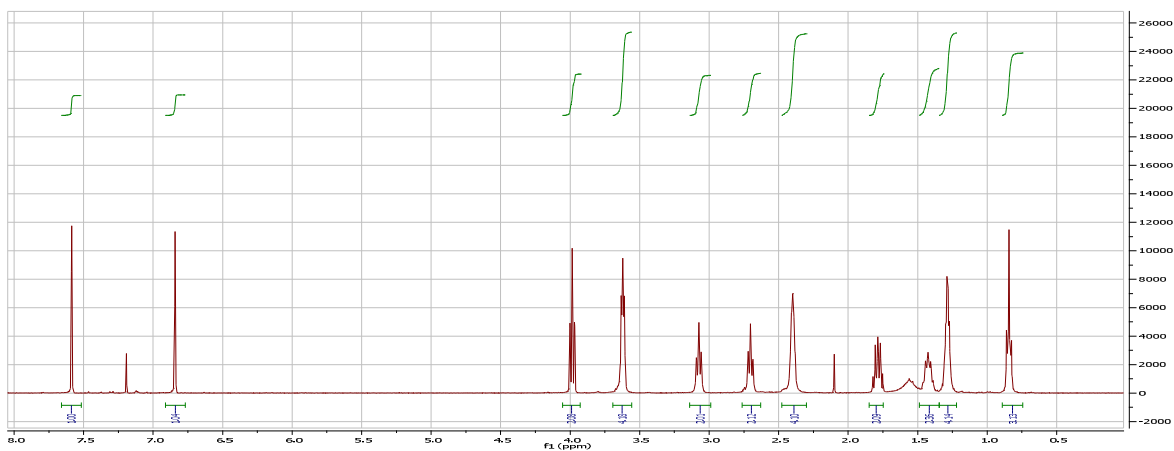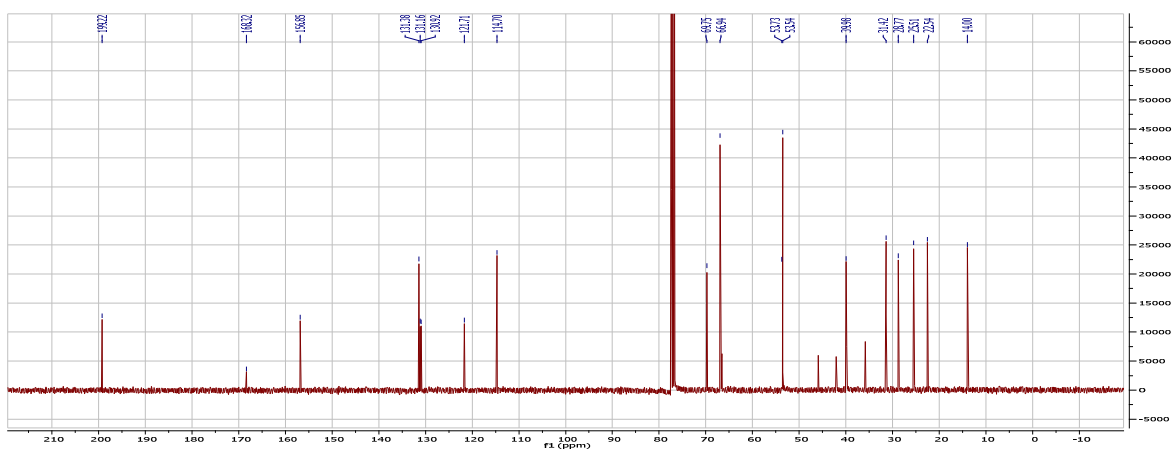

(1) ELSD Signal 439.841  
Range: 439.836

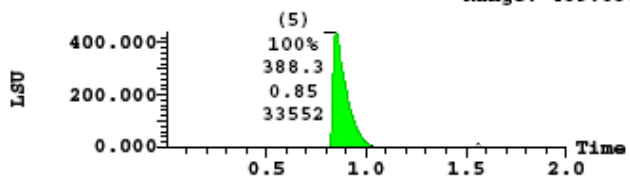

| Peak ID | Compound | Time | Mass Found |
|---------|----------|------|------------|
| 5       | Found    | 0.83 | 388.34     |

5: (Time: 0.83) 1:MS ES+  
8.1e+007

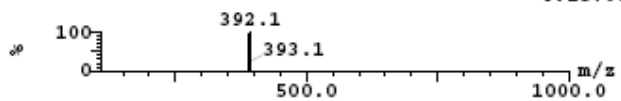

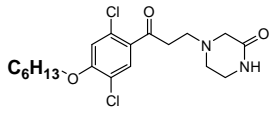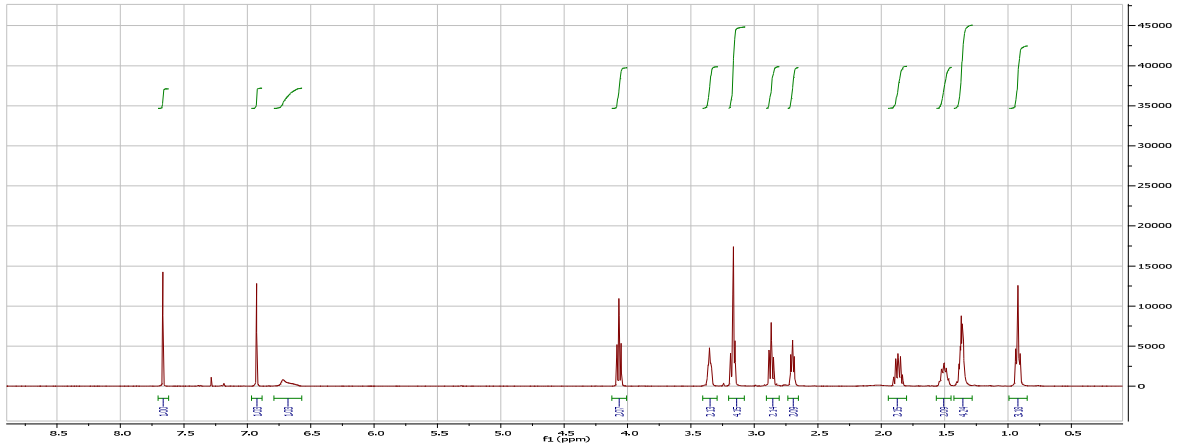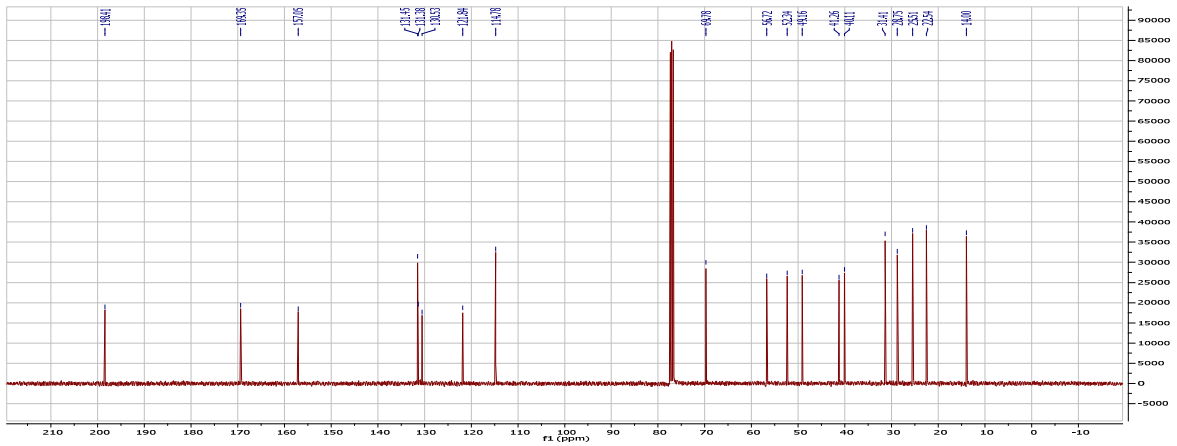

(1) ELSD Signal 1684.140  
 Range: 1684.123

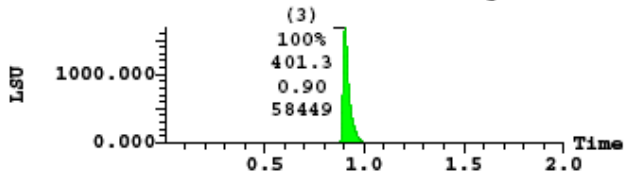

| Peak ID | Compound | Time | Mass Found |
|---------|----------|------|------------|
| 3       | Found    | 0.89 | 401.33     |

3: (Time: 0.89) 1:MS ES+  
8.4e+007

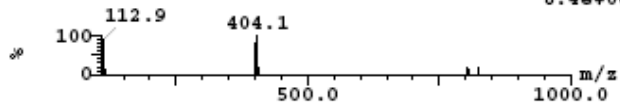

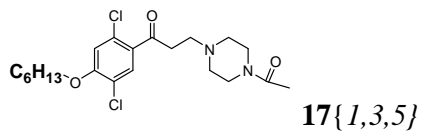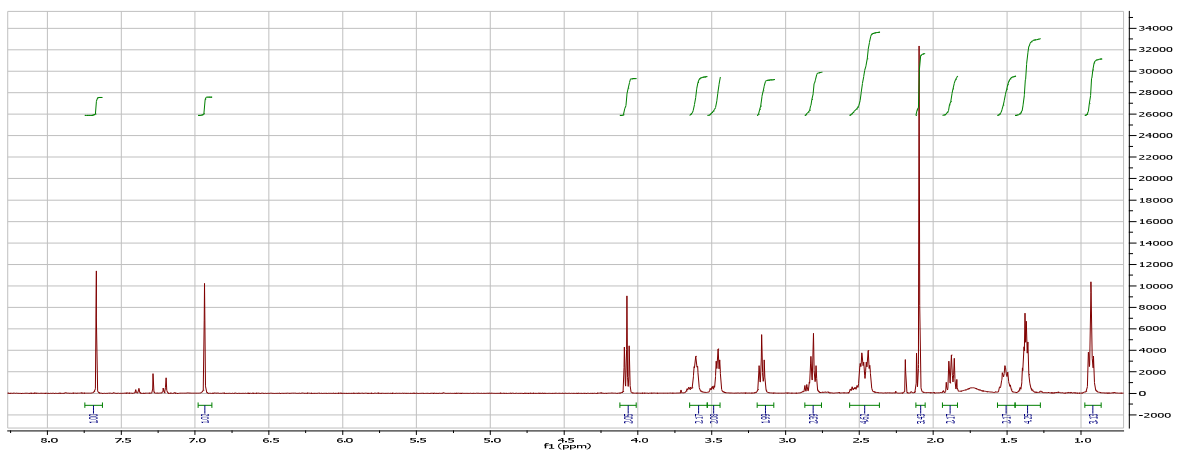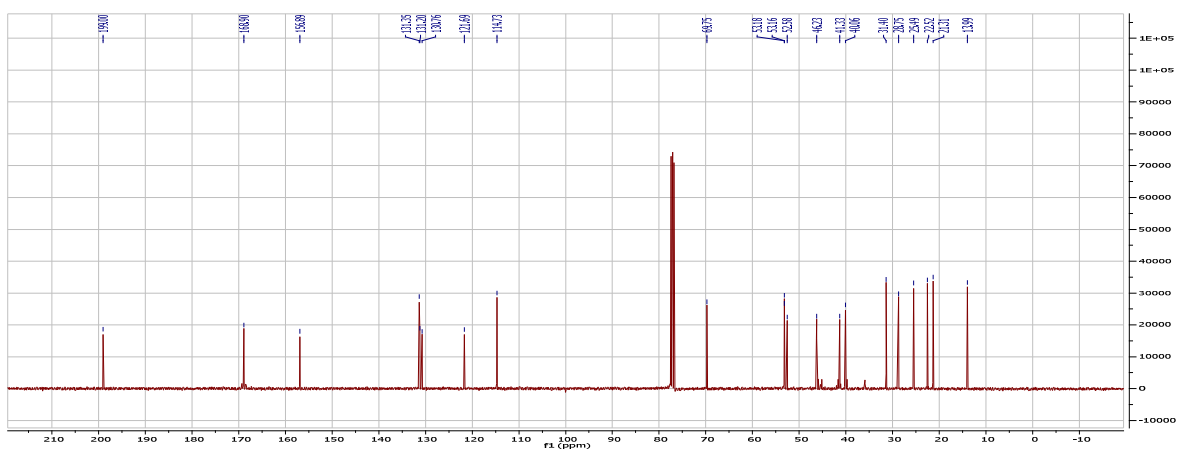

(1) ELSD Signal 498.296  
 Range: 498.291

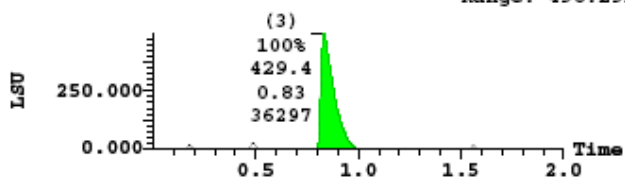

| Peak ID | Compound | Time | Mass Found |
|---------|----------|------|------------|
| 5       | Found    | 0.89 | 429.39     |

5: (Time: 0.89) 1:MS ES+  
6.6e+007

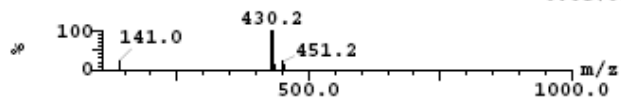



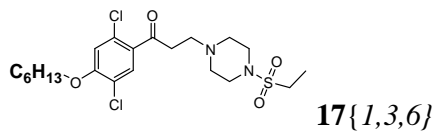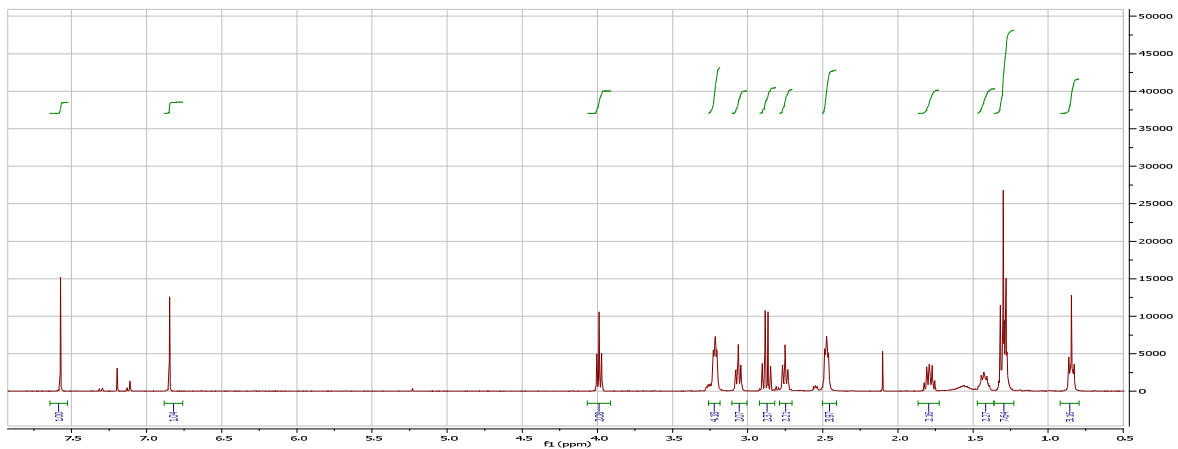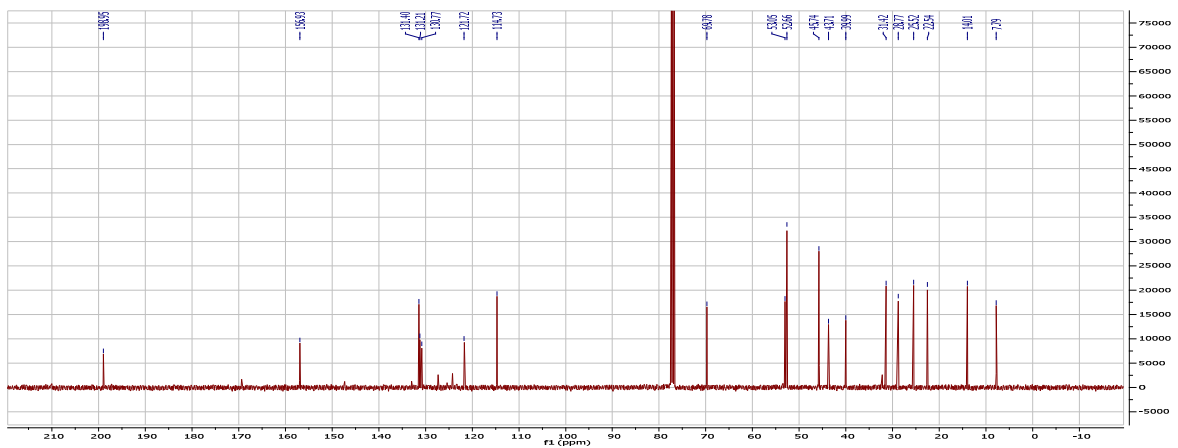

(1) ELSD Signal 670.705  
 Range: 670.685

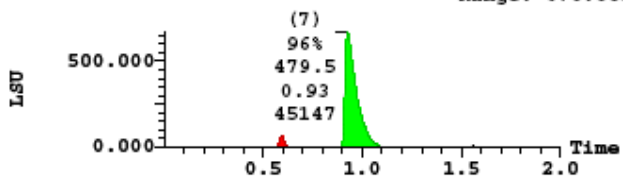

| Peak ID | Compound | Time | Mass Found |
|---------|----------|------|------------|
| 8       | Found    | 0.97 | 479.47     |

8: (Time: 0.97) 1:MS ES+  
7.3e+007

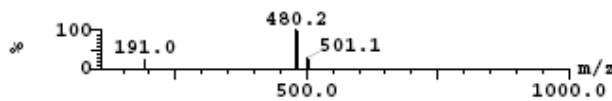

17{1,4,1} Same with 12{26}

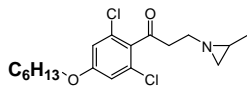

17{1,4,2}

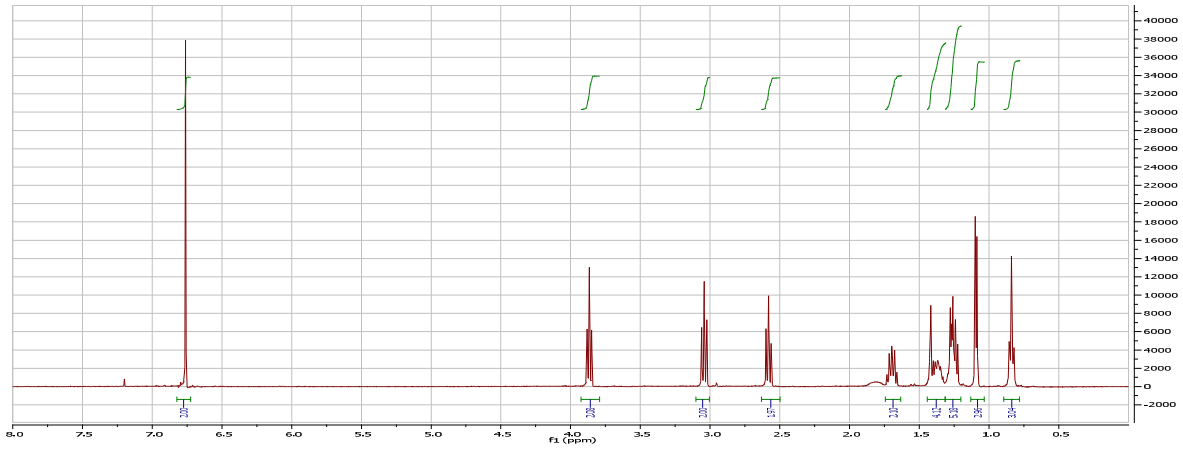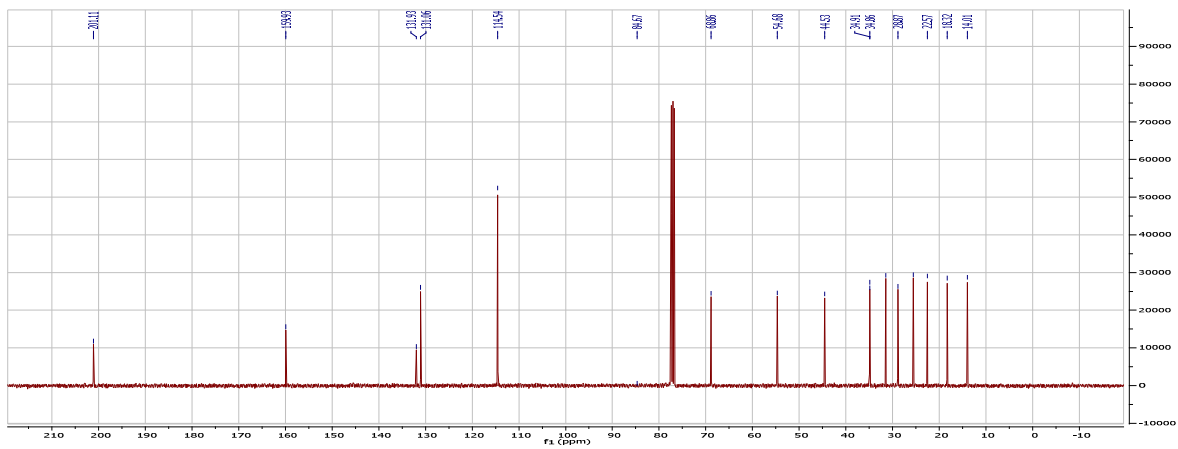

(1) ELSD Signal 319.277  
 Range: 319.252

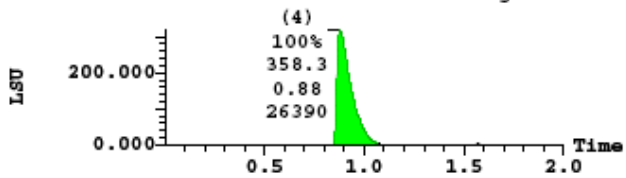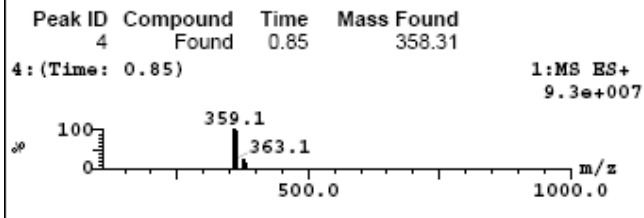

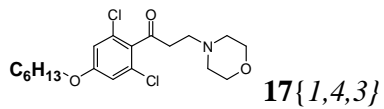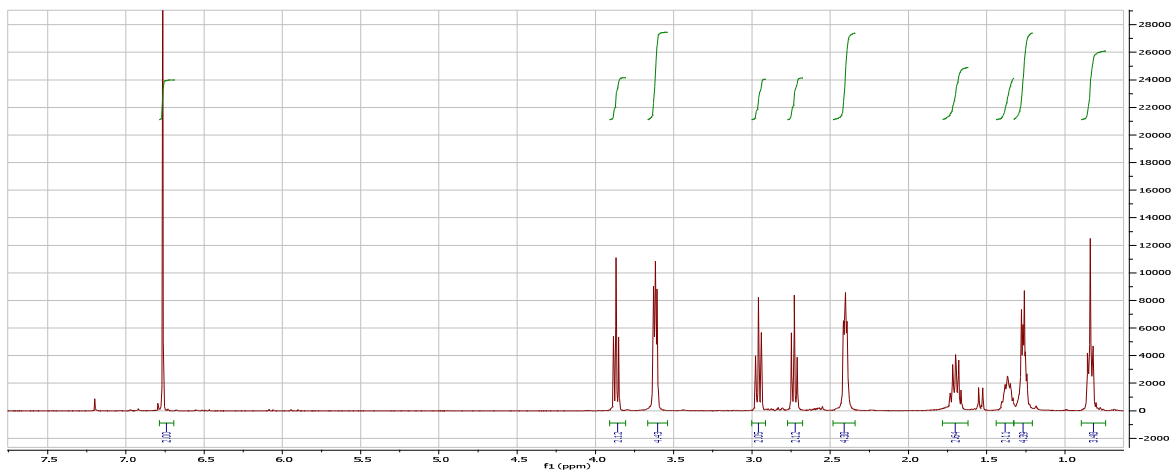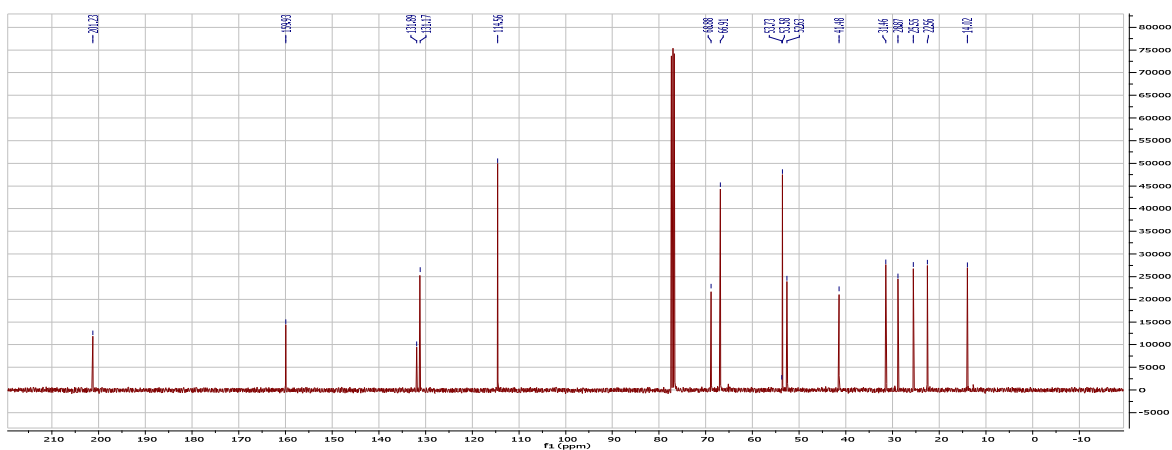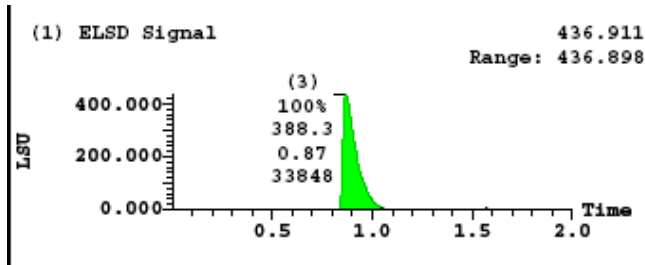

| Peak ID | Compound Found | Time | Mass Found |
|---------|----------------|------|------------|
| 3       | Found          | 0.84 | 388.34     |

1:MS ES+  
7.3e+007

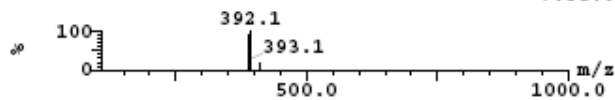

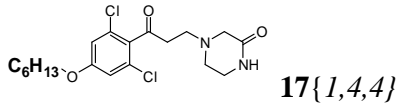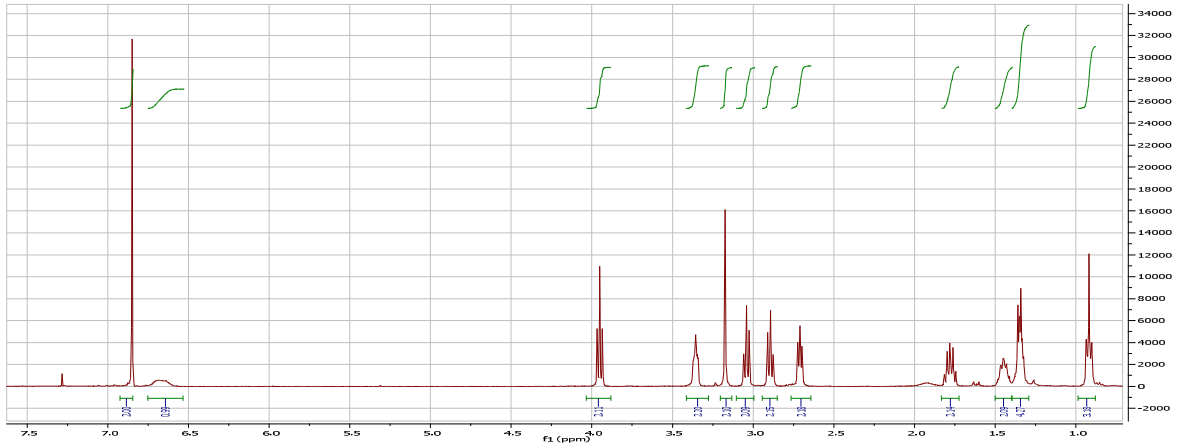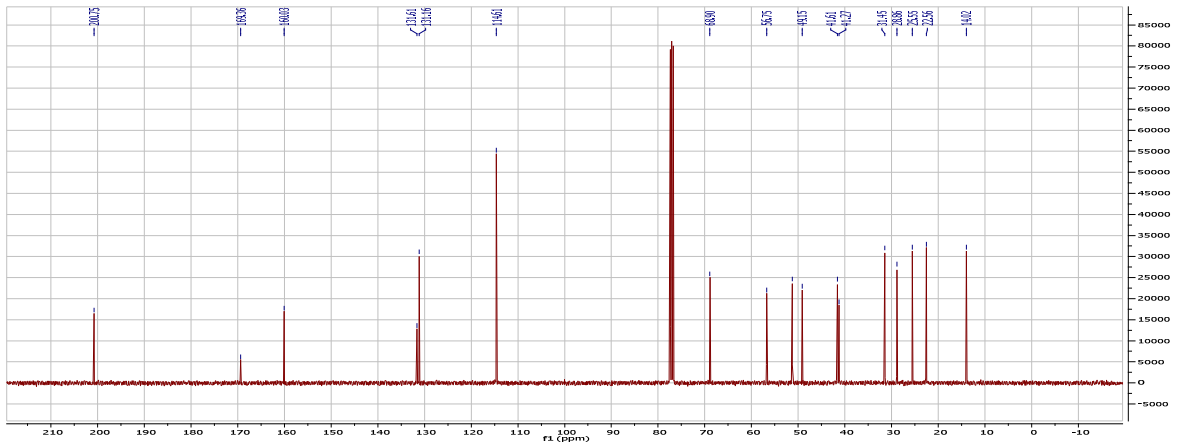

(1) ELSD Signal 1747.322  
Range: 1747.305

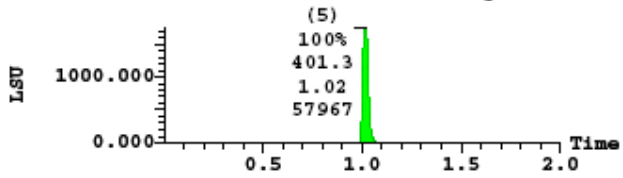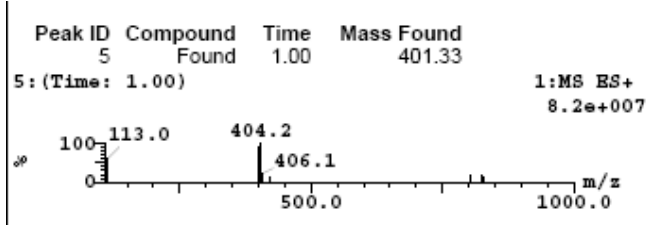

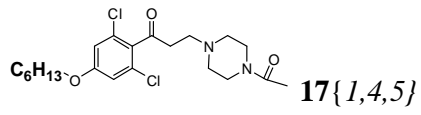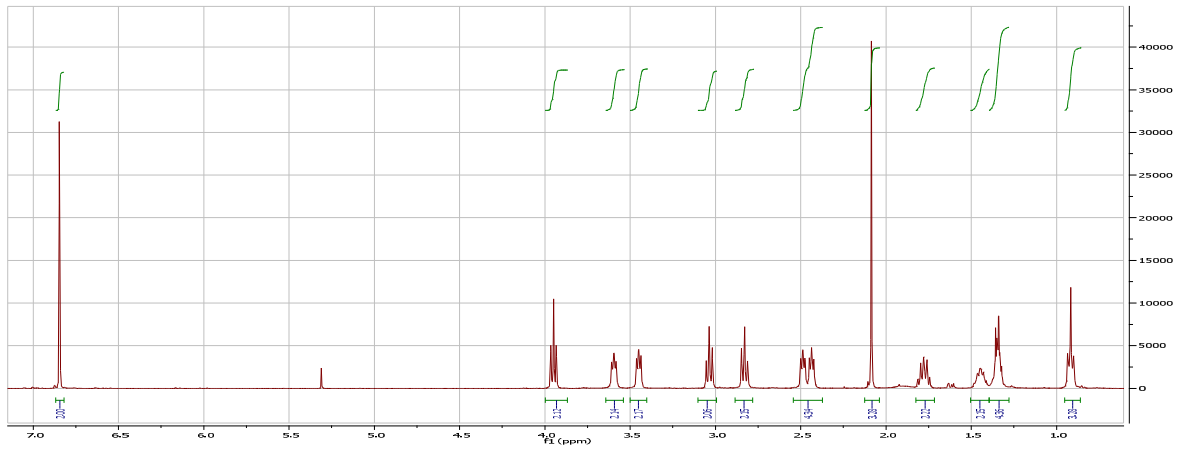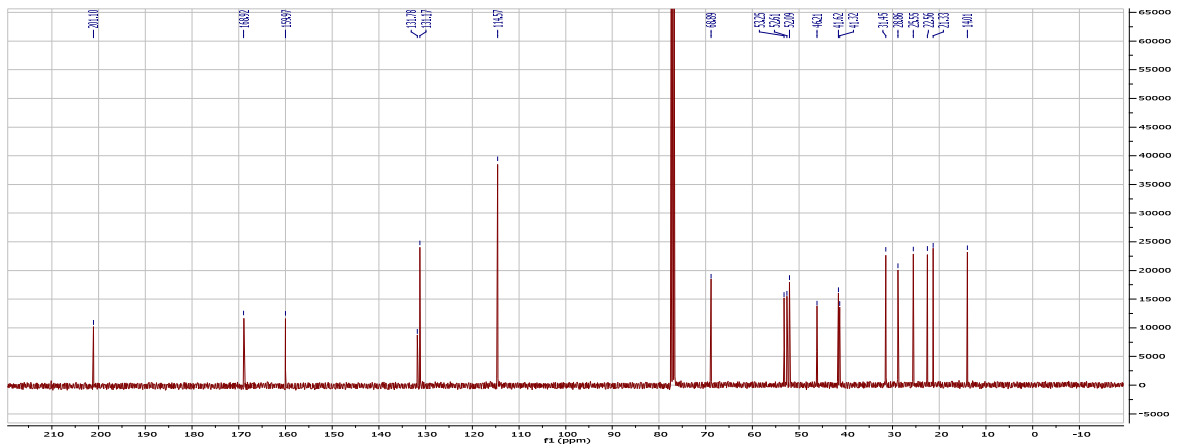

(1) ELSD Signal 625.483  
Range: 625.458

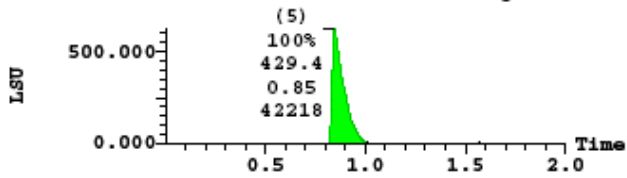

| Peak ID | Compound | Time | Mass Found |
|---------|----------|------|------------|
| 5       | Found    | 0.83 | 429.39     |

5: (Time: 0.83) 1:MS ES+ 1.0e+008

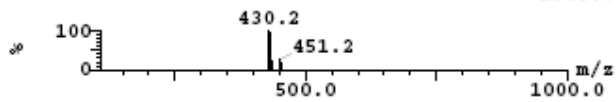

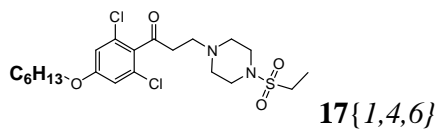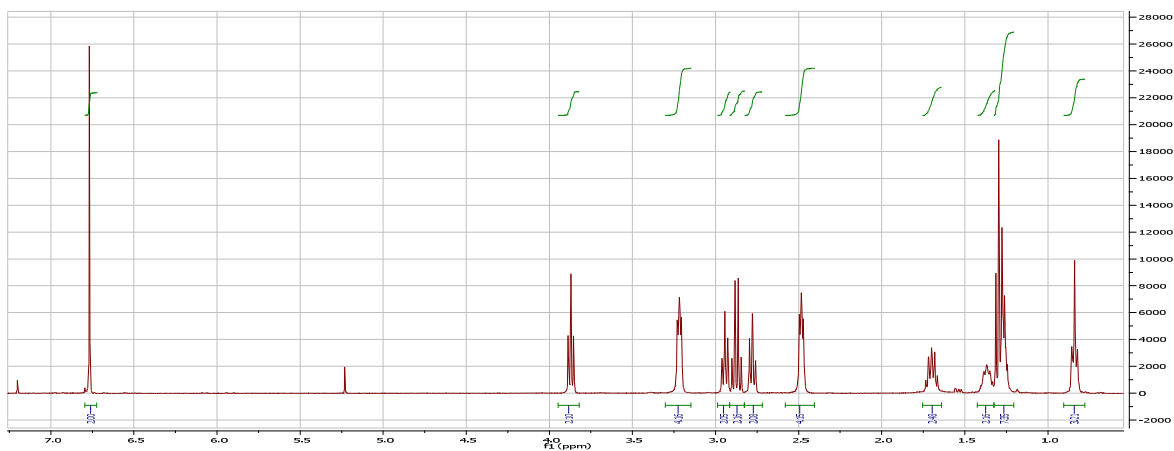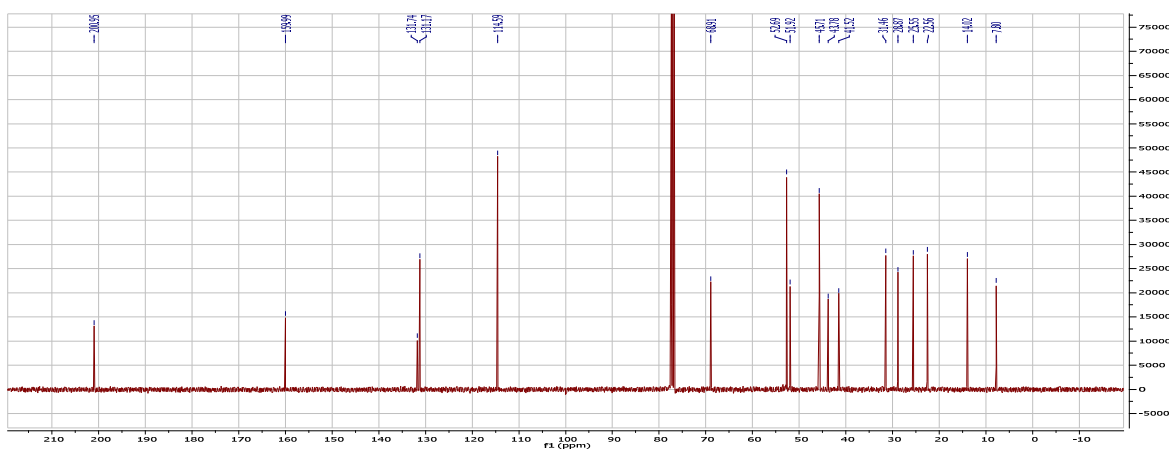

(1) ELSD Signal

846.584

Range: 846.541

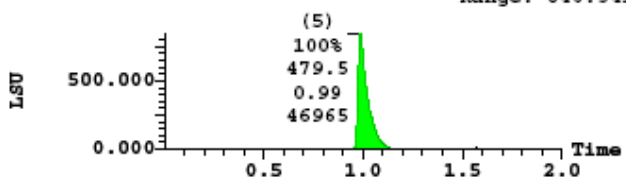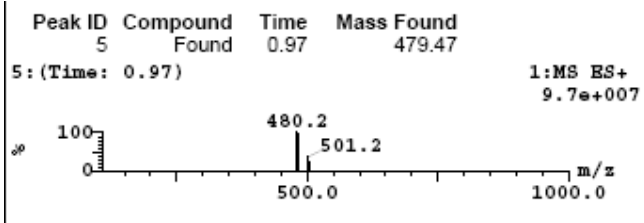

17{1,5,1} Same with 12{22}

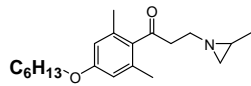

17{1,5,2}

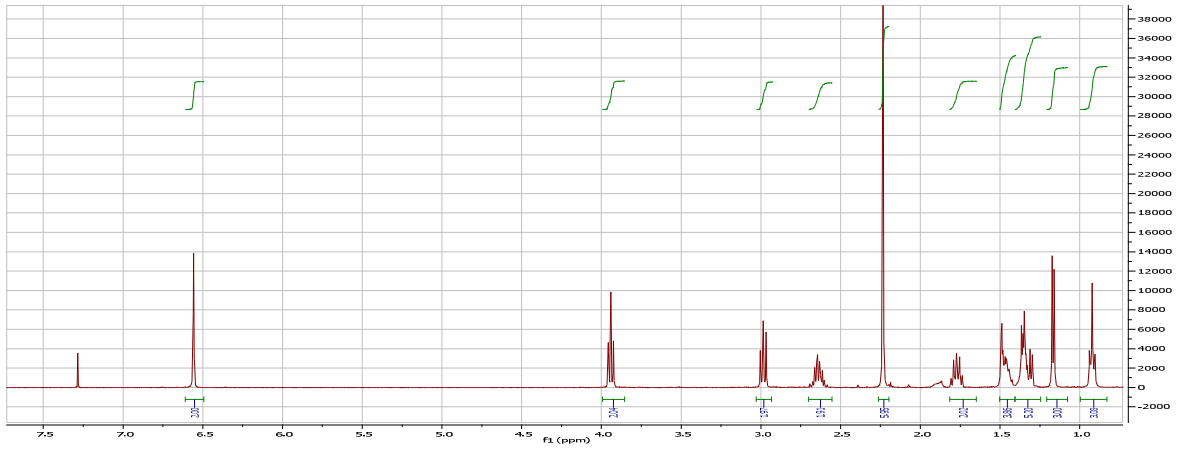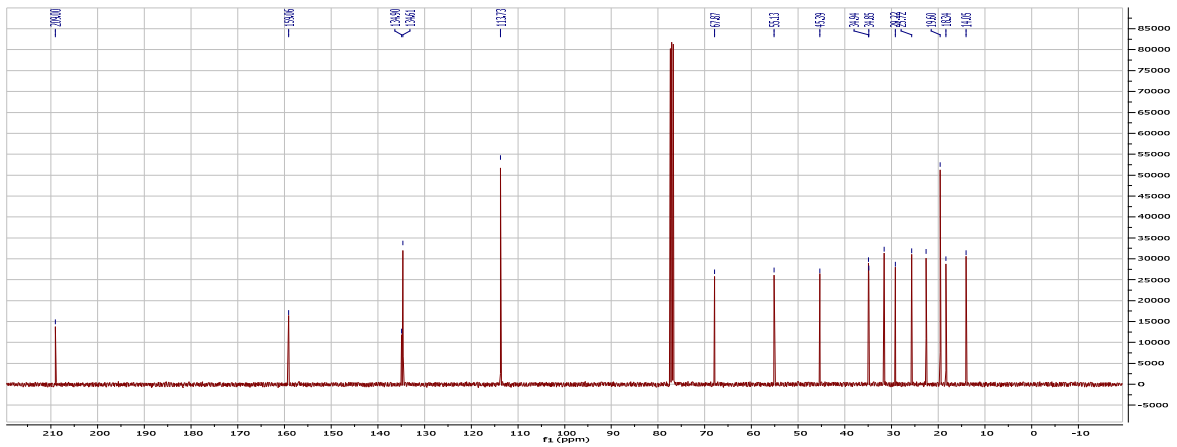

(1) ELSD Signal

79.395

Range: 79.364

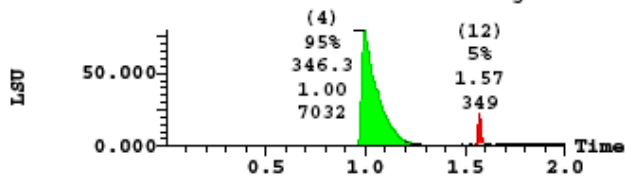

| Peak ID | Compound | Time | Mass Found |
|---------|----------|------|------------|
| 4       | Found    | 0.97 | 346.30     |

4: (Time: 0.97) 1:MS ES+ 3.5e+007

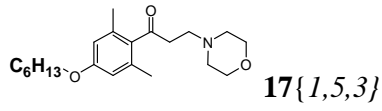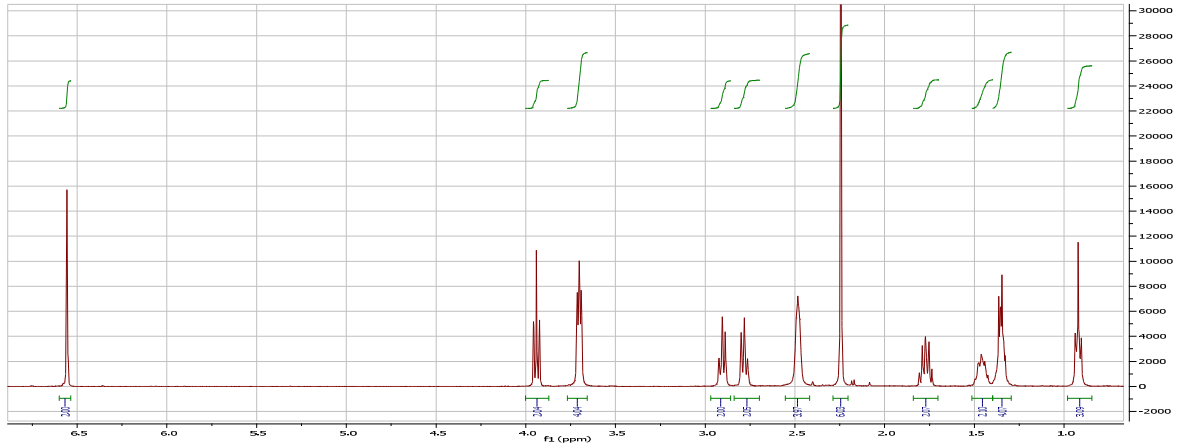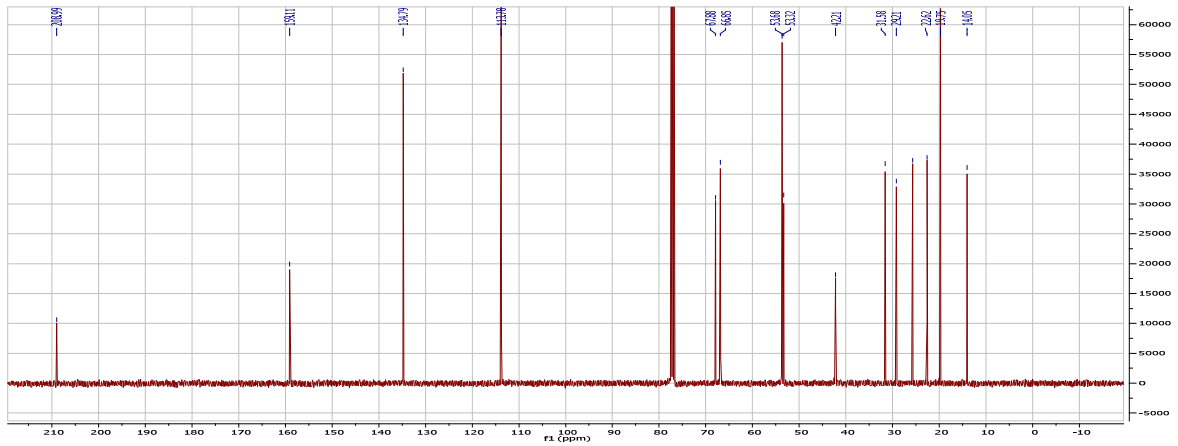

(1) ELSD Signal

443.455

Range: 443.433

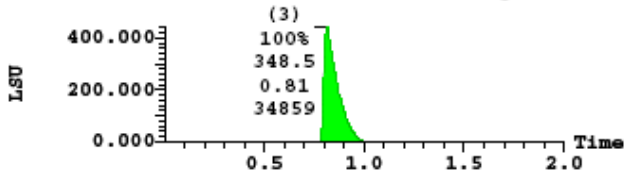

| Peak ID | Compound | Time | Mass Found |
|---------|----------|------|------------|
| 3       | Found    | 0.79 | 348.50     |

3: (Time: 0.79) 1:MS ES+ 9.5e+007

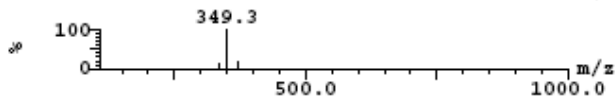



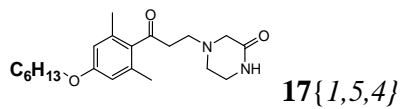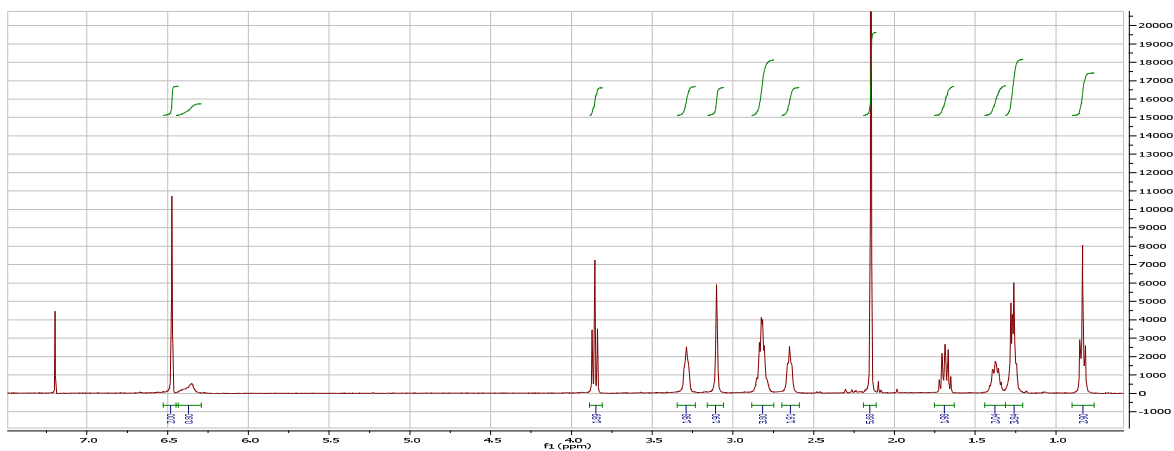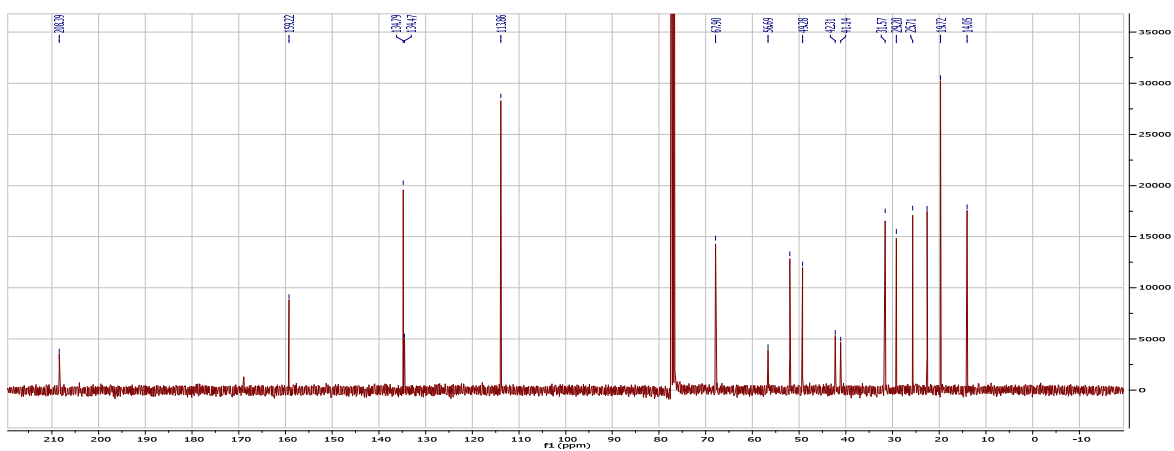

(1) ELSD Signal 1084.732  
Range: 1084.710

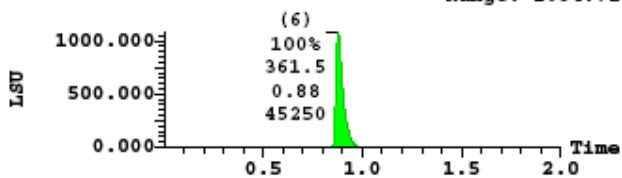

| Peak ID | Compound | Time | Mass Found |
|---------|----------|------|------------|
| 6       | Found    | 0.86 | 361.50     |

6: (Time: 0.86) 1:MS ES+  
8.7e+007

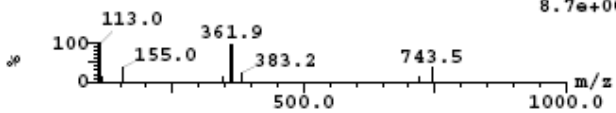

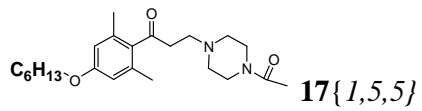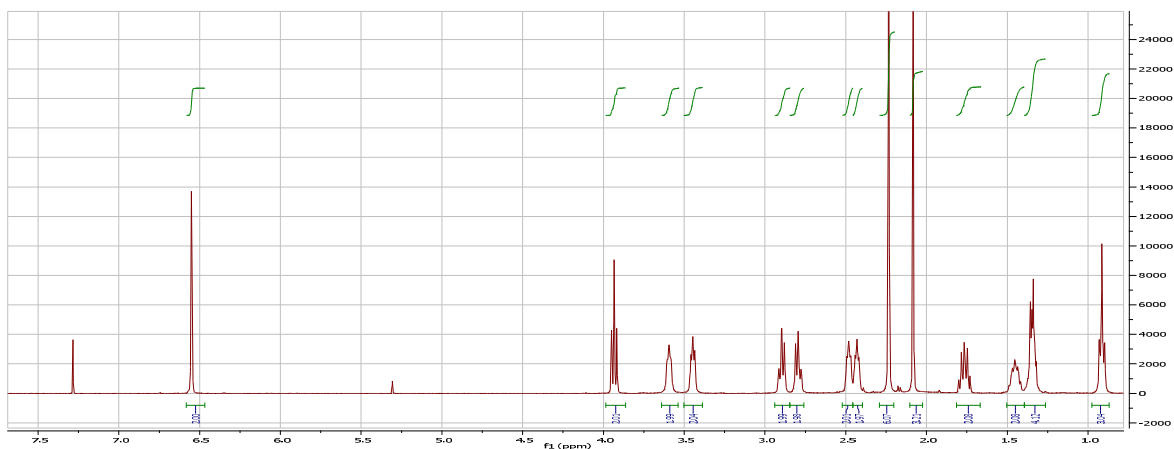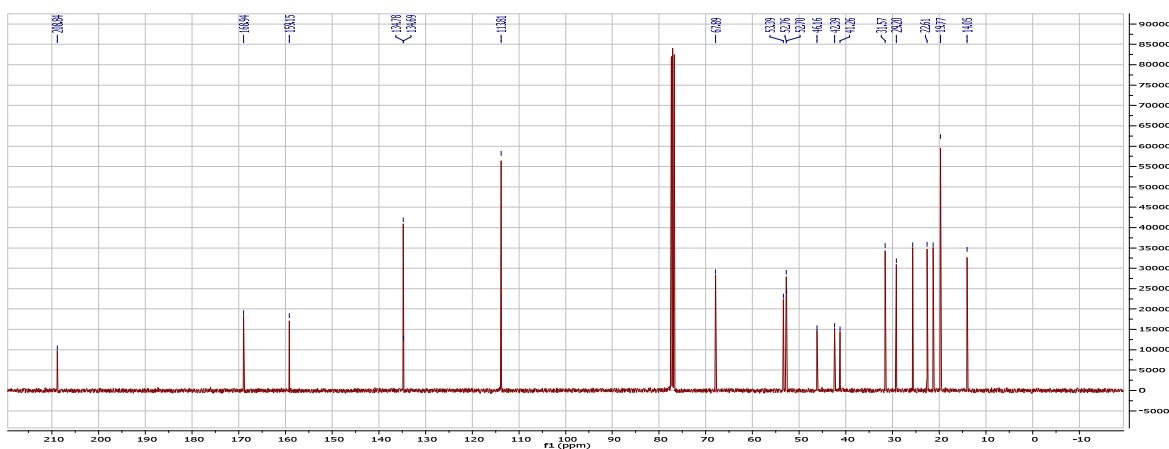

(1) ELSD Signal

552.602

Range: 552.596

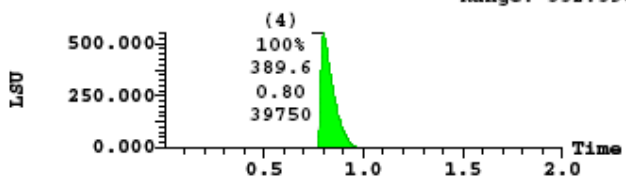

| Peak ID | Compound | Time | Mass Found |
|---------|----------|------|------------|
| 4       | Found    | 0.78 | 389.55     |

4: (Time: 0.78) 1:MS ES+ 1.0e+008

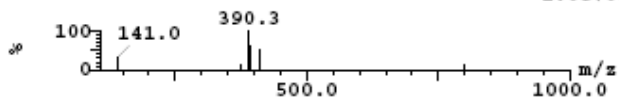

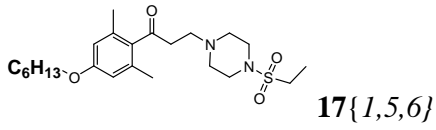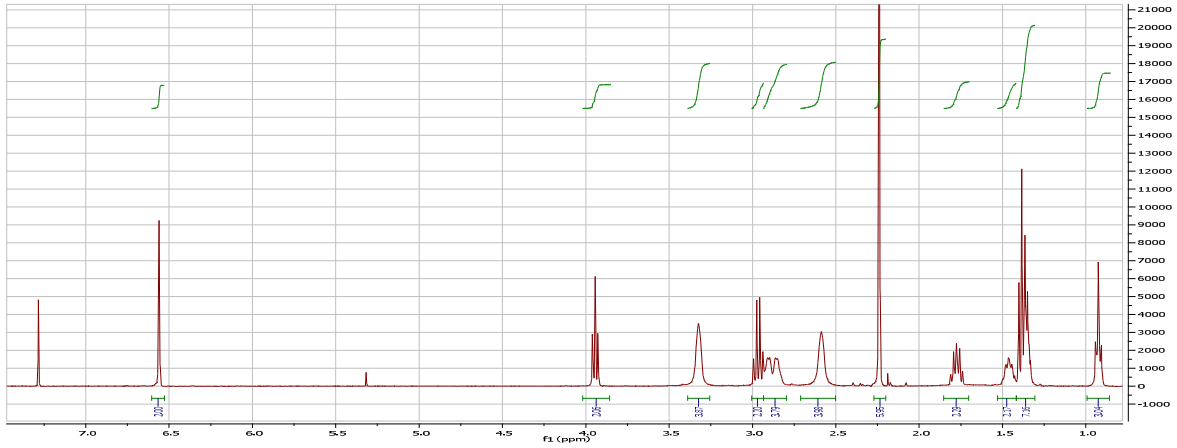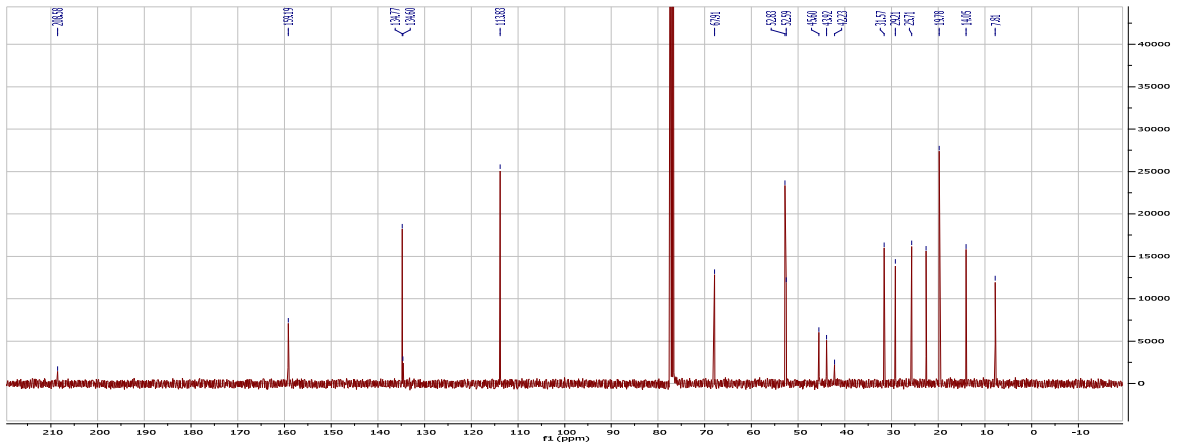

(1) ELSD Signal 749.914  
 Range: 749.907

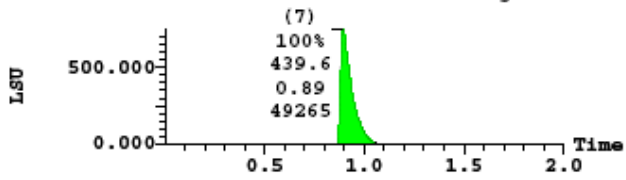

| Peak ID | Compound | Time | Mass Found |
|---------|----------|------|------------|
| 7       | Found    | 0.87 | 439.63     |

7: (Time: 0.87) 1:MS ES+  
6.4e+007

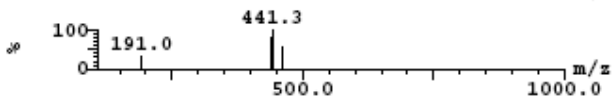

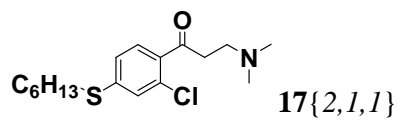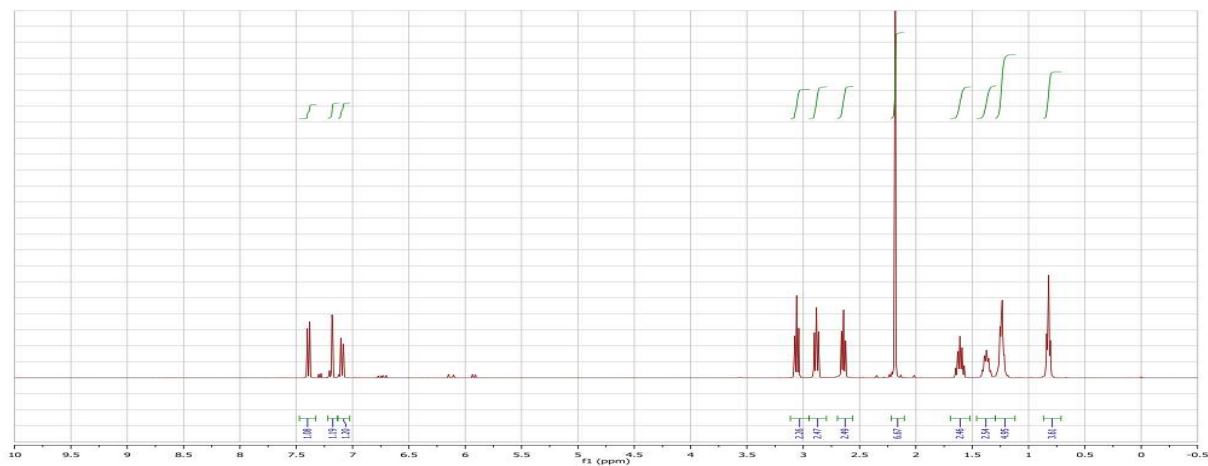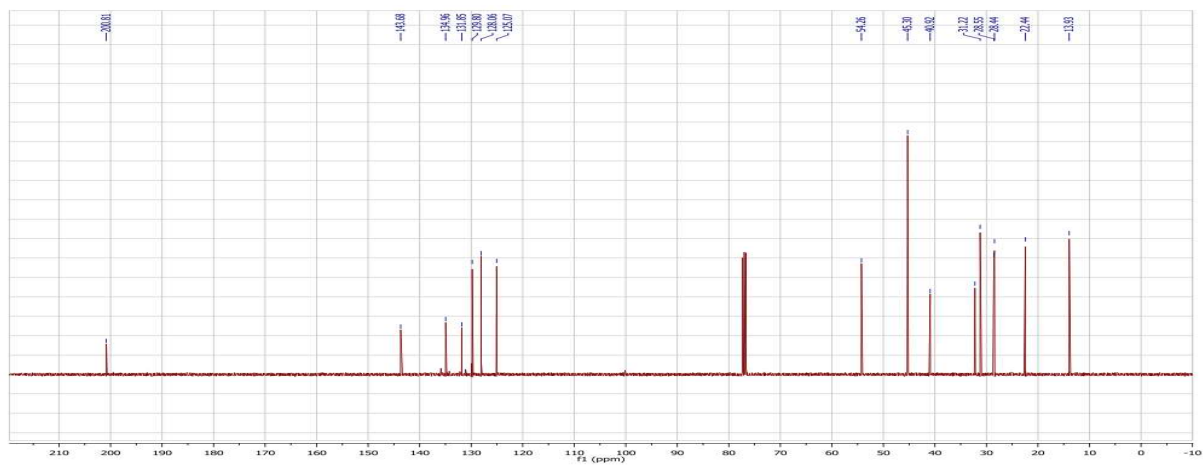

(1) ELSD Signal

73.590  
Range: 73.565

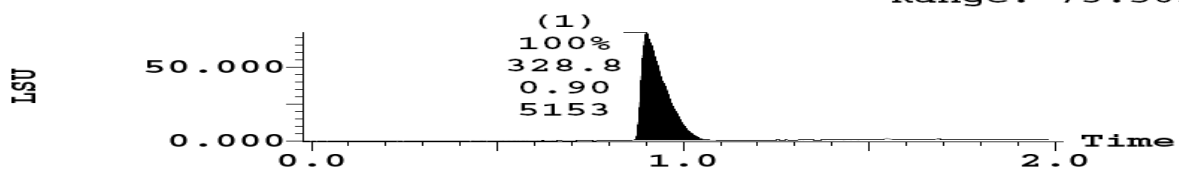

| Peak ID | Compound | Time | Mass Found |
|---------|----------|------|------------|
| 1       | Found    | 0.90 | 328.81     |

1: (Time: 0.90)

1:MS ES+  
1.1e+008

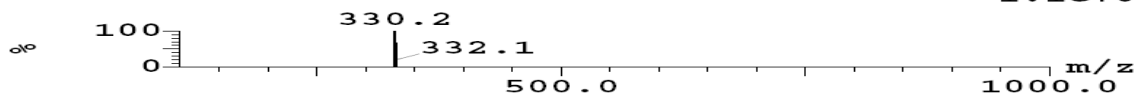

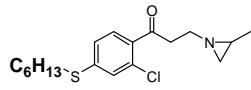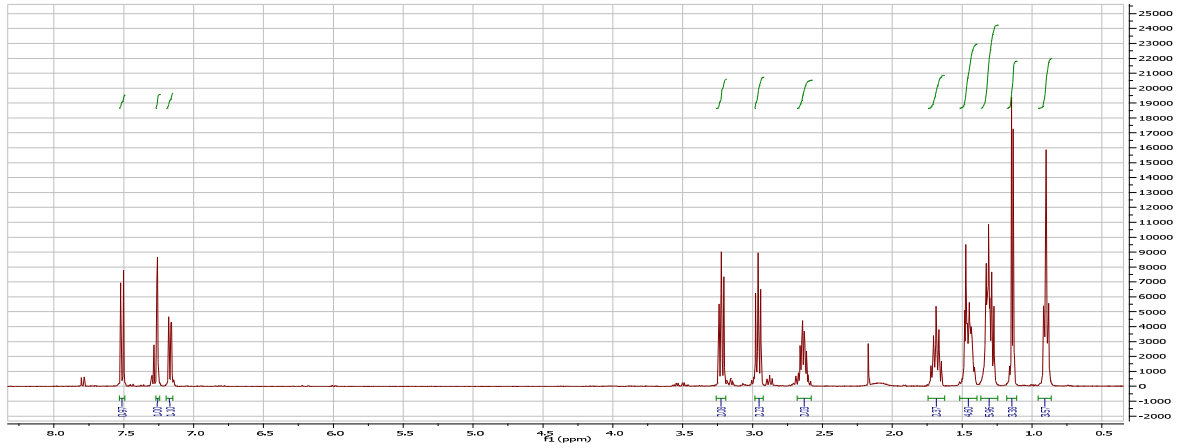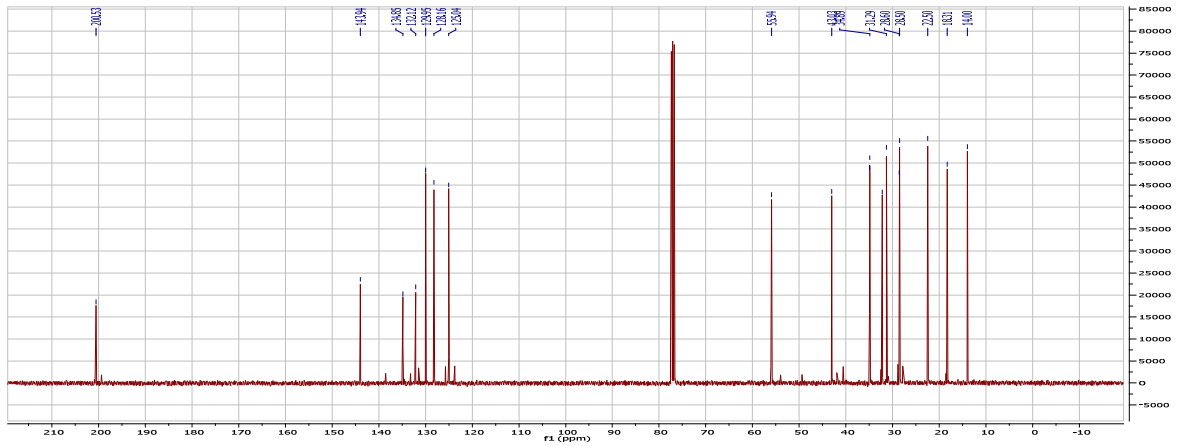

(1) ELSD Signal 343.447  
 Range: 343.444

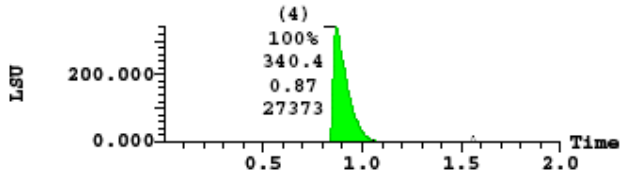

| Peak ID | Compound | Time | Mass Found |
|---------|----------|------|------------|
| 4       | Found    | 0.84 | 340.43     |

4: (Time: 0.84) 1:MS ES+  
8.9e+007

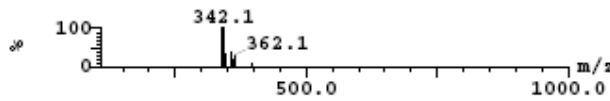

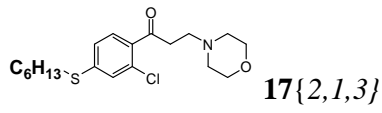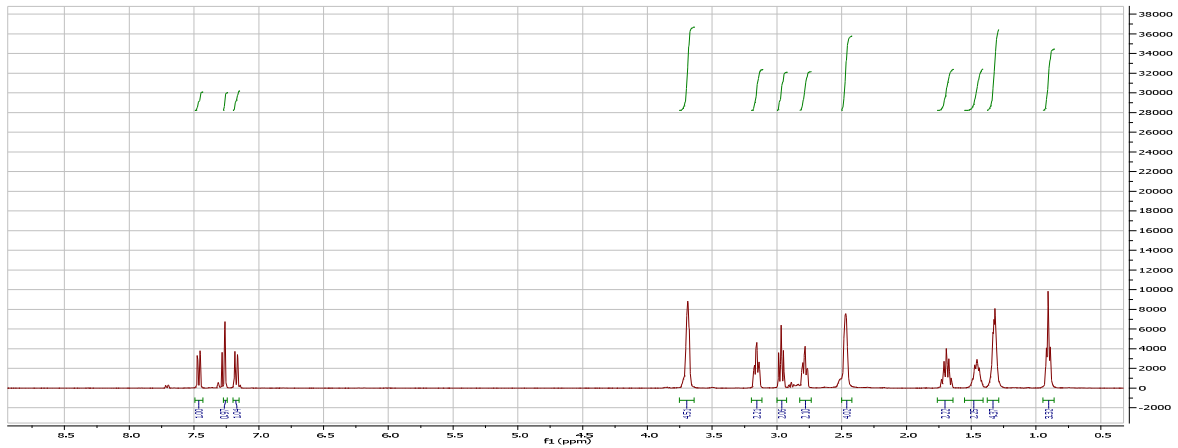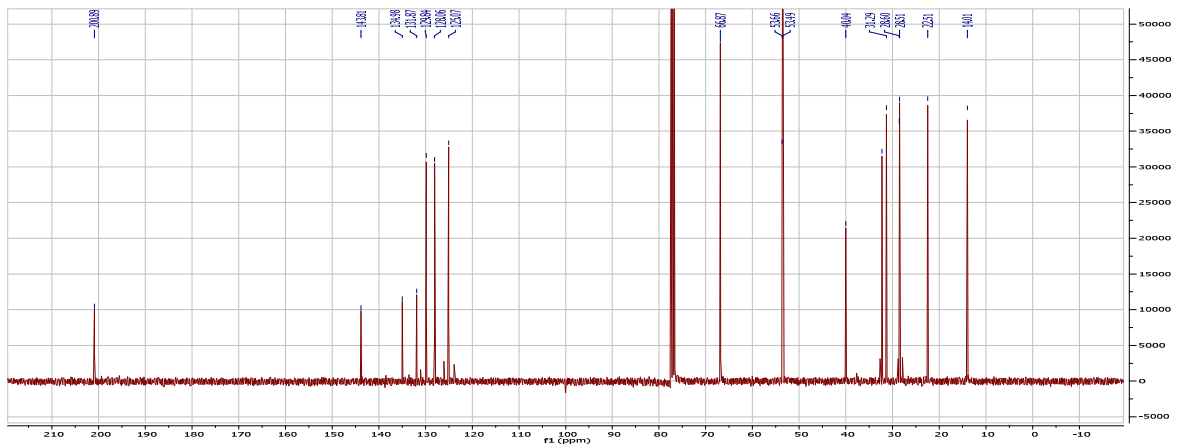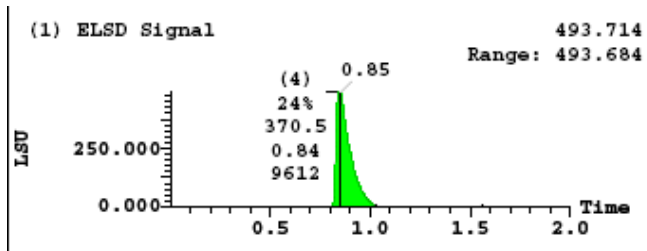

| Peak ID | Compound | Time | Mass Found |
|---------|----------|------|------------|
| 4       | Found    | 0.82 | 370.46     |

4: (Time: 0.82) 1:MS ES+  
1.0e+008

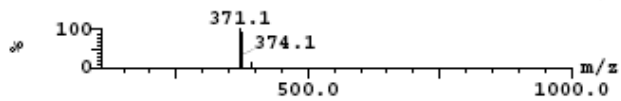

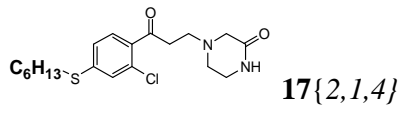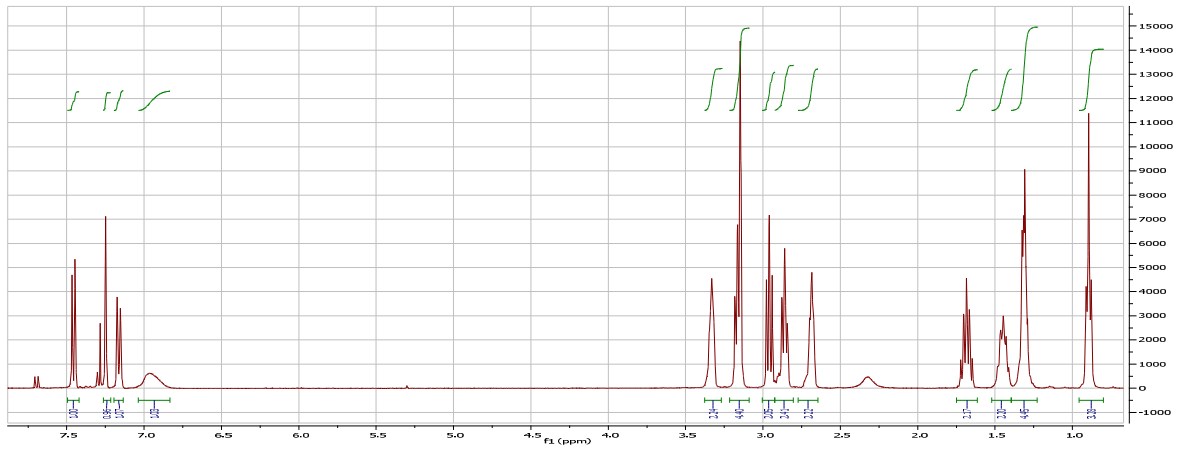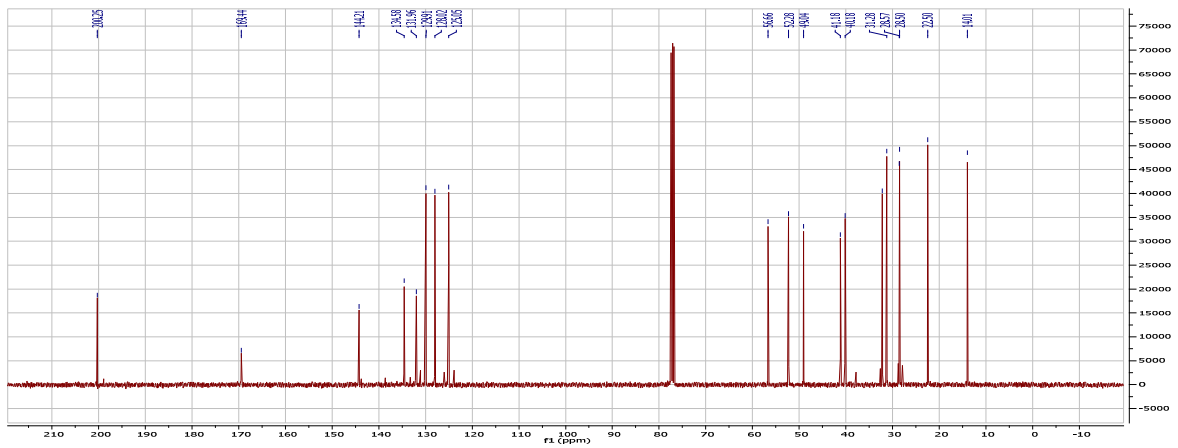

(1) ELSD Signal 1642.389  
 Range: 1642.373

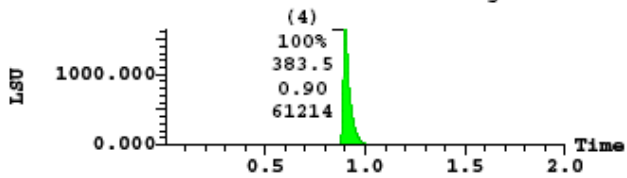

| Peak ID | Compound | Time | Mass Found |
|---------|----------|------|------------|
| 4       | Found    | 0.88 | 383.46     |

4: (Time: 0.88) 1:MS ES+  
7.9e+007

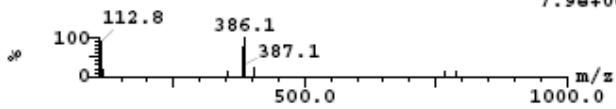

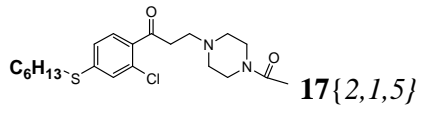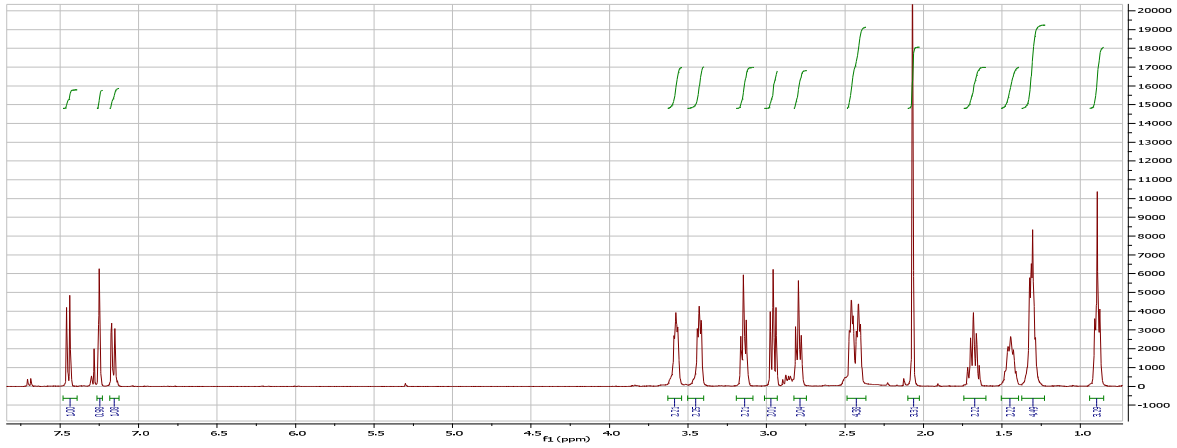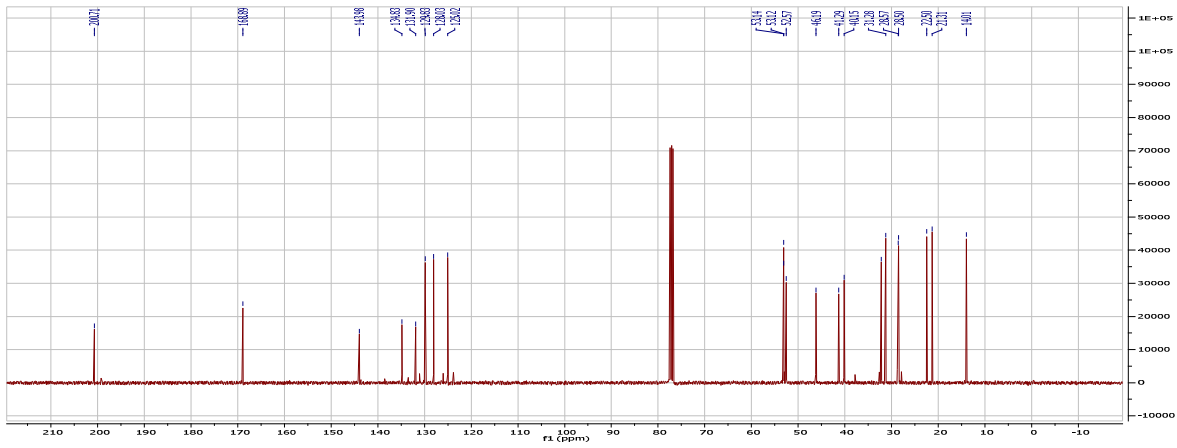

(1) ELSD Signal 687.943  
 Range: 687.936

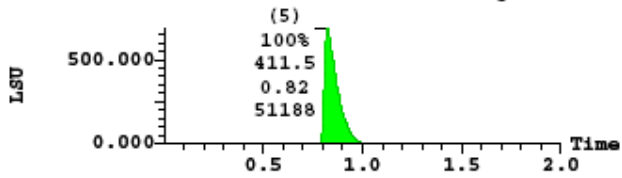

| Peak ID | Compound | Time | Mass Found |
|---------|----------|------|------------|
| 6       | Found    | 0.83 | 411.51     |

6: (Time: 0.83) 1:MS ES+  
1.3e+008

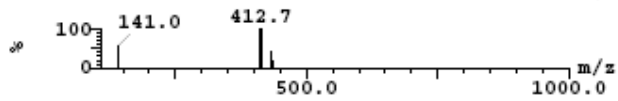



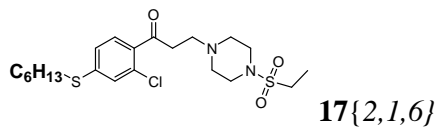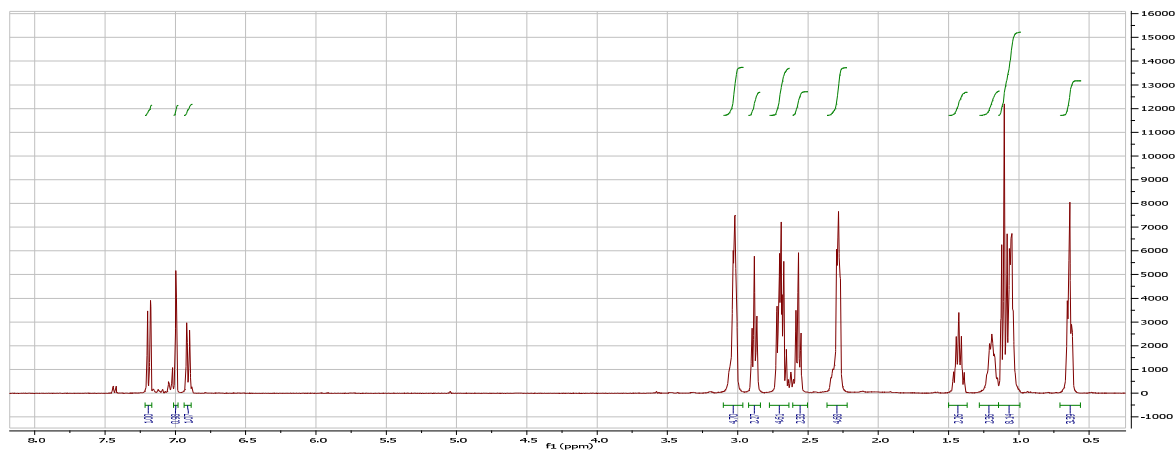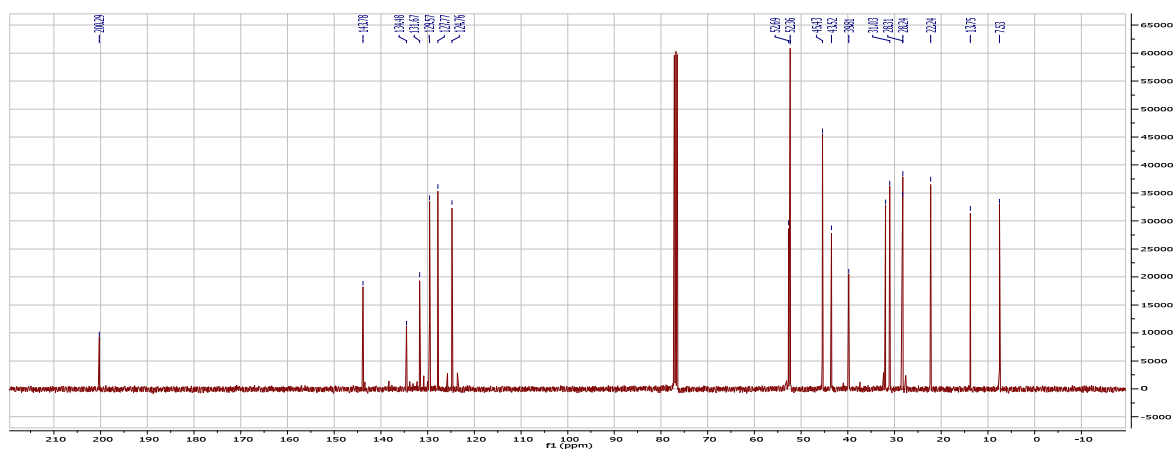

(1) ELSD Signal 651.623  
Range: 651.616

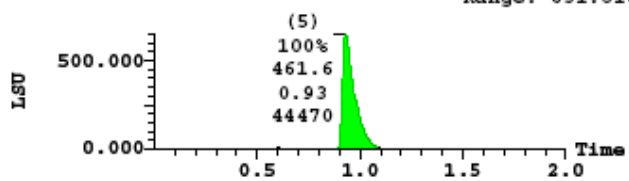

| Peak ID | Compound | Time | Mass Found |
|---------|----------|------|------------|
| 5       | Found    | 0.90 | 461.59     |

5: (Time: 0.90) 1:MS ES+ 9.4e+007

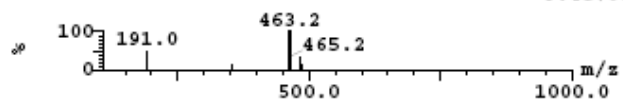

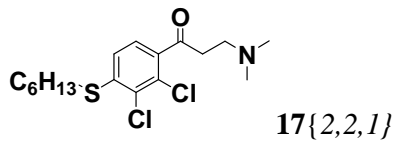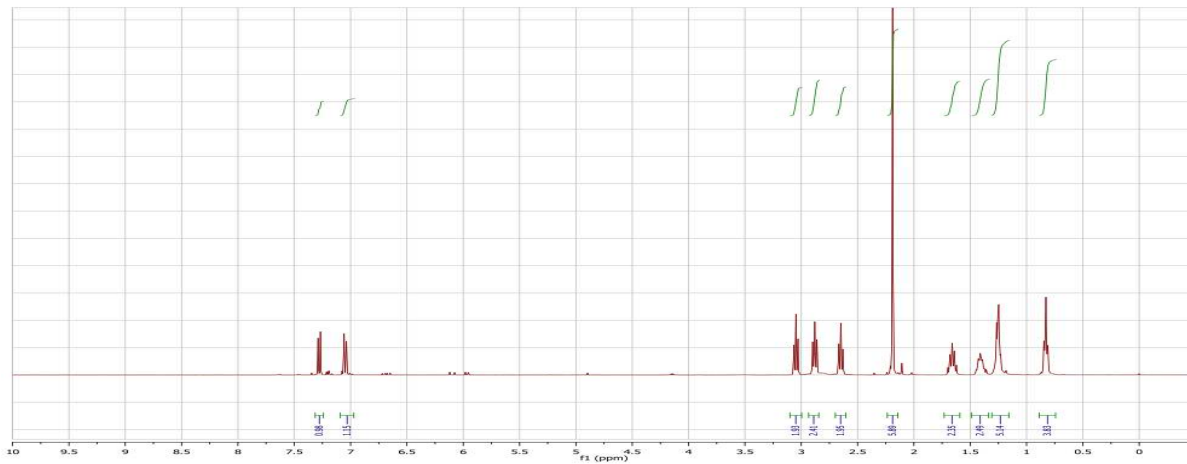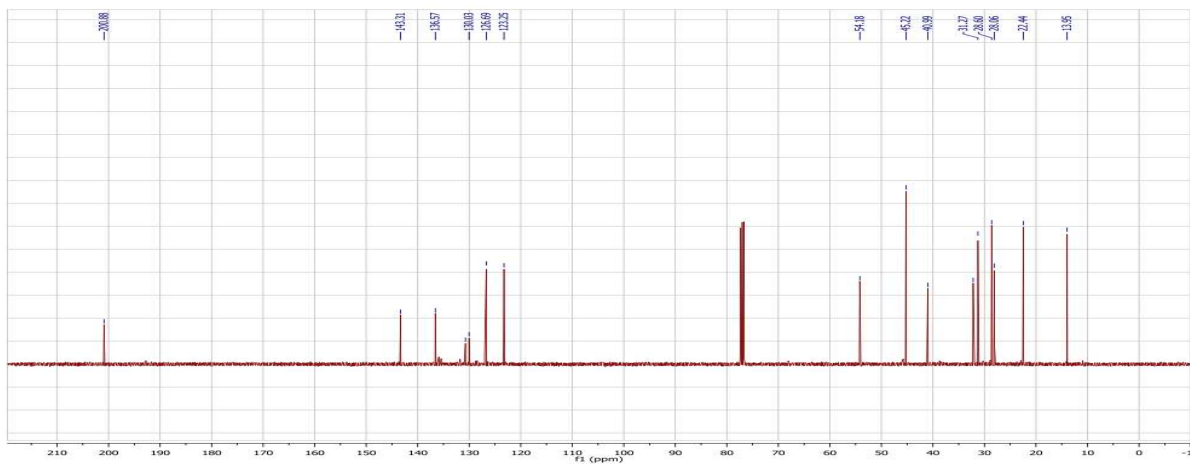

(1) ELSD Signal

84.951  
Range: 84.905

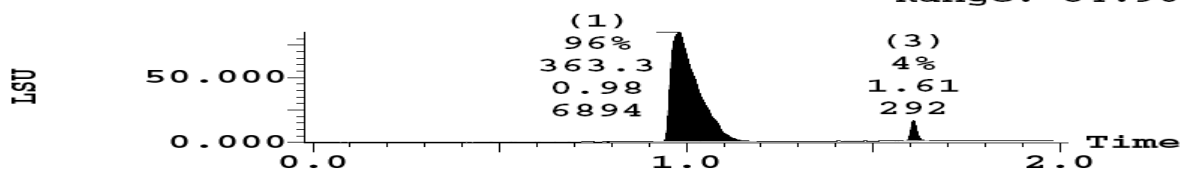

| Peak ID | Compound | Time | Mass Found |
|---------|----------|------|------------|
| 1       | Found    | 0.99 | 363.26     |

1: (Time: 0.99)

1: MS ES+  
1.1e+008

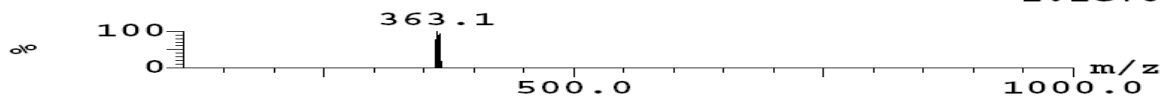

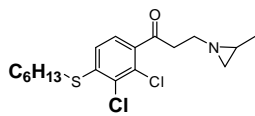

17{2,2,2}

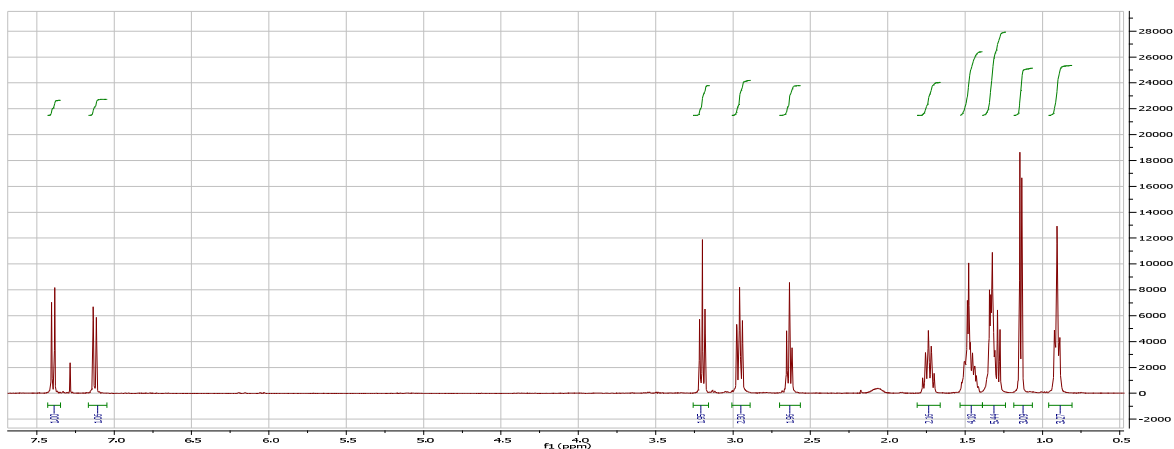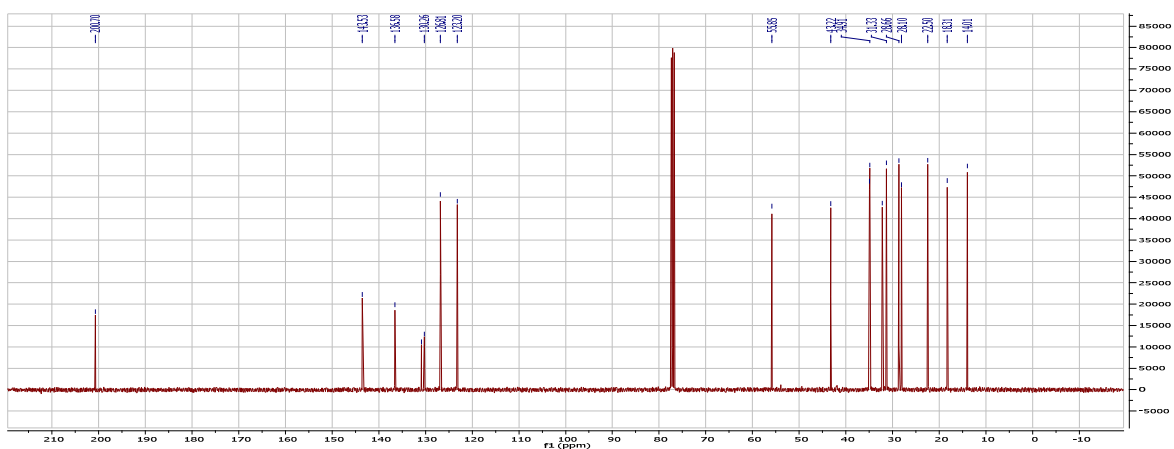

(1) ELSD Signal

322.687

Range: 322.681

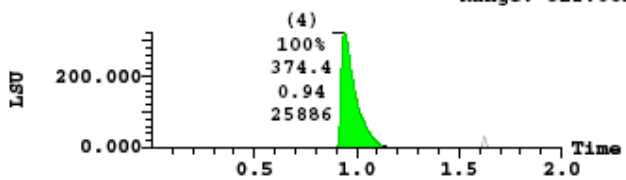

| Peak ID | Compound | Time | Mass Found |
|---------|----------|------|------------|
| 4       | Found    | 0.91 | 374.38     |

4: (Time: 0.91)

1: MS ES+  
5.3e+007

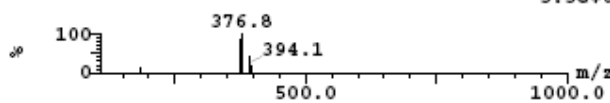

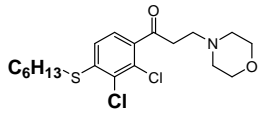

17{2,2,3}

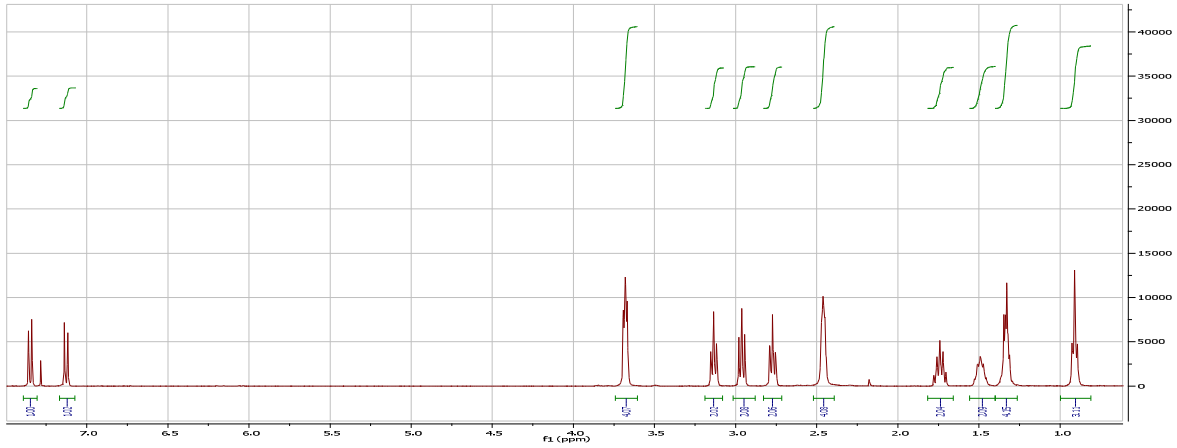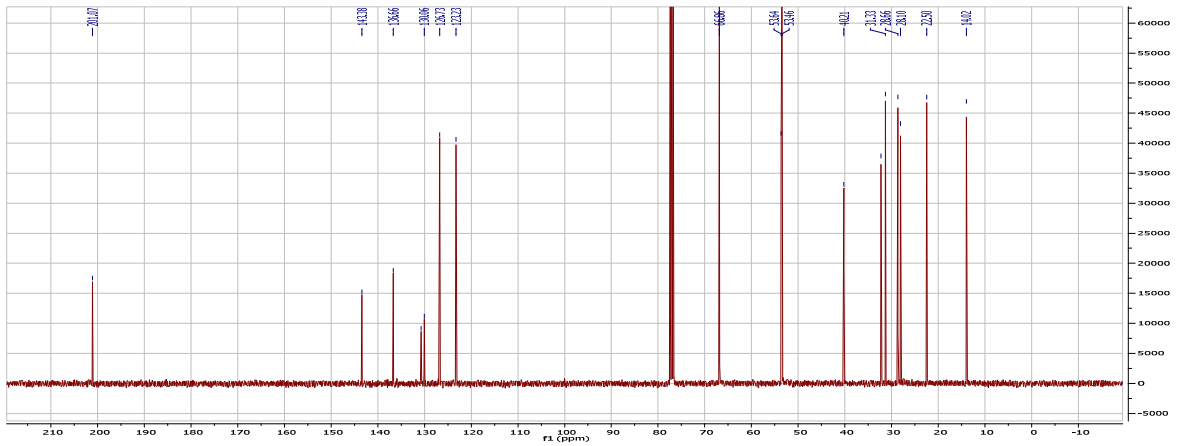

(1) ELSD Signal

550.622

Range: 550.589

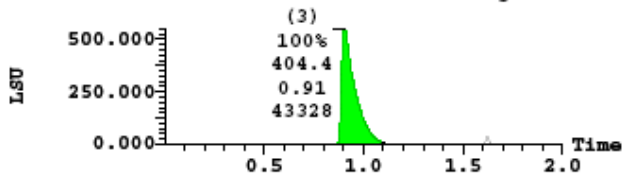

| Peak ID | Compound | Time | Mass Found |
|---------|----------|------|------------|
| 3       | Found    | 0.88 | 404.40     |

3: (Time: 0.88) 1:MS ES+  
8.8e+007

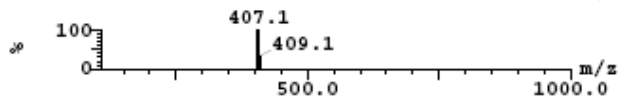

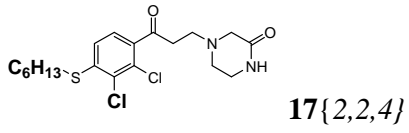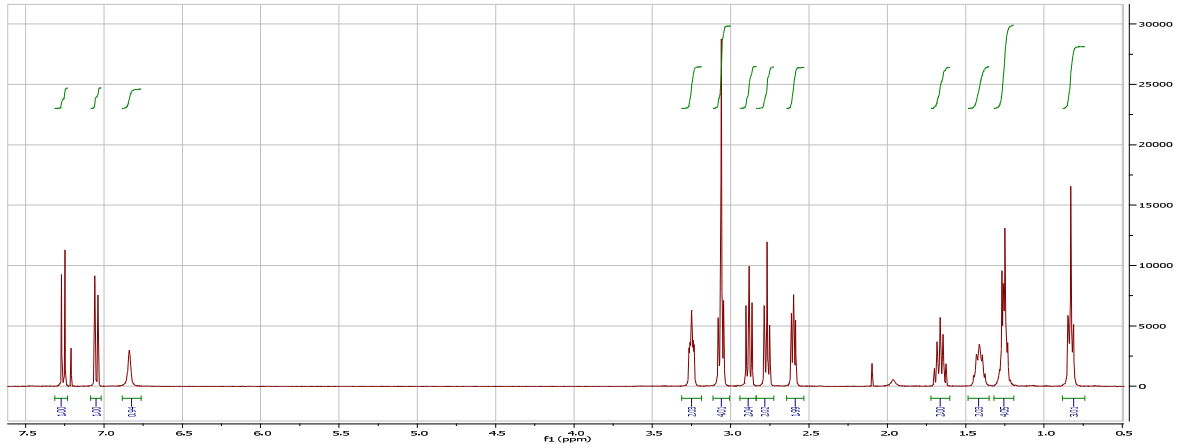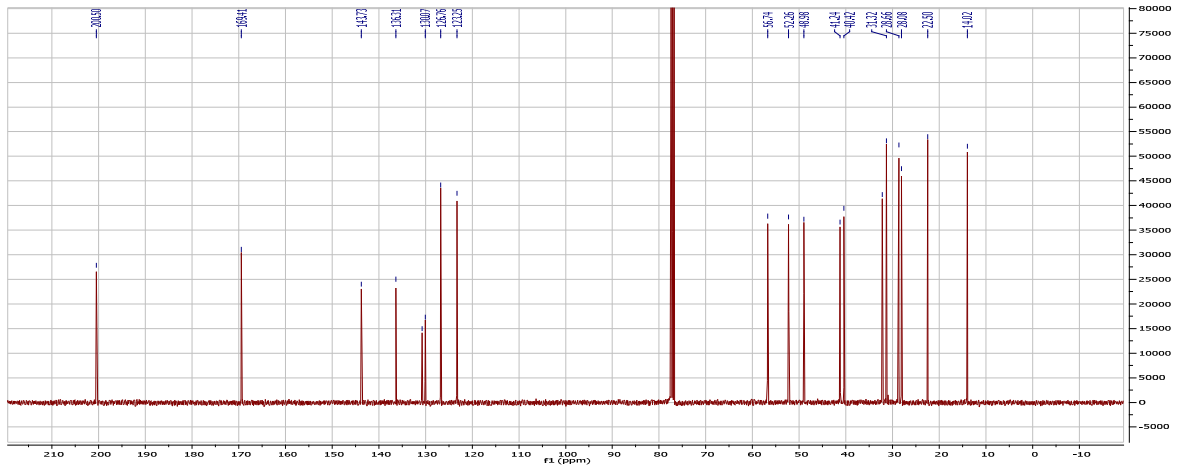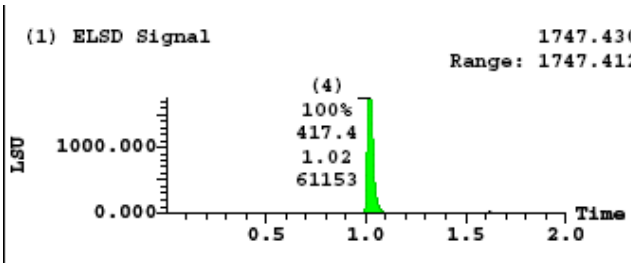

| Peak ID | Compound | Time | Mass Found |
|---------|----------|------|------------|
| 4       | Found    | 1.00 | 417.40     |

4: (Time: 1.02) 1:MS ES+  
1.3e+008

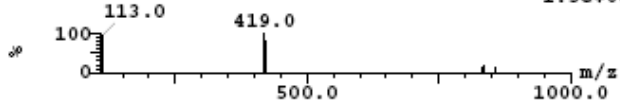

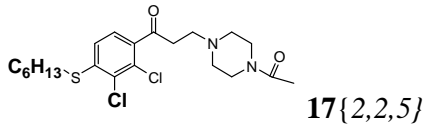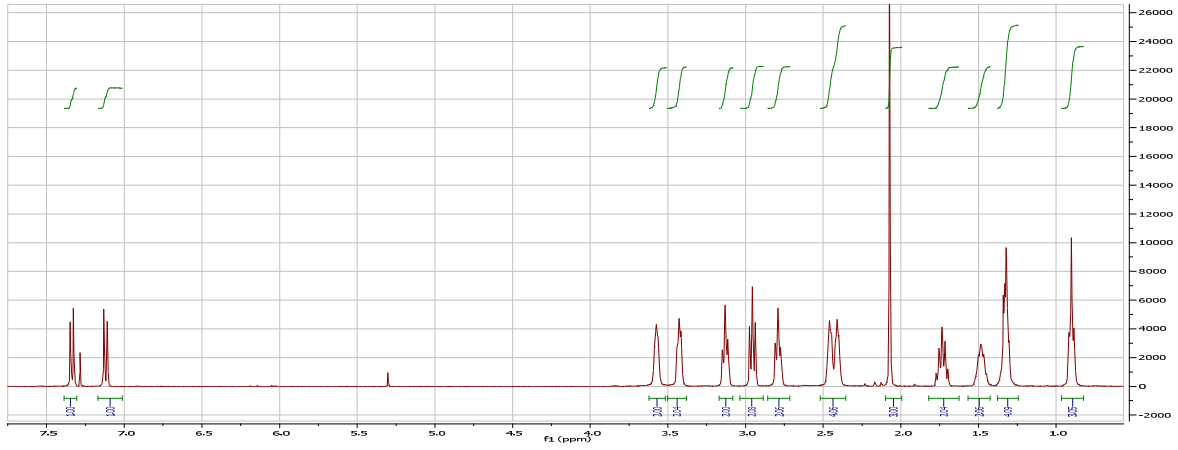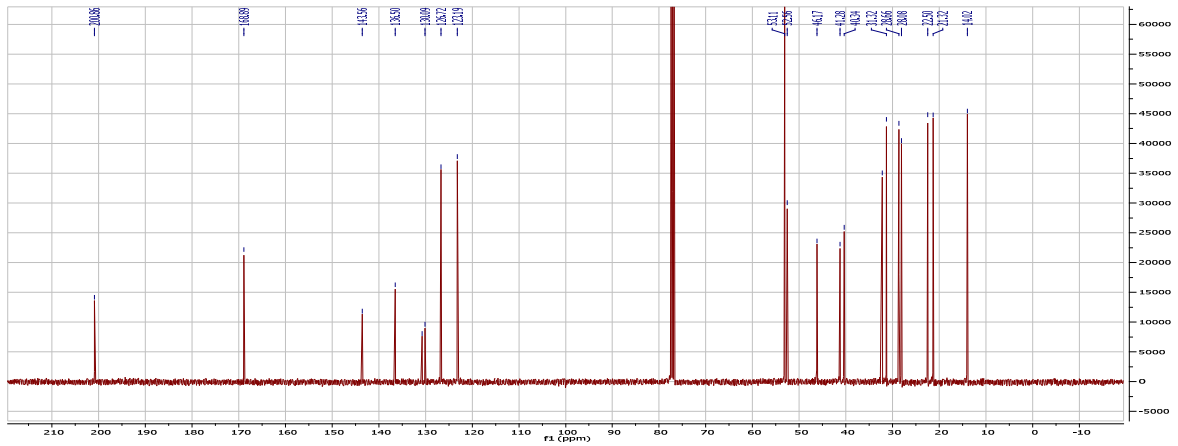

(1) ELSD Signal 634.959  
 Range: 634.927

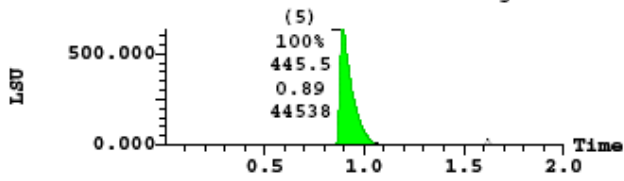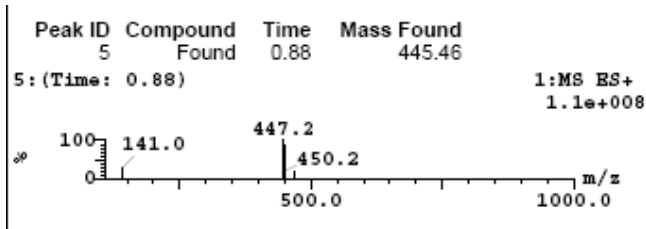

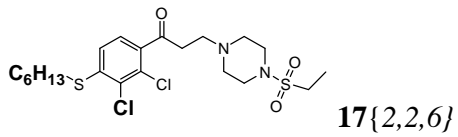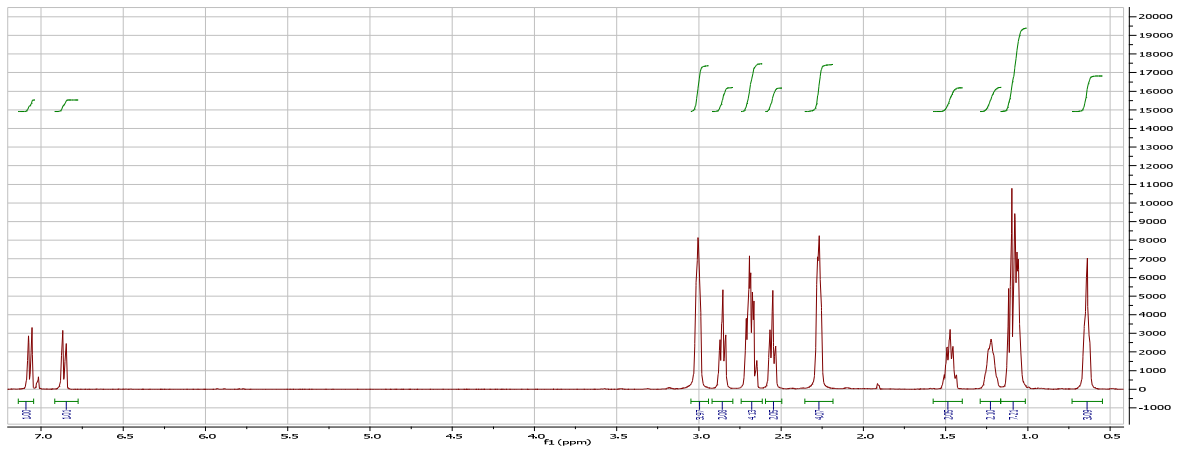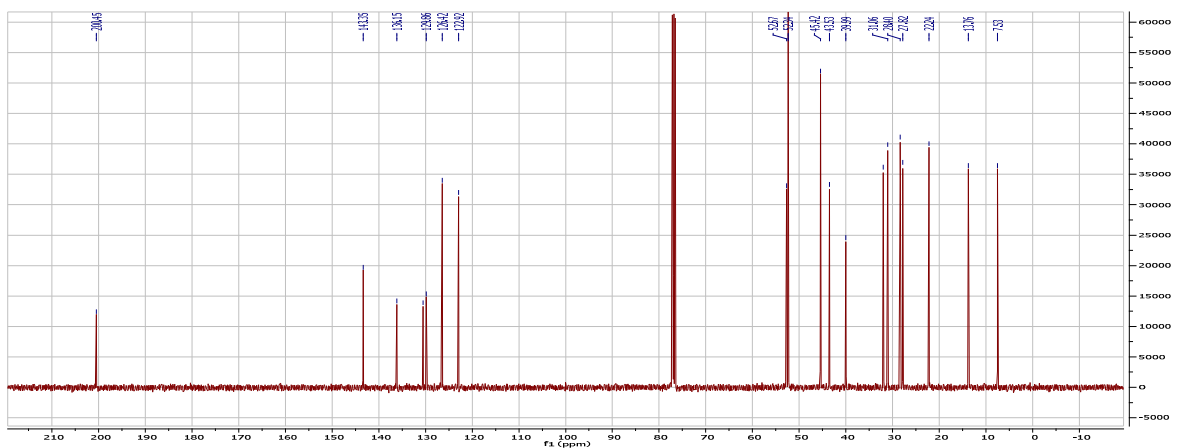

(1) ELSD Signal 881.200  
Range: 881.164

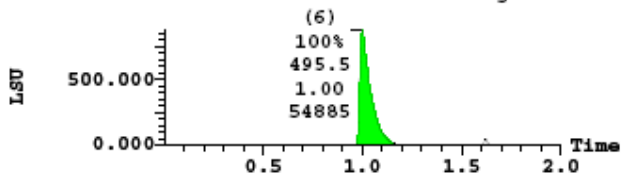

| Peak ID | Compound | Time | Mass Found |
|---------|----------|------|------------|
| 6       | Found    | 0.98 | 495.54     |

6: (Time: 0.98) 1:MS ES+  
9.9e+007

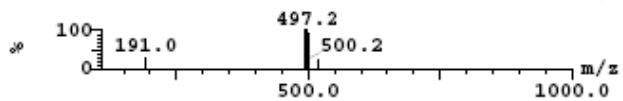

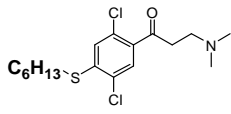

17{2,3,1}

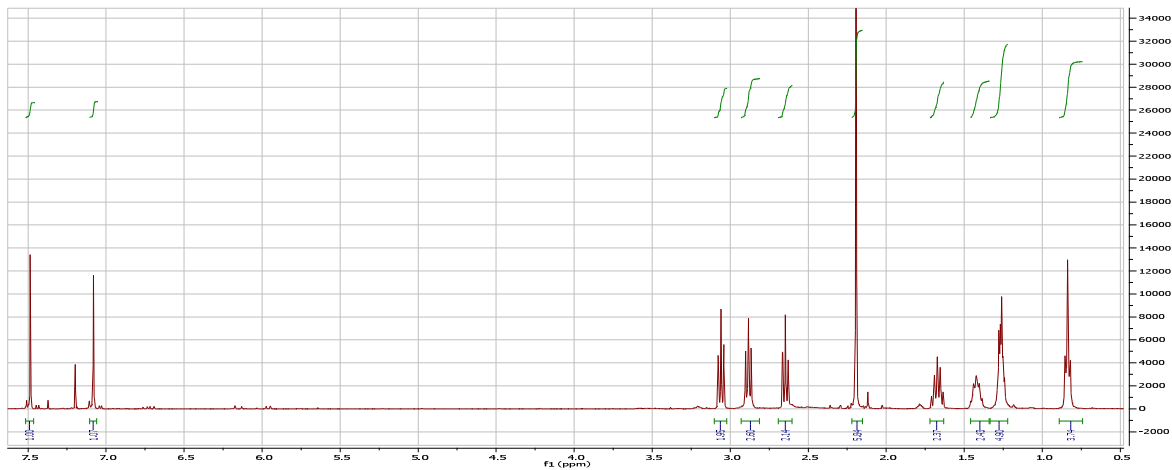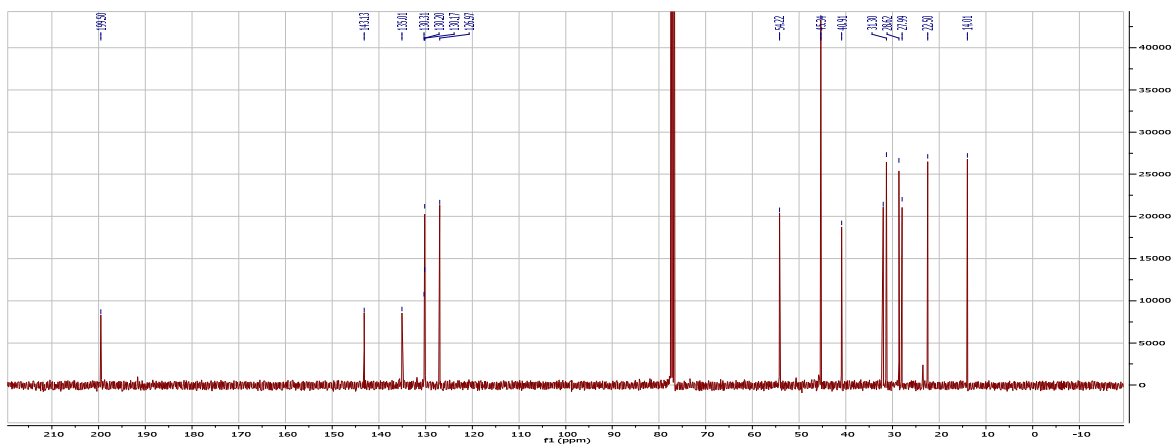

(1) ELSD Signal 84.939  
Range: 84.937

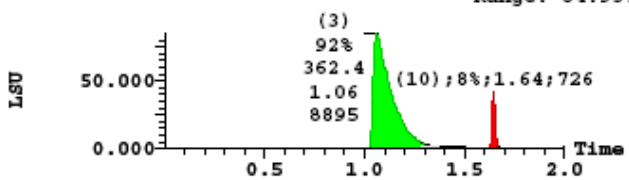

| Peak ID | Compound Found | Time | Mass Found |
|---------|----------------|------|------------|
| 3       | Found          | 1.03 | 362.37     |

3: (Time: 1.03) 1:MS ES+  
3.2e+007

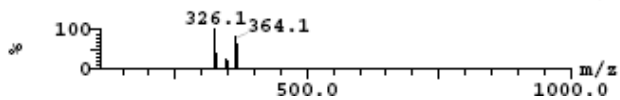



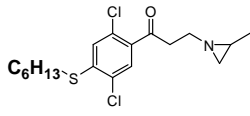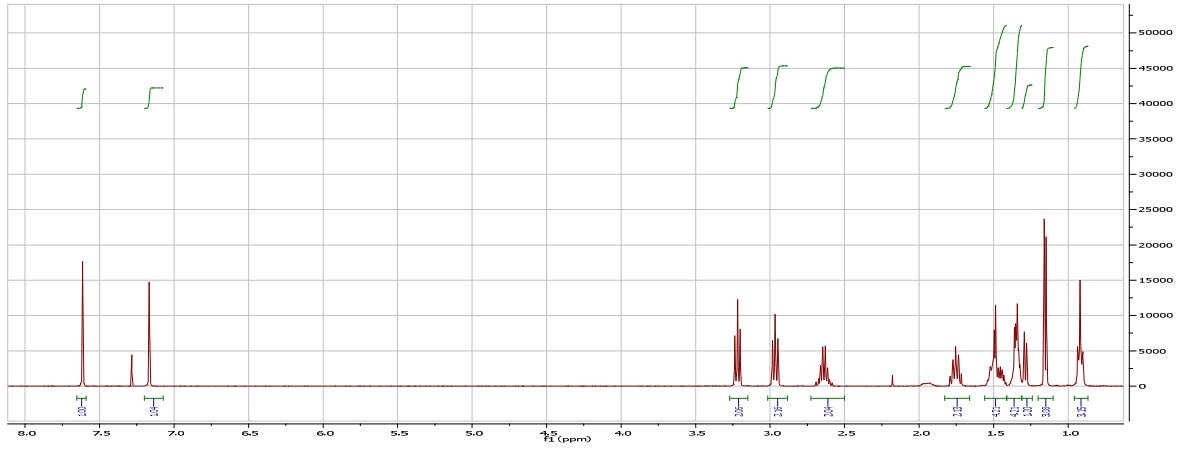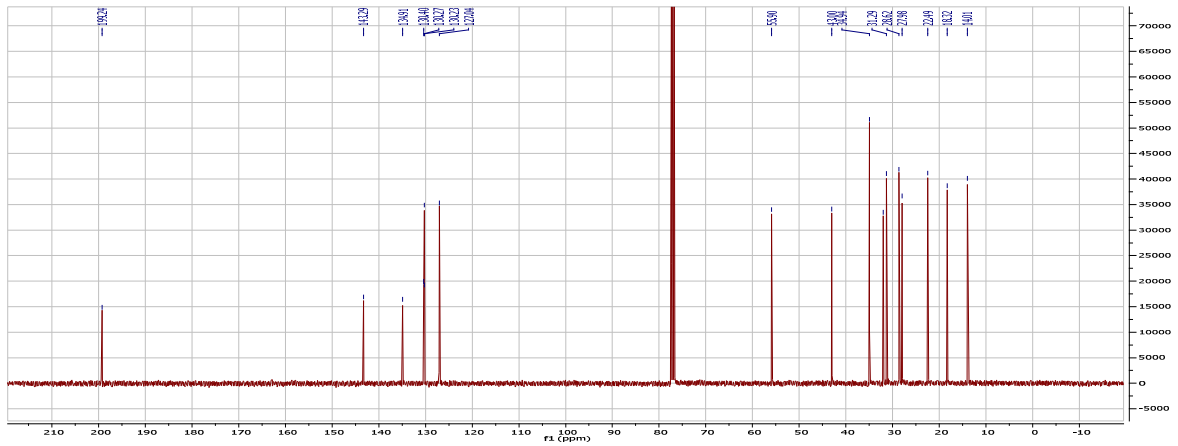

(1) ELSD Signal 433.096  
 Range: 433.066

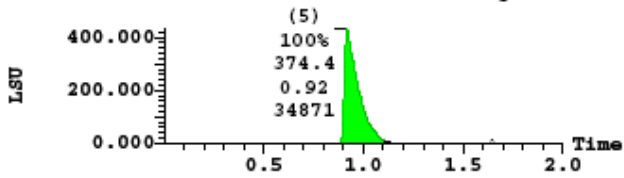

| Peak ID | Compound | Time | Mass Found |
|---------|----------|------|------------|
| 5       | Found    | 0.89 | 374.38     |

5: (Time: 0.89) 1:MS ES+  
2.9e+007

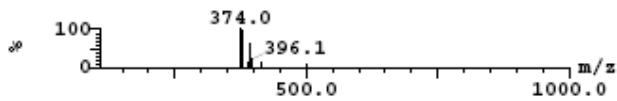

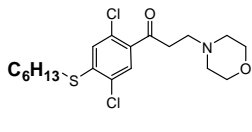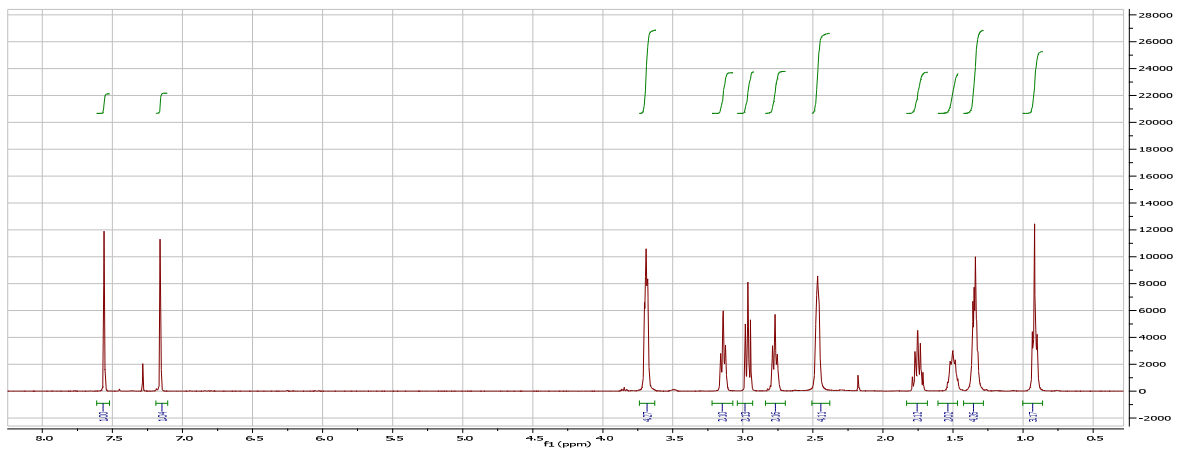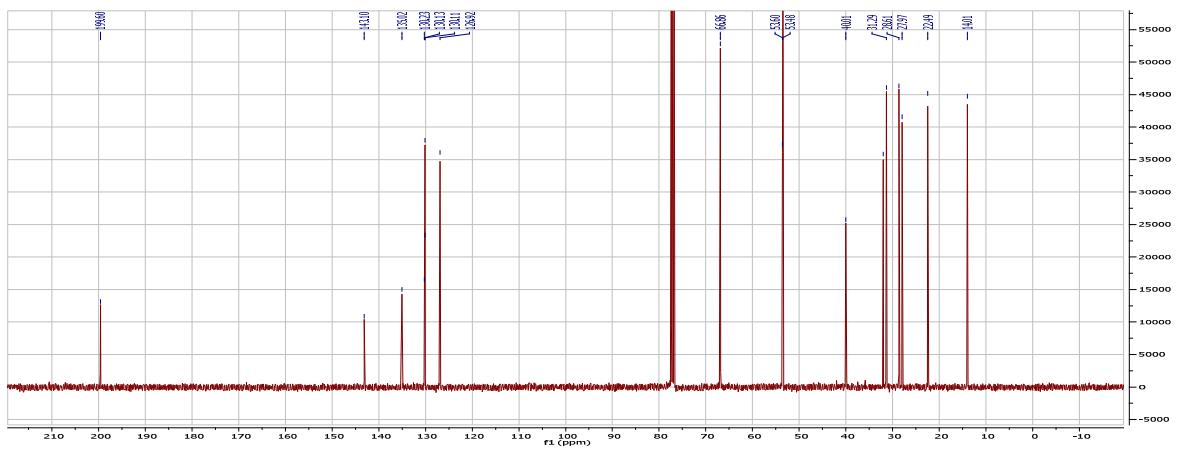

(1) ELSD Signal

477.906

Range: 477.863

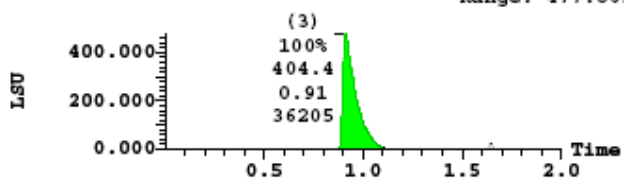

| Peak ID | Compound | Time | Mass Found |
|---------|----------|------|------------|
| 3       | Found    | 0.89 | 404.40     |

1:MS ES+  
3.9e+007

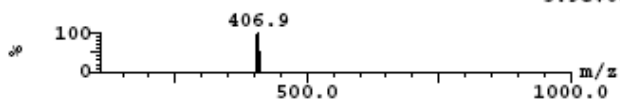

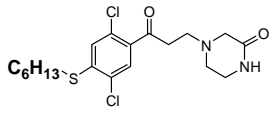

17{2,3,4}

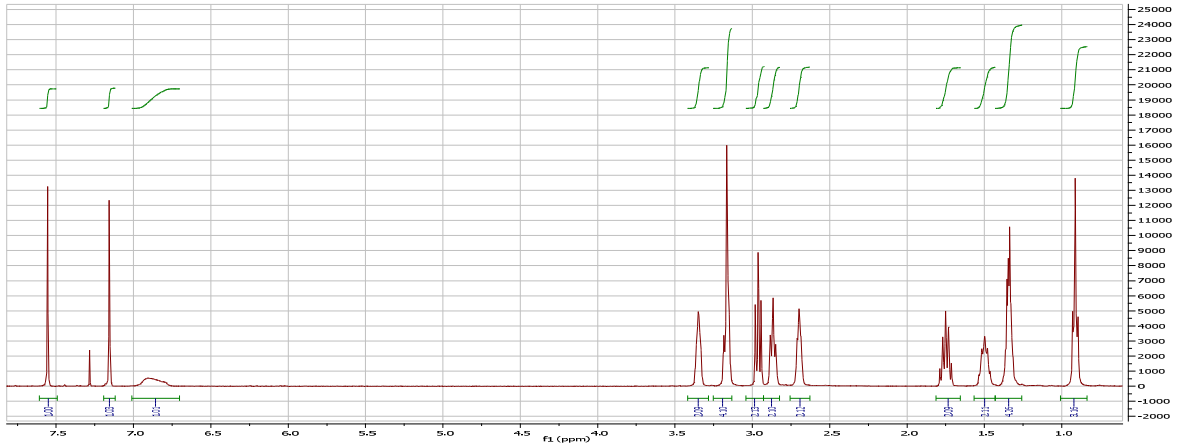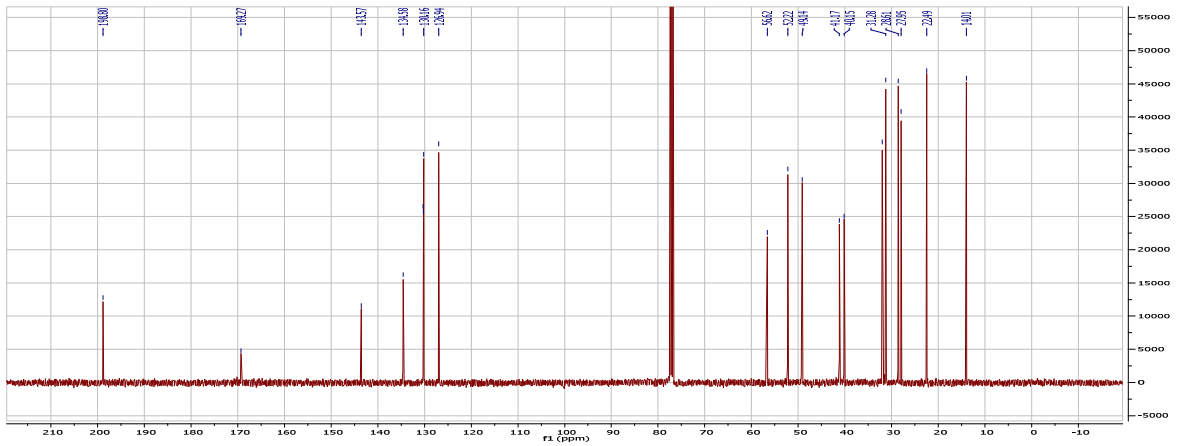

(1) ELSD Signal

1747.445

Range: 1747.428

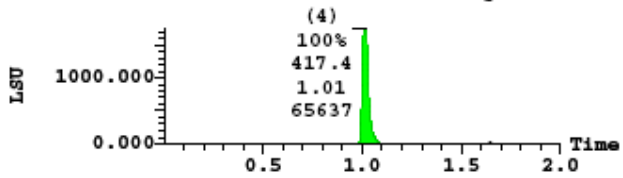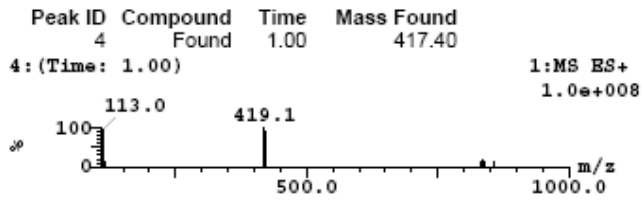

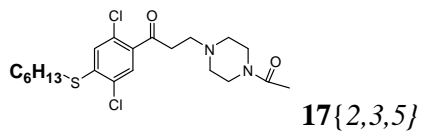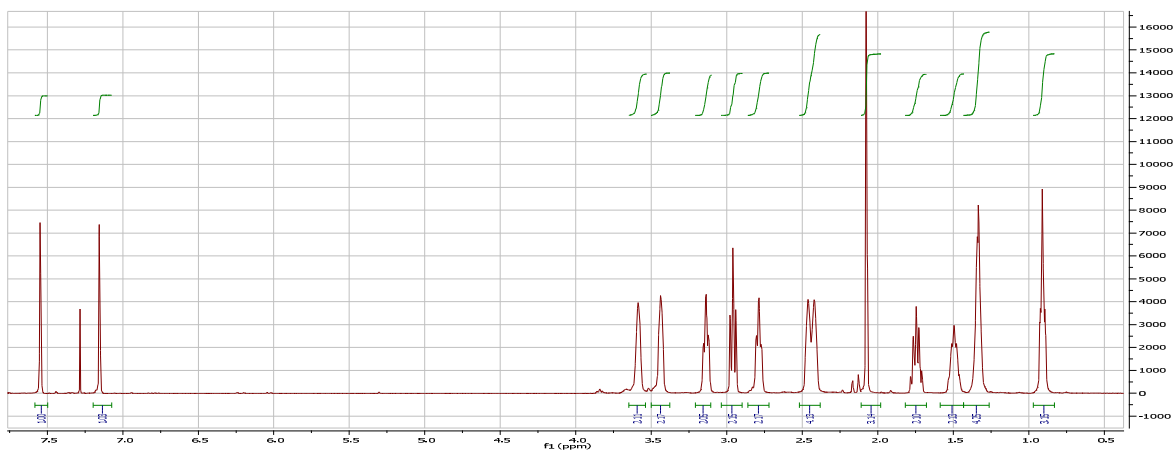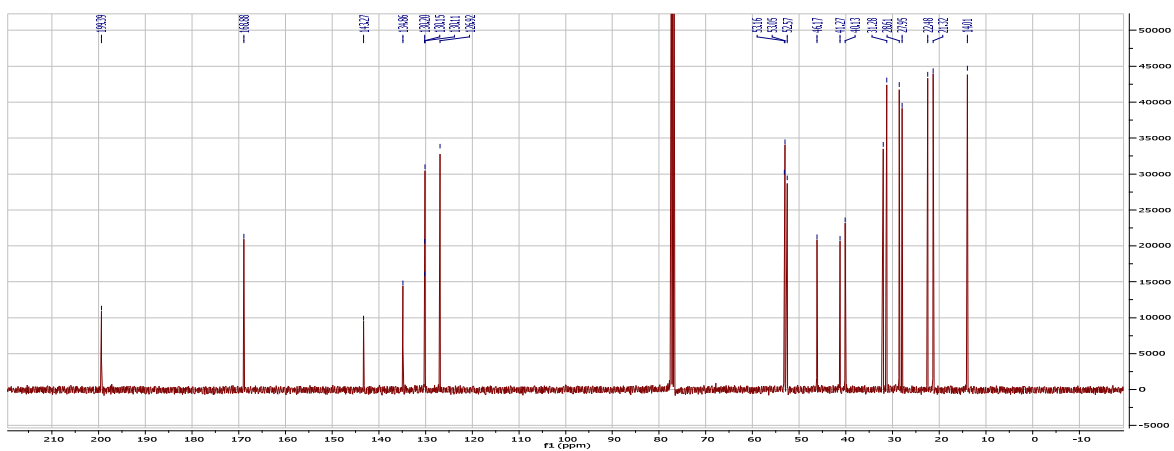

(1) ELSD Signal 892.008  
Range: 891.964

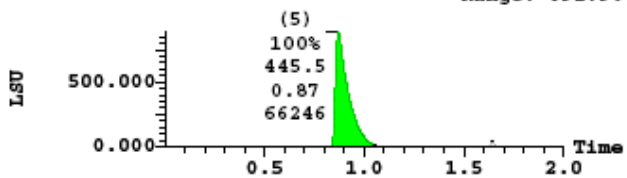

| Peak ID | Compound | Time | Mass Found |
|---------|----------|------|------------|
| 5       | Found    | 0.85 | 445.46     |

5: (Time: 0.85) 1:MS ES+ 7.8e+007

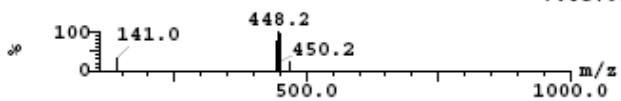

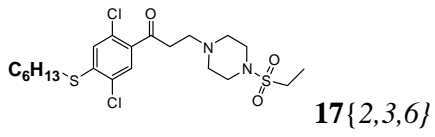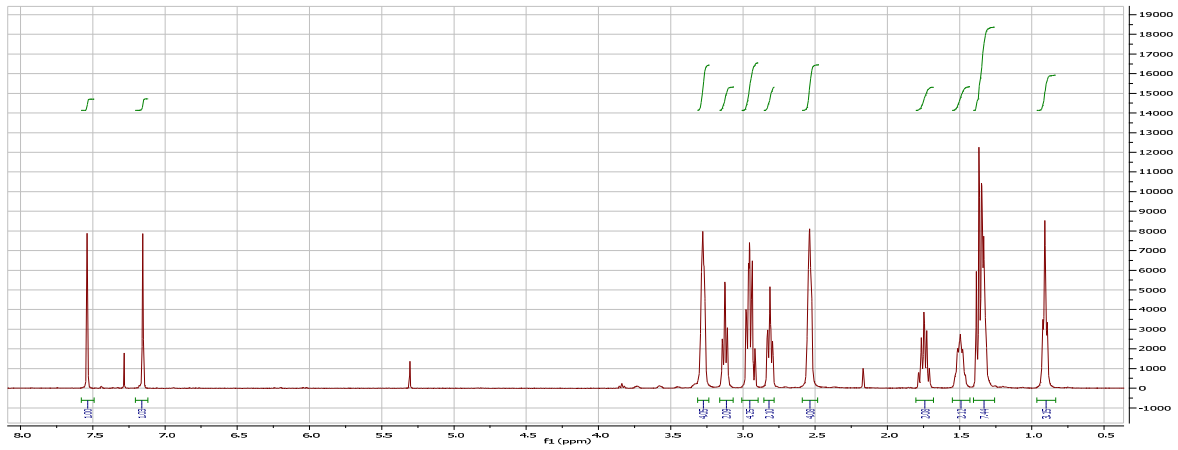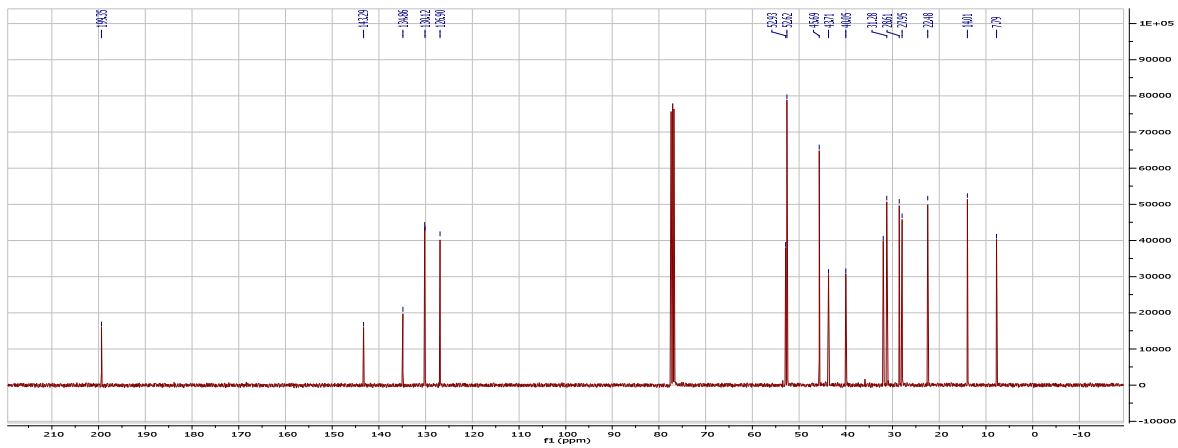

(1) ELSD Signal 823.722  
 Range: 823.714

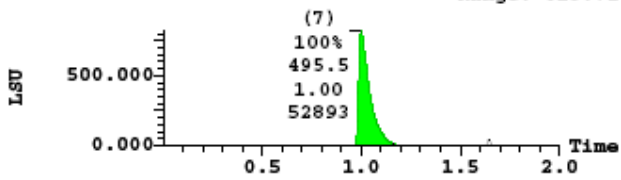

| Peak ID | Compound | Time | Mass Found |
|---------|----------|------|------------|
| 7       | Found    | 0.98 | 495.54     |

7: (Time: 0.98) 1:MS ES+  
9.2e+007

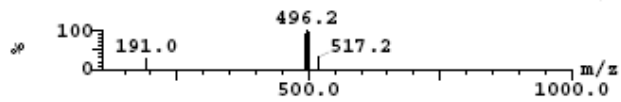

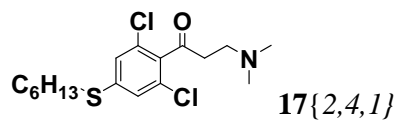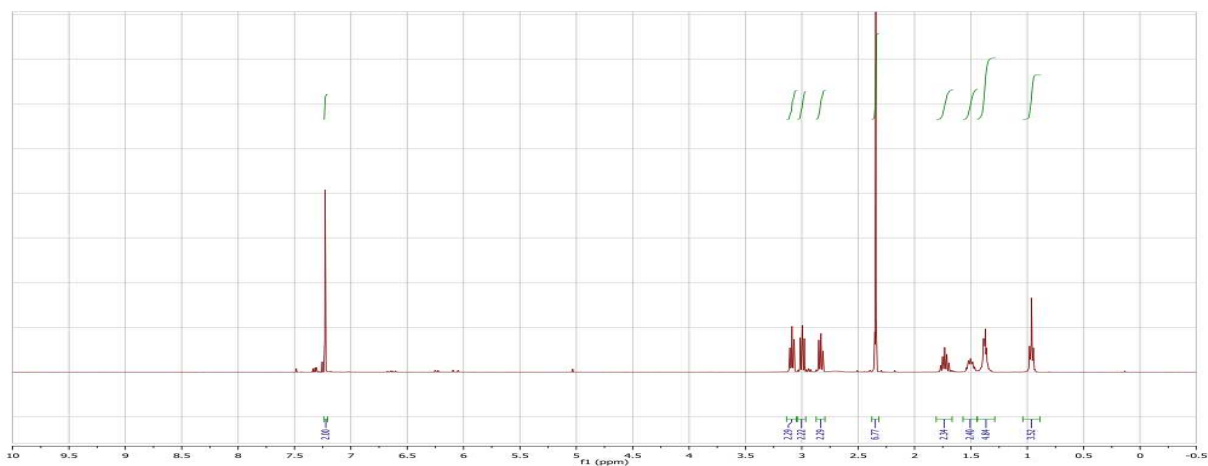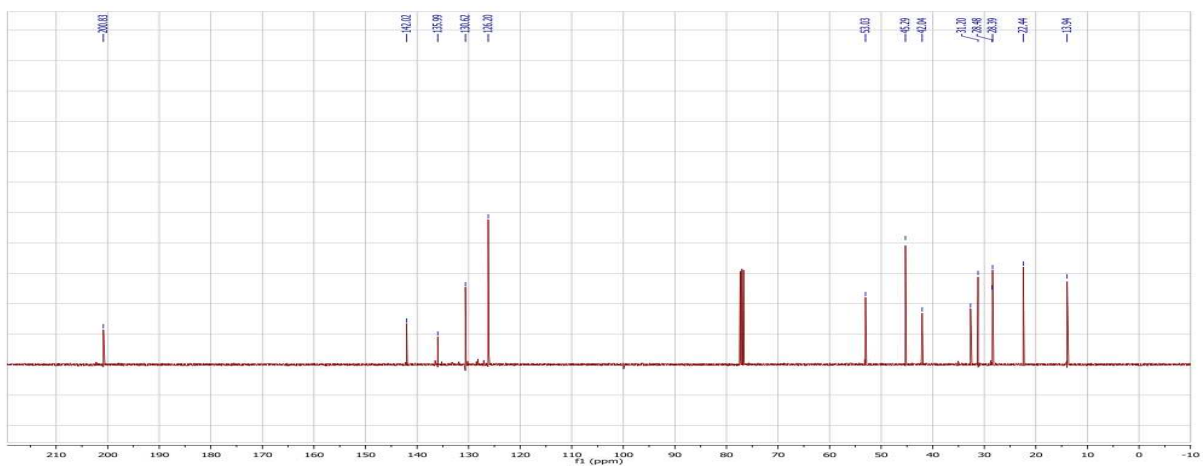

(1) ELSD Signal

61.913  
Range: 61.812

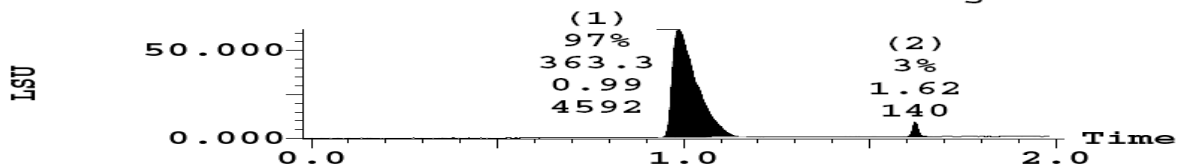

| Peak ID | Compound Found | Time | Mass Found |
|---------|----------------|------|------------|
| 1       | Found          | 0.98 | 363.26     |

1: (Time: 0.98)

1:MS ES+  
4.2e+007

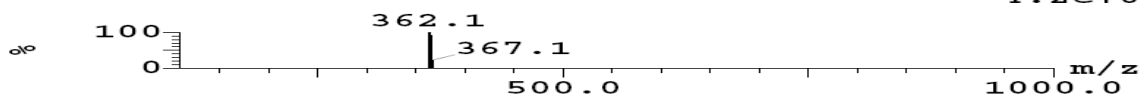

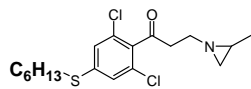

17{2,4,2}

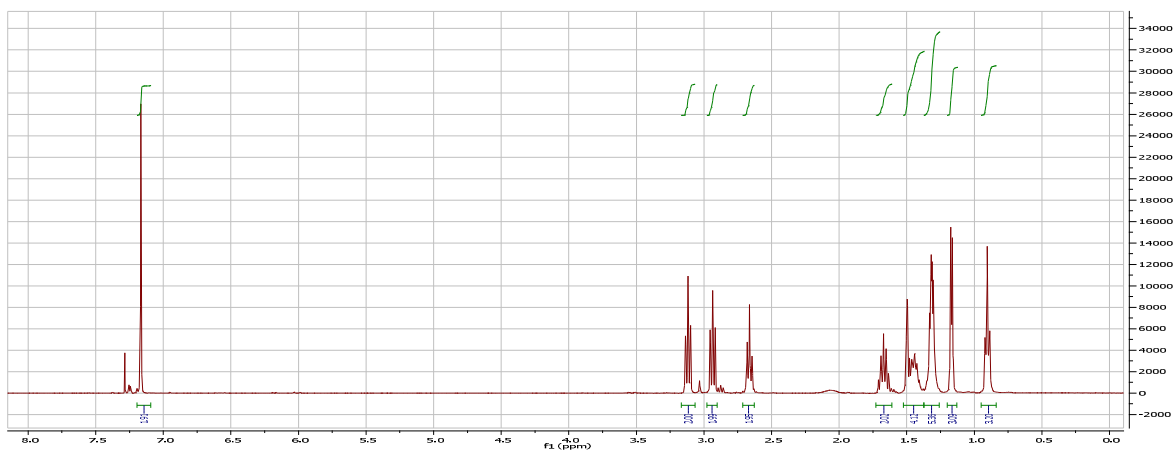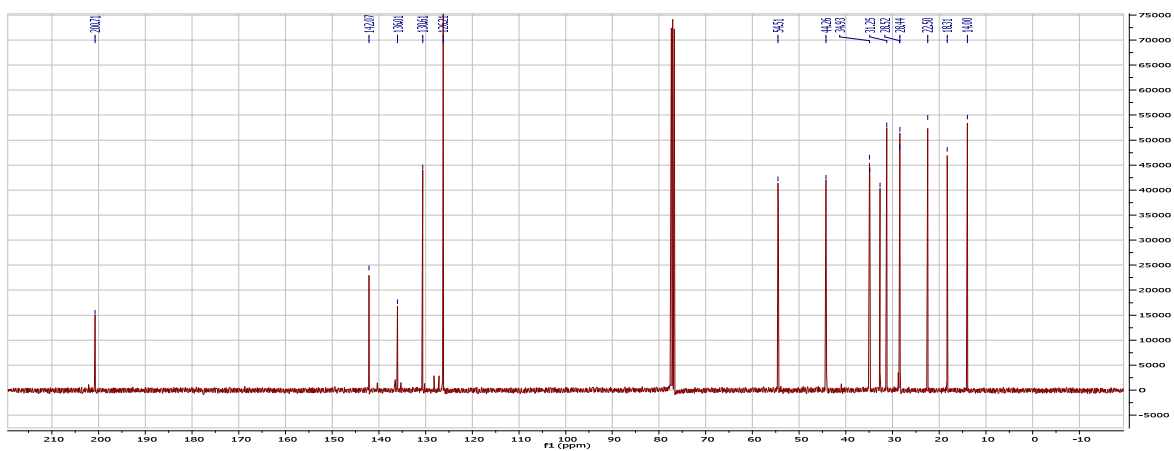

(1) ELSD Signal

358.156

Range: 358.134

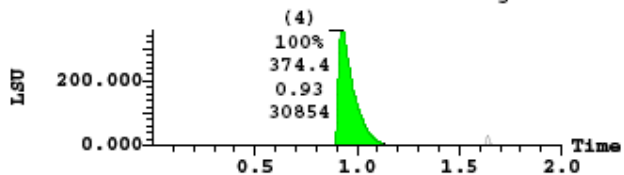

| Peak ID | Compound | Time | Mass Found |
|---------|----------|------|------------|
| 4       | Found    | 0.89 | 374.38     |

4: (Time: 0.89)

1: MS ES+

3.2e+007

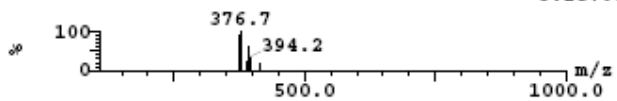

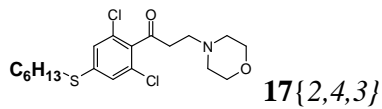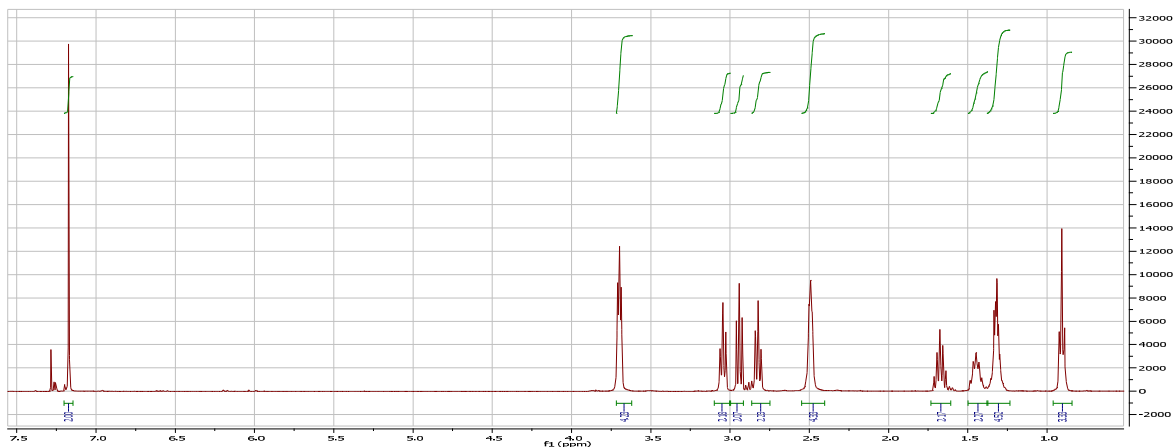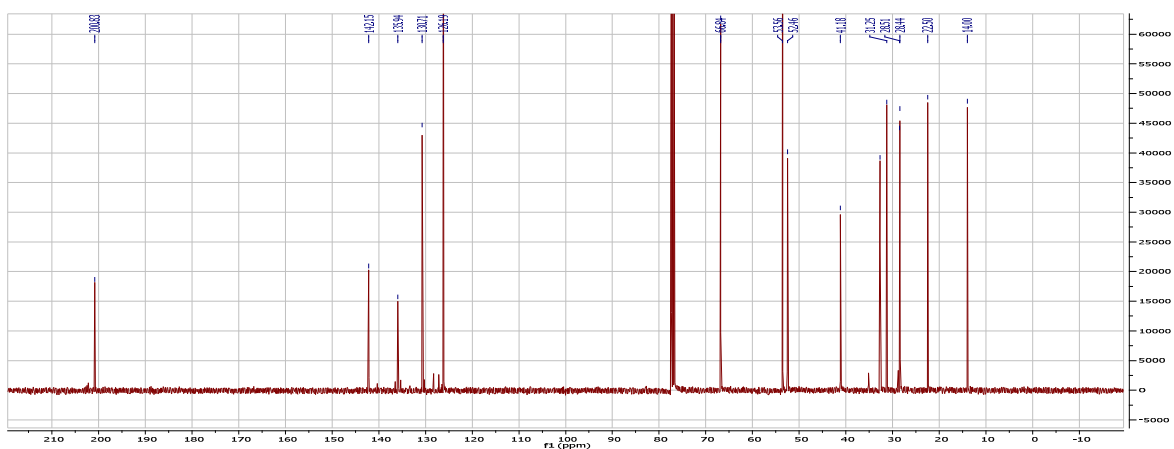

(1) ELSD Signal 468.228  
 Range: 468.224

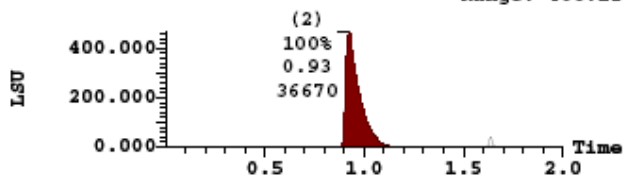

| Peak ID | Compound | Time | Mass Found |
|---------|----------|------|------------|
| 1       | Found    | 0.90 | 404.40     |

1: (Time: 0.90) 1:MS ES+  
1.0e+008

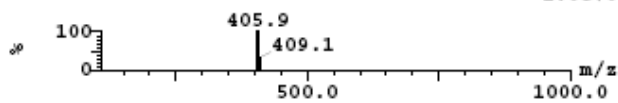



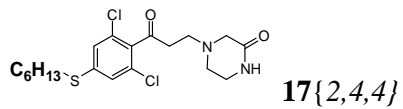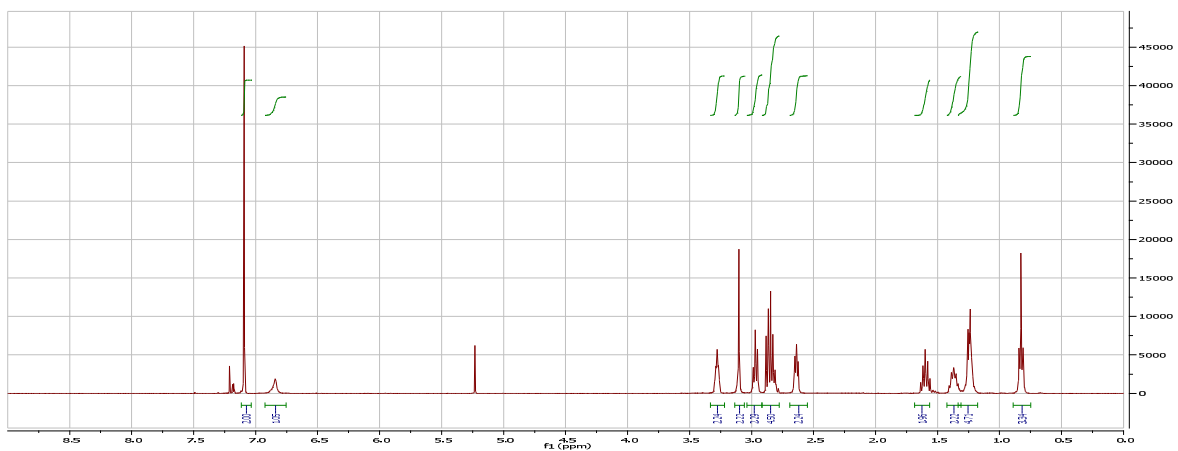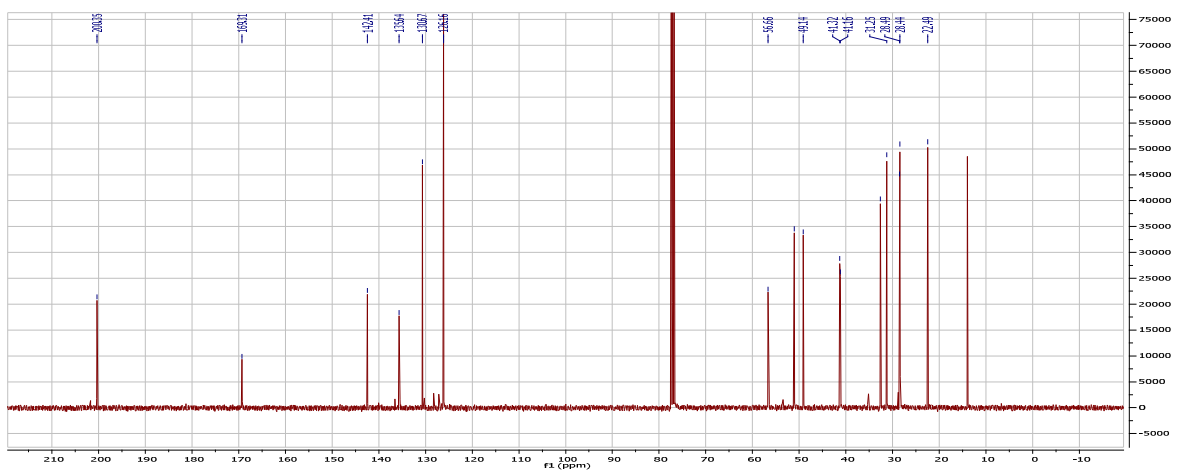

(1) ELSD Signal 1747.507  
Range: 1747.437

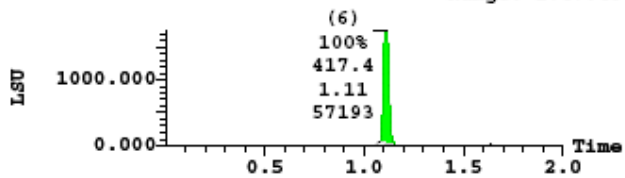

| Peak ID | Compound | Time | Mass Found |
|---------|----------|------|------------|
| 6       | Found    | 1.09 | 417.40     |

1:MS ES+  
1.3e+008

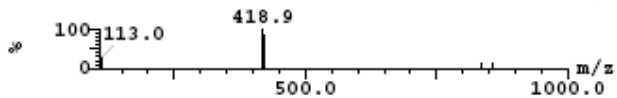

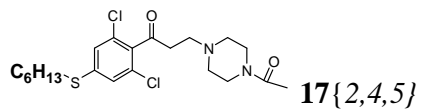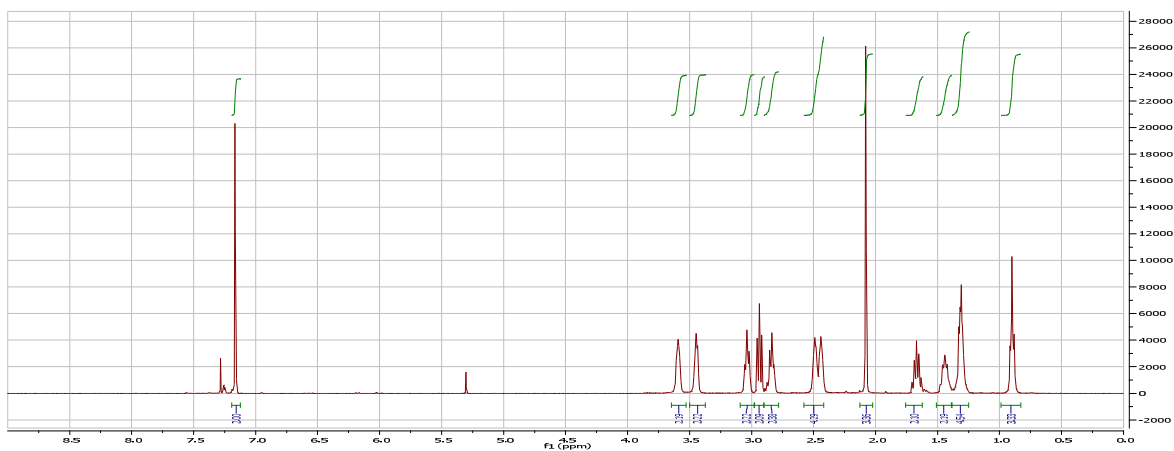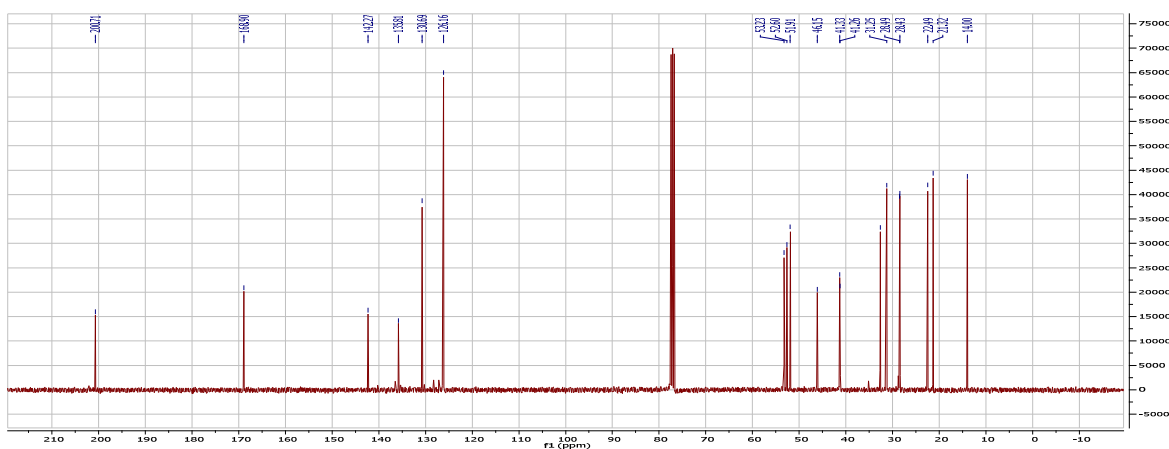

(1) ELSD Signal 615.112  
Range: 615.081

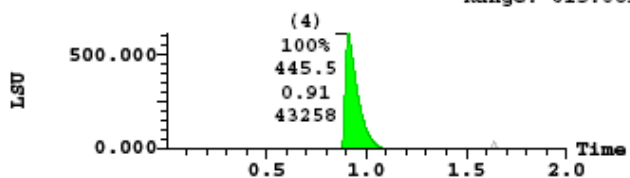

| Peak ID | Compound | Time | Mass Found |
|---------|----------|------|------------|
| 5       | Found    | 0.94 | 445.46     |

5: (Time: 0.94) 1:MS ES+ 1.0e+008

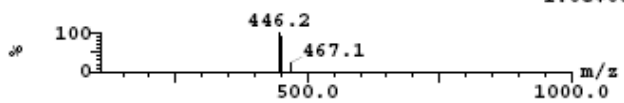

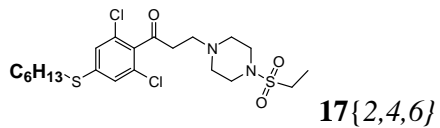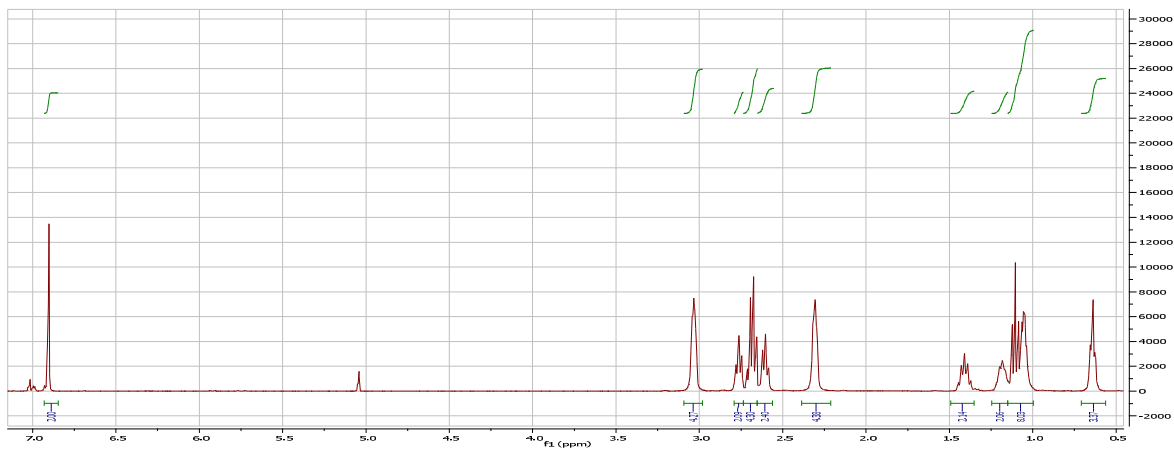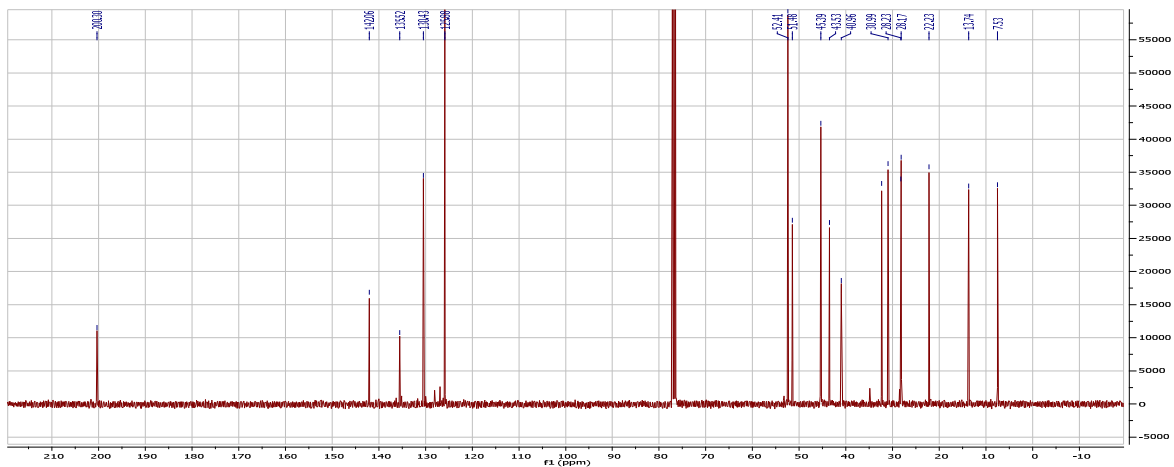

(1) ELSD Signal 1066.109  
Range: 1066.088

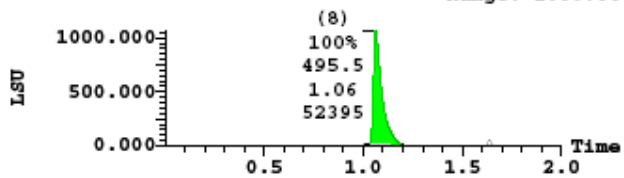

| Peak ID | Compound Found | Time | Mass Found |
|---------|----------------|------|------------|
| 8       | Found          | 1.04 | 495.54     |

8: (Time: 1.04) 1:MS ES+ 9.2e+007

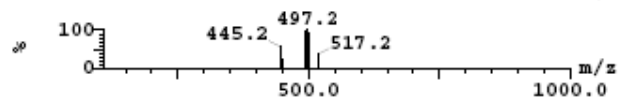

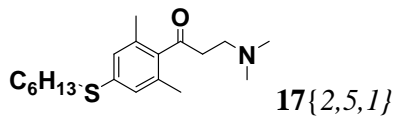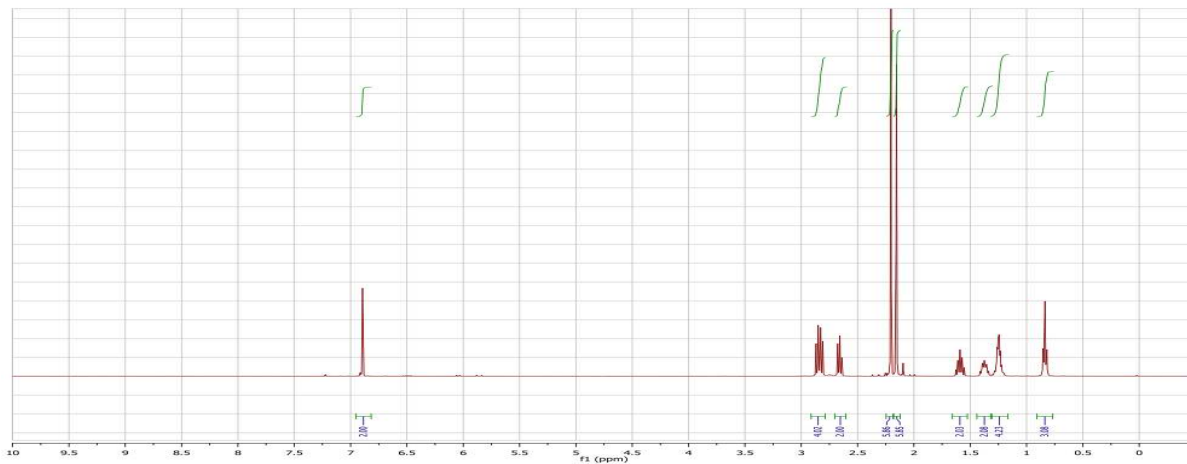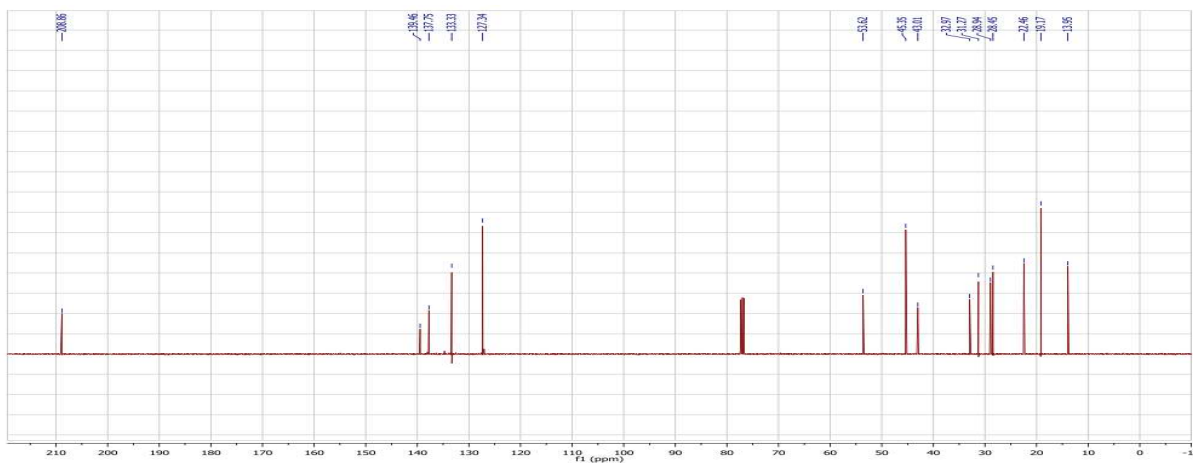

(1) ELSD Signal

35.933  
Range: 35.924

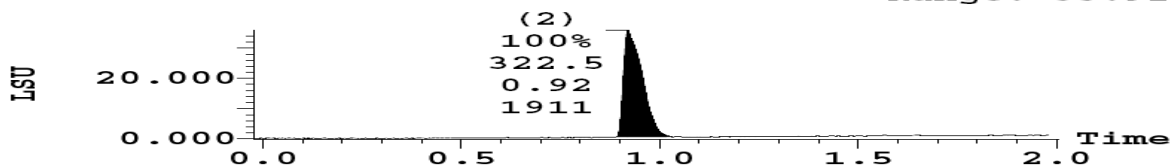

| Peak ID | Compound | Time | Mass Found |
|---------|----------|------|------------|
| 2       | Found    | 0.92 | 322.52     |

2 : (Time: 0.92) 1:MS ES+ 8.6e+007

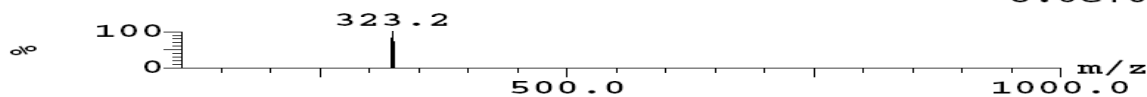

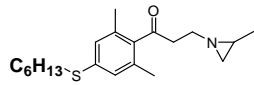

17{2,5,2}

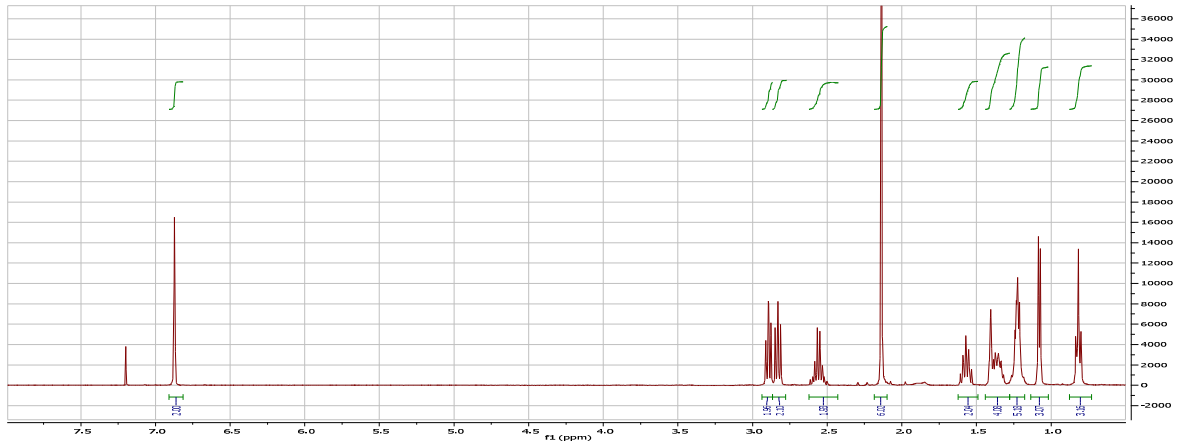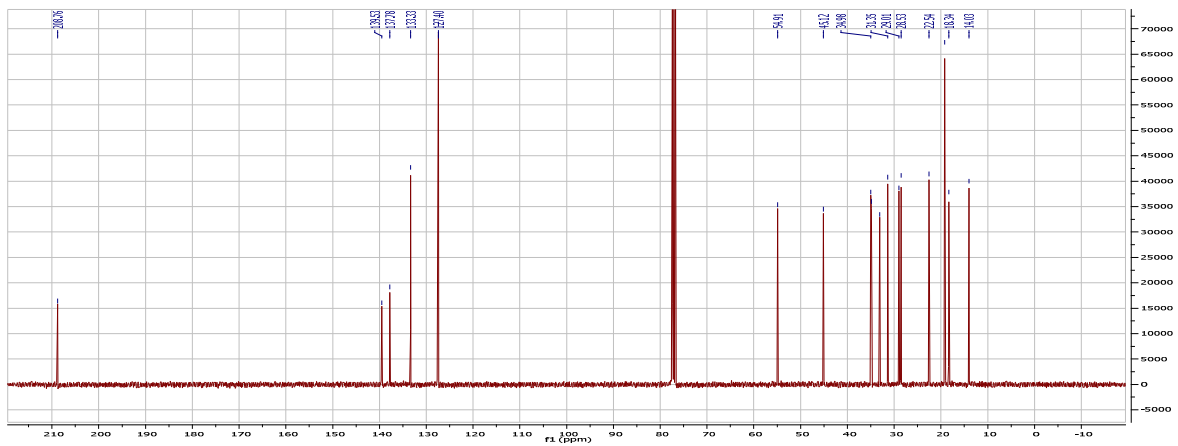

(1) ELSD Signal 422.509  
Range: 422.441

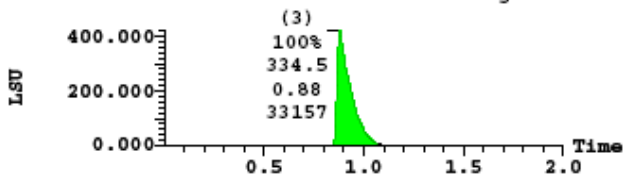

| Peak ID | Compound | Time | Mass Found |
|---------|----------|------|------------|
| 3       | Found    | 0.85 | 334.54     |

3: (Time: 0.85) 1:MS ES+ 3.3e+007

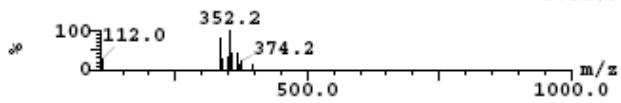

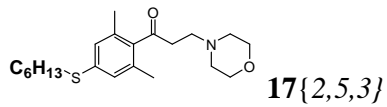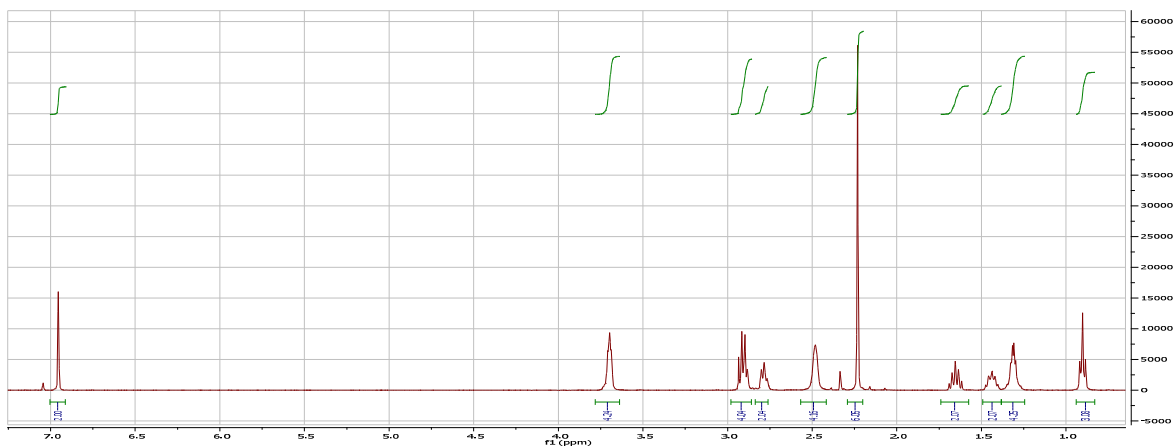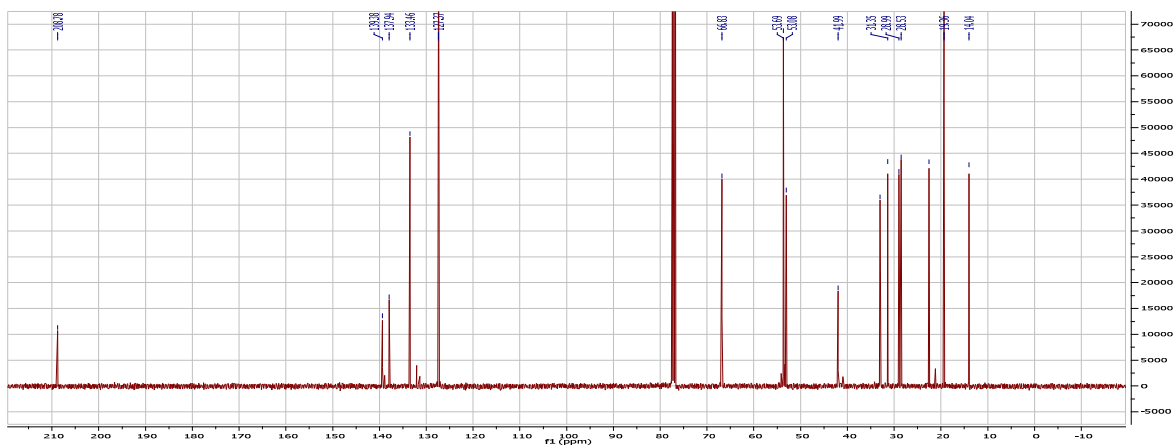

(1) ELSD Signal

467.440

Range: 467.421

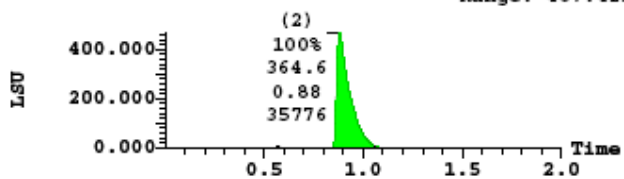

| Peak ID | Compound | Time | Mass Found |
|---------|----------|------|------------|
| 2       | Found    | 0.89 | 364.57     |

2: (Time: 0.89)

1: MS ES+

1.3e+008

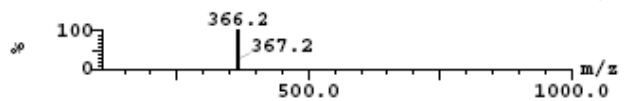

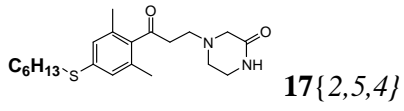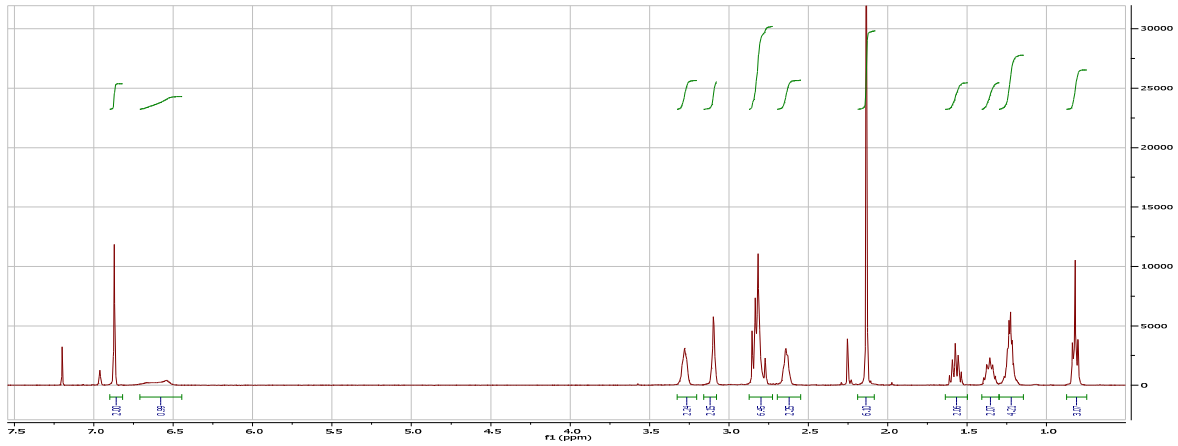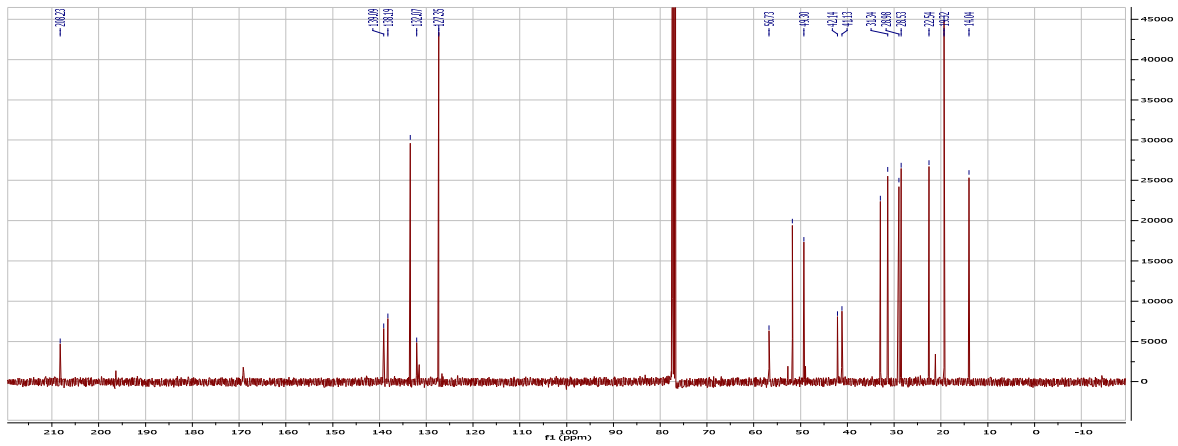

(1) ELSD Signal 1147.845  
Range: 1147.810

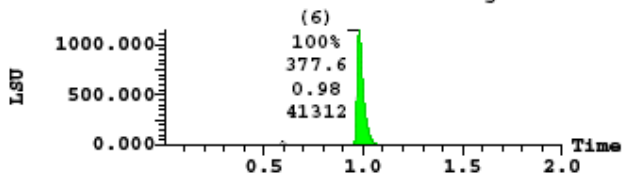

| Peak ID | Compound | Time | Mass Found |
|---------|----------|------|------------|
| 6       | Found    | 0.96 | 377.57     |

6: (Time: 0.96) 1:MS ES+  
9.1e+007

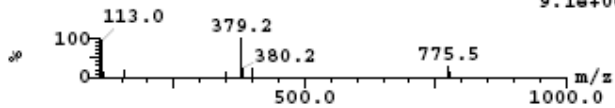

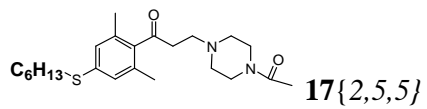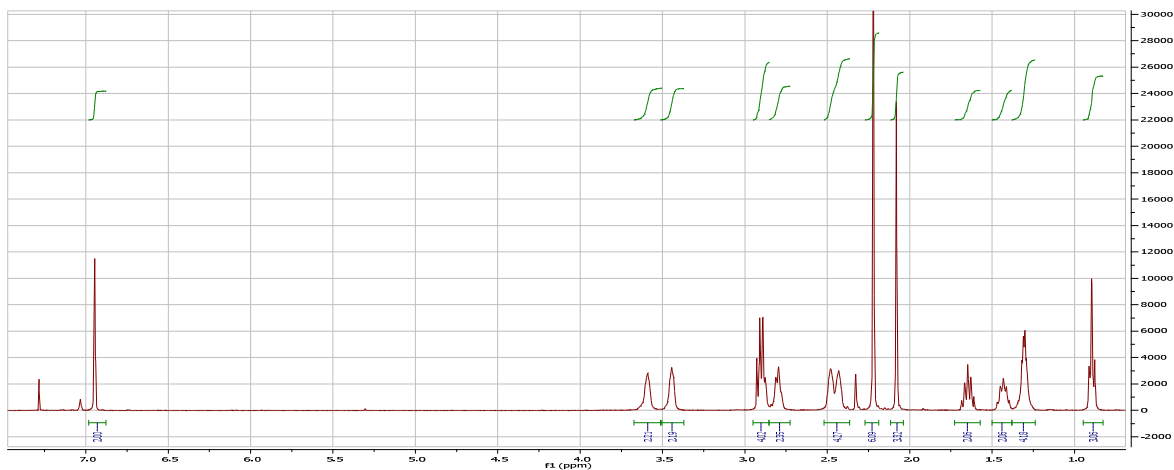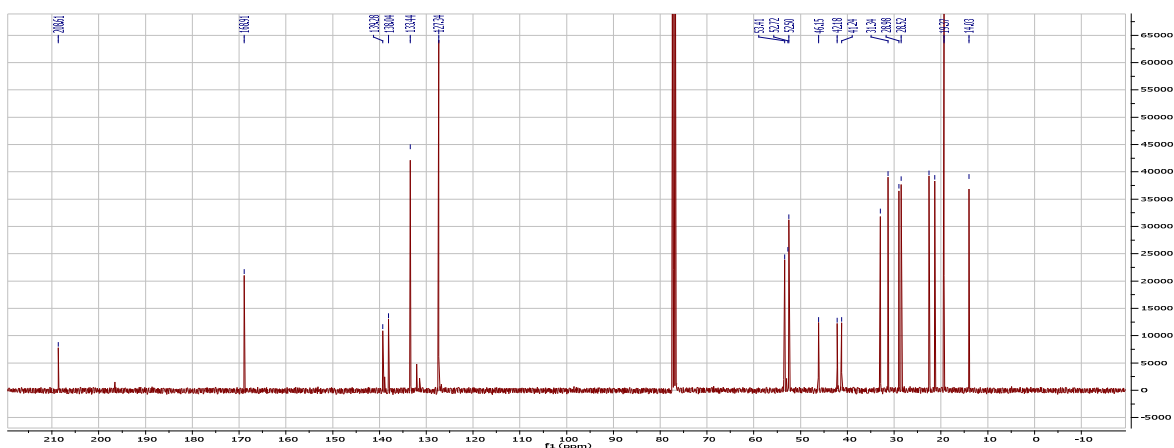

(1) ELSD Signal 487.872  
Range: 487.833

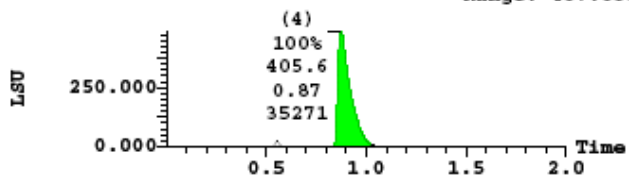

| Peak ID | Compound | Time | Mass Found |
|---------|----------|------|------------|
| 4       | Found    | 0.86 | 405.62     |

1:MS ES+  
1.1e+008

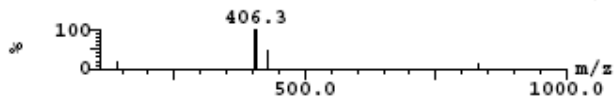



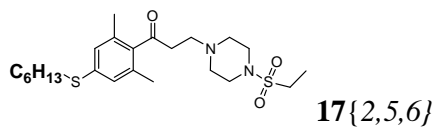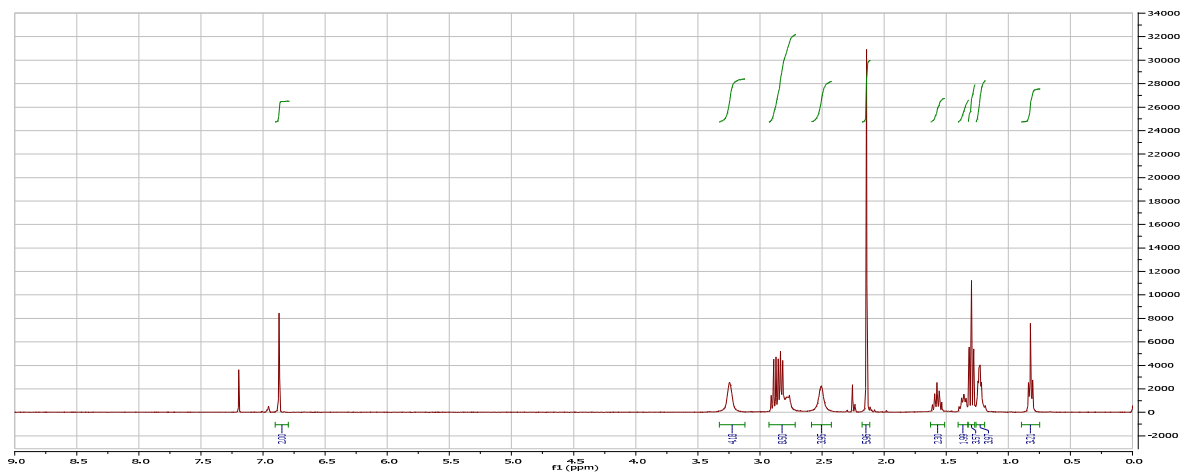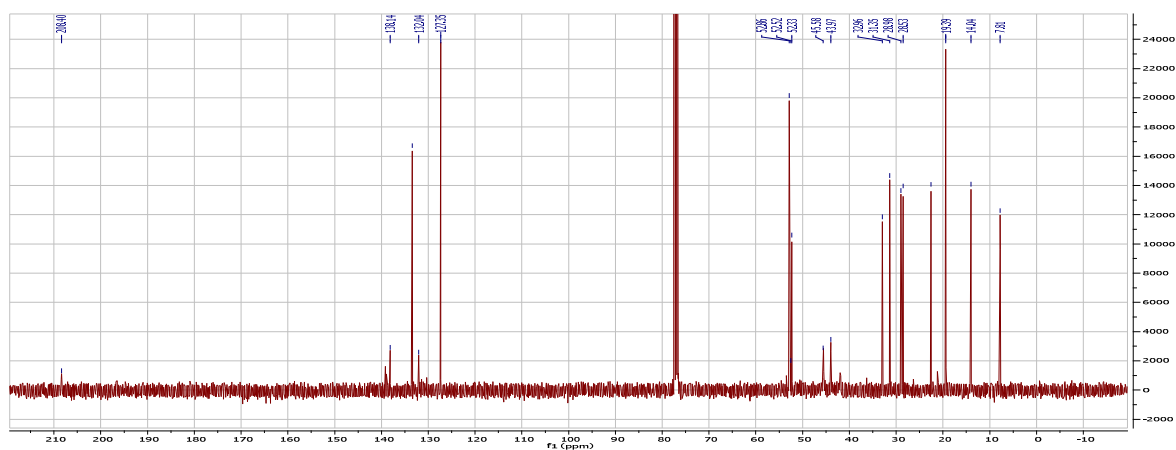

(1) ELSD Signal 594.953  
Range: 594.935

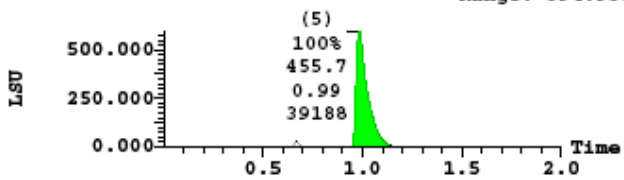

| Peak ID | Compound | Time | Mass Found |
|---------|----------|------|------------|
| 5       | Found    | 0.96 | 455.70     |

5: (Time: 0.96) 1:MS ES+  
8.1e+007

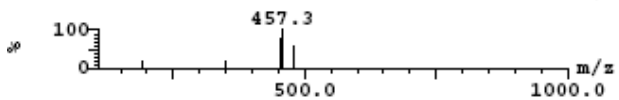

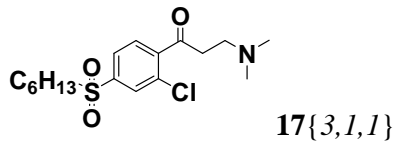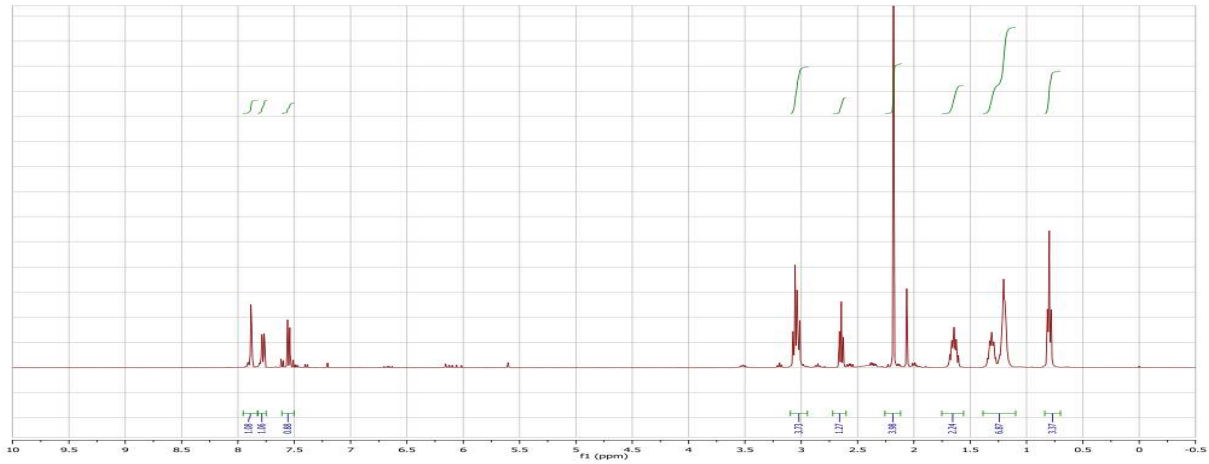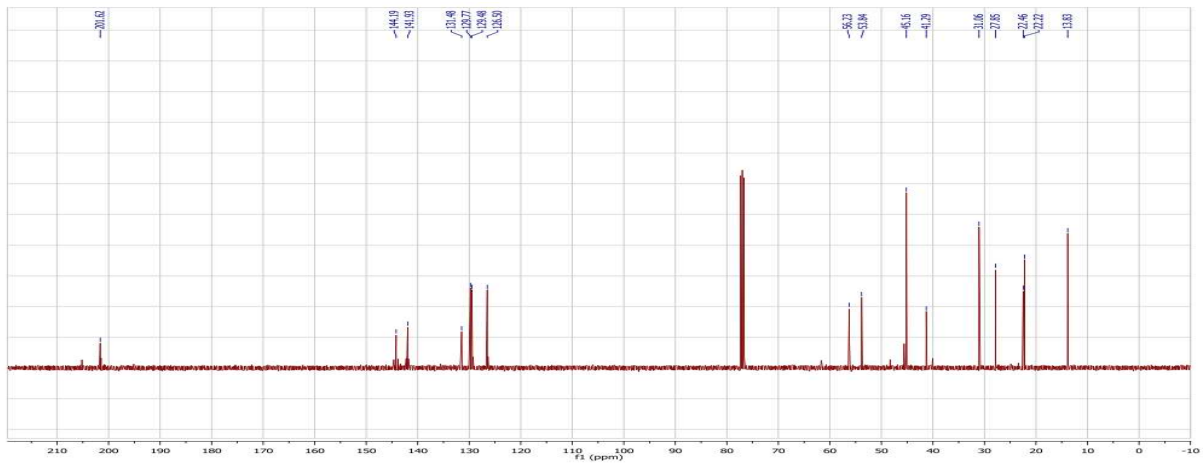

(1) ELSD Signal

35.800  
Range: 35.755

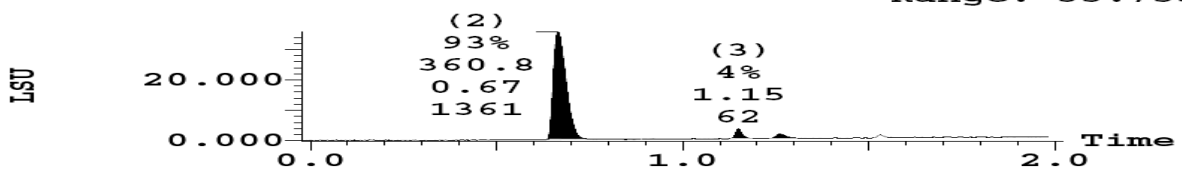

| Peak ID | Compound | Time | Mass Found |
|---------|----------|------|------------|
| 2       | Found    | 0.67 | 360.81     |

2: (Time: 0.67)

1: MS ES+  
1.0e+008

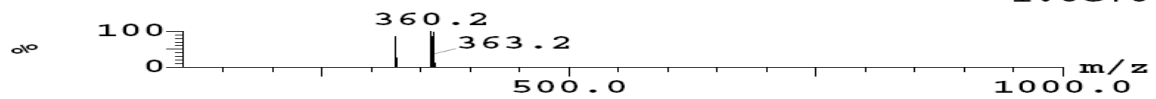

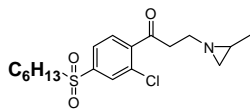

17{3,1,2}

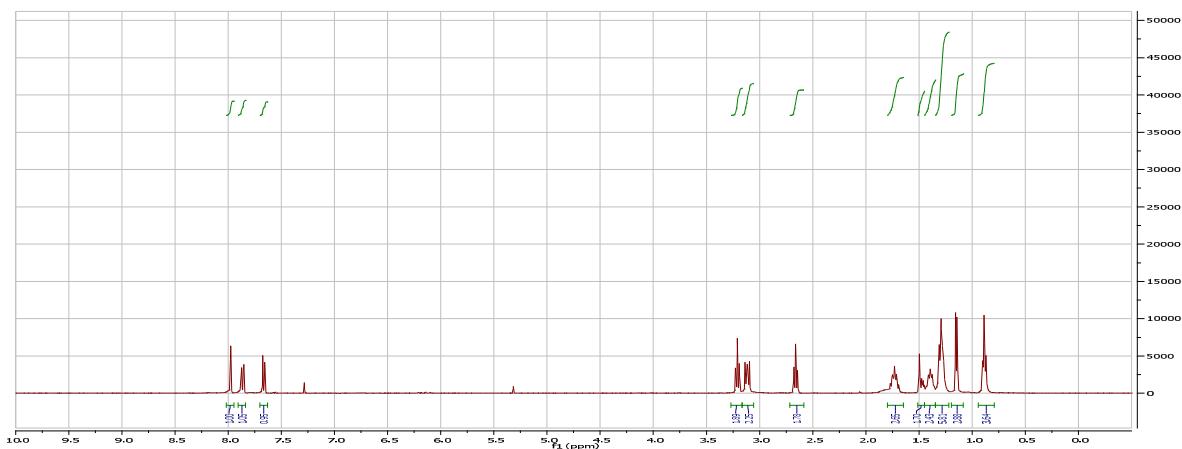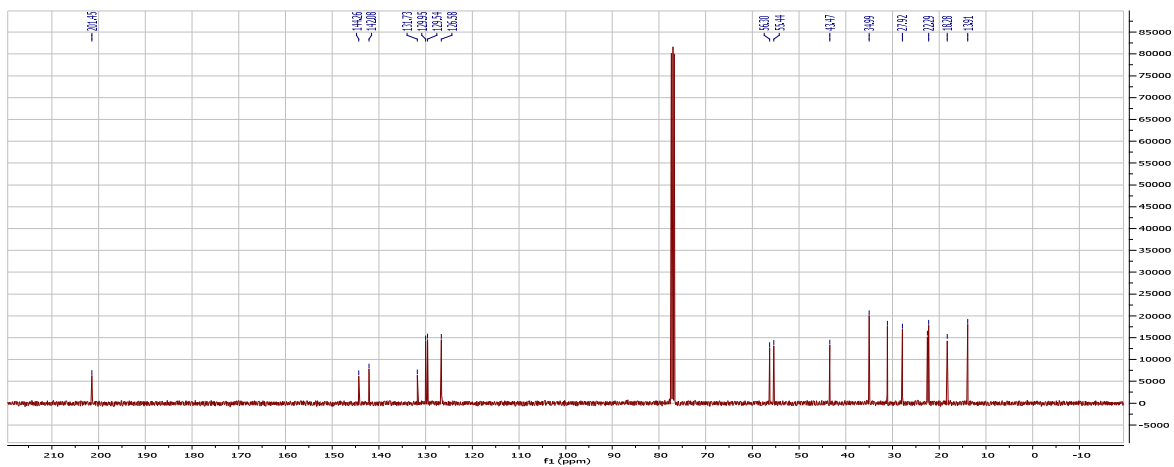

(1) ELSD Signal

131.216

Range: 131.177

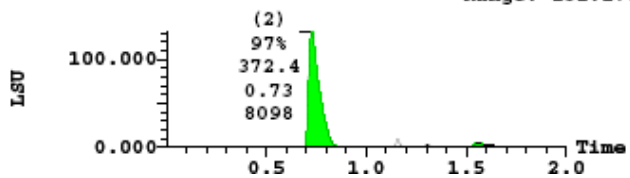

| Peak ID | Compound | Time | Mass Found |
|---------|----------|------|------------|
| 2       | Found    | 0.70 | 372.43     |

2: (Time: 0.70)

1: MS ES+

8.0e+007

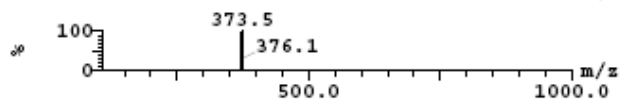

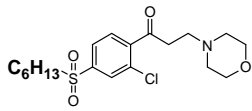

17{3,1,3}

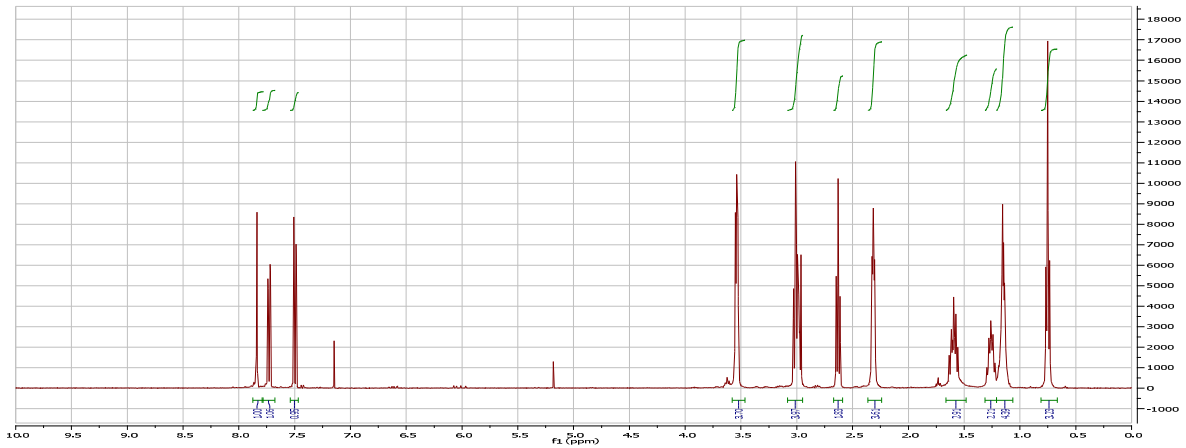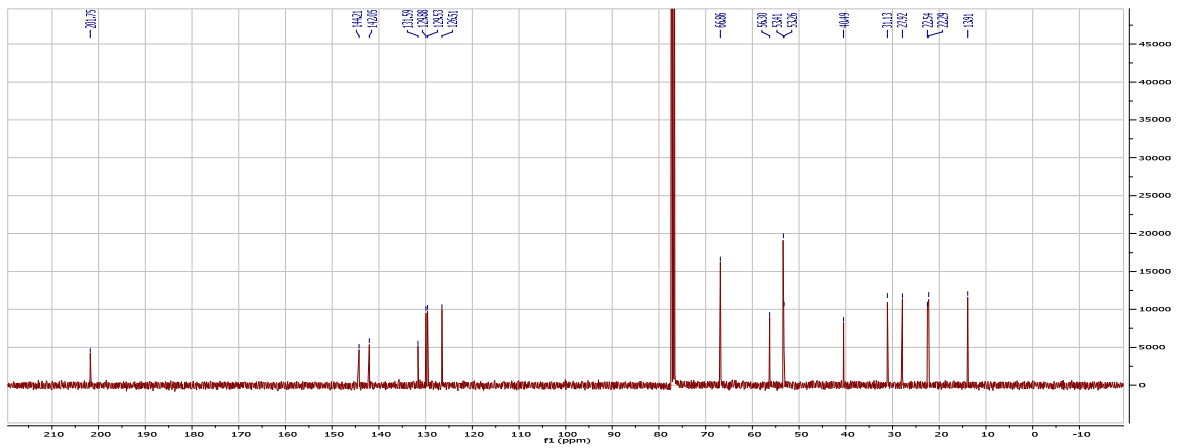

(1) ELSD Signal 487.661  
Range: 487.642

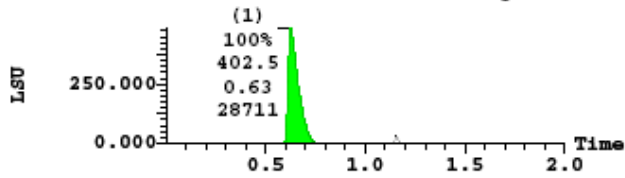

| Peak ID | Compound Found | Time | Mass Found |
|---------|----------------|------|------------|
| 1       | Found          | 0.62 | 402.45     |

1: (Time: 0.62) 1: MS ES+ 1.2e+008

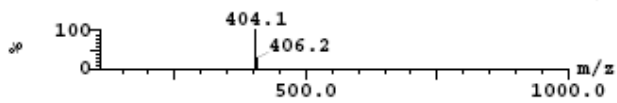

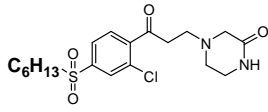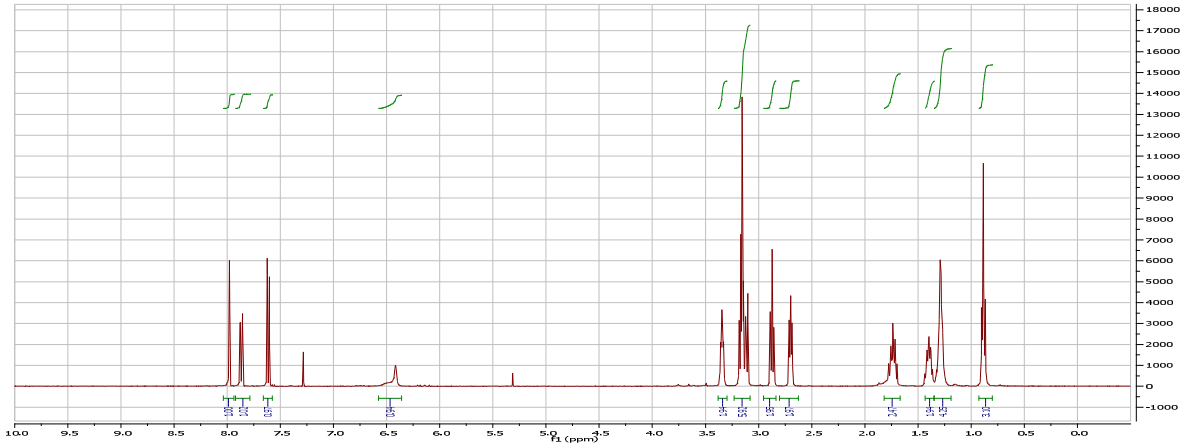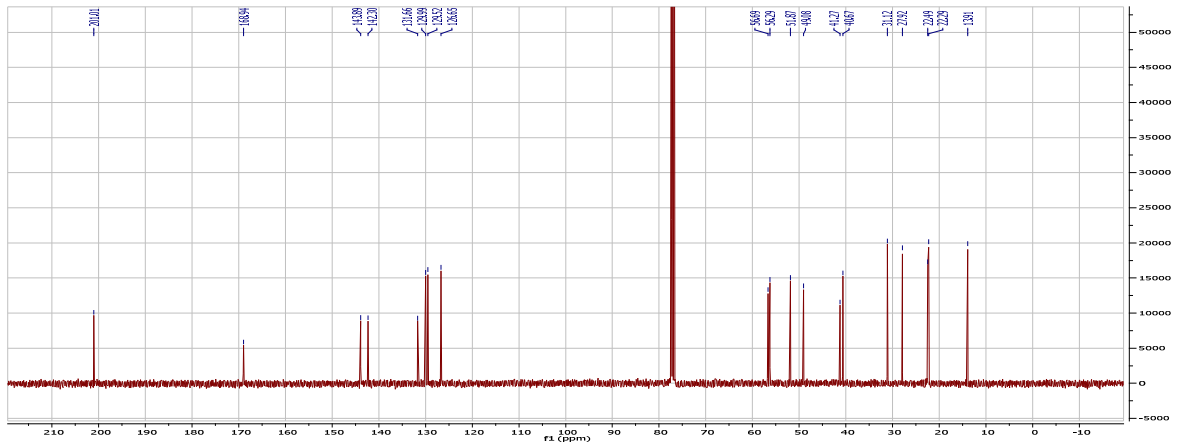

(1) ELSD Signal 1587.138  
 Range: 1587.122

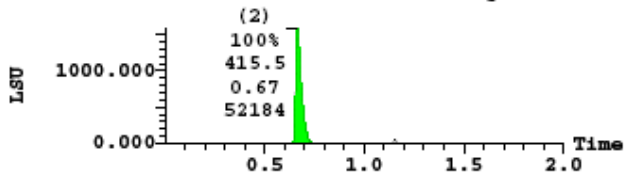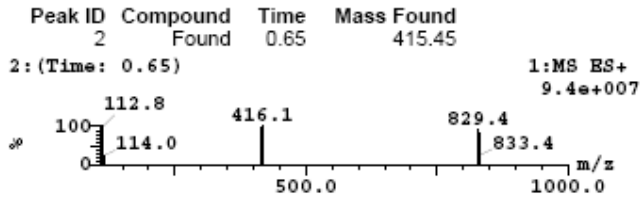

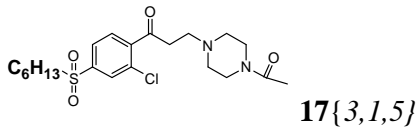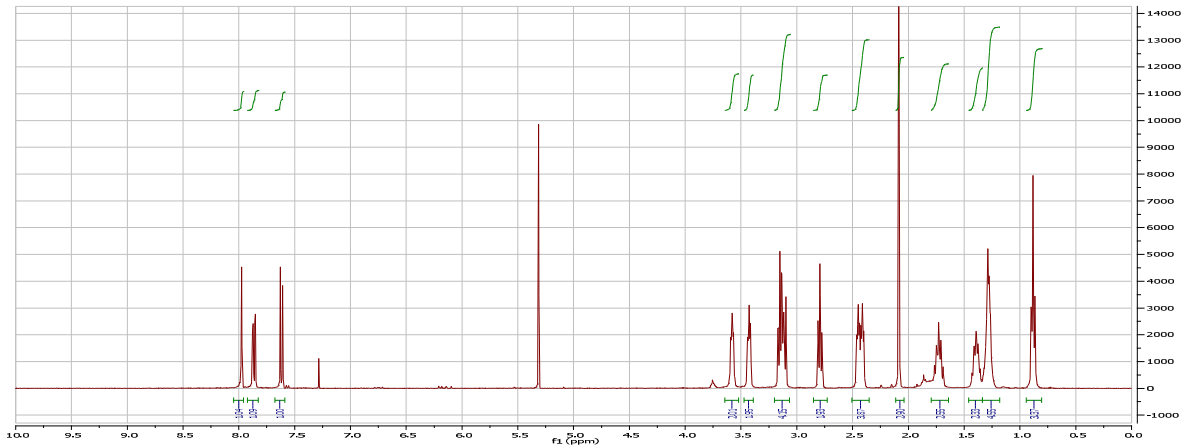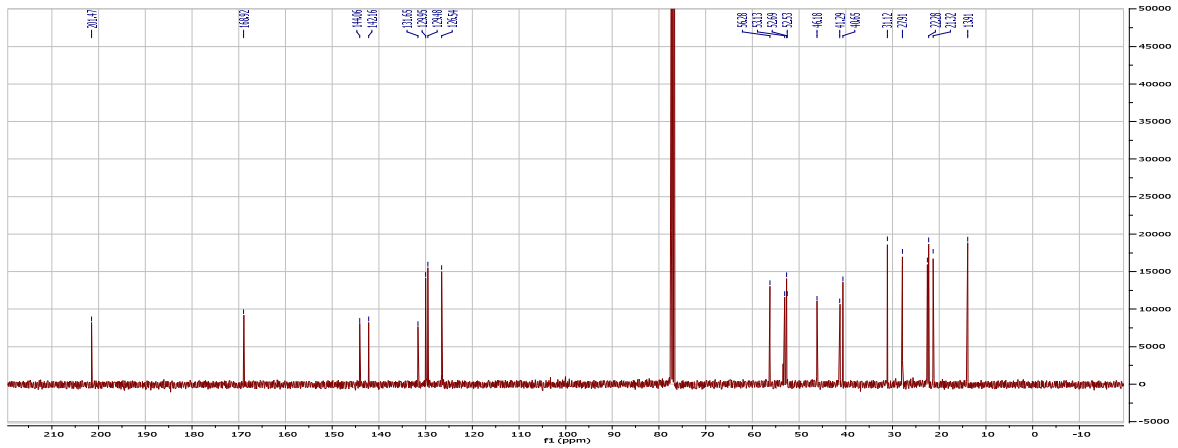

(1) ELSD Signal 543.464  
Range: 543.442

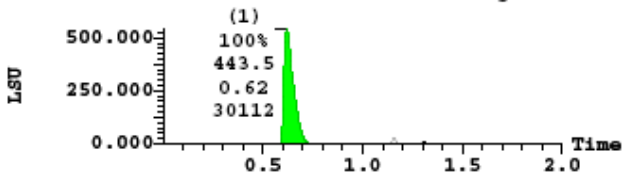

| Peak ID | Compound Found | Time | Mass Found |
|---------|----------------|------|------------|
| 1       | Found          | 0.60 | 443.51     |

1: (Time: 0.60) 1:MS ES+  
1.1e+008

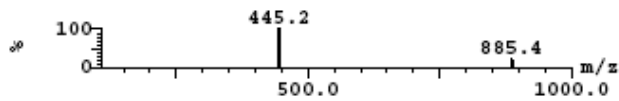

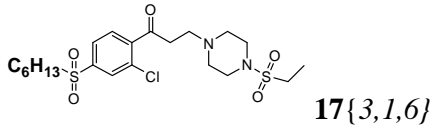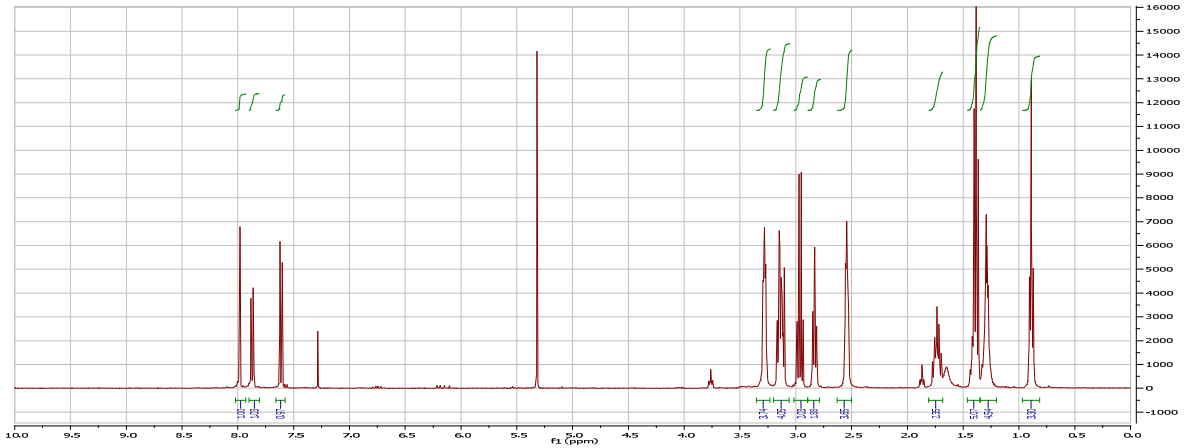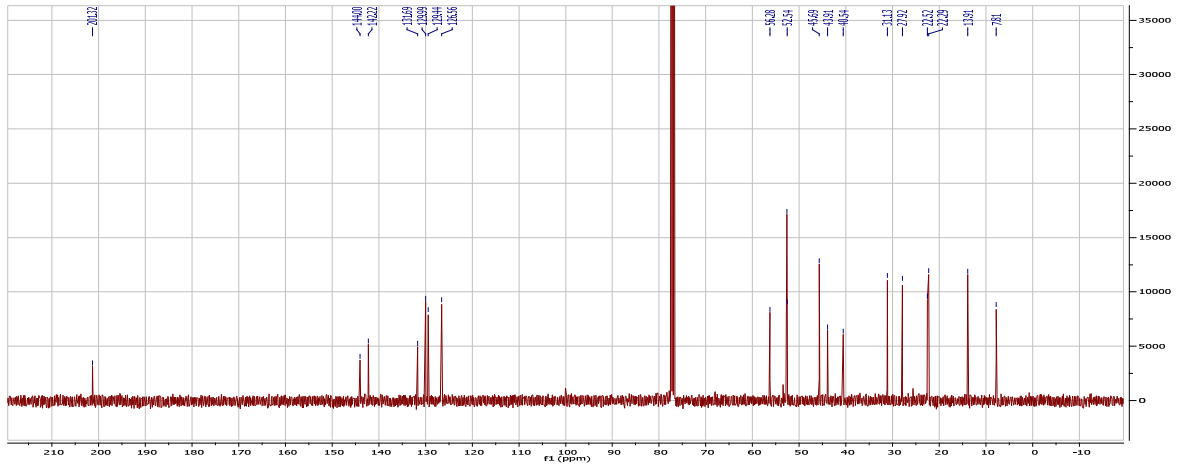

(1) ELSD Signal 654.907  
Range: 654.881

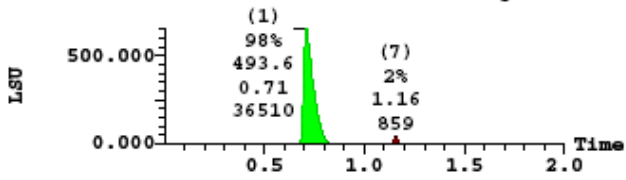

| Peak ID | Compound Found | Time | Mass Found |
|---------|----------------|------|------------|
| 1       | Found          | 0.69 | 493.59     |

1: (Time: 0.69) 1: MS ES+  
9.9e+007

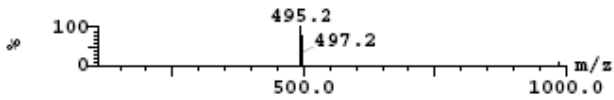

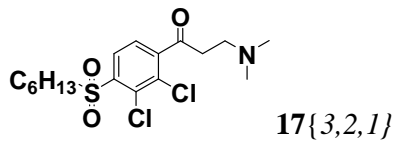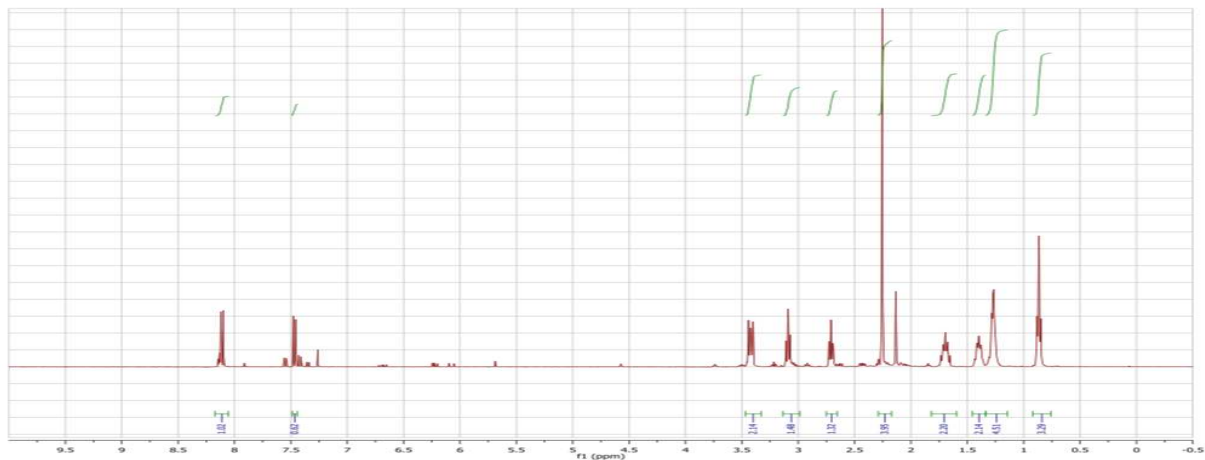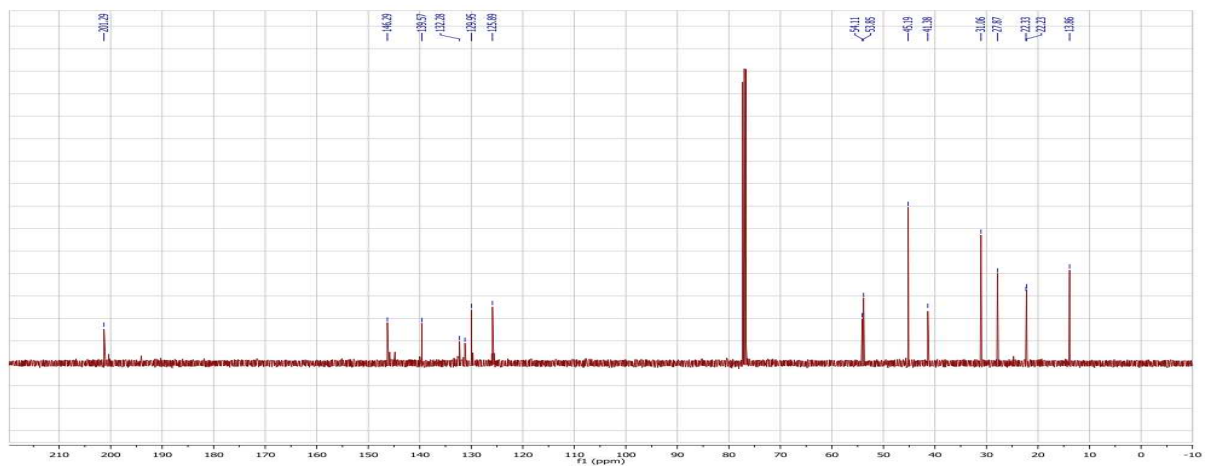

(1) ELSD Signal

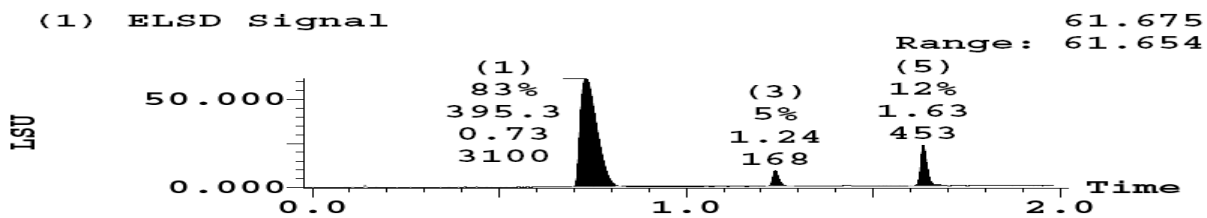

| Peak ID | Compound | Time | Mass Found |
|---------|----------|------|------------|
| 1       | Found    | 0.74 | 395.26     |

1: (Time: 0.74)

1: MS ES+  
9.4e+007

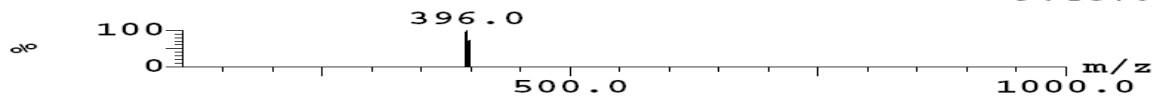



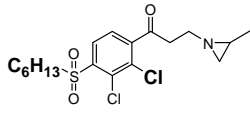

17{3,2,2}

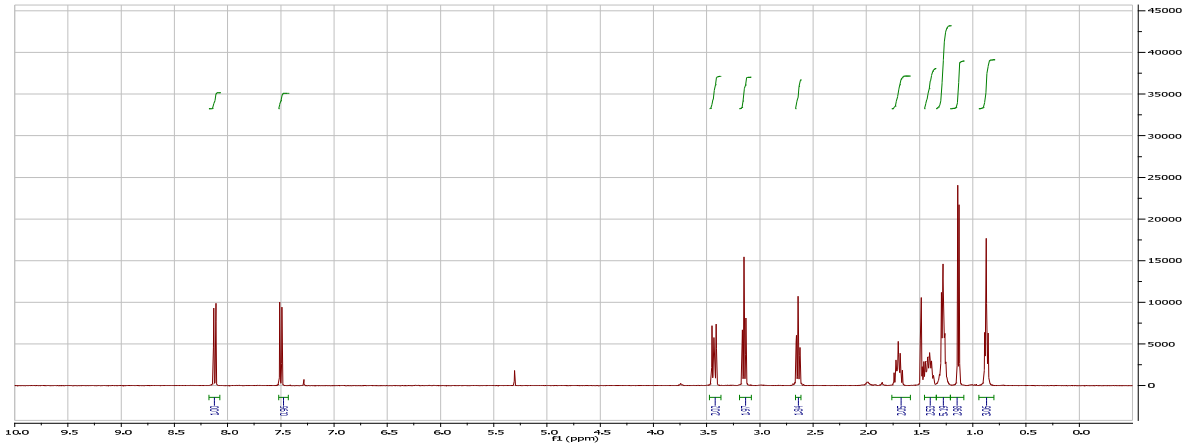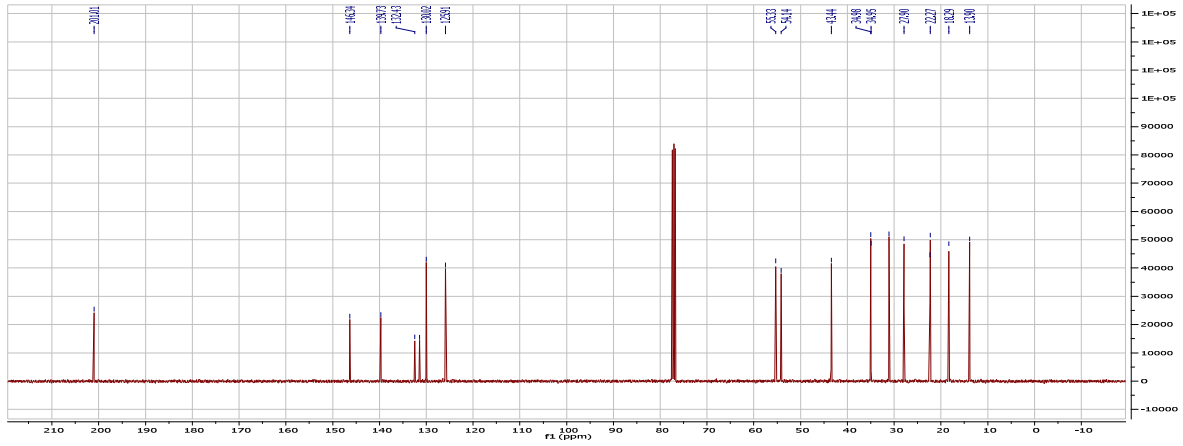

(1) ELSD Signal 502.354  
Range: 502.314

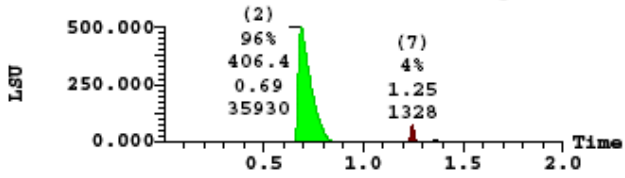

| Peak ID | Compound | Time | Mass Found |
|---------|----------|------|------------|
| 4       | Found    | 0.77 | 406.37     |

1:MS ES+  
6.5e+007

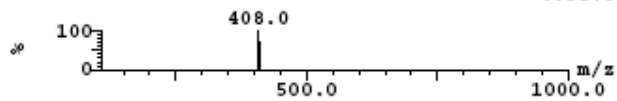

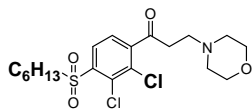

17{3,2,3}

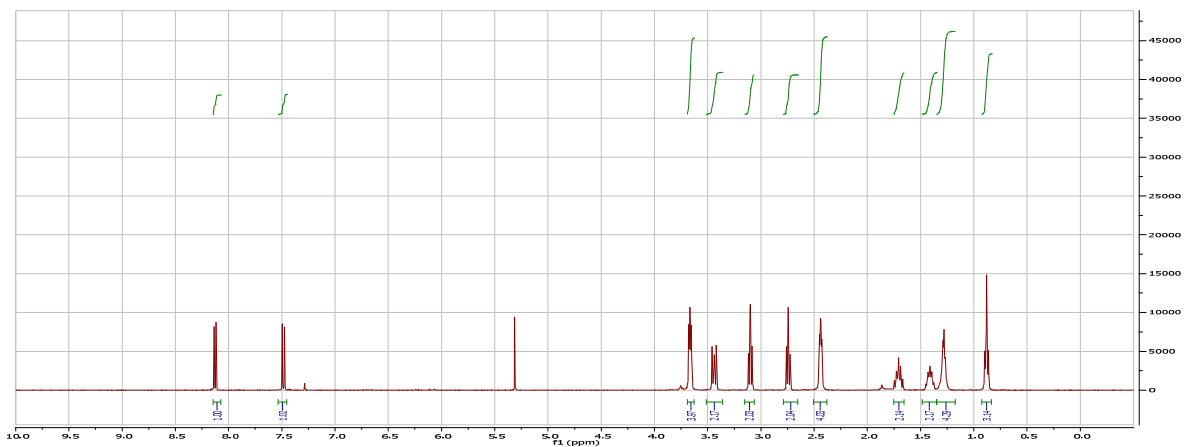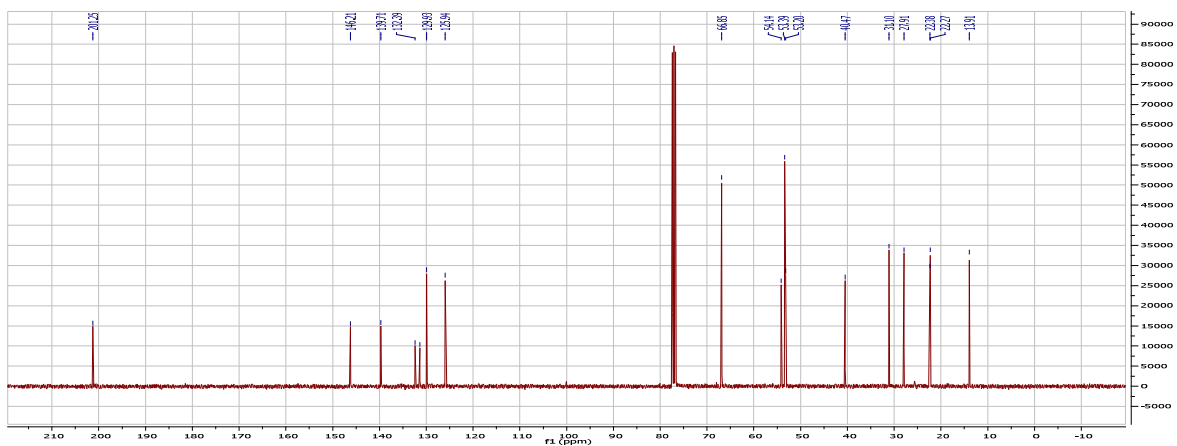

(1) ELSD Signal

542.988

Range: 542.967

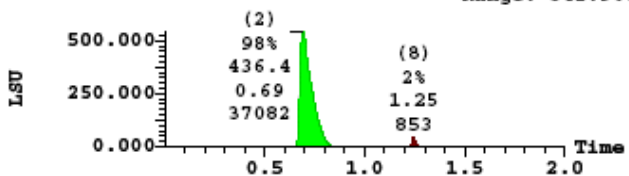

| Peak ID | Compound Found | Time | Mass Found |
|---------|----------------|------|------------|
| 2       | Found          | 0.68 | 436.40     |

2: (Time: 0.68)

1: MS ES+

1.1e+008

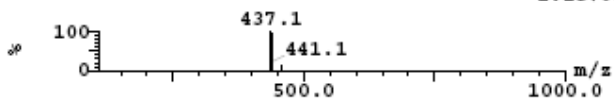

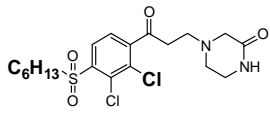

17{3,2,4}

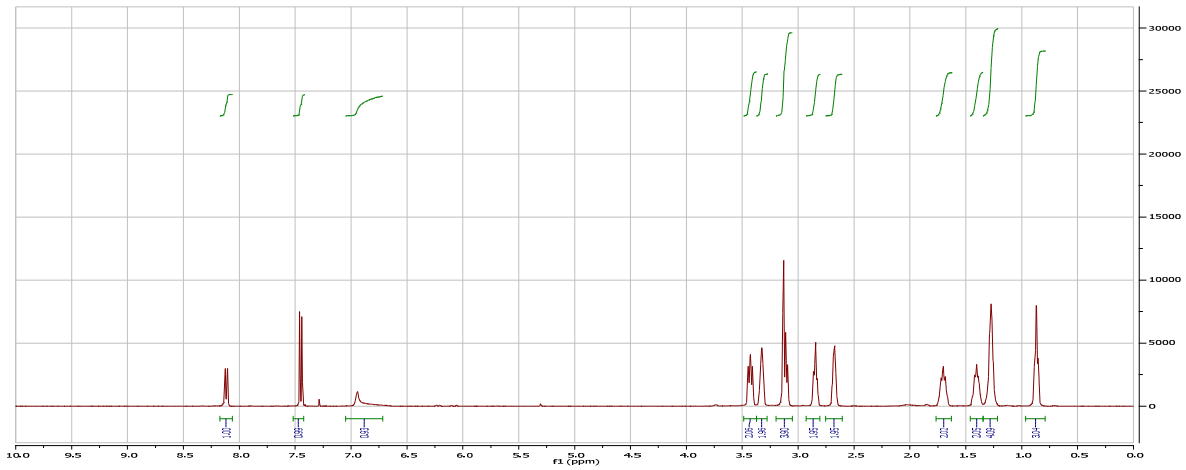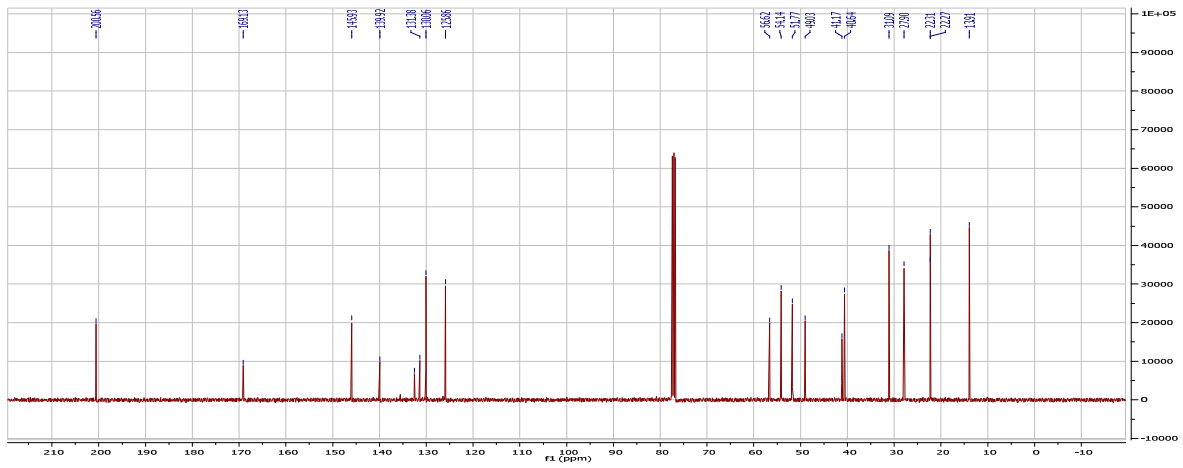

(1) ELSD Signal

1743.555

Range: 1743.520

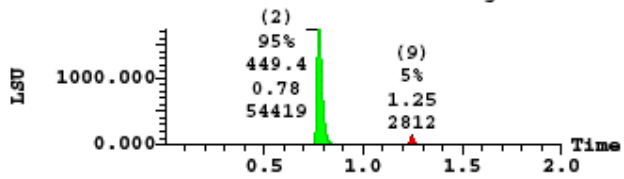

| Peak ID | Compound Found | Time | Mass Found |
|---------|----------------|------|------------|
| 2       | Found          | 0.76 | 449.40     |

2: (Time: 0.76)

1: MS ES+  
1.0e+008

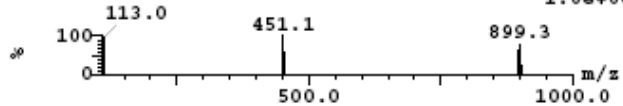

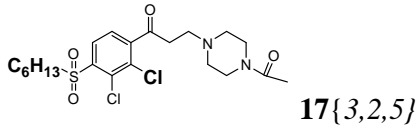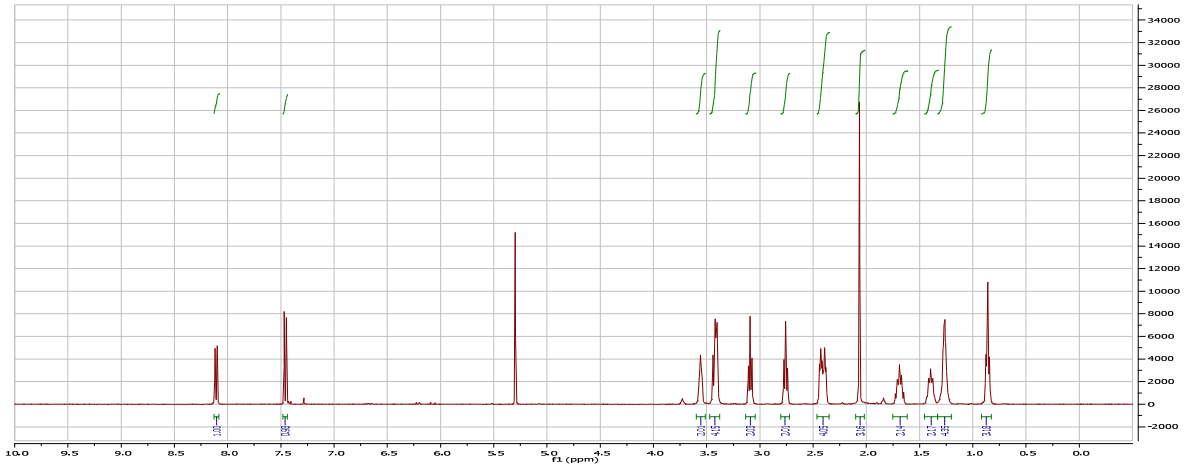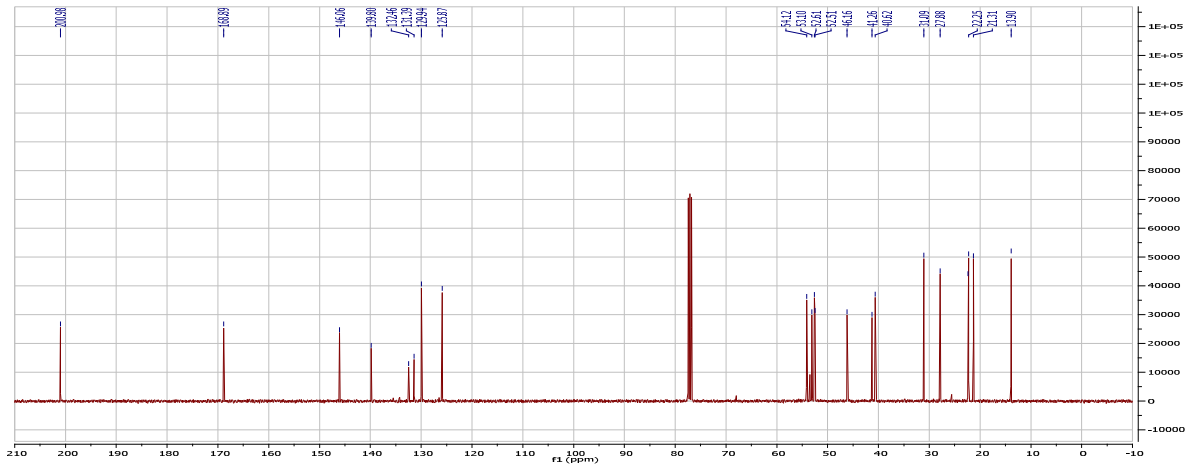

(1) ELSD Signal 655.307  
 Range: 655.287

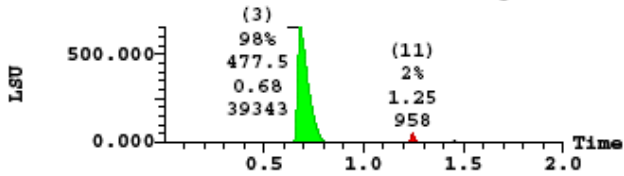

| Peak ID | Compound Found | Time | Mass Found |
|---------|----------------|------|------------|
| 3       | Found          | 0.66 | 477.45     |

1:MS ES+  
9.6e+007

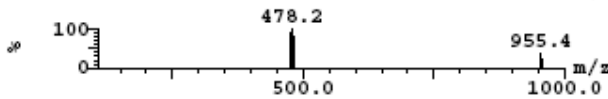

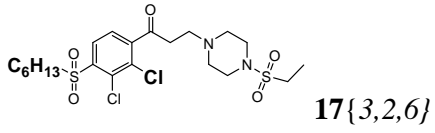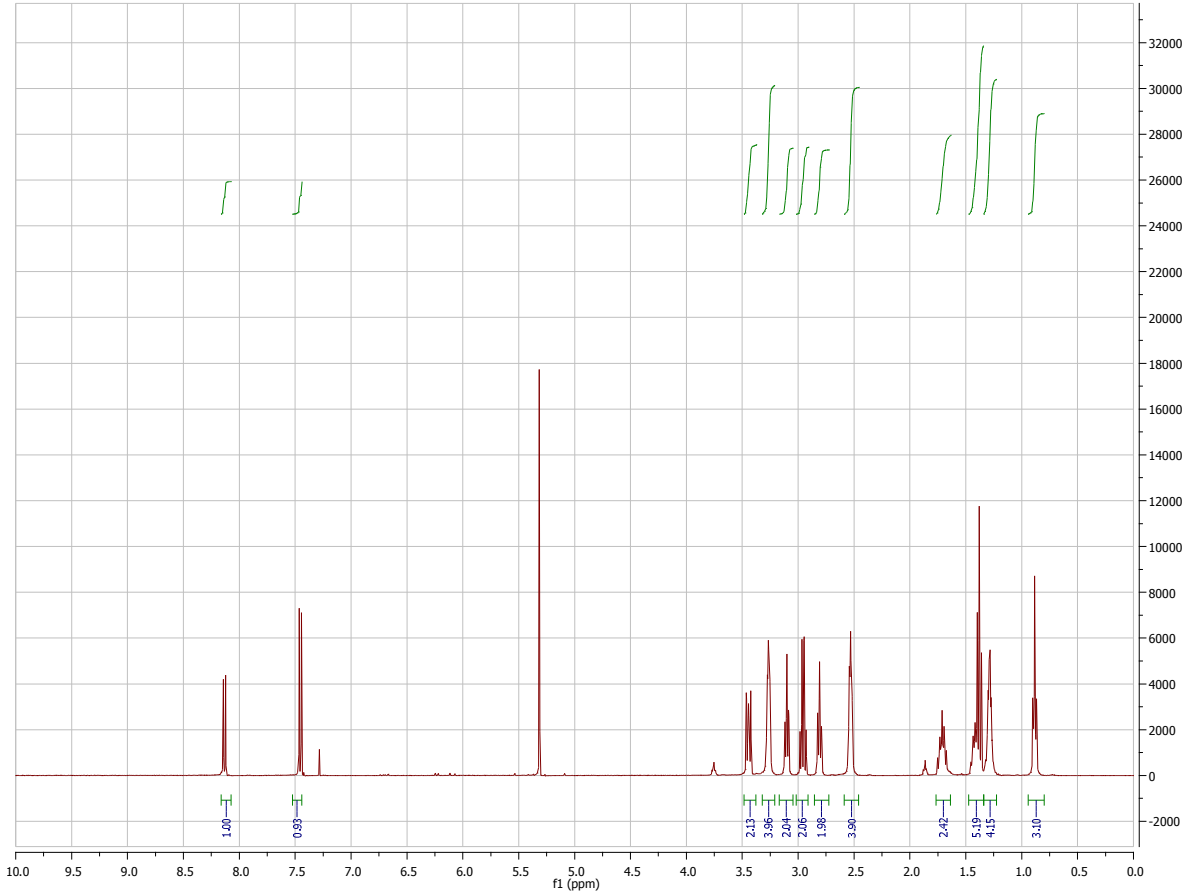

(1) ELSD Signal 753.702  
Range: 753.695

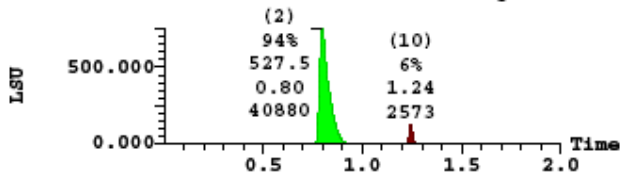

| Peak ID | Compound | Time | Mass Found |
|---------|----------|------|------------|
| 2       | Found    | 0.81 | 527.53     |

2: (Time: 0.81) 1:MS ES+  
1.3e+008

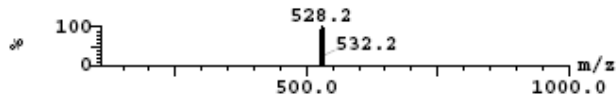

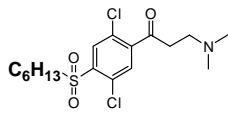

17{3,3,1}

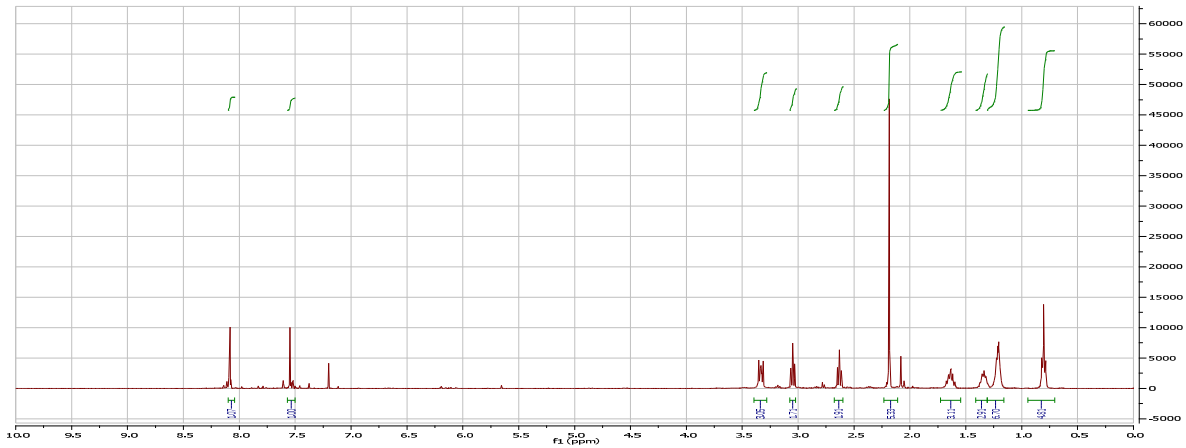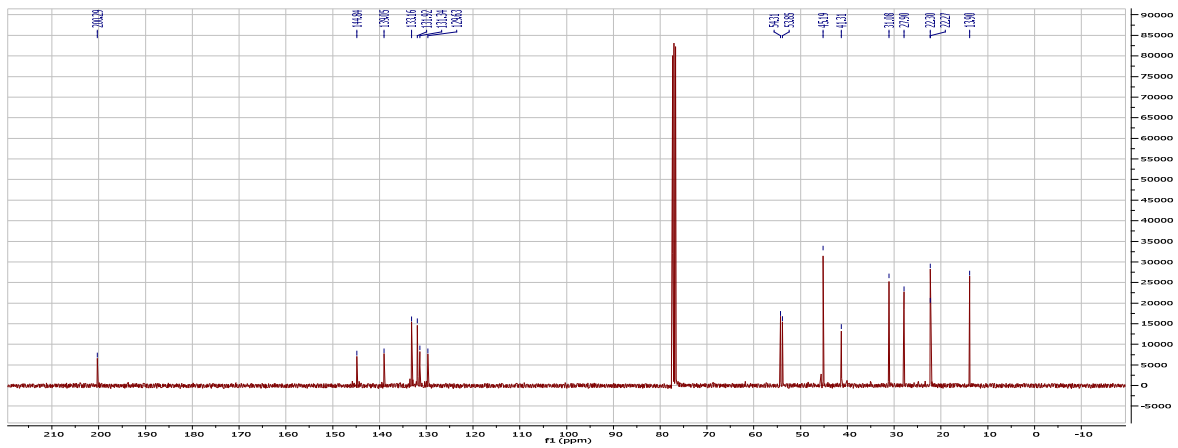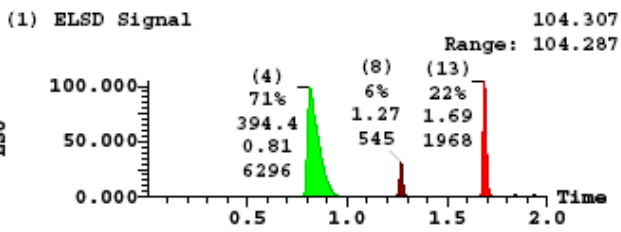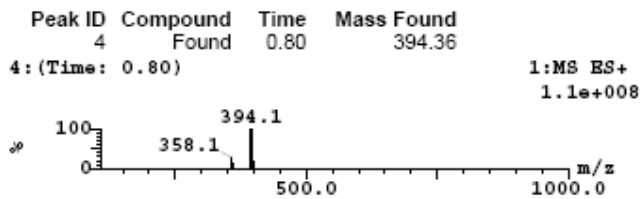

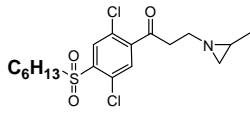

17{3,3,2}

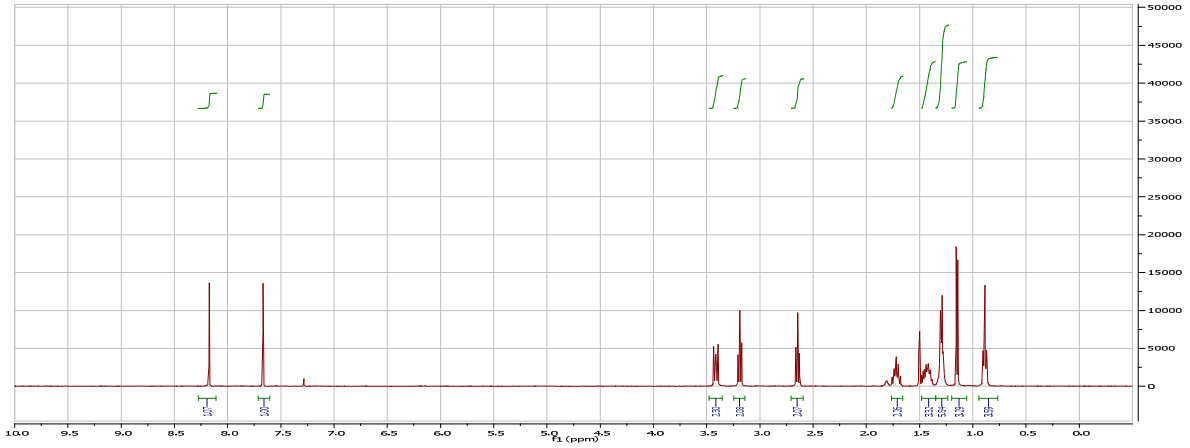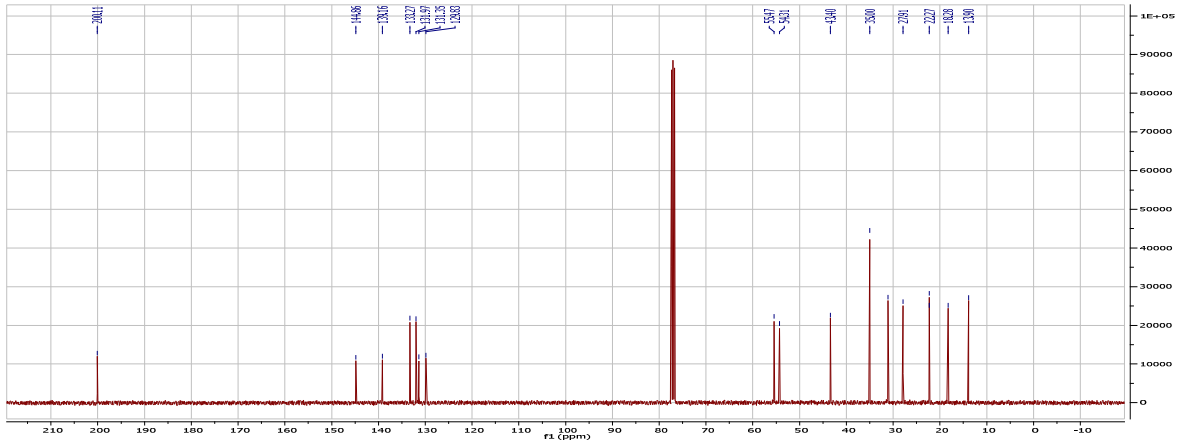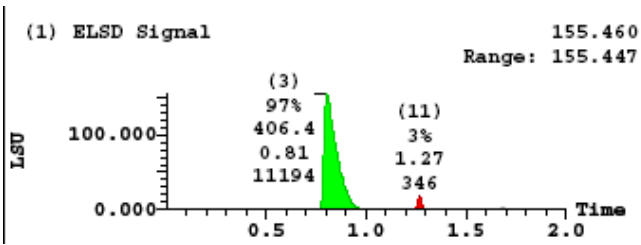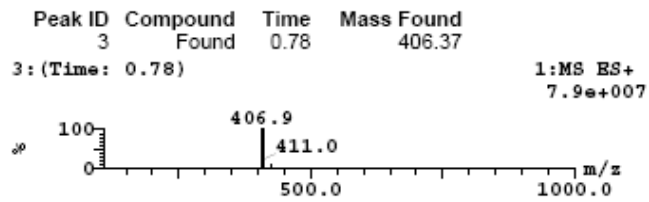

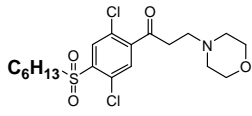

17{3,3,3}

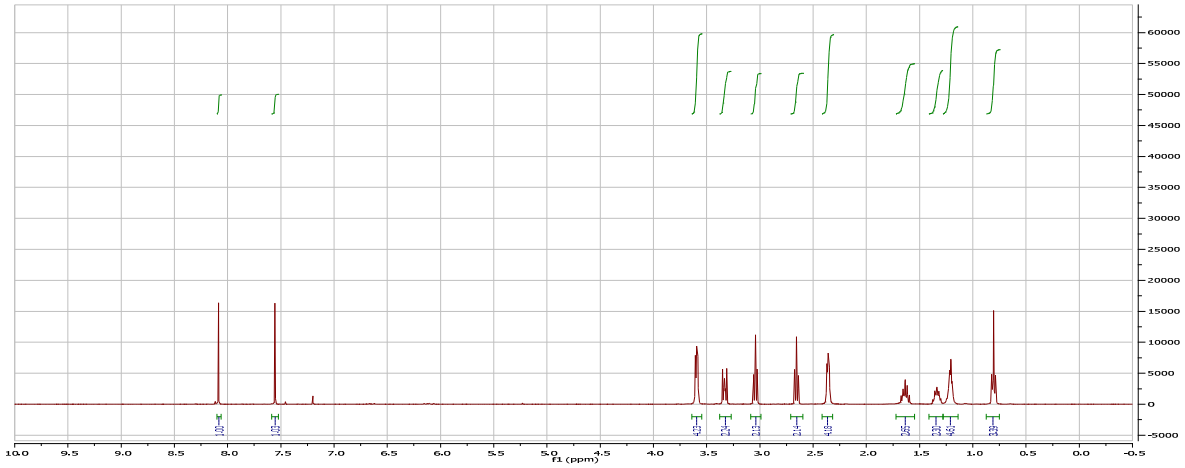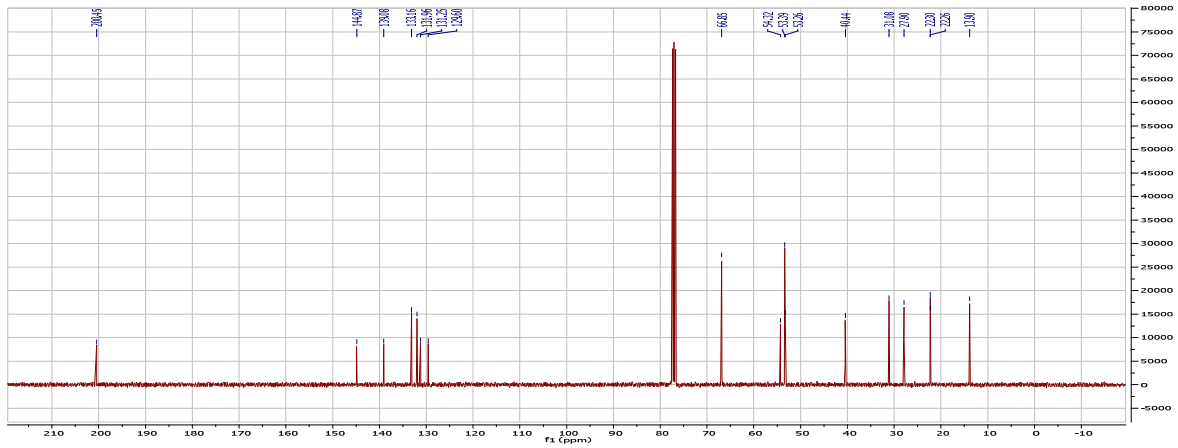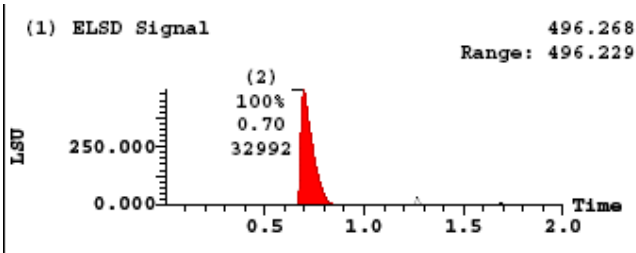

| Peak ID | Compound | Time | Mass Found |
|---------|----------|------|------------|
| 3       | Found    | 0.72 | 436.40     |

3: (Time: 0.72) 1: MS ES+  
9.9e+007

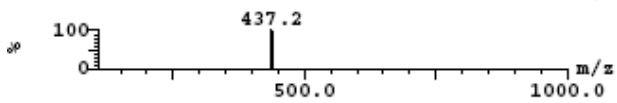



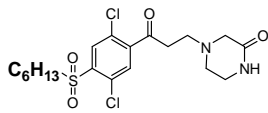

17{3,3,4}

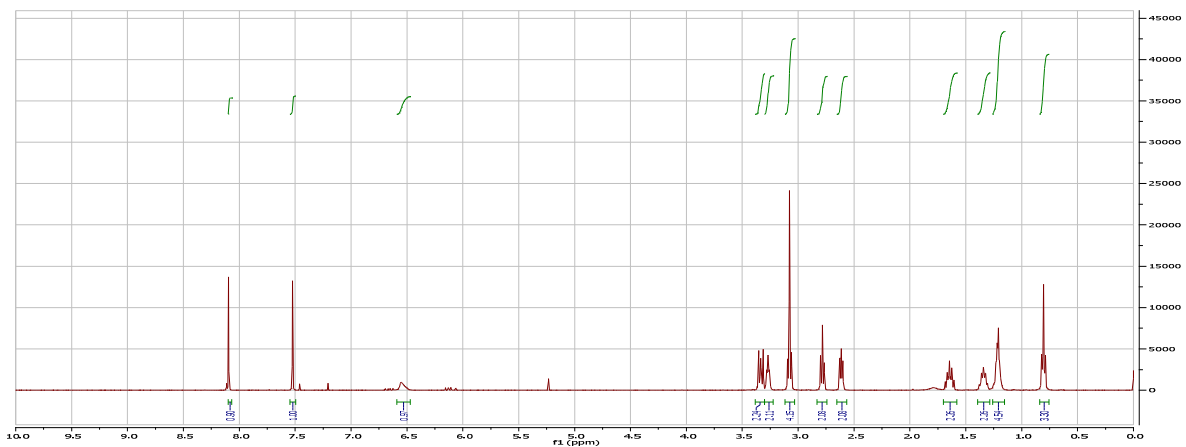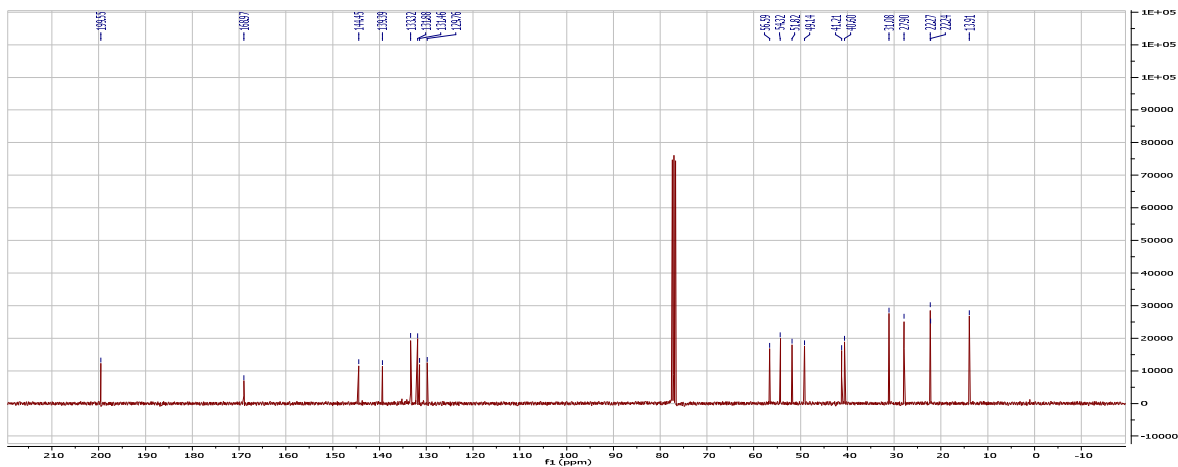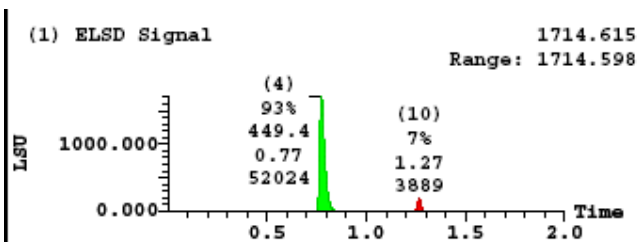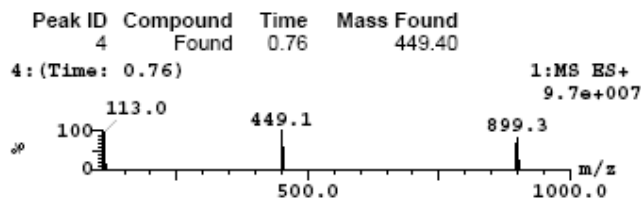

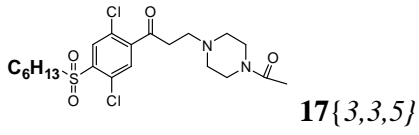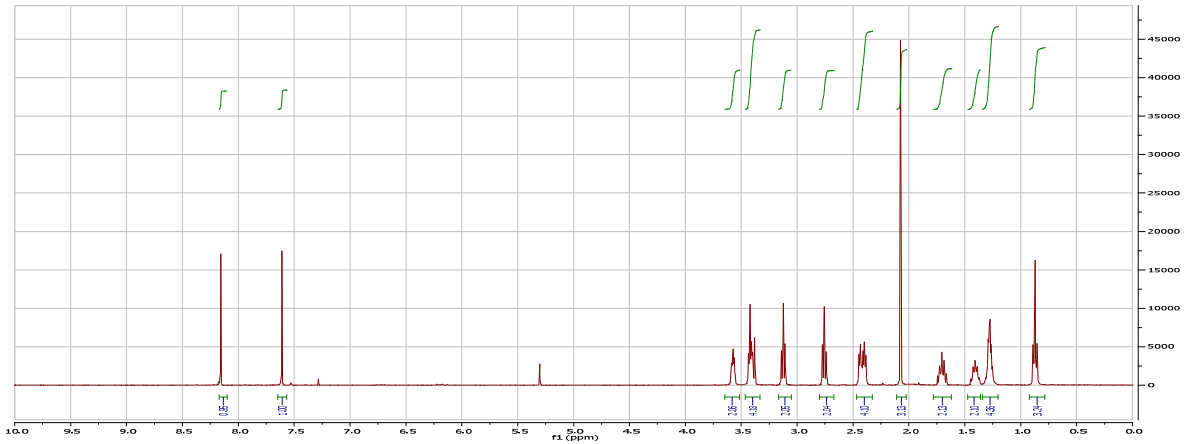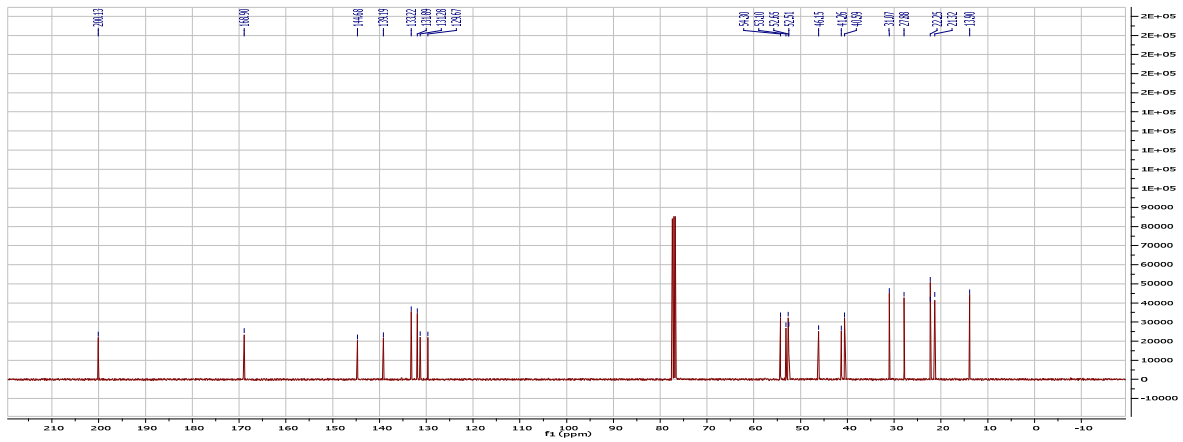

(1) ELSD Signal 539.990  
 Range: 539.979

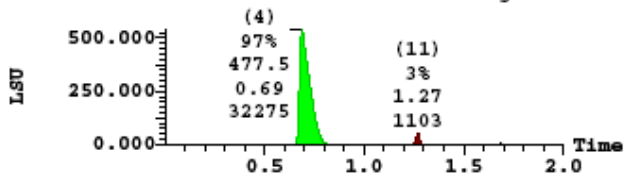

| Peak ID | Compound | Time | Mass Found |
|---------|----------|------|------------|
| 4       | Found    | 0.67 | 477.45     |

4: (Time: 0.67) 1:MS ES+  
1.1e+008

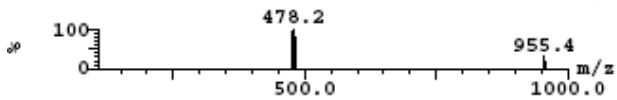

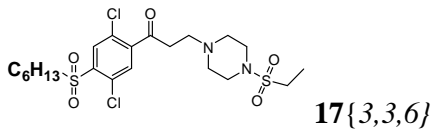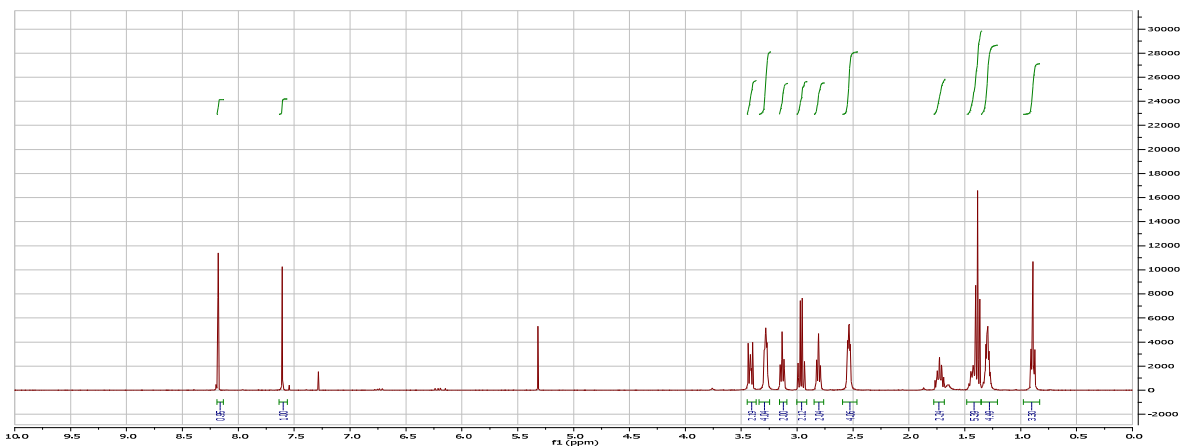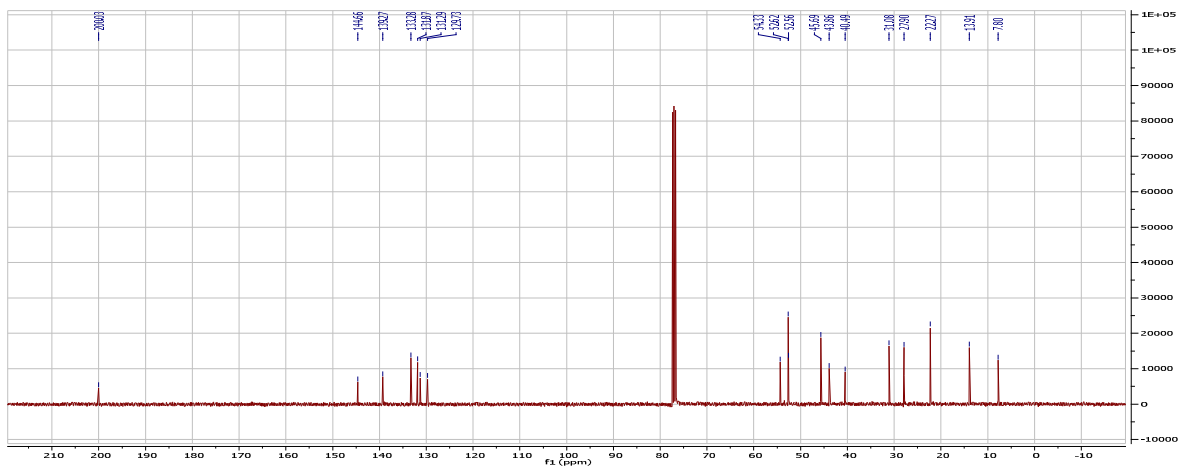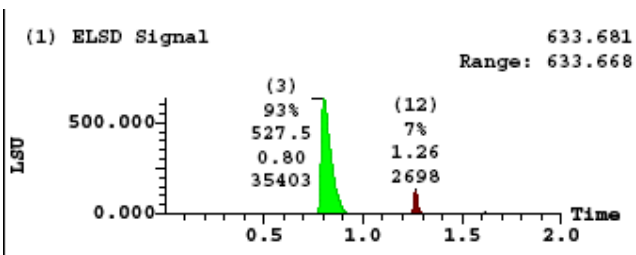

| Peak ID | Compound | Time | Mass Found |
|---------|----------|------|------------|
| 3       | Found    | 0.78 | 527.53     |

3: (Time: 0.78) 1:MS ES+  
8.7e+007

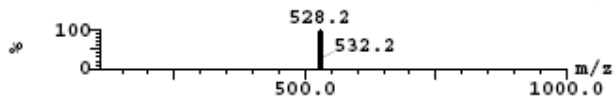

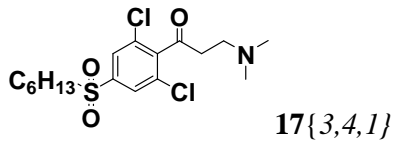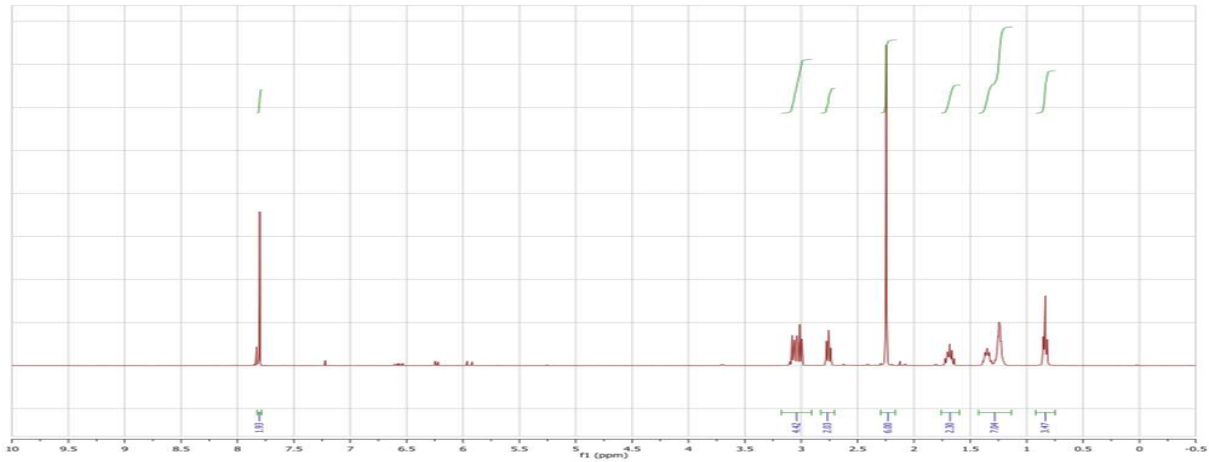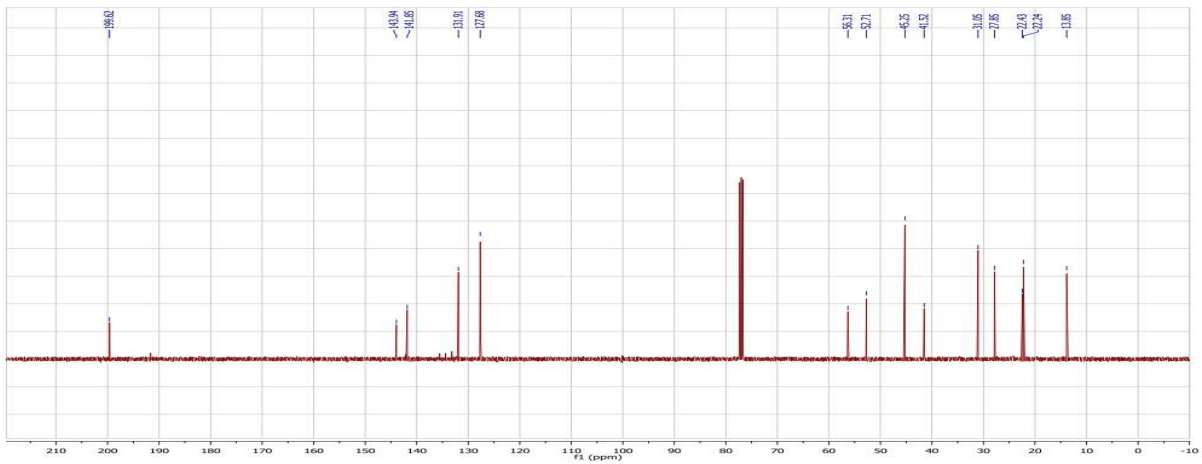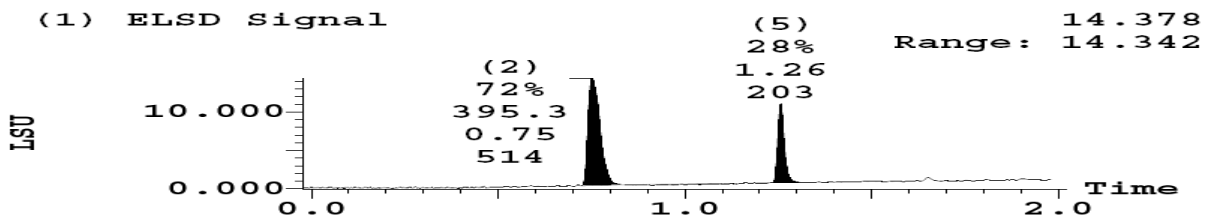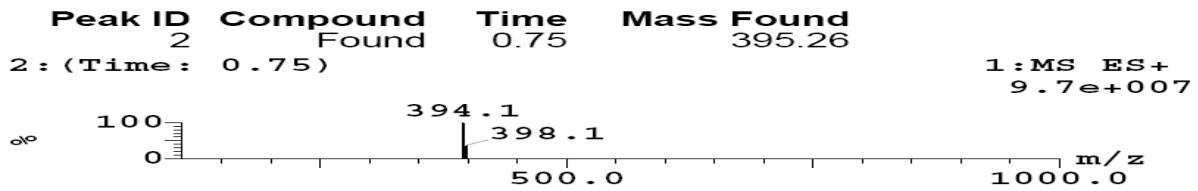

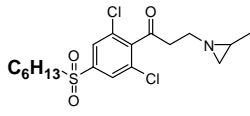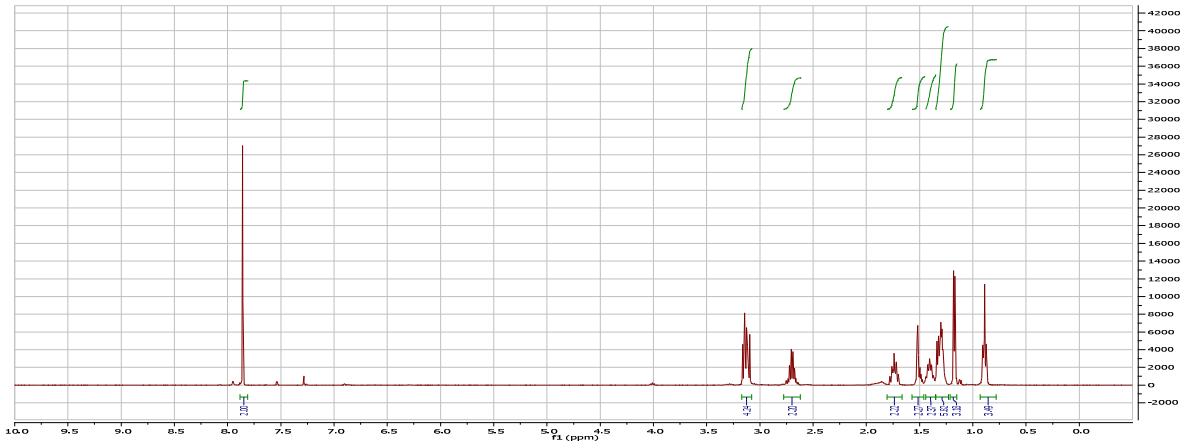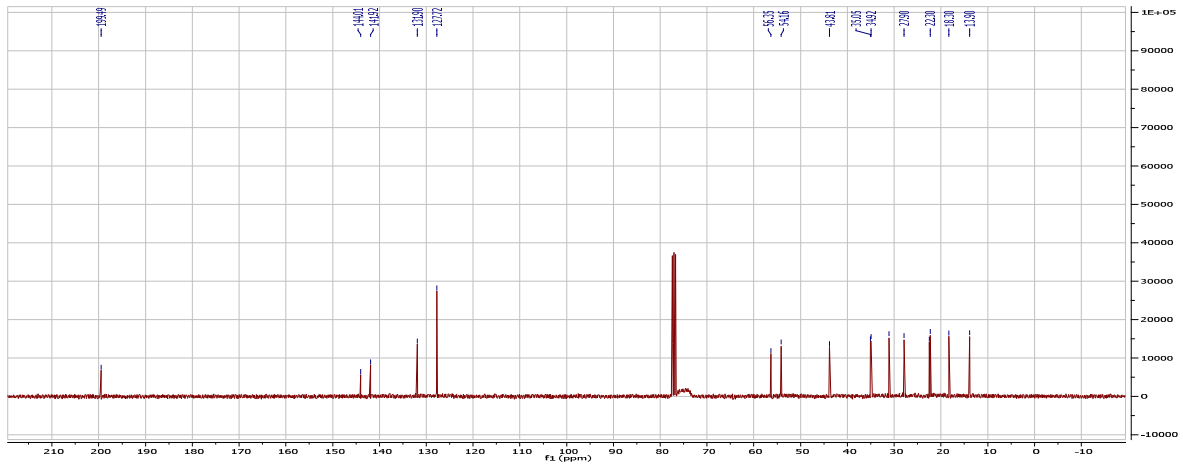

(1) ELSD Signal 489.209  
 Range: 489.200

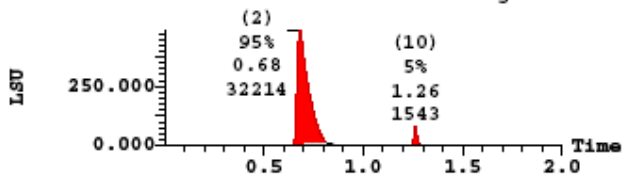

| Peak ID | Compound | Time | Mass Found |
|---------|----------|------|------------|
| 3       | Found    | 0.75 | 406.37     |

3: (Time: 0.75) 1:MS ES+  
1.3e+008

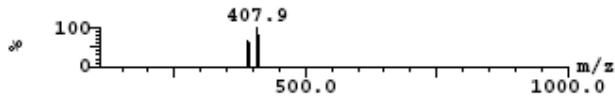

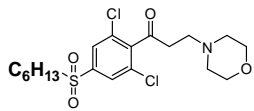

17{3,4,3}

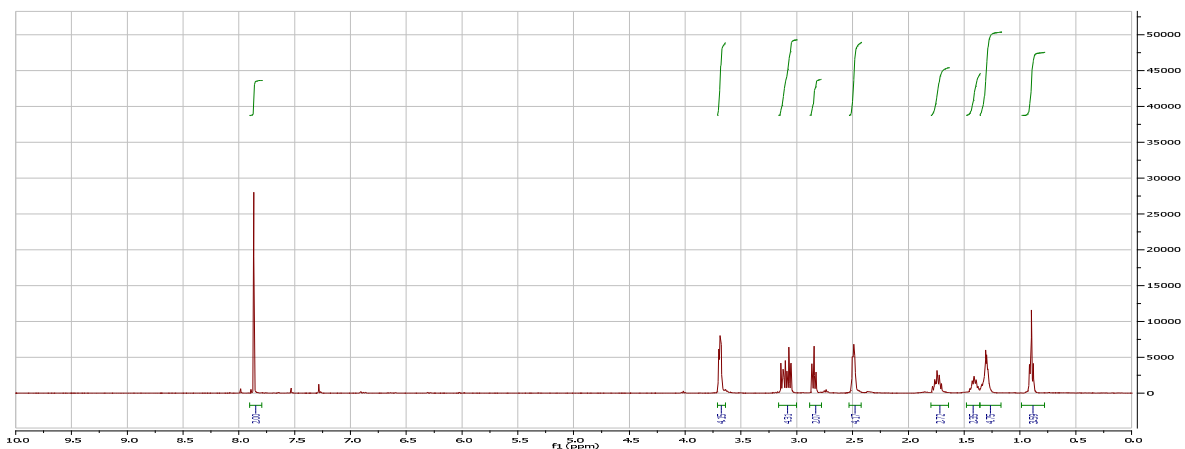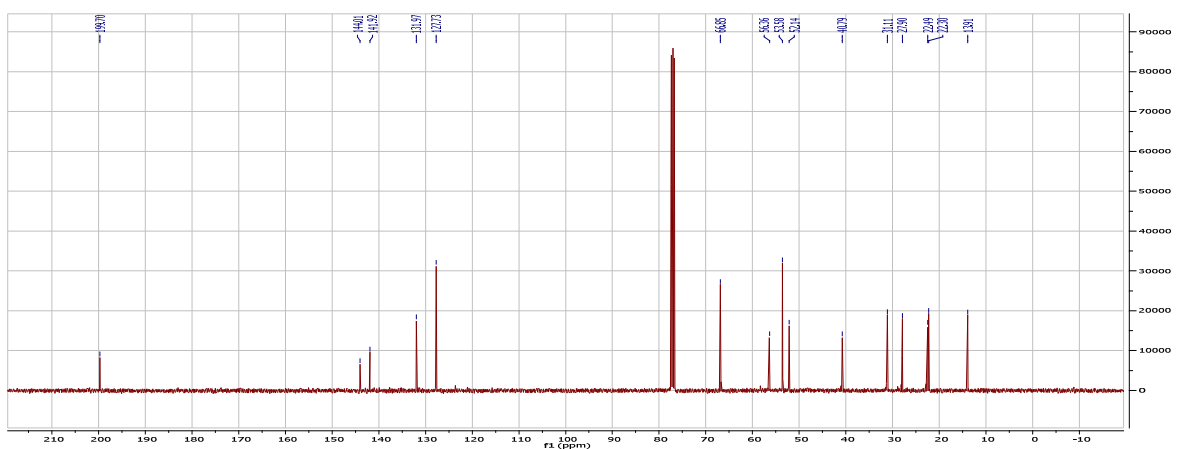

(1) ELSD Signal 597.025  
Range: 597.007

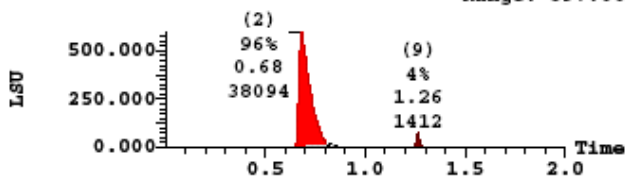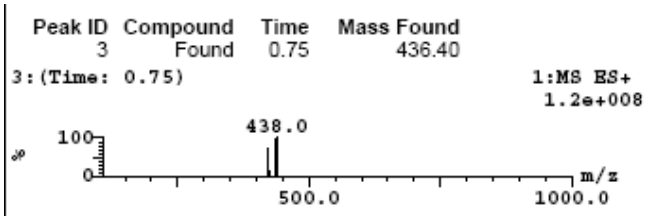

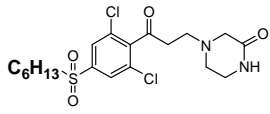

17{3,4,4}

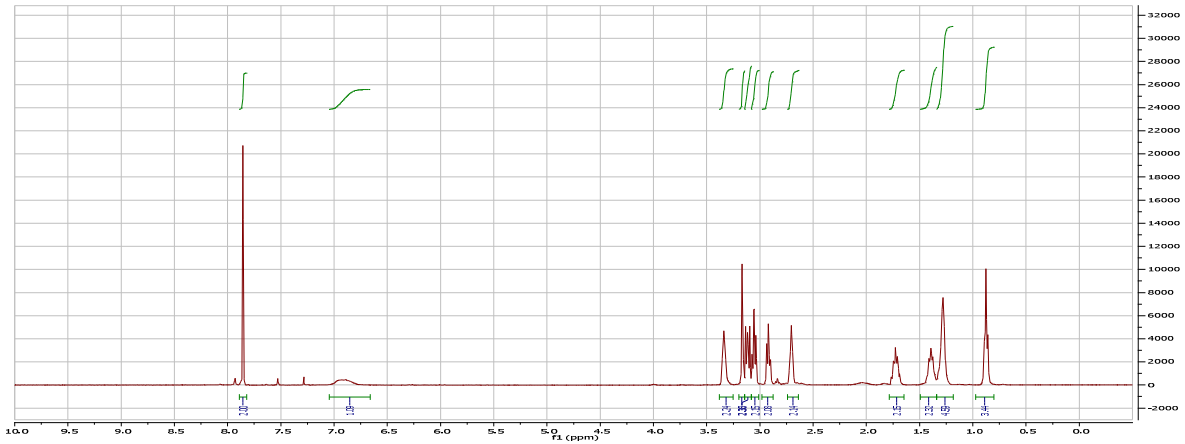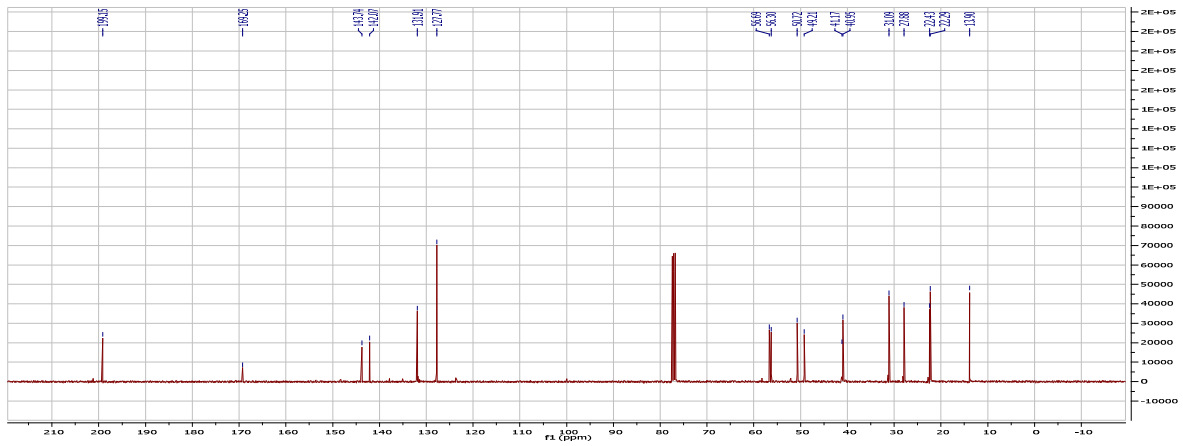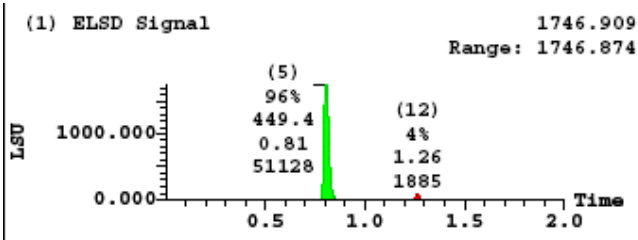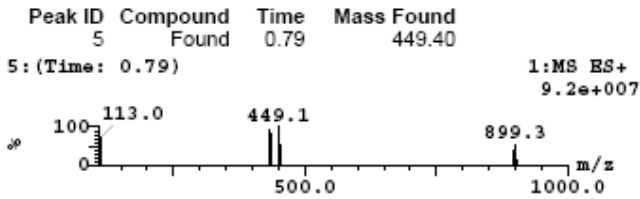

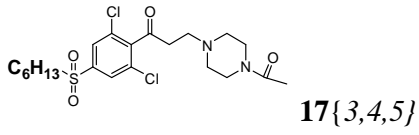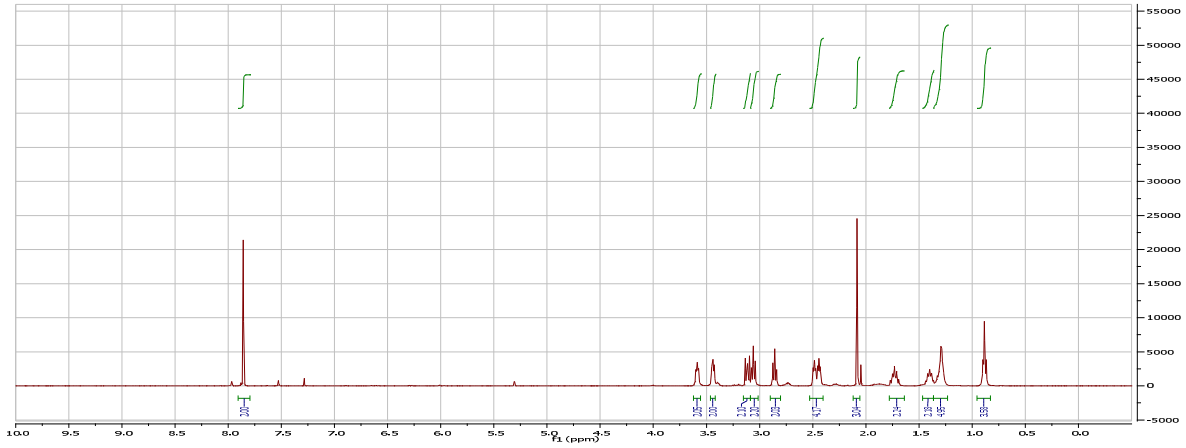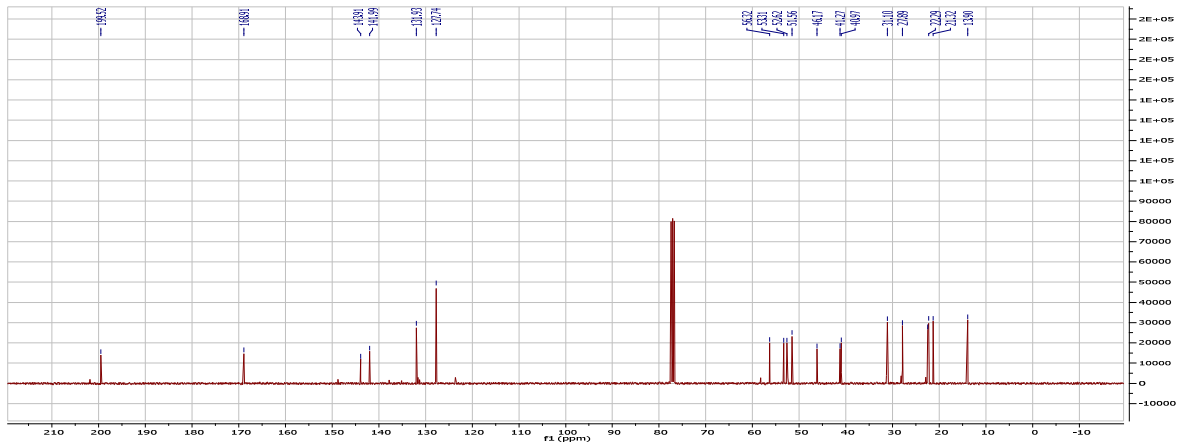

(1) ELSD Signal

648.330  
Range: 648.304

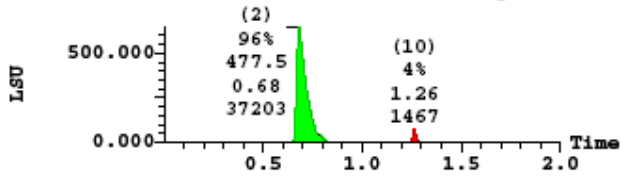

| Peak ID | Compound | Time | Mass Found |
|---------|----------|------|------------|
| 3       | Found    | 0.72 | 477.45     |

3: (Time: 0.72) 1: MS ES+  
1.3e+008

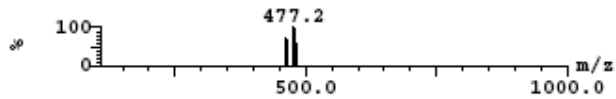



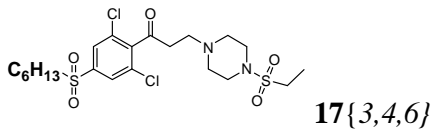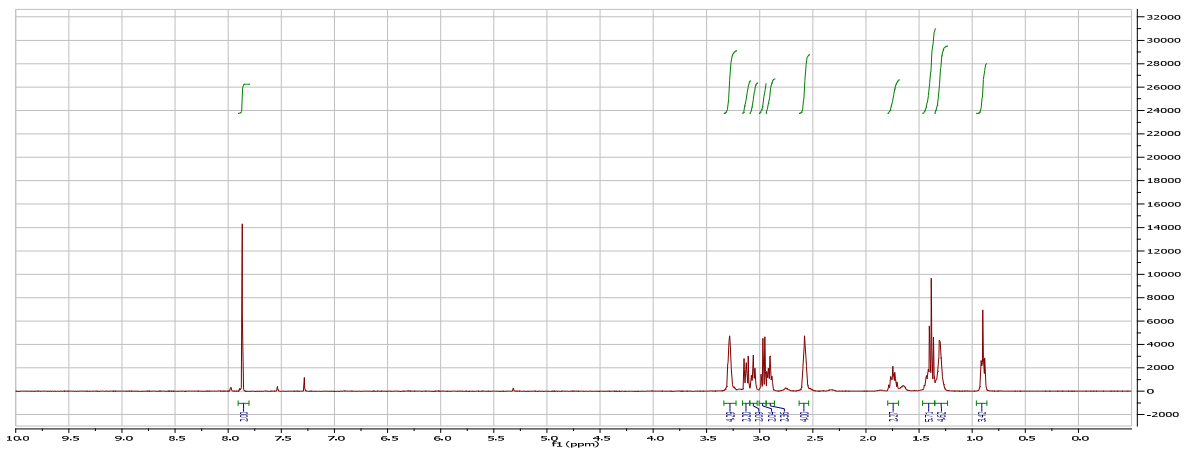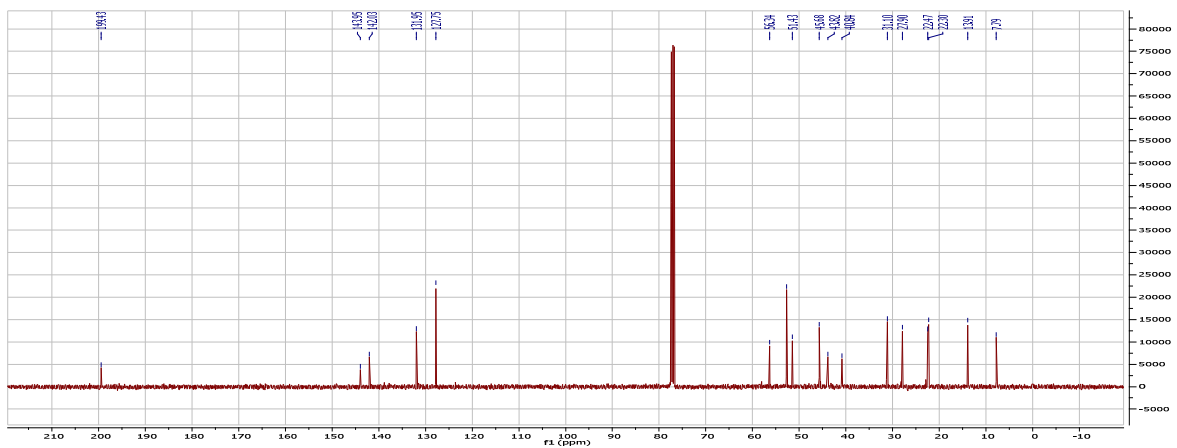

(1) ELSD Signal 979.472  
Range: 979.463

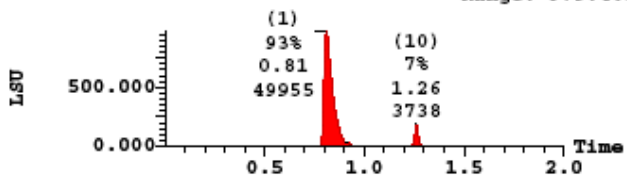

| Peak ID | Compound Found | Time | Mass Found |
|---------|----------------|------|------------|
| 2       | Found          | 0.85 | 527.53     |

2: (Time: 0.85) 1: MS ES+  
1.3e+008

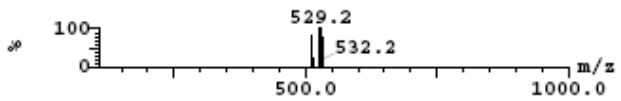

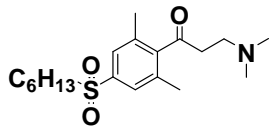

17{3,5,1}

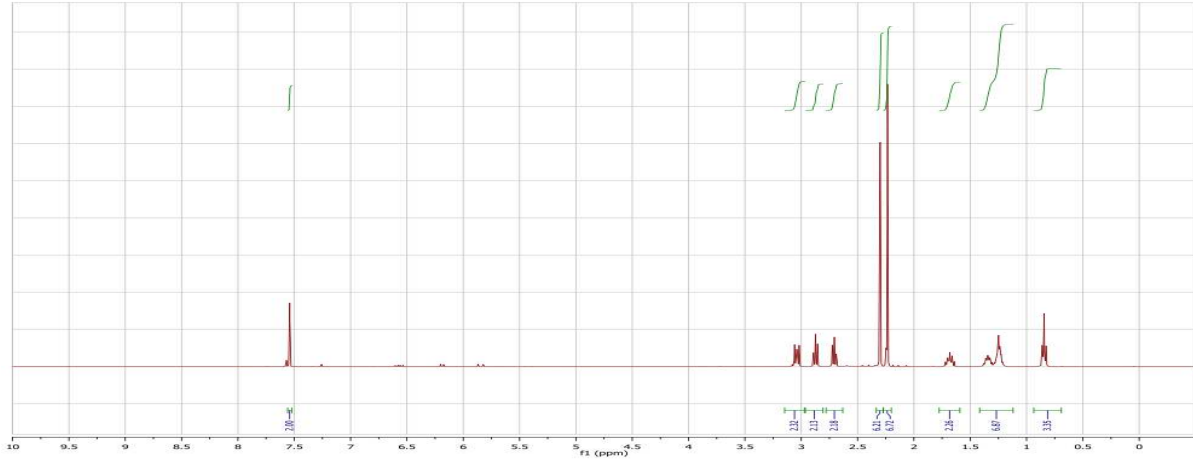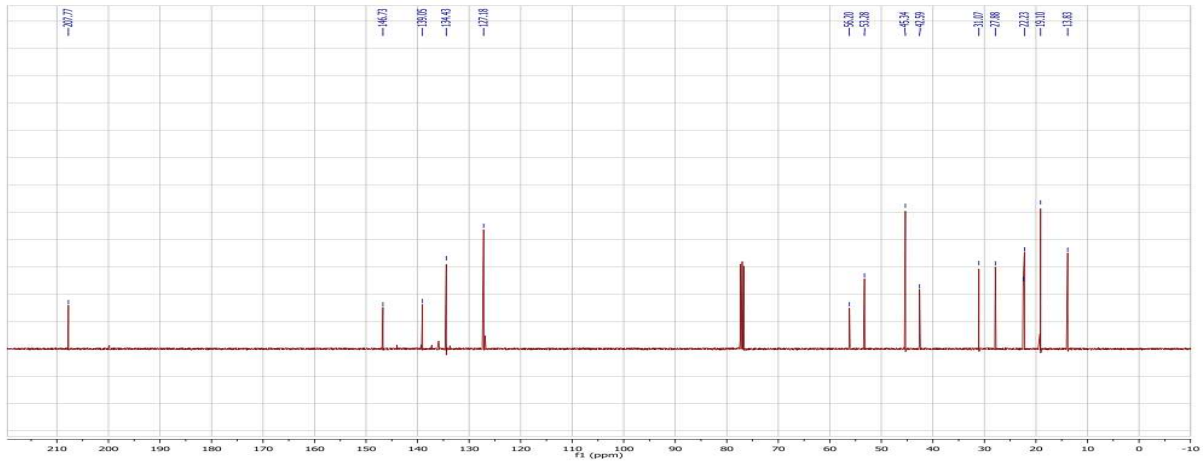

(1) ELSD Signal

230.699  
Range: 230.688

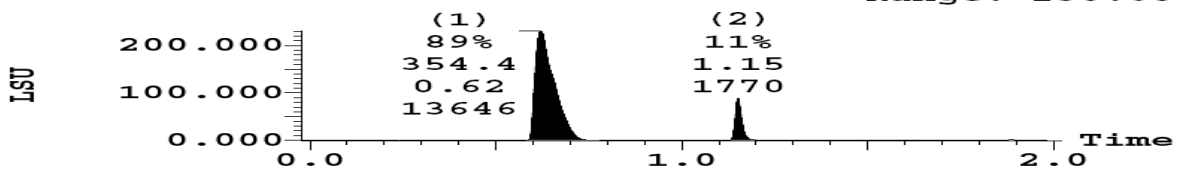

| Peak ID | Compound Found | Time | Mass Found |
|---------|----------------|------|------------|
| 1       | Found          | 0.62 | 354.42     |

1: (Time: 0.62)

1:MS ES+  
1.1e+008

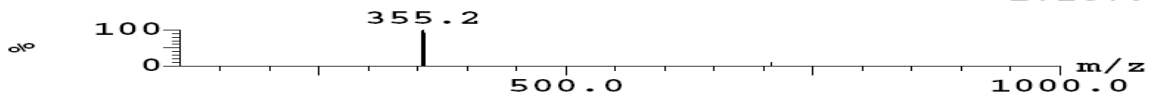

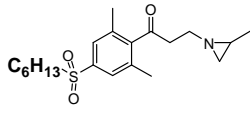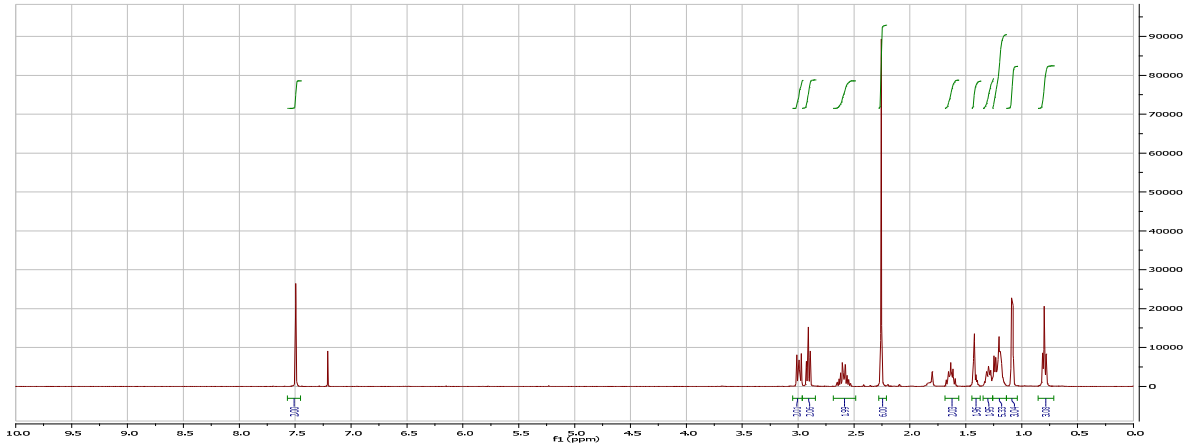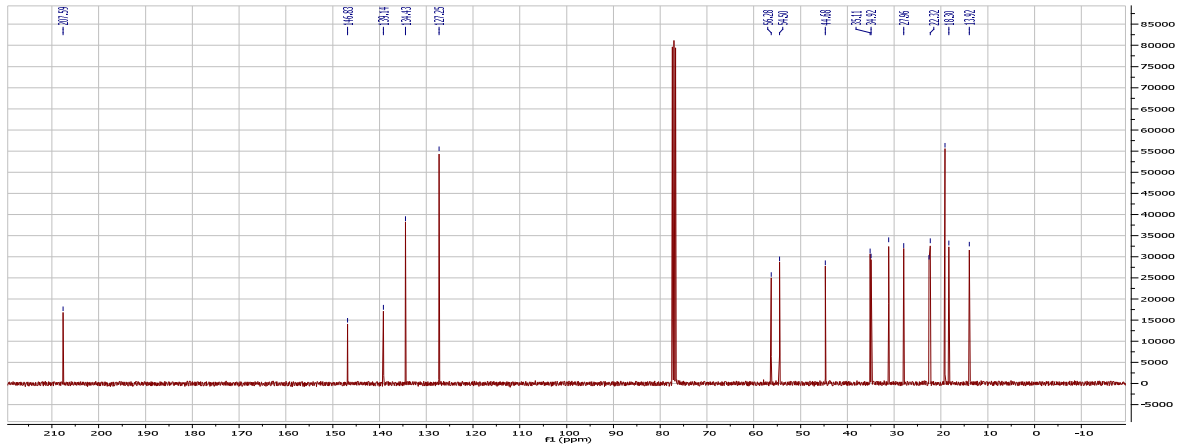

(1) ELSD Signal

141.760

Range: 141.749

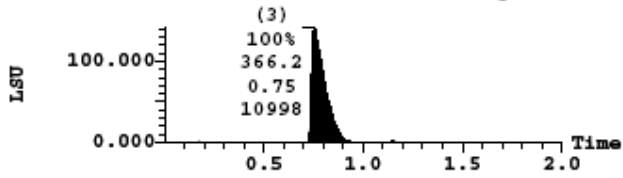

| Peak ID | Compound | Time | Mass Found |
|---------|----------|------|------------|
| 3       | Found    | 0.73 | 366.20     |

3:(Time: 0.73)

1:MS ES+

5.4e+007

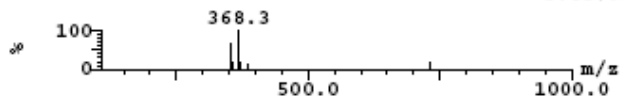

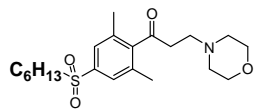

17{3,5,3}

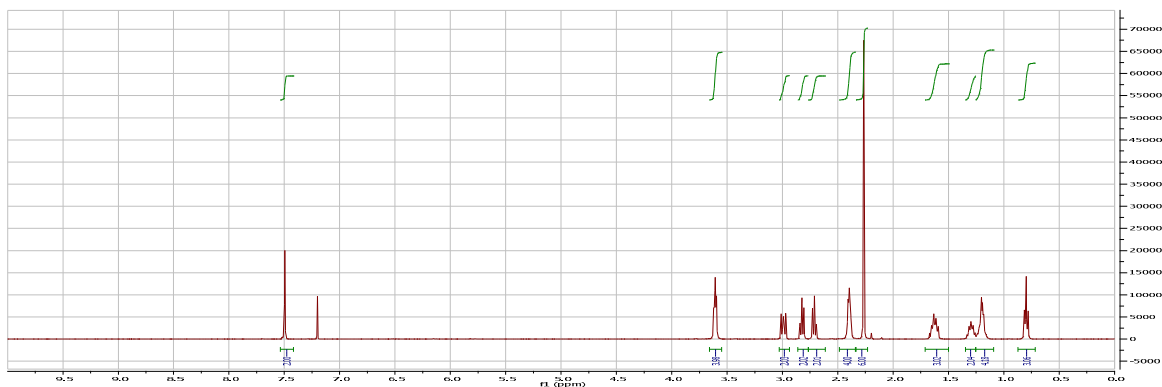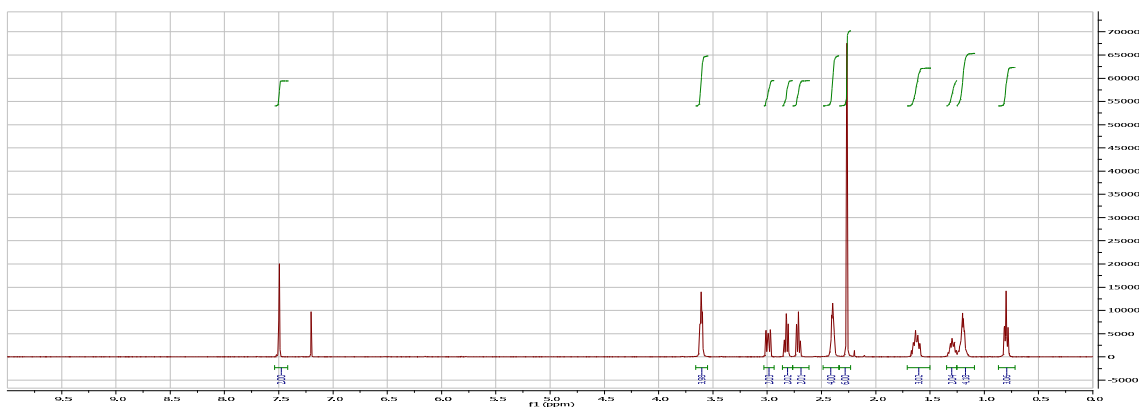

(1) ELSD Signal

151.625

Range: 151.615

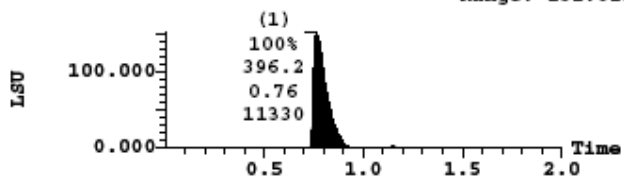

| Peak ID | Compound Found | Time | Mass Found |
|---------|----------------|------|------------|
| 1       | Found          | 0.76 | 396.21     |

1: (Time: 0.76) 1: MS ES+ 1.1e+008

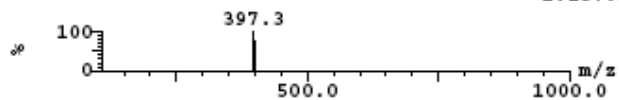

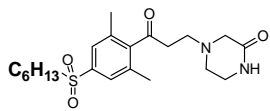

17{3,5,4}

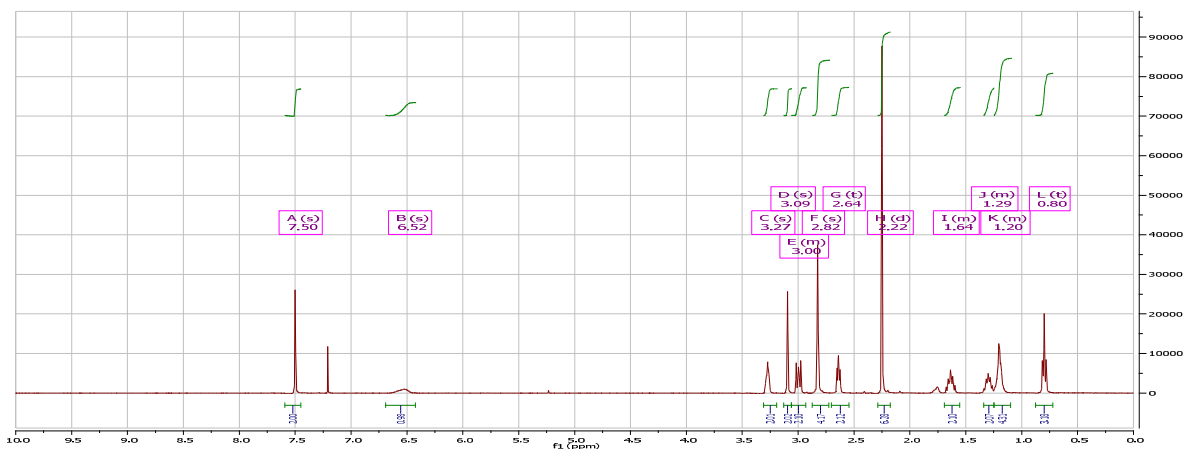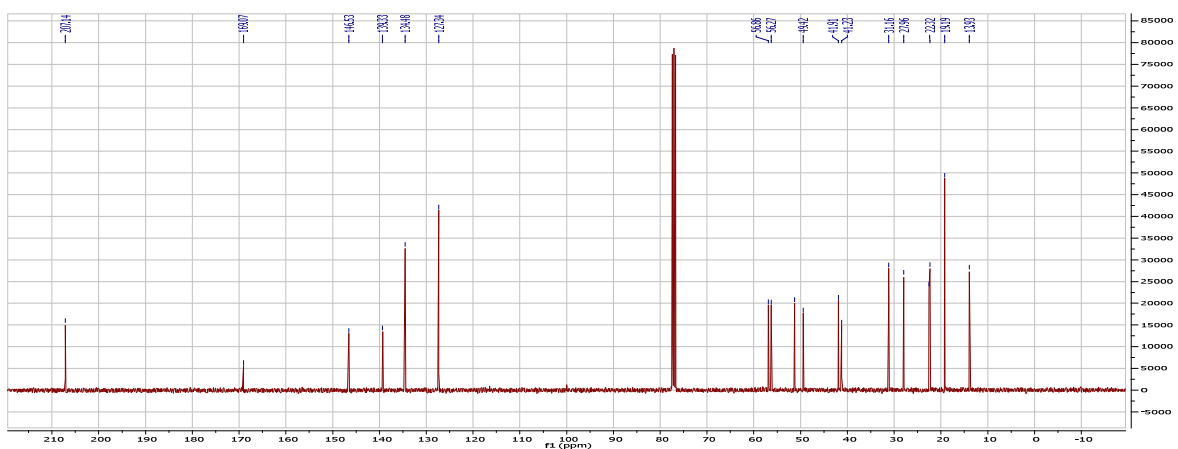

(1) ELSD Signal

76.326

Range: 76.308

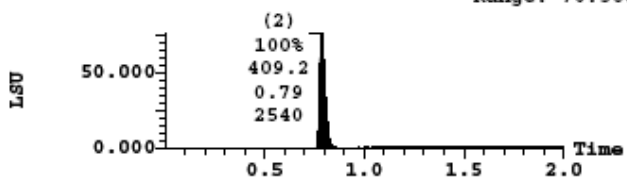

| Peak ID | Compound Found | Time | Mass Found |
|---------|----------------|------|------------|
| 2       | Found          | 0.77 | 409.21     |

2: (Time: 0.77) 1:MS ES+ 1.0e+008

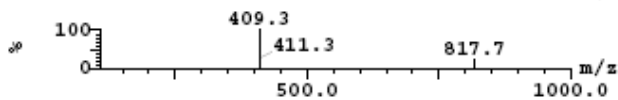

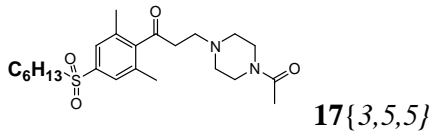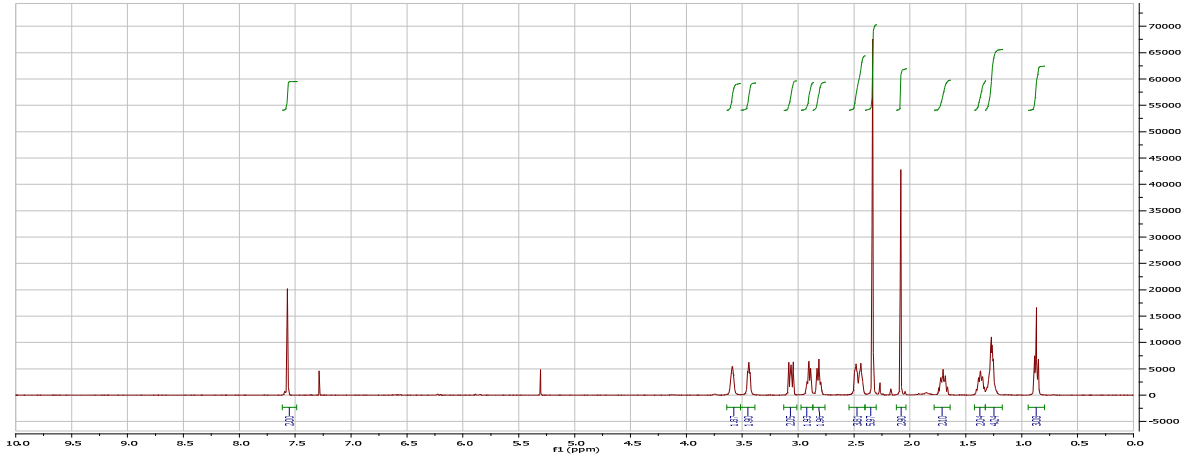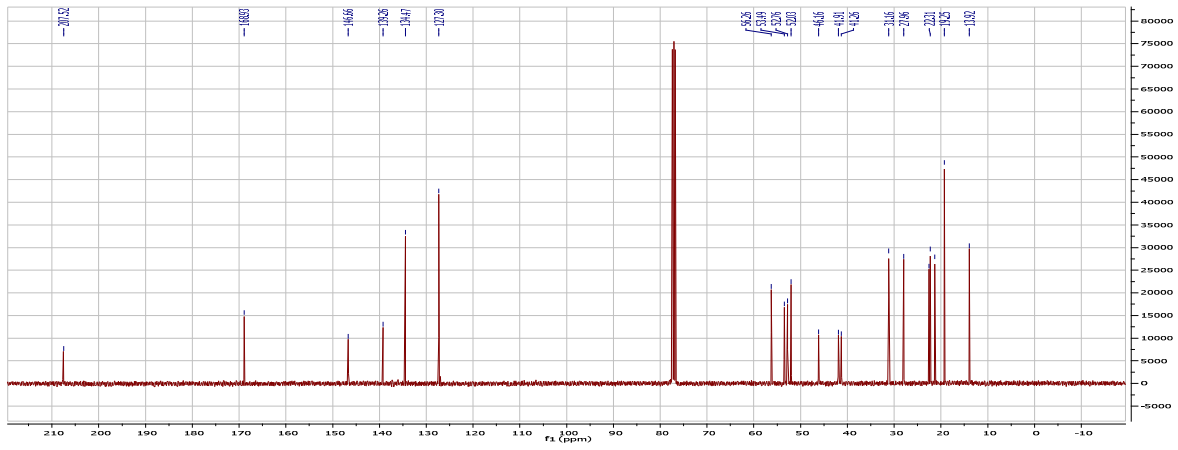

(1) ELSD Signal 197.183  
Range: 197.179

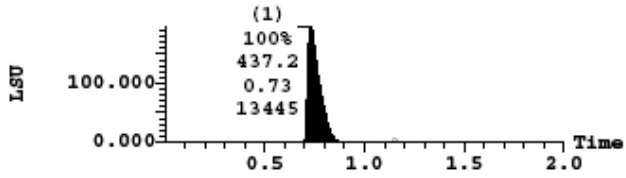

| Peak ID | Compound | Time | Mass Found |
|---------|----------|------|------------|
| 1       | Found    | 0.72 | 437.24     |

1:(Time: 0.72) 1:MS ES+  
8.4e+007

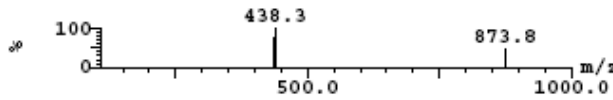

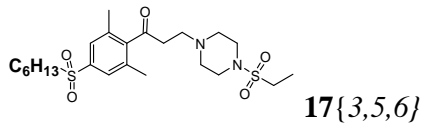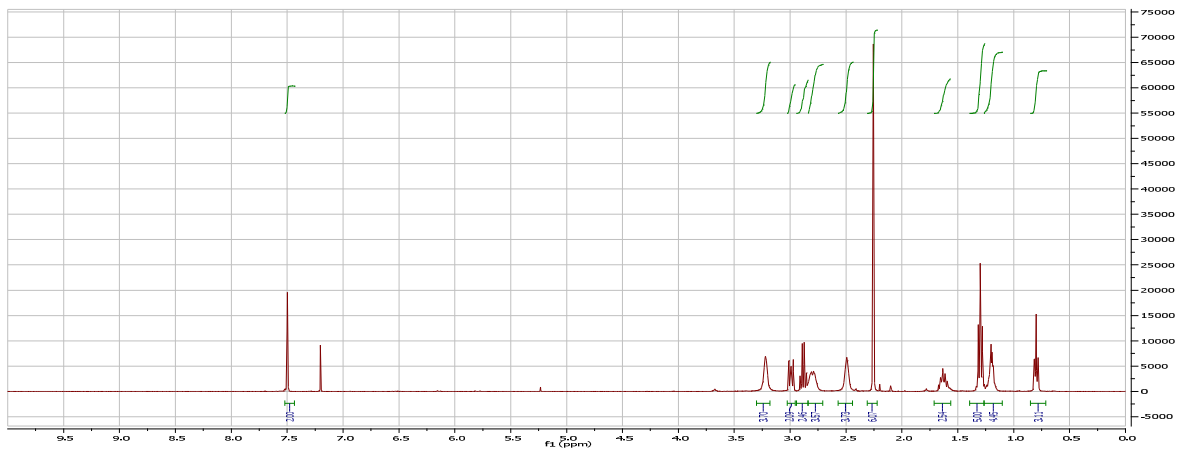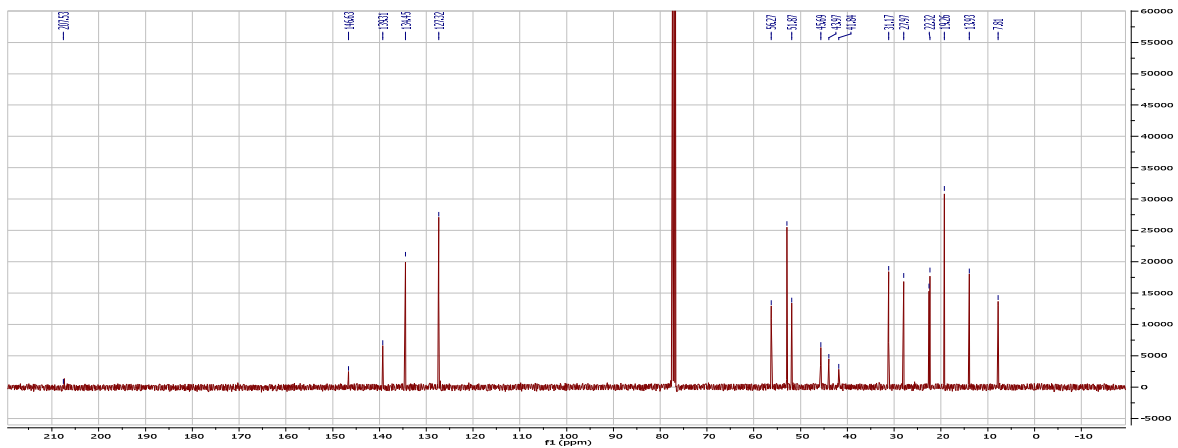

(1) ELSD Signal

31.583

Range: 31.580

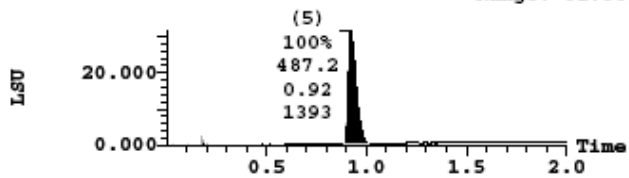

| Peak ID | Compound | Time | Mass Found |
|---------|----------|------|------------|
| 5       | Found    | 0.91 | 487.22     |

5:(Time: 0.91) 1:MS ES+ 1.2e+008

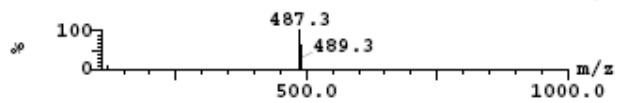

Supplement: NIHMS116066-supplement-suppl1.pdf [file NIHMS116066-supplement-suppl1.pdf]
